# Supplementary material for: The Long Non-coding RNA Flatr Anticipates Foxp3 Expression in Regulatory T Cells
Source: Front Immunol. 2018 Sep 25;9:1989. doi: 10.3389/fimmu.2018.01989 (PMC6167443; doi:10.3389/fimmu.2018.01989)
Supplement: Supplementary Worksheet 1 — Differential expression analysis of Flatr-deficient Tregs. CD4+CD25+ Tregs from wildtype, Exon 1 KO, and Exon 2 KO mice were assessed by RNAseq (n = 3/group). Expression levels and statistical comparisons are given. [file Table_1.XLSX]

## Sheet: mart_export
					raw gene counts									pairwise comparisons
					Exon 1 KO			Exon 2 KO			WT			Exon 1 KO versus WT							Exon 2 KO versus WT							Exon 1 KO versus Exon 2 KO
Gene name	Chromosome	Gene start (bp)	Gene stable ID	Gene description	KO1-1	KO1-2	KO1-3	KO2-1	KO2-2	KO2-3	WT-1	WT-2	WT3	baseMean	log2FoldChange	lfcSE	stat	pvalue	padj	Significant	baseMean	log2FoldChange	lfcSE	stat	pvalue	padj	Significant	baseMean	log2FoldChange	lfcSE	stat	pvalue	padj	Significant
4933401J01Rik	1	3073253	ENSMUSG00000102693	RIKEN cDNA 4933401J01 gene [Source:MGI Symbol;Acc:MGI:1918292]	0	0	0	0	0	0	0	0	0	0	NA	NA	NA	NA	NA	no	0	NA	NA	NA	NA	NA	no	0	NA	NA	NA	NA	NA	no
Gm26206	1	3102016	ENSMUSG00000064842	predicted gene, 26206 [Source:MGI Symbol;Acc:MGI:5455983]	0	0	0	0	0	0	0	0	0	0	NA	NA	NA	NA	NA	no	0	NA	NA	NA	NA	NA	no	0	NA	NA	NA	NA	NA	no
Xkr4	1	3205901	ENSMUSG00000051951	X-linked Kx blood group related 4 [Source:MGI Symbol;Acc:MGI:3528744]	0	0	0	1	0	0	0	0	0	0.109081	0	2.40591	0	1	NA	no	0.109081	0.770953	2.40591	0.320441	0.748634	NA	no	0.109081	-0.474794	2.40591	-0.197345	0.843558	NA	no
Gm18956	1	3252757	ENSMUSG00000102851	predicted gene, 18956 [Source:MGI Symbol;Acc:MGI:5011141]	0	0	0	0	0	0	0	0	0	0	NA	NA	NA	NA	NA	no	0	NA	NA	NA	NA	NA	no	0	NA	NA	NA	NA	NA	no
Gm37180	1	3365731	ENSMUSG00000103377	predicted gene, 37180 [Source:MGI Symbol;Acc:MGI:5610408]	0	0	0	0	0	0	0	0	0	0	NA	NA	NA	NA	NA	no	0	NA	NA	NA	NA	NA	no	0	NA	NA	NA	NA	NA	no
Gm37363	1	3375556	ENSMUSG00000104017	predicted gene, 37363 [Source:MGI Symbol;Acc:MGI:5610591]	0	0	0	0	0	0	0	0	0	0	NA	NA	NA	NA	NA	no	0	NA	NA	NA	NA	NA	no	0	NA	NA	NA	NA	NA	no
Gm37686	1	3464977	ENSMUSG00000103025	predicted gene, 37686 [Source:MGI Symbol;Acc:MGI:5610914]	0	0	0	0	0	0	0	0	0	0	NA	NA	NA	NA	NA	no	0	NA	NA	NA	NA	NA	no	0	NA	NA	NA	NA	NA	no
Gm1992	1	3466587	ENSMUSG00000089699	predicted gene 1992 [Source:MGI Symbol;Acc:MGI:3780162]	0	0	0	0	0	0	0	0	0	0	NA	NA	NA	NA	NA	no	0	NA	NA	NA	NA	NA	no	0	NA	NA	NA	NA	NA	no
Gm37329	1	3512451	ENSMUSG00000103201	predicted gene, 37329 [Source:MGI Symbol;Acc:MGI:5610557]	0	0	0	0	0	0	0	0	0	0	NA	NA	NA	NA	NA	no	0	NA	NA	NA	NA	NA	no	0	NA	NA	NA	NA	NA	no
Gm7341	1	3531795	ENSMUSG00000103147	predicted gene 7341 [Source:MGI Symbol;Acc:MGI:3648497]	0	0	0	0	0	0	0	0	0	0	NA	NA	NA	NA	NA	no	0	NA	NA	NA	NA	NA	no	0	NA	NA	NA	NA	NA	no
Gm38148	1	3592892	ENSMUSG00000103161	predicted gene, 38148 [Source:MGI Symbol;Acc:MGI:5611376]	0	0	0	0	0	0	0	0	0	0	NA	NA	NA	NA	NA	no	0	NA	NA	NA	NA	NA	no	0	NA	NA	NA	NA	NA	no
Gm19938	1	3647309	ENSMUSG00000102331	predicted gene, 19938 [Source:MGI Symbol;Acc:MGI:5012123]	0	0	0	0	0	0	0	0	1	0.107268	-0.270919	2.40591	-0.112606	0.910343	NA	no	0.107268	-0.363204	2.40591	-0.150963	0.880005	NA	no	0.107268	0	2.40591	0	1	NA	no
Gm10568	1	3680155	ENSMUSG00000102348	predicted gene 10568 [Source:MGI Symbol;Acc:MGI:3642703]	0	0	0	0	0	0	0	0	0	0	NA	NA	NA	NA	NA	no	0	NA	NA	NA	NA	NA	no	0	NA	NA	NA	NA	NA	no
Gm38385	1	3752010	ENSMUSG00000102592	predicted gene, 38385 [Source:MGI Symbol;Acc:MGI:5611613]	0	0	0	0	0	0	0	0	0	0	NA	NA	NA	NA	NA	no	0	NA	NA	NA	NA	NA	no	0	NA	NA	NA	NA	NA	no
Gm27396	1	3783876	ENSMUSG00000088333	predicted gene, 27396 [Source:MGI Symbol;Acc:MGI:5530778]	0	0	0	0	0	0	0	0	0	0	NA	NA	NA	NA	NA	no	0	NA	NA	NA	NA	NA	no	0	NA	NA	NA	NA	NA	no
Gm37381	1	3905739	ENSMUSG00000102343	predicted gene, 37381 [Source:MGI Symbol;Acc:MGI:5610609]	0	0	0	0	0	0	0	0	0	0	NA	NA	NA	NA	NA	no	0	NA	NA	NA	NA	NA	no	0	NA	NA	NA	NA	NA	no
Rp1	1	3999557	ENSMUSG00000025900	retinitis pigmentosa 1 (human) [Source:MGI Symbol;Acc:MGI:1341105]	0	0	0	0	0	0	0	0	0	0	NA	NA	NA	NA	NA	no	0	NA	NA	NA	NA	NA	no	0	NA	NA	NA	NA	NA	no
Gm6101	1	4256234	ENSMUSG00000102948	predicted gene 6101 [Source:MGI Symbol;Acc:MGI:3644986]	0	0	0	0	0	0	0	0	0	0	NA	NA	NA	NA	NA	no	0	NA	NA	NA	NA	NA	no	0	NA	NA	NA	NA	NA	no
Gm37483	1	4363346	ENSMUSG00000104123	predicted gene, 37483 [Source:MGI Symbol;Acc:MGI:5610711]	0	0	0	0	0	0	0	0	0	0	NA	NA	NA	NA	NA	no	0	NA	NA	NA	NA	NA	no	0	NA	NA	NA	NA	NA	no
Sox17	1	4490931	ENSMUSG00000025902	SRY (sex determining region Y)-box 17 [Source:MGI Symbol;Acc:MGI:107543]	0	0	0	0	0	0	0	0	0	0	NA	NA	NA	NA	NA	no	0	NA	NA	NA	NA	NA	no	0	NA	NA	NA	NA	NA	no
Gm37587	1	4496551	ENSMUSG00000104238	predicted gene, 37587 [Source:MGI Symbol;Acc:MGI:5610815]	0	0	0	0	0	0	0	0	0	0	NA	NA	NA	NA	NA	no	0	NA	NA	NA	NA	NA	no	0	NA	NA	NA	NA	NA	no
Gm7357	1	4522905	ENSMUSG00000102269	predicted gene 7357 [Source:MGI Symbol;Acc:MGI:3643257]	0	0	0	0	0	0	0	0	0	0	NA	NA	NA	NA	NA	no	0	NA	NA	NA	NA	NA	no	0	NA	NA	NA	NA	NA	no
Gm22307	1	4529017	ENSMUSG00000096126	predicted gene, 22307 [Source:MGI Symbol;Acc:MGI:5452084]	0	0	1	1	0	0	1	0	0	0.286146	0.29616	2.40591	0.123097	0.902031	NA	no	0.286146	0.203875	2.40591	0.0847391	0.932469	NA	no	0.286146	0.0922849	2.40591	0.0383576	0.969403	NA	no
Gm38076	1	4534837	ENSMUSG00000103003	predicted gene, 38076 [Source:MGI Symbol;Acc:MGI:5611304]	0	0	0	0	0	0	0	0	0	0	NA	NA	NA	NA	NA	no	0	NA	NA	NA	NA	NA	no	0	NA	NA	NA	NA	NA	no
Gm37323	1	4583129	ENSMUSG00000104328	predicted gene, 37323 [Source:MGI Symbol;Acc:MGI:5610551]	0	0	0	0	0	0	0	0	0	0	NA	NA	NA	NA	NA	no	0	NA	NA	NA	NA	NA	no	0	NA	NA	NA	NA	NA	no
Gm7369	1	4610471	ENSMUSG00000102735	predicted gene 7369 [Source:MGI Symbol;Acc:MGI:3643485]	0	0	0	0	0	0	0	0	0	0	NA	NA	NA	NA	NA	no	0	NA	NA	NA	NA	NA	no	0	NA	NA	NA	NA	NA	no
Gm6085	1	4687934	ENSMUSG00000098104	predicted gene 6085 [Source:MGI Symbol;Acc:MGI:3646770]	29	4	0	1	15	47	0	5	12	11.0224	0.817205	1.8539	0.440804	0.659355	1	no	11.0224	1.55131	1.84976	0.838654	0.401664	1	no	11.0224	-0.734105	1.84752	-0.397346	0.691112	1	no
Gm6119	1	4692219	ENSMUSG00000102175	predicted gene 6119 [Source:MGI Symbol;Acc:MGI:3644547]	0	0	0	0	0	0	0	0	0	0	NA	NA	NA	NA	NA	no	0	NA	NA	NA	NA	NA	no	0	NA	NA	NA	NA	NA	no
Gm25493	1	4723277	ENSMUSG00000088000	predicted gene, 25493 [Source:MGI Symbol;Acc:MGI:5455270]	0	0	0	0	0	0	0	0	0	0	NA	NA	NA	NA	NA	no	0	NA	NA	NA	NA	NA	no	0	NA	NA	NA	NA	NA	no
Gm2053	1	4735046	ENSMUSG00000103265	predicted gene 2053 [Source:MGI Symbol;Acc:MGI:3780221]	0	0	0	0	0	0	0	0	0	0	NA	NA	NA	NA	NA	no	0	NA	NA	NA	NA	NA	no	0	NA	NA	NA	NA	NA	no
Gm6123	1	4771131	ENSMUSG00000103922	predicted gene 6123 [Source:MGI Symbol;Acc:MGI:3647047]	0	0	0	0	0	0	0	0	0	0	NA	NA	NA	NA	NA	no	0	NA	NA	NA	NA	NA	no	0	NA	NA	NA	NA	NA	no
Mrpl15	1	4773206	ENSMUSG00000033845	mitochondrial ribosomal protein L15 [Source:MGI Symbol;Acc:MGI:1351639]	98	0	212	8	209	92	0	65	0	69.6119	2.15204	1.96925	1.09282	0.274471	0.896907	no	69.6119	2.11015	1.96918	1.07159	0.283904	1	no	69.6119	0.0418881	1.96747	0.0212904	0.983014	1	no
Gm37144	1	4778063	ENSMUSG00000102275	predicted gene, 37144 [Source:MGI Symbol;Acc:MGI:5610372]	2	2	1	0	4	15	1	0	1	2.57386	1.35506	1.98176	0.683763	0.494125	NA	no	2.57386	2.72486	1.9552	1.39365	0.163424	NA	no	2.57386	-1.3698	1.92195	-0.712715	0.476022	NA	no
Lypla1	1	4807788	ENSMUSG00000025903	lysophospholipase 1 [Source:MGI Symbol;Acc:MGI:1344588]	124	272	193	3	370	100	3	246	22	142.356	1.59284	1.46172	1.0897	0.275845	0.899672	no	142.356	1.09694	1.46192	0.750343	0.453048	1	no	142.356	0.495897	1.46101	0.33942	0.734293	1	no
Gm37988	1	4807892	ENSMUSG00000104217	predicted gene, 37988 [Source:MGI Symbol;Acc:MGI:5611216]	0	0	0	0	0	0	0	0	0	0	NA	NA	NA	NA	NA	no	0	NA	NA	NA	NA	NA	no	0	NA	NA	NA	NA	NA	no
Tcea1	1	4857814	ENSMUSG00000033813	transcription elongation factor A (SII) 1 [Source:MGI Symbol;Acc:MGI:1196624]	0	0	0	86	0	0	0	0	0	9.38095	0	2.40591	0	NA	NA	no	9.38095	5.57318	2.38509	2.33667	NA	NA	no	9.38095	-5.44984	2.38509	-2.28496	NA	NA	no
Gm6104	1	4880049	ENSMUSG00000062588	predicted gene 6104 [Source:MGI Symbol;Acc:MGI:3648587]	0	0	0	0	0	0	0	0	0	0	NA	NA	NA	NA	NA	no	0	NA	NA	NA	NA	NA	no	0	NA	NA	NA	NA	NA	no
Gm37277	1	4905751	ENSMUSG00000103280	predicted gene, 37277 [Source:MGI Symbol;Acc:MGI:5610505]	0	0	0	0	0	0	0	0	0	0	NA	NA	NA	NA	NA	no	0	NA	NA	NA	NA	NA	no	0	NA	NA	NA	NA	NA	no
Rgs20	1	4909576	ENSMUSG00000002459	regulator of G-protein signaling 20 [Source:MGI Symbol;Acc:MGI:1929866]	0	0	0	0	0	0	0	0	0	0	NA	NA	NA	NA	NA	no	0	NA	NA	NA	NA	NA	no	0	NA	NA	NA	NA	NA	no
Gm17100	1	4927028	ENSMUSG00000091305	predicted gene 17100 [Source:MGI Symbol;Acc:MGI:4937927]	0	0	0	0	0	0	0	0	0	0	NA	NA	NA	NA	NA	no	0	NA	NA	NA	NA	NA	no	0	NA	NA	NA	NA	NA	no
Gm37079	1	4938576	ENSMUSG00000102653	predicted gene, 37079 [Source:MGI Symbol;Acc:MGI:5610307]	0	0	0	0	0	0	0	0	0	0	NA	NA	NA	NA	NA	no	0	NA	NA	NA	NA	NA	no	0	NA	NA	NA	NA	NA	no
Gm16041	1	4970857	ENSMUSG00000085623	predicted gene 16041 [Source:MGI Symbol;Acc:MGI:3801909]	0	0	0	0	0	0	0	0	0	0	NA	NA	NA	NA	NA	no	0	NA	NA	NA	NA	NA	no	0	NA	NA	NA	NA	NA	no
Gm17101	1	5063060	ENSMUSG00000091665	predicted gene 17101 [Source:MGI Symbol;Acc:MGI:4937928]	0	0	0	0	0	0	0	0	0	0	NA	NA	NA	NA	NA	no	0	NA	NA	NA	NA	NA	no	0	NA	NA	NA	NA	NA	no
Atp6v1h	1	5070018	ENSMUSG00000033793	ATPase, H+ transporting, lysosomal V1 subunit H [Source:MGI Symbol;Acc:MGI:1914864]	57	72	174	2	0	86	192	1	38	59.9243	0.936265	1.66405	0.562641	0.573679	1	no	59.9243	-0.881358	1.6667	-0.528803	0.596942	1	no	59.9243	1.81762	1.66625	1.09084	0.275341	1	no
Gm7182	1	5276106	ENSMUSG00000104352	predicted gene 7182 [Source:MGI Symbol;Acc:MGI:3644877]	0	0	0	0	0	0	0	0	0	0	NA	NA	NA	NA	NA	no	0	NA	NA	NA	NA	NA	no	0	NA	NA	NA	NA	NA	no
Gm37567	1	5307739	ENSMUSG00000104046	predicted gene, 37567 [Source:MGI Symbol;Acc:MGI:5610795]	0	0	0	0	0	0	0	0	0	0	NA	NA	NA	NA	NA	no	0	NA	NA	NA	NA	NA	no	0	NA	NA	NA	NA	NA	no
Gm38264	1	5403547	ENSMUSG00000102907	predicted gene, 38264 [Source:MGI Symbol;Acc:MGI:5611492]	0	0	0	0	0	0	0	0	0	0	NA	NA	NA	NA	NA	no	0	NA	NA	NA	NA	NA	no	0	NA	NA	NA	NA	NA	no
Oprk1	1	5588466	ENSMUSG00000025905	opioid receptor, kappa 1 [Source:MGI Symbol;Acc:MGI:97439]	0	0	0	0	0	0	0	0	0	0	NA	NA	NA	NA	NA	no	0	NA	NA	NA	NA	NA	no	0	NA	NA	NA	NA	NA	no
Gm36965	1	5617837	ENSMUSG00000103936	predicted gene, 36965 [Source:MGI Symbol;Acc:MGI:5610193]	2	1	0	2	1	0	1	1	1	0.90344	0.314055	2.15778	0.145545	0.884281	NA	no	0.90344	0.286737	2.15368	0.133138	0.894084	NA	no	0.90344	0.0273177	2.15887	0.0126537	0.989904	NA	no
Gm22463	1	5644645	ENSMUSG00000093015	predicted gene, 22463 [Source:MGI Symbol;Acc:MGI:5452240]	0	0	0	0	0	0	0	0	0	0	NA	NA	NA	NA	NA	no	0	NA	NA	NA	NA	NA	no	0	NA	NA	NA	NA	NA	no
Gm37429	1	5842874	ENSMUSG00000103519	predicted gene, 37429 [Source:MGI Symbol;Acc:MGI:5610657]	0	0	0	0	0	0	0	0	0	0	NA	NA	NA	NA	NA	no	0	NA	NA	NA	NA	NA	no	0	NA	NA	NA	NA	NA	no
Npbwr1	1	5913707	ENSMUSG00000033774	neuropeptides B/W receptor 1 [Source:MGI Symbol;Acc:MGI:891989]	0	0	0	0	0	0	0	0	0	0	NA	NA	NA	NA	NA	no	0	NA	NA	NA	NA	NA	no	0	NA	NA	NA	NA	NA	no
Gm19214	1	6048963	ENSMUSG00000103090	predicted gene, 19214 [Source:MGI Symbol;Acc:MGI:5011399]	0	0	0	0	0	0	0	0	0	0	NA	NA	NA	NA	NA	no	0	NA	NA	NA	NA	NA	no	0	NA	NA	NA	NA	NA	no
Rb1cc1	1	6206197	ENSMUSG00000025907	RB1-inducible coiled-coil 1 [Source:MGI Symbol;Acc:MGI:1341850]	149	118	71	97	1	248	101	552	178	139.698	-0.73827	1.27951	-0.576992	0.563945	0.996498	no	139.698	-0.926618	1.27953	-0.724184	0.468952	1	no	139.698	0.188348	1.28054	0.147084	0.883066	1	no
4732440D04Rik	1	6209866	ENSMUSG00000090031	RIKEN cDNA 4732440D04 gene [Source:MGI Symbol;Acc:MGI:3604103]	0	0	0	0	0	0	0	0	56	6.00703	-5.10636	2.38531	-2.14075	NA	NA	no	6.00703	-5.15038	2.38531	-2.15921	NA	NA	no	6.00703	0	2.40591	0	NA	NA	no
Alkal1	1	6359218	ENSMUSG00000087247	ALK and LTK ligand 1 [Source:MGI Symbol;Acc:MGI:3645495]	0	0	0	0	0	0	0	0	0	0	NA	NA	NA	NA	NA	no	0	NA	NA	NA	NA	NA	no	0	NA	NA	NA	NA	NA	no
Gm2147	1	6380394	ENSMUSG00000103355	predicted gene 2147 [Source:MGI Symbol;Acc:MGI:3780316]	0	0	0	0	0	0	0	0	0	0	NA	NA	NA	NA	NA	no	0	NA	NA	NA	NA	NA	no	0	NA	NA	NA	NA	NA	no
Gm7417	1	6382634	ENSMUSG00000102706	predicted gene 7417 [Source:MGI Symbol;Acc:MGI:3647903]	0	0	0	0	0	0	0	0	0	0	NA	NA	NA	NA	NA	no	0	NA	NA	NA	NA	NA	no	0	NA	NA	NA	NA	NA	no
Gm19026	1	6429655	ENSMUSG00000103845	predicted gene, 19026 [Source:MGI Symbol;Acc:MGI:5011211]	0	0	0	0	0	0	0	0	0	0	NA	NA	NA	NA	NA	no	0	NA	NA	NA	NA	NA	no	0	NA	NA	NA	NA	NA	no
St18	1	6487231	ENSMUSG00000033740	suppression of tumorigenicity 18 [Source:MGI Symbol;Acc:MGI:2446700]	0	0	0	0	0	0	0	0	0	0	NA	NA	NA	NA	NA	no	0	NA	NA	NA	NA	NA	no	0	NA	NA	NA	NA	NA	no
Gm42492	1	6861237	ENSMUSG00000103329	predicted gene 42492 [Source:MGI Symbol;Acc:MGI:5662629]	0	0	0	0	0	0	0	0	0	0	NA	NA	NA	NA	NA	no	0	NA	NA	NA	NA	NA	no	0	NA	NA	NA	NA	NA	no
Gm7449	1	6910560	ENSMUSG00000104385	predicted gene 7449 [Source:MGI Symbol;Acc:MGI:3647895]	0	0	0	0	0	0	0	0	1	0.107268	-0.270919	2.40591	-0.112606	0.910343	NA	no	0.107268	-0.363204	2.40591	-0.150963	0.880005	NA	no	0.107268	0	2.40591	0	1	NA	no
Gm37108	1	6916559	ENSMUSG00000102135	predicted gene, 37108 [Source:MGI Symbol;Acc:MGI:5610336]	9	10	2	7	10	7	16	4	3	6.64284	0.518844	1.25866	0.412219	0.680179	NA	no	6.64284	0.520368	1.25542	0.414497	0.67851	NA	no	6.64284	-0.0015239	1.25492	-0.00121434	0.999031	NA	no
Gm37275	1	6929759	ENSMUSG00000103282	predicted gene, 37275 [Source:MGI Symbol;Acc:MGI:5610503]	0	0	0	0	0	0	0	0	0	0	NA	NA	NA	NA	NA	no	0	NA	NA	NA	NA	NA	no	0	NA	NA	NA	NA	NA	no
Gm37225	1	6998217	ENSMUSG00000102534	predicted gene, 37225 [Source:MGI Symbol;Acc:MGI:5610453]	0	0	0	0	0	0	0	0	0	0	NA	NA	NA	NA	NA	no	0	NA	NA	NA	NA	NA	no	0	NA	NA	NA	NA	NA	no
Gm37489	1	7013762	ENSMUSG00000102213	predicted gene, 37489 [Source:MGI Symbol;Acc:MGI:5610717]	0	0	0	0	0	0	0	0	0	0	NA	NA	NA	NA	NA	no	0	NA	NA	NA	NA	NA	no	0	NA	NA	NA	NA	NA	no
Gm5694	1	7035915	ENSMUSG00000103629	predicted gene 5694 [Source:MGI Symbol;Acc:MGI:3645764]	0	0	0	0	0	0	0	0	0	0	NA	NA	NA	NA	NA	no	0	NA	NA	NA	NA	NA	no	0	NA	NA	NA	NA	NA	no
Pcmtd1	1	7088920	ENSMUSG00000051285	protein-L-isoaspartate (D-aspartate) O-methyltransferase domain containing 1 [Source:MGI Symbol;Acc:MGI:2441773]	93	1	1	0	6	0	1	0	39	13.8756	0.847006	2.1206	0.399419	NA	NA	no	13.8756	-1.92144	2.13178	-0.901331	NA	NA	no	13.8756	2.76844	2.13116	1.29903	NA	NA	no
Gm26983	1	7136199	ENSMUSG00000098201	predicted gene, 26983 [Source:MGI Symbol;Acc:MGI:5504098]	6	4	9	11	7	5	10	6	5	6.19371	0.361243	1.13907	0.317139	0.751138	NA	no	6.19371	0.518993	1.13116	0.458813	0.646368	NA	no	6.19371	-0.157751	1.13461	-0.139035	0.889422	NA	no
Gm38372	1	7148110	ENSMUSG00000103509	predicted gene, 38372 [Source:MGI Symbol;Acc:MGI:5611600]	0	0	0	0	0	0	0	0	0	0	NA	NA	NA	NA	NA	no	0	NA	NA	NA	NA	NA	no	0	NA	NA	NA	NA	NA	no
Gm9826	1	7177739	ENSMUSG00000048538	predicted gene 9826 [Source:MGI Symbol;Acc:MGI:3642725]	0	0	0	0	0	0	0	0	0	0	NA	NA	NA	NA	NA	no	0	NA	NA	NA	NA	NA	no	0	NA	NA	NA	NA	NA	no
Nras-ps2	1	7189742	ENSMUSG00000103709	neuroblastoma ras oncogene, pseudogene 2 [Source:MGI Symbol;Acc:MGI:97378]	0	0	0	0	0	0	0	0	0	0	NA	NA	NA	NA	NA	no	0	NA	NA	NA	NA	NA	no	0	NA	NA	NA	NA	NA	no
Gm23274	1	7265803	ENSMUSG00000077244	predicted gene, 23274 [Source:MGI Symbol;Acc:MGI:5453051]	0	0	0	0	0	0	0	0	0	0	NA	NA	NA	NA	NA	no	0	NA	NA	NA	NA	NA	no	0	NA	NA	NA	NA	NA	no
Gm19002	1	7315451	ENSMUSG00000102768	predicted gene, 19002 [Source:MGI Symbol;Acc:MGI:5011187]	0	0	0	0	0	0	0	0	0	0	NA	NA	NA	NA	NA	no	0	NA	NA	NA	NA	NA	no	0	NA	NA	NA	NA	NA	no
Gm26901	1	7349406	ENSMUSG00000097797	predicted gene, 26901 [Source:MGI Symbol;Acc:MGI:5477395]	0	0	0	0	0	0	0	0	0	0	NA	NA	NA	NA	NA	no	0	NA	NA	NA	NA	NA	no	0	NA	NA	NA	NA	NA	no
Gm18984	1	7410679	ENSMUSG00000103498	predicted gene, 18984 [Source:MGI Symbol;Acc:MGI:5011169]	0	0	0	0	0	0	0	0	0	0	NA	NA	NA	NA	NA	no	0	NA	NA	NA	NA	NA	no	0	NA	NA	NA	NA	NA	no
Gm30414	1	7497968	ENSMUSG00000103067	predicted gene, 30414 [Source:MGI Symbol;Acc:MGI:5589573]	0	0	0	0	0	0	0	0	0	0	NA	NA	NA	NA	NA	no	0	NA	NA	NA	NA	NA	no	0	NA	NA	NA	NA	NA	no
Gm37791	1	7591646	ENSMUSG00000102320	predicted gene, 37791 [Source:MGI Symbol;Acc:MGI:5611019]	0	0	0	0	0	0	0	0	0	0	NA	NA	NA	NA	NA	no	0	NA	NA	NA	NA	NA	no	0	NA	NA	NA	NA	NA	no
Gm7470	1	7597379	ENSMUSG00000104226	predicted gene 7470 [Source:MGI Symbol;Acc:MGI:3645544]	0	0	0	0	0	0	0	0	0	0	NA	NA	NA	NA	NA	no	0	NA	NA	NA	NA	NA	no	0	NA	NA	NA	NA	NA	no
Rps2-ps2	1	7664081	ENSMUSG00000103903	ribosomal protein S2, pseudogene 2 [Source:MGI Symbol;Acc:MGI:3645546]	1	2	1	0	0	0	0	0	0	0.490909	2.19175	2.39771	0.914102	0.360663	NA	no	0.490909	0	2.40591	0	1	NA	no	0.490909	1.98788	2.39771	0.829074	0.407063	NA	no
Gm38216	1	7728861	ENSMUSG00000103557	predicted gene, 38216 [Source:MGI Symbol;Acc:MGI:5611444]	0	0	0	0	0	0	0	0	0	0	NA	NA	NA	NA	NA	no	0	NA	NA	NA	NA	NA	no	0	NA	NA	NA	NA	NA	no
Sntg1	1	8361475	ENSMUSG00000025909	syntrophin, gamma 1 [Source:MGI Symbol;Acc:MGI:1918346]	0	0	0	0	0	0	0	0	0	0	NA	NA	NA	NA	NA	no	0	NA	NA	NA	NA	NA	no	0	NA	NA	NA	NA	NA	no
Gm38024	1	8450960	ENSMUSG00000102647	predicted gene, 38024 [Source:MGI Symbol;Acc:MGI:5611252]	0	0	0	0	0	0	0	0	0	0	NA	NA	NA	NA	NA	no	0	NA	NA	NA	NA	NA	no	0	NA	NA	NA	NA	NA	no
Gm16284	1	8468426	ENSMUSG00000086235	predicted gene 16284 [Source:MGI Symbol;Acc:MGI:3826541]	0	0	0	0	0	0	0	0	0	0	NA	NA	NA	NA	NA	no	0	NA	NA	NA	NA	NA	no	0	NA	NA	NA	NA	NA	no
Gm38259	1	8527780	ENSMUSG00000102253	predicted gene, 38259 [Source:MGI Symbol;Acc:MGI:5611487]	0	0	0	0	0	0	0	0	0	0	NA	NA	NA	NA	NA	no	0	NA	NA	NA	NA	NA	no	0	NA	NA	NA	NA	NA	no
Gm23358	1	8588615	ENSMUSG00000093970	predicted gene, 23358 [Source:MGI Symbol;Acc:MGI:5453135]	0	0	0	0	0	0	0	0	0	0	NA	NA	NA	NA	NA	no	0	NA	NA	NA	NA	NA	no	0	NA	NA	NA	NA	NA	no
Gm37005	1	8643696	ENSMUSG00000103884	predicted gene, 37005 [Source:MGI Symbol;Acc:MGI:5610233]	0	0	0	0	0	0	0	0	0	0	NA	NA	NA	NA	NA	no	0	NA	NA	NA	NA	NA	no	0	NA	NA	NA	NA	NA	no
Gm15452	1	8791923	ENSMUSG00000084353	predicted gene 15452 [Source:MGI Symbol;Acc:MGI:3768636]	0	0	0	0	0	0	0	0	0	0	NA	NA	NA	NA	NA	no	0	NA	NA	NA	NA	NA	no	0	NA	NA	NA	NA	NA	no
Gm36964	1	8815842	ENSMUSG00000103933	predicted gene, 36964 [Source:MGI Symbol;Acc:MGI:5610192]	8	7	9	4	0	1	2	0	2	3.62985	2.56353	1.77388	1.44516	0.148413	NA	no	3.62985	0.518966	1.81112	0.286544	0.774461	NA	no	3.62985	2.04457	1.76654	1.15738	0.247116	NA	no
Gm24276	1	8816138	ENSMUSG00000076135	predicted gene, 24276 [Source:MGI Symbol;Acc:MGI:5454053]	55	231	39	153	26	22	28	165	39	82.4221	1.12283	1.20659	0.930582	0.35207	0.956133	no	82.4221	0.205814	1.20783	0.170399	0.864696	1	no	82.4221	0.917013	1.20682	0.759861	0.447338	1	no
Gm6152	1	8855928	ENSMUSG00000086195	predicted gene 6152 [Source:MGI Symbol;Acc:MGI:3648859]	0	0	0	0	0	0	0	0	0	0	NA	NA	NA	NA	NA	no	0	NA	NA	NA	NA	NA	no	0	NA	NA	NA	NA	NA	no
Gm7445	1	8856763	ENSMUSG00000104504	predicted gene 7445 [Source:MGI Symbol;Acc:MGI:3644942]	0	0	0	0	0	0	0	0	0	0	NA	NA	NA	NA	NA	no	0	NA	NA	NA	NA	NA	no	0	NA	NA	NA	NA	NA	no
Gm7493	1	8962996	ENSMUSG00000066693	predicted gene 7493 [Source:MGI Symbol;Acc:MGI:3643471]	0	0	0	0	0	0	0	0	0	0	NA	NA	NA	NA	NA	no	0	NA	NA	NA	NA	NA	no	0	NA	NA	NA	NA	NA	no
Gm37629	1	9191067	ENSMUSG00000102316	predicted gene, 37629 [Source:MGI Symbol;Acc:MGI:5610857]	0	0	0	0	0	0	0	0	0	0	NA	NA	NA	NA	NA	no	0	NA	NA	NA	NA	NA	no	0	NA	NA	NA	NA	NA	no
Gm38008	1	9258617	ENSMUSG00000103819	predicted gene, 38008 [Source:MGI Symbol;Acc:MGI:5611236]	0	0	0	0	0	0	0	0	0	0	NA	NA	NA	NA	NA	no	0	NA	NA	NA	NA	NA	no	0	NA	NA	NA	NA	NA	no
Gm37143	1	9286922	ENSMUSG00000102871	predicted gene, 37143 [Source:MGI Symbol;Acc:MGI:5610371]	0	0	0	0	0	0	0	0	0	0	NA	NA	NA	NA	NA	no	0	NA	NA	NA	NA	NA	no	0	NA	NA	NA	NA	NA	no
Gm6187	1	9396773	ENSMUSG00000101571	predicted gene 6187 [Source:MGI Symbol;Acc:MGI:3648954]	0	0	0	0	0	0	0	0	0	0	NA	NA	NA	NA	NA	no	0	NA	NA	NA	NA	NA	no	0	NA	NA	NA	NA	NA	no
Gm18299	1	9439741	ENSMUSG00000104428	predicted gene, 18299 [Source:MGI Symbol;Acc:MGI:5010484]	0	0	0	0	0	0	0	0	0	0	NA	NA	NA	NA	NA	no	0	NA	NA	NA	NA	NA	no	0	NA	NA	NA	NA	NA	no
Gm7512	1	9450579	ENSMUSG00000102272	predicted gene 7512 [Source:MGI Symbol;Acc:MGI:3646401]	0	0	0	0	0	0	0	0	0	0	NA	NA	NA	NA	NA	no	0	NA	NA	NA	NA	NA	no	0	NA	NA	NA	NA	NA	no
Gm24765	1	9458670	ENSMUSG00000065625	predicted gene, 24765 [Source:MGI Symbol;Acc:MGI:5454542]	0	0	0	0	0	0	0	0	0	0	NA	NA	NA	NA	NA	no	0	NA	NA	NA	NA	NA	no	0	NA	NA	NA	NA	NA	no
Gm18300	1	9499338	ENSMUSG00000103411	predicted gene, 18300 [Source:MGI Symbol;Acc:MGI:5010485]	0	0	0	0	0	0	0	0	0	0	NA	NA	NA	NA	NA	no	0	NA	NA	NA	NA	NA	no	0	NA	NA	NA	NA	NA	no
Rrs1	1	9545408	ENSMUSG00000061024	ribosome biogenesis regulator 1 [Source:MGI Symbol;Acc:MGI:1929721]	343	18	660	126	254	460	311	293	214	257.476	0.699504	1.0422	0.671179	0.502106	0.99208	no	257.476	0.33812	1.04232	0.32439	0.745643	1	no	257.476	0.361384	1.04219	0.346755	0.728775	1	no
Adhfe1	1	9547948	ENSMUSG00000025911	alcohol dehydrogenase, iron containing, 1 [Source:MGI Symbol;Acc:MGI:1923437]	0	0	1	0	0	0	0	0	0	0.111927	0.863238	2.40591	0.358799	0.719746	NA	no	0.111927	0	2.40591	0	1	NA	no	0.111927	0.659364	2.40591	0.27406	0.784039	NA	no
2610203C22Rik	1	9560832	ENSMUSG00000079671	RIKEN cDNA 2610203C22 gene [Source:MGI Symbol;Acc:MGI:1919731]	0	0	0	0	0	0	0	0	0	0	NA	NA	NA	NA	NA	no	0	NA	NA	NA	NA	NA	no	0	NA	NA	NA	NA	NA	no
Gm6161	1	9574548	ENSMUSG00000081441	predicted gene 6161 [Source:MGI Symbol;Acc:MGI:3644104]	0	0	0	0	0	0	0	0	0	0	NA	NA	NA	NA	NA	no	0	NA	NA	NA	NA	NA	no	0	NA	NA	NA	NA	NA	no
3110035E14Rik	1	9601199	ENSMUSG00000067879	RIKEN cDNA 3110035E14 gene [Source:MGI Symbol;Acc:MGI:1924232]	0	0	0	0	0	0	0	0	0	0	NA	NA	NA	NA	NA	no	0	NA	NA	NA	NA	NA	no	0	NA	NA	NA	NA	NA	no
Gm29520	1	9639255	ENSMUSG00000099827	predicted gene 29520 [Source:MGI Symbol;Acc:MGI:5580226]	0	0	0	0	0	0	0	0	0	0	NA	NA	NA	NA	NA	no	0	NA	NA	NA	NA	NA	no	0	NA	NA	NA	NA	NA	no
Mybl1	1	9667415	ENSMUSG00000025912	myeloblastosis oncogene-like 1 [Source:MGI Symbol;Acc:MGI:99925]	0	0	0	0	0	0	0	0	0	0	NA	NA	NA	NA	NA	no	0	NA	NA	NA	NA	NA	no	0	NA	NA	NA	NA	NA	no
Vcpip1	1	9718622	ENSMUSG00000045210	valosin containing protein (p97)/p47 complex interacting protein 1 [Source:MGI Symbol;Acc:MGI:1917925]	175	35	41	2	115	433	760	0	133	142.386	-1.12001	1.65984	-0.67477	0.499822	0.99208	no	142.386	-0.24188	1.65909	-0.14579	0.884087	1	no	142.386	-0.878128	1.66006	-0.528974	0.596824	1	no
1700034P13Rik	1	9747648	ENSMUSG00000097893	RIKEN cDNA 1700034P13 gene [Source:MGI Symbol;Acc:MGI:1920581]	0	0	0	0	0	0	0	0	0	0	NA	NA	NA	NA	NA	no	0	NA	NA	NA	NA	NA	no	0	NA	NA	NA	NA	NA	no
Sgk3	1	9798107	ENSMUSG00000025915	serum/glucocorticoid regulated kinase 3 [Source:MGI Symbol;Acc:MGI:2182368]	0	0	0	0	0	13	0	0	0	1.20298	0	2.40591	0	NA	NA	no	1.20298	3.10167	2.38989	1.29783	NA	NA	no	1.20298	-2.80551	2.38989	-1.17391	NA	NA	no
Gm6195	1	9802197	ENSMUSG00000046334	predicted pseudogene 6195 [Source:MGI Symbol;Acc:MGI:3647661]	0	0	0	0	0	0	0	0	0	0	NA	NA	NA	NA	NA	no	0	NA	NA	NA	NA	NA	no	0	NA	NA	NA	NA	NA	no
Gm22607	1	9834498	ENSMUSG00000088916	predicted gene, 22607 [Source:MGI Symbol;Acc:MGI:5452384]	0	0	0	0	0	0	0	0	0	0	NA	NA	NA	NA	NA	no	0	NA	NA	NA	NA	NA	no	0	NA	NA	NA	NA	NA	no
Mcmdc2	1	9908638	ENSMUSG00000046101	minichromosome maintenance domain containing 2 [Source:MGI Symbol;Acc:MGI:3045334]	0	0	0	0	0	0	0	0	0	0	NA	NA	NA	NA	NA	no	0	NA	NA	NA	NA	NA	no	0	NA	NA	NA	NA	NA	no
Snhg6	1	9941959	ENSMUSG00000098234	small nucleolar RNA host gene 6 [Source:MGI Symbol;Acc:MGI:1921074]	140	66	9	8	3	0	1	0	16	26.533	3.23894	1.71302	1.89077	0.0586548	0.480838	no	26.533	-0.465063	1.73358	-0.268267	0.788494	1	no	26.533	3.704	1.7225	2.15037	0.0315262	0.390946	no
Snord87	1	9942463	ENSMUSG00000093178	small nucleolar RNA, C/D box 87 [Source:MGI Symbol;Acc:MGI:2387894]	0	0	0	0	0	0	0	0	0	0	NA	NA	NA	NA	NA	no	0	NA	NA	NA	NA	NA	no	0	NA	NA	NA	NA	NA	no
Tcf24	1	9960163	ENSMUSG00000099032	transcription factor 24 [Source:MGI Symbol;Acc:MGI:3780500]	0	0	0	0	0	0	0	0	0	0	NA	NA	NA	NA	NA	no	0	NA	NA	NA	NA	NA	no	0	NA	NA	NA	NA	NA	no
E330040D14Rik	1	9967314	ENSMUSG00000104025	RIKEN cDNA E330040D14 gene [Source:MGI Symbol;Acc:MGI:3649088]	0	0	0	0	0	0	0	0	0	0	NA	NA	NA	NA	NA	no	0	NA	NA	NA	NA	NA	no	0	NA	NA	NA	NA	NA	no
Ppp1r42	1	9968624	ENSMUSG00000025916	protein phosphatase 1, regulatory subunit 42 [Source:MGI Symbol;Acc:MGI:1921138]	0	0	0	0	0	0	0	0	0	0	NA	NA	NA	NA	NA	no	0	NA	NA	NA	NA	NA	no	0	NA	NA	NA	NA	NA	no
Gm15818	1	9982387	ENSMUSG00000087199	predicted gene 15818 [Source:MGI Symbol;Acc:MGI:3801960]	0	0	0	0	0	0	0	0	0	0	NA	NA	NA	NA	NA	no	0	NA	NA	NA	NA	NA	no	0	NA	NA	NA	NA	NA	no
Gm24674	1	10009814	ENSMUSG00000095780	predicted gene, 24674 [Source:MGI Symbol;Acc:MGI:5454451]	0	0	0	0	0	0	0	0	0	0	NA	NA	NA	NA	NA	no	0	NA	NA	NA	NA	NA	no	0	NA	NA	NA	NA	NA	no
Cops5	1	10024601	ENSMUSG00000025917	COP9 signalosome subunit 5 [Source:MGI Symbol;Acc:MGI:1349415]	11	3	295	58	196	123	2	55	146	93.13	0.705399	1.51823	0.464619	0.642204	1	no	93.13	0.854549	1.51794	0.562967	0.573457	1	no	93.13	-0.14915	1.51771	-0.0982734	0.921715	1	no
Cspp1	1	10037987	ENSMUSG00000056763	centrosome and spindle pole associated protein 1 [Source:MGI Symbol;Acc:MGI:2681832]	0	2	27	371	0	0	38	266	190	86.695	-2.81137	2.01845	-1.39284	NA	NA	no	86.695	-0.0687248	2.01496	-0.0341073	NA	NA	no	86.695	-2.74265	2.01857	-1.35871	NA	NA	no
1700047N06Rik	1	10057025	ENSMUSG00000102356	RIKEN cDNA 1700047N06 gene [Source:MGI Symbol;Acc:MGI:1923853]	0	0	0	0	0	0	0	0	0	0	NA	NA	NA	NA	NA	no	0	NA	NA	NA	NA	NA	no	0	NA	NA	NA	NA	NA	no
Arfgef1	1	10137571	ENSMUSG00000067851	ADP-ribosylation factor guanine nucleotide-exchange factor 1(brefeldin A-inhibited) [Source:MGI Symbol;Acc:MGI:2442988]	141	36	113	98	210	319	4	194	6	109.264	0.922202	1.27234	0.724805	0.468571	0.988513	no	109.264	1.86537	1.27113	1.46748	0.142245	0.832301	no	109.264	-0.943163	1.27035	-0.742443	0.457819	1	no
Gm26348	1	10166539	ENSMUSG00000088153	predicted gene, 26348 [Source:MGI Symbol;Acc:MGI:5456125]	0	0	0	0	0	0	0	0	0	0	NA	NA	NA	NA	NA	no	0	NA	NA	NA	NA	NA	no	0	NA	NA	NA	NA	NA	no
Gm37569	1	10197081	ENSMUSG00000102556	predicted gene, 37569 [Source:MGI Symbol;Acc:MGI:5610797]	0	0	0	0	0	0	0	0	0	0	NA	NA	NA	NA	NA	no	0	NA	NA	NA	NA	NA	no	0	NA	NA	NA	NA	NA	no
Cpa6	1	10324720	ENSMUSG00000042501	carboxypeptidase A6 [Source:MGI Symbol;Acc:MGI:3045348]	0	0	0	0	0	0	0	0	0	0	NA	NA	NA	NA	NA	no	0	NA	NA	NA	NA	NA	no	0	NA	NA	NA	NA	NA	no
Gm38005	1	10449245	ENSMUSG00000103810	predicted gene, 38005 [Source:MGI Symbol;Acc:MGI:5611233]	0	0	0	0	0	0	0	0	0	0	NA	NA	NA	NA	NA	no	0	NA	NA	NA	NA	NA	no	0	NA	NA	NA	NA	NA	no
Gm15604	1	10554098	ENSMUSG00000083422	predicted gene 15604 [Source:MGI Symbol;Acc:MGI:3783051]	1	0	2	0	1	0	0	3	2	0.865685	-0.296017	2.38332	-0.124203	0.901154	NA	no	0.865685	-1.1778	2.3915	-0.492495	0.622369	NA	no	0.865685	0.881786	2.39702	0.367867	0.712972	NA	no
Gm25253	1	10555554	ENSMUSG00000094979	predicted gene, 25253 [Source:MGI Symbol;Acc:MGI:5455030]	0	0	0	0	0	0	0	0	0	0	NA	NA	NA	NA	NA	no	0	NA	NA	NA	NA	NA	no	0	NA	NA	NA	NA	NA	no
Gm15603	1	10695123	ENSMUSG00000081417	predicted gene 15603 [Source:MGI Symbol;Acc:MGI:3783050]	0	0	0	0	0	0	0	0	0	0	NA	NA	NA	NA	NA	no	0	NA	NA	NA	NA	NA	no	0	NA	NA	NA	NA	NA	no
Gm37133	1	10782456	ENSMUSG00000103448	predicted gene, 37133 [Source:MGI Symbol;Acc:MGI:5610361]	0	0	0	0	0	0	0	0	0	0	NA	NA	NA	NA	NA	no	0	NA	NA	NA	NA	NA	no	0	NA	NA	NA	NA	NA	no
Gm5522	1	10805281	ENSMUSG00000100212	predicted gene 5522 [Source:MGI Symbol;Acc:MGI:3649087]	0	0	0	0	0	0	0	0	0	0	NA	NA	NA	NA	NA	no	0	NA	NA	NA	NA	NA	no	0	NA	NA	NA	NA	NA	no
Gm28659	1	10868688	ENSMUSG00000100648	predicted gene 28659 [Source:MGI Symbol;Acc:MGI:5579365]	1	0	0	0	1	2	0	0	0	0.386098	0.863238	2.40591	0.358799	0.719746	NA	no	0.386098	1.66961	2.40067	0.695475	0.486758	NA	no	0.386098	-0.80637	2.40067	-0.335893	0.736951	NA	no
Gm22963	1	10921670	ENSMUSG00000088585	predicted gene, 22963 [Source:MGI Symbol;Acc:MGI:5452740]	0	0	0	0	0	0	0	0	0	0	NA	NA	NA	NA	NA	no	0	NA	NA	NA	NA	NA	no	0	NA	NA	NA	NA	NA	no
Prex2	1	10993465	ENSMUSG00000048960	phosphatidylinositol-3,4,5-trisphosphate-dependent Rac exchange factor 2 [Source:MGI Symbol;Acc:MGI:1923385]	0	0	0	0	0	0	0	0	0	0	NA	NA	NA	NA	NA	no	0	NA	NA	NA	NA	NA	no	0	NA	NA	NA	NA	NA	no
Gm24173	1	11134111	ENSMUSG00000077318	predicted gene, 24173 [Source:MGI Symbol;Acc:MGI:5453950]	0	0	0	0	0	0	0	0	0	0	NA	NA	NA	NA	NA	no	0	NA	NA	NA	NA	NA	no	0	NA	NA	NA	NA	NA	no
Gm28686	1	11223566	ENSMUSG00000101827	predicted gene 28686 [Source:MGI Symbol;Acc:MGI:5579392]	0	0	0	0	0	0	0	0	0	0	NA	NA	NA	NA	NA	no	0	NA	NA	NA	NA	NA	no	0	NA	NA	NA	NA	NA	no
Gm37410	1	11363926	ENSMUSG00000103494	predicted gene, 37410 [Source:MGI Symbol;Acc:MGI:5610638]	0	0	0	0	0	0	0	0	0	0	NA	NA	NA	NA	NA	no	0	NA	NA	NA	NA	NA	no	0	NA	NA	NA	NA	NA	no
A830018L16Rik	1	11414105	ENSMUSG00000057715	RIKEN cDNA A830018L16 gene [Source:MGI Symbol;Acc:MGI:2444149]	0	0	0	0	0	0	0	0	0	0	NA	NA	NA	NA	NA	no	0	NA	NA	NA	NA	NA	no	0	NA	NA	NA	NA	NA	no
Gm38178	1	11416918	ENSMUSG00000103825	predicted gene, 38178 [Source:MGI Symbol;Acc:MGI:5611406]	0	0	0	0	0	0	0	0	0	0	NA	NA	NA	NA	NA	no	0	NA	NA	NA	NA	NA	no	0	NA	NA	NA	NA	NA	no
Gm29273	1	11608139	ENSMUSG00000099845	predicted gene 29273 [Source:MGI Symbol;Acc:MGI:5579979]	0	0	0	0	0	0	0	0	0	0	NA	NA	NA	NA	NA	no	0	NA	NA	NA	NA	NA	no	0	NA	NA	NA	NA	NA	no
Gm38069	1	11704207	ENSMUSG00000103561	predicted gene, 38069 [Source:MGI Symbol;Acc:MGI:5611297]	0	0	0	0	0	0	1	0	0	0.065138	-0.270919	2.40591	-0.112606	0.910343	NA	no	0.065138	-0.363204	2.40591	-0.150963	0.880005	NA	no	0.065138	0	2.40591	0	1	NA	no
Gm7560	1	12120960	ENSMUSG00000101610	predicted gene 7560 [Source:MGI Symbol;Acc:MGI:3648484]	0	0	0	0	0	0	0	0	0	0	NA	NA	NA	NA	NA	no	0	NA	NA	NA	NA	NA	no	0	NA	NA	NA	NA	NA	no
Gm22633	1	12374936	ENSMUSG00000093864	predicted gene, 22633 [Source:MGI Symbol;Acc:MGI:5452410]	0	0	1	0	1	3	2	3	2	1.06778	-1.49953	2.24621	-0.667584	0.504399	NA	no	1.06778	-0.413805	2.21511	-0.18681	0.85181	NA	no	1.06778	-1.08573	2.25647	-0.481162	0.630401	NA	no
Mir6341	1	12425986	ENSMUSG00000098555	microRNA 6341 [Source:MGI Symbol;Acc:MGI:5530644]	0	0	0	0	0	0	0	0	0	0	NA	NA	NA	NA	NA	no	0	NA	NA	NA	NA	NA	no	0	NA	NA	NA	NA	NA	no
Gm2383	1	12565577	ENSMUSG00000097628	predicted gene 2383 [Source:MGI Symbol;Acc:MGI:3780551]	0	0	0	0	0	0	0	0	0	0	NA	NA	NA	NA	NA	no	0	NA	NA	NA	NA	NA	no	0	NA	NA	NA	NA	NA	no
Gm6216	1	12655867	ENSMUSG00000098163	predicted gene 6216 [Source:MGI Symbol;Acc:MGI:3647030]	0	0	0	0	0	0	0	0	0	0	NA	NA	NA	NA	NA	no	0	NA	NA	NA	NA	NA	no	0	NA	NA	NA	NA	NA	no
Gm17644	1	12667563	ENSMUSG00000097171	predicted gene, 17644 [Source:MGI Symbol;Acc:MGI:4937278]	0	0	0	0	0	0	0	0	0	0	NA	NA	NA	NA	NA	no	0	NA	NA	NA	NA	NA	no	0	NA	NA	NA	NA	NA	no
Gm29663	1	12670324	ENSMUSG00000101314	predicted gene 29663 [Source:MGI Symbol;Acc:MGI:5580369]	0	0	0	0	0	0	0	0	0	0	NA	NA	NA	NA	NA	no	0	NA	NA	NA	NA	NA	no	0	NA	NA	NA	NA	NA	no
Sulf1	1	12692277	ENSMUSG00000016918	sulfatase 1 [Source:MGI Symbol;Acc:MGI:2138563]	0	0	0	0	0	0	0	0	0	0	NA	NA	NA	NA	NA	no	0	NA	NA	NA	NA	NA	no	0	NA	NA	NA	NA	NA	no
Slco5a1	1	12866549	ENSMUSG00000025938	solute carrier organic anion transporter family, member 5A1 [Source:MGI Symbol;Acc:MGI:2443431]	0	0	0	0	0	0	0	0	0	0	NA	NA	NA	NA	NA	no	0	NA	NA	NA	NA	NA	no	0	NA	NA	NA	NA	NA	no
Gm37162	1	13059401	ENSMUSG00000104518	predicted gene, 37162 [Source:MGI Symbol;Acc:MGI:5610390]	0	0	0	0	0	0	0	0	0	0	NA	NA	NA	NA	NA	no	0	NA	NA	NA	NA	NA	no	0	NA	NA	NA	NA	NA	no
Gm5250	1	13062025	ENSMUSG00000069620	predicted gene 5250 [Source:MGI Symbol;Acc:MGI:3647667]	0	0	0	0	0	0	0	0	0	0	NA	NA	NA	NA	NA	no	0	NA	NA	NA	NA	NA	no	0	NA	NA	NA	NA	NA	no
Gm29283	1	13068838	ENSMUSG00000099498	predicted gene 29283 [Source:MGI Symbol;Acc:MGI:5579989]	0	0	0	0	0	0	0	0	0	0	NA	NA	NA	NA	NA	no	0	NA	NA	NA	NA	NA	no	0	NA	NA	NA	NA	NA	no
Prdm14	1	13113457	ENSMUSG00000042414	PR domain containing 14 [Source:MGI Symbol;Acc:MGI:3588194]	0	0	0	0	0	0	0	0	0	0	NA	NA	NA	NA	NA	no	0	NA	NA	NA	NA	NA	no	0	NA	NA	NA	NA	NA	no
Ncoa2	1	13139105	ENSMUSG00000005886	nuclear receptor coactivator 2 [Source:MGI Symbol;Acc:MGI:1276533]	403	340	43	386	14	0	102	534	283	211.993	0.210018	1.58164	0.132785	0.894363	1	no	211.993	-0.726018	1.582	-0.458924	0.646289	1	no	211.993	0.936036	1.58209	0.591645	0.554089	1	no
Gm38376	1	13177462	ENSMUSG00000103506	predicted gene, 38376 [Source:MGI Symbol;Acc:MGI:5611604]	0	0	0	0	0	0	0	28	0	2.11186	-3.35804	2.38693	-1.40684	NA	NA	no	2.11186	-3.45032	2.38693	-1.44551	NA	NA	no	2.11186	0	2.40591	0	NA	NA	no
Gm37409	1	13234809	ENSMUSG00000103495	predicted gene, 37409 [Source:MGI Symbol;Acc:MGI:5610637]	0	0	0	0	0	0	0	0	0	0	NA	NA	NA	NA	NA	no	0	NA	NA	NA	NA	NA	no	0	NA	NA	NA	NA	NA	no
Gm27881	1	13262198	ENSMUSG00000099183	predicted gene, 27881 [Source:MGI Symbol;Acc:MGI:5531263]	0	0	0	0	0	0	0	0	0	0	NA	NA	NA	NA	NA	no	0	NA	NA	NA	NA	NA	no	0	NA	NA	NA	NA	NA	no
Gm38223	1	13289812	ENSMUSG00000102639	predicted gene, 38223 [Source:MGI Symbol;Acc:MGI:5611451]	0	0	0	0	0	0	0	0	0	0	NA	NA	NA	NA	NA	no	0	NA	NA	NA	NA	NA	no	0	NA	NA	NA	NA	NA	no
Gm37702	1	13297036	ENSMUSG00000104170	predicted gene, 37702 [Source:MGI Symbol;Acc:MGI:5610930]	0	0	0	0	0	11	0	0	0	1.01791	0	2.40591	0	1	NA	no	1.01791	2.93384	2.39075	1.22716	0.219762	NA	no	1.01791	-2.63768	2.39075	-1.10328	0.269903	NA	no
Gm23169	1	13334498	ENSMUSG00000087782	predicted gene, 23169 [Source:MGI Symbol;Acc:MGI:5452946]	0	0	0	0	0	0	0	0	0	0	NA	NA	NA	NA	NA	no	0	NA	NA	NA	NA	NA	no	0	NA	NA	NA	NA	NA	no
Gm38120	1	13343563	ENSMUSG00000103085	predicted gene, 38120 [Source:MGI Symbol;Acc:MGI:5611348]	0	0	0	0	63	0	0	137	22	19.4438	-3.83712	2.36732	-1.62087	0.105046	0.637287	no	19.4438	-0.653408	2.35898	-0.276987	0.78179	1	no	19.4438	-3.18371	2.36776	-1.34461	0.178752	0.91165	no
Gm38380	1	13354483	ENSMUSG00000102664	predicted gene, 38380 [Source:MGI Symbol;Acc:MGI:5611608]	94	0	0	72	105	66	0	433	0	66.6946	-1.35723	2.17482	-0.624066	NA	NA	no	66.6946	-0.279474	2.17412	-0.128546	NA	NA	no	66.6946	-1.07776	2.17499	-0.495522	NA	NA	no
Gm29570	1	13376070	ENSMUSG00000101476	predicted gene 29570 [Source:MGI Symbol;Acc:MGI:5580276]	0	0	0	0	0	0	0	0	0	0	NA	NA	NA	NA	NA	no	0	NA	NA	NA	NA	NA	no	0	NA	NA	NA	NA	NA	no
Gm7593	1	13407012	ENSMUSG00000101171	predicted gene 7593 [Source:MGI Symbol;Acc:MGI:3647262]	0	0	0	0	0	0	0	0	0	0	NA	NA	NA	NA	NA	no	0	NA	NA	NA	NA	NA	no	0	NA	NA	NA	NA	NA	no
Tram1	1	13564698	ENSMUSG00000025935	translocating chain-associating membrane protein 1 [Source:MGI Symbol;Acc:MGI:1919515]	308	410	958	546	68	554	29	96	221	345.532	2.43242	1.09327	2.22489	0.0260883	0.314054	no	345.532	1.74918	1.09347	1.59966	0.109675	0.736169	no	345.532	0.683236	1.09213	0.625601	0.531577	1	no
Lactb2	1	13623330	ENSMUSG00000025937	lactamase, beta 2 [Source:MGI Symbol;Acc:MGI:2442551]	66	130	18	58	0	0	0	2	20	35.3653	2.81526	1.97687	1.4241	0.154417	0.753911	no	35.3653	1.12656	1.97886	0.569298	0.569154	1	no	35.3653	1.68869	1.97455	0.855227	0.392425	1	no
Gm38319	1	13641483	ENSMUSG00000102982	predicted gene, 38319 [Source:MGI Symbol;Acc:MGI:5611547]	0	0	0	0	0	0	1	0	0	0.065138	-0.270919	2.40591	-0.112606	0.910343	NA	no	0.065138	-0.363204	2.40591	-0.150963	0.880005	NA	no	0.065138	0	2.40591	0	1	NA	no
Xkr9	1	13668771	ENSMUSG00000067813	X-linked Kx blood group related 9 [Source:MGI Symbol;Acc:MGI:2686466]	0	0	0	0	0	0	0	0	0	0	NA	NA	NA	NA	NA	no	0	NA	NA	NA	NA	NA	no	0	NA	NA	NA	NA	NA	no
Gm26273	1	13774334	ENSMUSG00000077368	predicted gene, 26273 [Source:MGI Symbol;Acc:MGI:5456050]	0	0	0	0	0	0	0	0	0	0	NA	NA	NA	NA	NA	no	0	NA	NA	NA	NA	NA	no	0	NA	NA	NA	NA	NA	no
Gm5523	1	13785883	ENSMUSG00000097711	predicted pseudogene 5523 [Source:MGI Symbol;Acc:MGI:3649089]	0	0	1	0	0	0	0	0	0	0.111927	0.863238	2.40591	0.358799	0.719746	NA	no	0.111927	0	2.40591	0	1	NA	no	0.111927	0.659364	2.40591	0.27406	0.784039	NA	no
Gm36947	1	13846871	ENSMUSG00000102166	predicted gene, 36947 [Source:MGI Symbol;Acc:MGI:5610175]	0	0	0	0	0	0	0	0	0	0	NA	NA	NA	NA	NA	no	0	NA	NA	NA	NA	NA	no	0	NA	NA	NA	NA	NA	no
Gm25491	1	13932378	ENSMUSG00000089358	predicted gene, 25491 [Source:MGI Symbol;Acc:MGI:5455268]	0	0	0	0	0	0	0	0	0	0	NA	NA	NA	NA	NA	no	0	NA	NA	NA	NA	NA	no	0	NA	NA	NA	NA	NA	no
Gm37400	1	14109215	ENSMUSG00000104209	predicted gene, 37400 [Source:MGI Symbol;Acc:MGI:5610628]	0	0	0	0	0	0	0	0	0	0	NA	NA	NA	NA	NA	no	0	NA	NA	NA	NA	NA	no	0	NA	NA	NA	NA	NA	no
Eya1	1	14168954	ENSMUSG00000025932	EYA transcriptional coactivator and phosphatase 1 [Source:MGI Symbol;Acc:MGI:109344]	0	0	0	0	0	0	0	0	0	0	NA	NA	NA	NA	NA	no	0	NA	NA	NA	NA	NA	no	0	NA	NA	NA	NA	NA	no
Gm22616	1	14182578	ENSMUSG00000095853	predicted gene, 22616 [Source:MGI Symbol;Acc:MGI:5452393]	0	0	0	0	0	0	0	0	0	0	NA	NA	NA	NA	NA	no	0	NA	NA	NA	NA	NA	no	0	NA	NA	NA	NA	NA	no
Gm37444	1	14255552	ENSMUSG00000102588	predicted gene, 37444 [Source:MGI Symbol;Acc:MGI:5610672]	0	0	0	0	0	0	0	0	0	0	NA	NA	NA	NA	NA	no	0	NA	NA	NA	NA	NA	no	0	NA	NA	NA	NA	NA	no
Gm9947	1	14752937	ENSMUSG00000054493	predicted gene 9947 [Source:MGI Symbol;Acc:MGI:3642739]	0	0	0	0	0	0	0	0	0	0	NA	NA	NA	NA	NA	no	0	NA	NA	NA	NA	NA	no	0	NA	NA	NA	NA	NA	no
Msc	1	14753346	ENSMUSG00000025930	musculin [Source:MGI Symbol;Acc:MGI:1333884]	0	0	0	0	0	0	0	0	0	0	NA	NA	NA	NA	NA	no	0	NA	NA	NA	NA	NA	no	0	NA	NA	NA	NA	NA	no
Gm37412	1	14788645	ENSMUSG00000103492	predicted gene, 37412 [Source:MGI Symbol;Acc:MGI:5610640]	0	0	0	0	0	0	0	0	0	0	NA	NA	NA	NA	NA	no	0	NA	NA	NA	NA	NA	no	0	NA	NA	NA	NA	NA	no
Smt3h2-ps4	1	14839869	ENSMUSG00000081201	SMT3 suppressor of mif two 3 homolog 2, pseudogene 4 (S. cerevisiae) [Source:MGI Symbol;Acc:MGI:2149598]	0	0	0	0	0	0	0	0	0	0	NA	NA	NA	NA	NA	no	0	NA	NA	NA	NA	NA	no	0	NA	NA	NA	NA	NA	no
Rpl5-ps1	1	14865072	ENSMUSG00000082193	ribosomal protein L5, pseudogene 1 [Source:MGI Symbol;Acc:MGI:3647110]	1	11	1	107	1	0	1	0	0	13.6179	3.05152	2.08504	1.46353	NA	NA	no	13.6179	5.30212	2.07607	2.55392	NA	NA	no	13.6179	-2.2506	2.02179	-1.11317	NA	NA	no
Trpa1	1	14872648	ENSMUSG00000032769	transient receptor potential cation channel, subfamily A, member 1 [Source:MGI Symbol;Acc:MGI:3522699]	0	0	0	0	0	0	0	0	0	0	NA	NA	NA	NA	NA	no	0	NA	NA	NA	NA	NA	no	0	NA	NA	NA	NA	NA	no
Gm26345	1	15019040	ENSMUSG00000088159	predicted gene, 26345 [Source:MGI Symbol;Acc:MGI:5456122]	0	0	0	0	0	0	0	0	0	0	NA	NA	NA	NA	NA	no	0	NA	NA	NA	NA	NA	no	0	NA	NA	NA	NA	NA	no
Gm10566	1	15268802	ENSMUSG00000073737	predicted gene 10566 [Source:MGI Symbol;Acc:MGI:3642220]	0	0	0	0	0	0	0	0	0	0	NA	NA	NA	NA	NA	no	0	NA	NA	NA	NA	NA	no	0	NA	NA	NA	NA	NA	no
Kcnb2	1	15287254	ENSMUSG00000092083	potassium voltage gated channel, Shab-related subfamily, member 2 [Source:MGI Symbol;Acc:MGI:99632]	0	0	0	0	0	0	0	0	0	0	NA	NA	NA	NA	NA	no	0	NA	NA	NA	NA	NA	no	0	NA	NA	NA	NA	NA	no
Gm38116	1	15364302	ENSMUSG00000102937	predicted gene, 38116 [Source:MGI Symbol;Acc:MGI:5611344]	0	0	0	0	0	0	0	0	0	0	NA	NA	NA	NA	NA	no	0	NA	NA	NA	NA	NA	no	0	NA	NA	NA	NA	NA	no
Gm37138	1	15556249	ENSMUSG00000104149	predicted gene, 37138 [Source:MGI Symbol;Acc:MGI:5610366]	0	0	0	0	0	0	0	0	0	0	NA	NA	NA	NA	NA	no	0	NA	NA	NA	NA	NA	no	0	NA	NA	NA	NA	NA	no
Gm25227	1	15685935	ENSMUSG00000088829	predicted gene, 25227 [Source:MGI Symbol;Acc:MGI:5455004]	0	0	0	0	0	0	0	0	0	0	NA	NA	NA	NA	NA	no	0	NA	NA	NA	NA	NA	no	0	NA	NA	NA	NA	NA	no
Gm25168	1	15757832	ENSMUSG00000077377	predicted gene, 25168 [Source:MGI Symbol;Acc:MGI:5454945]	0	0	0	0	0	0	0	0	0	0	NA	NA	NA	NA	NA	no	0	NA	NA	NA	NA	NA	no	0	NA	NA	NA	NA	NA	no
Gm6060	1	15760122	ENSMUSG00000101652	predicted gene 6060 [Source:MGI Symbol;Acc:MGI:3648622]	0	0	1	0	3	0	0	0	2	0.647936	-0.425272	2.39749	-0.177382	0.859208	NA	no	0.647936	0.391532	2.38892	0.163895	0.869814	NA	no	0.647936	-0.816804	2.3969	-0.340775	0.733273	NA	no
Gm28669	1	15760761	ENSMUSG00000100814	predicted gene 28669 [Source:MGI Symbol;Acc:MGI:5579375]	0	0	0	0	0	0	0	0	0	0	NA	NA	NA	NA	NA	no	0	NA	NA	NA	NA	NA	no	0	NA	NA	NA	NA	NA	no
Terf1	1	15805646	ENSMUSG00000025925	telomeric repeat binding factor 1 [Source:MGI Symbol;Acc:MGI:109634]	244	343	0	211	0	93	95	85	79	124.496	1.5059	1.7439	0.863523	0.38785	0.968497	no	124.496	0.493981	1.74432	0.283193	0.777029	1	no	124.496	1.01192	1.74377	0.580302	0.561711	1	no
Gm37509	1	15853331	ENSMUSG00000104379	predicted gene, 37509 [Source:MGI Symbol;Acc:MGI:5610737]	0	0	0	0	0	0	0	0	0	0	NA	NA	NA	NA	NA	no	0	NA	NA	NA	NA	NA	no	0	NA	NA	NA	NA	NA	no
Sbspon	1	15853862	ENSMUSG00000032719	somatomedin B and thrombospondin, type 1 domain containing [Source:MGI Symbol;Acc:MGI:2684952]	0	0	0	0	0	0	0	0	0	0	NA	NA	NA	NA	NA	no	0	NA	NA	NA	NA	NA	no	0	NA	NA	NA	NA	NA	no
Gm23259	1	15879530	ENSMUSG00000088943	predicted gene, 23259 [Source:MGI Symbol;Acc:MGI:5453036]	0	0	0	0	0	0	0	0	0	0	NA	NA	NA	NA	NA	no	0	NA	NA	NA	NA	NA	no	0	NA	NA	NA	NA	NA	no
Gm7634	1	16053335	ENSMUSG00000100652	predicted gene 7634 [Source:MGI Symbol;Acc:MGI:3644198]	1	0	0	0	0	0	0	0	2	0.308403	-0.471937	2.40108	-0.196552	0.844178	NA	no	0.308403	-1.1313	2.40108	-0.471164	0.637524	NA	no	0.308403	0.659364	2.40591	0.27406	0.784039	NA	no
4930444P10Rik	1	16065979	ENSMUSG00000067795	RIKEN cDNA 4930444P10 gene [Source:MGI Symbol;Acc:MGI:1923049]	0	0	0	0	0	0	0	0	0	0	NA	NA	NA	NA	NA	no	0	NA	NA	NA	NA	NA	no	0	NA	NA	NA	NA	NA	no
Rpl7	1	16101295	ENSMUSG00000043716	ribosomal protein L7 [Source:MGI Symbol;Acc:MGI:98073]	2455	2235	2088	2793	4799	2058	7494	3586	2641	2834.02	-0.405558	0.636766	-0.636903	0.524188	0.99208	no	2834.02	-0.0450849	0.636696	-0.0708107	0.943548	1	no	2834.02	-0.360474	0.636801	-0.56607	0.571346	1	no
Rdh10	1	16105774	ENSMUSG00000025921	retinol dehydrogenase 10 (all-trans) [Source:MGI Symbol;Acc:MGI:1924238]	165	0	0	0	51	0	0	237	0	38.8284	-0.136431	2.35818	-0.0578542	NA	NA	no	38.8284	-1.05248	2.35844	-0.446262	NA	NA	no	38.8284	0.916052	2.35858	0.388392	NA	NA	no
Gm38249	1	16208197	ENSMUSG00000104165	predicted gene, 38249 [Source:MGI Symbol;Acc:MGI:5611477]	0	0	0	0	0	0	0	0	0	0	NA	NA	NA	NA	NA	no	0	NA	NA	NA	NA	NA	no	0	NA	NA	NA	NA	NA	no
Gm28095	1	16228506	ENSMUSG00000100868	predicted gene 28095 [Source:MGI Symbol;Acc:MGI:5578801]	0	0	0	0	0	0	0	0	0	0	NA	NA	NA	NA	NA	no	0	NA	NA	NA	NA	NA	no	0	NA	NA	NA	NA	NA	no
Stau2	1	16228674	ENSMUSG00000025920	staufen (RNA binding protein) homolog 2 (Drosophila) [Source:MGI Symbol;Acc:MGI:1352508]	3	0	0	1	0	0	0	0	0	0.390681	1.65897	2.40265	0.690473	0.489897	NA	no	0.390681	0.770953	2.40591	0.320441	0.748634	NA	no	0.390681	0.888015	2.40265	0.369597	0.711682	NA	no
Gm7568	1	16253592	ENSMUSG00000089982	predicted gene 7568 [Source:MGI Symbol;Acc:MGI:3649156]	0	0	0	0	0	0	0	0	0	0	NA	NA	NA	NA	NA	no	0	NA	NA	NA	NA	NA	no	0	NA	NA	NA	NA	NA	no
Ube2w	1	16540790	ENSMUSG00000025939	ubiquitin-conjugating enzyme E2W (putative) [Source:MGI Symbol;Acc:MGI:1914049]	0	1	50	0	0	53	2	14	2	12.0441	1.49986	2.12106	0.707127	NA	NA	no	12.0441	1.32652	2.12106	0.625405	NA	NA	no	12.0441	0.173336	2.11789	0.0818439	NA	NA	no
Gm38342	1	16618560	ENSMUSG00000102457	predicted gene, 38342 [Source:MGI Symbol;Acc:MGI:5611570]	0	0	0	0	0	0	0	0	0	0	NA	NA	NA	NA	NA	no	0	NA	NA	NA	NA	NA	no	0	NA	NA	NA	NA	NA	no
Eloc	1	16641725	ENSMUSG00000079658	elongin C [Source:MGI Symbol;Acc:MGI:1915173]	50	332	29	50	206	73	2	48	49	98.5588	2.40904	1.32149	1.82296	NA	NA	no	98.5588	1.77331	1.32197	1.34142	NA	NA	no	98.5588	0.635728	1.31849	0.482165	NA	NA	no
D030040B21Rik	1	16657552	ENSMUSG00000097744	RIKEN cDNA D030040B21 gene [Source:MGI Symbol;Acc:MGI:4437728]	0	0	0	0	0	0	0	0	0	0	NA	NA	NA	NA	NA	no	0	NA	NA	NA	NA	NA	no	0	NA	NA	NA	NA	NA	no
Gm7654	1	16662980	ENSMUSG00000100959	predicted gene 7654 [Source:MGI Symbol;Acc:MGI:3648037]	0	0	0	0	0	0	0	0	0	0	NA	NA	NA	NA	NA	no	0	NA	NA	NA	NA	NA	no	0	NA	NA	NA	NA	NA	no
Tmem70	1	16665207	ENSMUSG00000025940	transmembrane protein 70 [Source:MGI Symbol;Acc:MGI:1915068]	204	195	281	143	151	6	0	83	137	131.69	1.7077	1.49372	1.14325	0.252934	0.884243	no	131.69	0.559151	1.4944	0.374164	0.708283	1	no	131.69	1.14855	1.49347	0.769047	0.441865	1	no
Ly96	1	16688051	ENSMUSG00000025779	lymphocyte antigen 96 [Source:MGI Symbol;Acc:MGI:1341909]	2	2	0	0	0	0	0	0	0	0.472849	2.1571	2.39808	0.899513	0.368379	NA	no	0.472849	0	2.40591	0	1	NA	no	0.472849	1.95323	2.39808	0.814497	0.41536	NA	no
Gm29649	1	16758205	ENSMUSG00000100093	predicted gene 29649 [Source:MGI Symbol;Acc:MGI:5580355]	0	0	0	0	0	0	0	0	0	0	NA	NA	NA	NA	NA	no	0	NA	NA	NA	NA	NA	no	0	NA	NA	NA	NA	NA	no
Gm5828	1	16768279	ENSMUSG00000091020	predicted gene 5828 [Source:MGI Symbol;Acc:MGI:3644176]	0	0	0	0	0	0	0	0	0	0	NA	NA	NA	NA	NA	no	0	NA	NA	NA	NA	NA	no	0	NA	NA	NA	NA	NA	no
Gm28376	1	16898185	ENSMUSG00000101640	predicted gene 28376 [Source:MGI Symbol;Acc:MGI:5579082]	0	0	0	0	0	0	0	0	0	0	NA	NA	NA	NA	NA	no	0	NA	NA	NA	NA	NA	no	0	NA	NA	NA	NA	NA	no
4921511E07Rik	1	16930970	ENSMUSG00000104133	RIKEN cDNA 4921511E07 gene [Source:MGI Symbol;Acc:MGI:1918145]	0	0	0	0	0	0	0	0	0	0	NA	NA	NA	NA	NA	no	0	NA	NA	NA	NA	NA	no	0	NA	NA	NA	NA	NA	no
Jph1	1	16964560	ENSMUSG00000042686	junctophilin 1 [Source:MGI Symbol;Acc:MGI:1891495]	0	0	0	0	0	0	1	0	0	0.065138	-0.270919	2.40591	-0.112606	0.910343	NA	no	0.065138	-0.363204	2.40591	-0.150963	0.880005	NA	no	0.065138	0	2.40591	0	1	NA	no
Gm28783	1	17124747	ENSMUSG00000100110	predicted gene 28783 [Source:MGI Symbol;Acc:MGI:5579489]	0	0	0	0	0	0	0	0	0	0	NA	NA	NA	NA	NA	no	0	NA	NA	NA	NA	NA	no	0	NA	NA	NA	NA	NA	no
Gdap1	1	17145362	ENSMUSG00000025777	ganglioside-induced differentiation-associated-protein 1 [Source:MGI Symbol;Acc:MGI:1338002]	0	1	0	1	0	0	0	0	0	0.251639	0.863238	2.40591	0.358799	0.719746	NA	no	0.251639	0.770953	2.40591	0.320441	0.748634	NA	no	0.251639	0.0922849	2.40591	0.0383576	0.969403	NA	no
Gm28784	1	17168403	ENSMUSG00000099899	predicted gene 28784 [Source:MGI Symbol;Acc:MGI:5579490]	0	0	0	0	0	0	0	0	0	0	NA	NA	NA	NA	NA	no	0	NA	NA	NA	NA	NA	no	0	NA	NA	NA	NA	NA	no
Gm28785	1	17250114	ENSMUSG00000100272	predicted gene 28785 [Source:MGI Symbol;Acc:MGI:5579491]	0	0	0	0	0	0	0	0	0	0	NA	NA	NA	NA	NA	no	0	NA	NA	NA	NA	NA	no	0	NA	NA	NA	NA	NA	no
Gm5251	1	17394958	ENSMUSG00000100398	predicted gene 5251 [Source:MGI Symbol;Acc:MGI:3647666]	0	0	0	0	0	0	0	0	0	0	NA	NA	NA	NA	NA	no	0	NA	NA	NA	NA	NA	no	0	NA	NA	NA	NA	NA	no
Rbm6-ps1	1	17397412	ENSMUSG00000101589	RNA binding motif protein 6, pseudogene 1 [Source:MGI Symbol;Acc:MGI:1889580]	0	0	1	13	0	10	0	0	0	2.45535	0.905933	2.40441	0.37678	0.706337	NA	no	2.45535	3.7193	2.38722	1.558	0.119233	NA	no	2.45535	-2.81336	2.38543	-1.17939	0.238241	NA	no
Gm6075	1	17429043	ENSMUSG00000102048	predicted gene 6075 [Source:MGI Symbol;Acc:MGI:3648507]	2	0	0	0	0	0	0	0	0	0.187733	1.38527	2.40553	0.575869	0.564704	NA	no	0.187733	0	2.40591	0	1	NA	no	0.187733	1.18139	2.40553	0.491116	0.623344	NA	no
Gm25166	1	17520001	ENSMUSG00000089534	predicted gene, 25166 [Source:MGI Symbol;Acc:MGI:5454943]	0	0	0	0	0	0	0	0	0	0	NA	NA	NA	NA	NA	no	0	NA	NA	NA	NA	NA	no	0	NA	NA	NA	NA	NA	no
Pi15	1	17601901	ENSMUSG00000067780	peptidase inhibitor 15 [Source:MGI Symbol;Acc:MGI:1934659]	0	0	0	0	0	0	0	0	0	0	NA	NA	NA	NA	NA	no	0	NA	NA	NA	NA	NA	no	0	NA	NA	NA	NA	NA	no
Gm28154	1	17615084	ENSMUSG00000100053	predicted gene 28154 [Source:MGI Symbol;Acc:MGI:5578860]	0	0	0	0	0	0	0	0	0	0	NA	NA	NA	NA	NA	no	0	NA	NA	NA	NA	NA	no	0	NA	NA	NA	NA	NA	no
Gm16070	1	17676027	ENSMUSG00000085125	predicted gene 16070 [Source:MGI Symbol;Acc:MGI:3801761]	0	0	0	0	0	0	0	0	0	0	NA	NA	NA	NA	NA	no	0	NA	NA	NA	NA	NA	no	0	NA	NA	NA	NA	NA	no
Crispld1	1	17727045	ENSMUSG00000025776	cysteine-rich secretory protein LCCL domain containing 1 [Source:MGI Symbol;Acc:MGI:1934666]	0	0	0	0	0	0	0	0	0	0	NA	NA	NA	NA	NA	no	0	NA	NA	NA	NA	NA	no	0	NA	NA	NA	NA	NA	no
Gm28153	1	17741915	ENSMUSG00000099895	predicted gene 28153 [Source:MGI Symbol;Acc:MGI:5578859]	0	0	0	0	0	0	0	0	0	0	NA	NA	NA	NA	NA	no	0	NA	NA	NA	NA	NA	no	0	NA	NA	NA	NA	NA	no
Gm7690	1	17947041	ENSMUSG00000100554	predicted gene 7690 [Source:MGI Symbol;Acc:MGI:3648169]	0	0	0	0	0	0	0	0	0	0	NA	NA	NA	NA	NA	no	0	NA	NA	NA	NA	NA	no	0	NA	NA	NA	NA	NA	no
Gm18775	1	17993010	ENSMUSG00000099473	predicted gene, 18775 [Source:MGI Symbol;Acc:MGI:5010960]	0	0	0	0	0	0	0	0	0	0	NA	NA	NA	NA	NA	no	0	NA	NA	NA	NA	NA	no	0	NA	NA	NA	NA	NA	no
Gm17969	1	17993813	ENSMUSG00000099591	predicted gene, 17969 [Source:MGI Symbol;Acc:MGI:5010154]	0	0	0	0	0	0	0	0	0	0	NA	NA	NA	NA	NA	no	0	NA	NA	NA	NA	NA	no	0	NA	NA	NA	NA	NA	no
Gm28756	1	17994462	ENSMUSG00000109887	predicted gene 28756 [Source:MGI Symbol;Acc:MGI:5579462]	0	0	0	0	0	0	0	0	0	0	NA	NA	NA	NA	NA	no	0	NA	NA	NA	NA	NA	no	0	NA	NA	NA	NA	NA	no
Gm28755	1	18005961	ENSMUSG00000102001	predicted gene 28755 [Source:MGI Symbol;Acc:MGI:5579461]	0	0	0	0	0	0	0	0	0	0	NA	NA	NA	NA	NA	no	0	NA	NA	NA	NA	NA	no	0	NA	NA	NA	NA	NA	no
Gm45784	1	18048100	ENSMUSG00000101717	predicted gene 45784 [Source:MGI Symbol;Acc:MGI:5804899]	0	0	0	0	0	0	0	0	0	0	NA	NA	NA	NA	NA	no	0	NA	NA	NA	NA	NA	no	0	NA	NA	NA	NA	NA	no
Crisp4	1	18115191	ENSMUSG00000025774	cysteine-rich secretory protein 4 [Source:MGI Symbol;Acc:MGI:1925331]	0	0	0	0	0	0	0	0	0	0	NA	NA	NA	NA	NA	no	0	NA	NA	NA	NA	NA	no	0	NA	NA	NA	NA	NA	no
Defb44-ps	1	18210053	ENSMUSG00000070977	defensin beta 44, pseudogene [Source:MGI Symbol;Acc:MGI:3646526]	0	0	0	0	0	0	0	0	0	0	NA	NA	NA	NA	NA	no	0	NA	NA	NA	NA	NA	no	0	NA	NA	NA	NA	NA	no
Defb18	1	18236473	ENSMUSG00000073735	defensin beta 18 [Source:MGI Symbol;Acc:MGI:3648148]	0	0	0	0	0	0	0	0	0	0	NA	NA	NA	NA	NA	no	0	NA	NA	NA	NA	NA	no	0	NA	NA	NA	NA	NA	no
Defb41	1	18250980	ENSMUSG00000067773	defensin beta 41 [Source:MGI Symbol;Acc:MGI:1924923]	0	0	0	0	0	0	0	0	0	0	NA	NA	NA	NA	NA	no	0	NA	NA	NA	NA	NA	no	0	NA	NA	NA	NA	NA	no
Gm17837	1	18262395	ENSMUSG00000101685	predicted gene, 17837 [Source:MGI Symbol;Acc:MGI:5010022]	0	0	0	0	0	1	1	0	0	0.157675	-0.270919	2.40591	-0.112606	0.910343	NA	no	0.157675	0.203875	2.40591	0.0847391	0.932469	NA	no	0.157675	-0.474794	2.40591	-0.197345	0.843558	NA	no
Gm5252	1	18708428	ENSMUSG00000101306	predicted gene 5252 [Source:MGI Symbol;Acc:MGI:3647664]	0	0	0	0	0	0	0	0	0	0	NA	NA	NA	NA	NA	no	0	NA	NA	NA	NA	NA	no	0	NA	NA	NA	NA	NA	no
Gm24075	1	18969762	ENSMUSG00000088800	predicted gene, 24075 [Source:MGI Symbol;Acc:MGI:5453852]	0	0	0	0	0	0	0	0	0	0	NA	NA	NA	NA	NA	no	0	NA	NA	NA	NA	NA	no	0	NA	NA	NA	NA	NA	no
Gm28343	1	19037266	ENSMUSG00000101644	predicted gene 28343 [Source:MGI Symbol;Acc:MGI:5579049]	0	0	0	0	0	0	0	0	0	0	NA	NA	NA	NA	NA	no	0	NA	NA	NA	NA	NA	no	0	NA	NA	NA	NA	NA	no
Gm28344	1	19062857	ENSMUSG00000099433	predicted gene 28344 [Source:MGI Symbol;Acc:MGI:5579050]	0	1	0	0	1	0	0	0	0	0.249715	0.863238	2.40591	0.358799	0.719746	NA	no	0.249715	0.770953	2.40591	0.320441	0.748634	NA	no	0.249715	0.0922849	2.40591	0.0383576	0.969403	NA	no
Gm15825	1	19063300	ENSMUSG00000089787	predicted gene 15825 [Source:MGI Symbol;Acc:MGI:3801887]	0	0	0	0	0	0	0	0	0	0	NA	NA	NA	NA	NA	no	0	NA	NA	NA	NA	NA	no	0	NA	NA	NA	NA	NA	no
Tfap2d	1	19103022	ENSMUSG00000042596	transcription factor AP-2, delta [Source:MGI Symbol;Acc:MGI:2153466]	0	0	0	0	0	0	0	0	0	0	NA	NA	NA	NA	NA	no	0	NA	NA	NA	NA	NA	no	0	NA	NA	NA	NA	NA	no
Gm10075	1	19153422	ENSMUSG00000100720	predicted gene 10075 [Source:MGI Symbol;Acc:MGI:3710521]	0	0	0	0	0	0	0	0	0	0	NA	NA	NA	NA	NA	no	0	NA	NA	NA	NA	NA	no	0	NA	NA	NA	NA	NA	no
Tfap2b	1	19208914	ENSMUSG00000025927	transcription factor AP-2 beta [Source:MGI Symbol;Acc:MGI:104672]	0	0	0	0	0	0	0	0	0	0	NA	NA	NA	NA	NA	no	0	NA	NA	NA	NA	NA	no	0	NA	NA	NA	NA	NA	no
Gm28340	1	19242725	ENSMUSG00000100538	predicted gene 28340 [Source:MGI Symbol;Acc:MGI:5579046]	0	0	0	0	0	0	0	0	0	0	NA	NA	NA	NA	NA	no	0	NA	NA	NA	NA	NA	no	0	NA	NA	NA	NA	NA	no
Gm28341	1	19320226	ENSMUSG00000101117	predicted gene 28341 [Source:MGI Symbol;Acc:MGI:5579047]	0	0	0	0	0	0	0	0	0	0	NA	NA	NA	NA	NA	no	0	NA	NA	NA	NA	NA	no	0	NA	NA	NA	NA	NA	no
Gm4849	1	19330939	ENSMUSG00000100204	predicted gene 4849 [Source:MGI Symbol;Acc:MGI:3645366]	0	0	0	0	0	0	0	0	0	0	NA	NA	NA	NA	NA	no	0	NA	NA	NA	NA	NA	no	0	NA	NA	NA	NA	NA	no
Gm24633	1	19513855	ENSMUSG00000084668	predicted gene, 24633 [Source:MGI Symbol;Acc:MGI:5454410]	0	0	0	0	0	0	0	0	0	0	NA	NA	NA	NA	NA	no	0	NA	NA	NA	NA	NA	no	0	NA	NA	NA	NA	NA	no
Gm38382	1	19614269	ENSMUSG00000102597	predicted gene, 38382 [Source:MGI Symbol;Acc:MGI:5611610]	0	0	0	0	0	0	0	0	0	0	NA	NA	NA	NA	NA	no	0	NA	NA	NA	NA	NA	no	0	NA	NA	NA	NA	NA	no
Pkhd1	1	20057779	ENSMUSG00000043760	polycystic kidney and hepatic disease 1 [Source:MGI Symbol;Acc:MGI:2155808]	0	0	0	0	0	0	0	0	0	0	NA	NA	NA	NA	NA	no	0	NA	NA	NA	NA	NA	no	0	NA	NA	NA	NA	NA	no
Gm37315	1	20062070	ENSMUSG00000104095	predicted gene, 37315 [Source:MGI Symbol;Acc:MGI:5610543]	0	0	0	0	0	0	0	0	0	0	NA	NA	NA	NA	NA	no	0	NA	NA	NA	NA	NA	no	0	NA	NA	NA	NA	NA	no
4930486I03Rik	1	20356452	ENSMUSG00000089914	RIKEN cDNA 4930486I03 gene [Source:MGI Symbol;Acc:MGI:1922278]	0	0	0	0	0	0	0	0	0	0	NA	NA	NA	NA	NA	no	0	NA	NA	NA	NA	NA	no	0	NA	NA	NA	NA	NA	no
Gm15795	1	20444258	ENSMUSG00000090142	predicted gene 15795 [Source:MGI Symbol;Acc:MGI:3802035]	1	2	1	3	2	0	0	0	4	1.46154	0.149099	2.25106	0.0662352	0.947191	NA	no	1.46154	0.252546	2.24743	0.112371	0.910529	NA	no	1.46154	-0.103447	2.25187	-0.0459383	0.963359	NA	no
Gm24162	1	20444811	ENSMUSG00000070175	predicted gene, 24162 [Source:MGI Symbol;Acc:MGI:5453939]	0	0	0	0	0	0	0	0	0	0	NA	NA	NA	NA	NA	no	0	NA	NA	NA	NA	NA	no	0	NA	NA	NA	NA	NA	no
Mir206	1	20679010	ENSMUSG00000065559	microRNA 206 [Source:MGI Symbol;Acc:MGI:2676881]	0	0	0	0	0	0	0	0	0	0	NA	NA	NA	NA	NA	no	0	NA	NA	NA	NA	NA	no	0	NA	NA	NA	NA	NA	no
Gm28653	1	20679023	ENSMUSG00000099906	predicted gene 28653 [Source:MGI Symbol;Acc:MGI:5579359]	0	0	0	0	0	0	0	0	0	0	NA	NA	NA	NA	NA	no	0	NA	NA	NA	NA	NA	no	0	NA	NA	NA	NA	NA	no
Mir133b	1	20682769	ENSMUSG00000065480	microRNA 133b [Source:MGI Symbol;Acc:MGI:3618720]	0	0	0	0	0	0	0	0	0	0	NA	NA	NA	NA	NA	no	0	NA	NA	NA	NA	NA	no	0	NA	NA	NA	NA	NA	no
Il17a	1	20730905	ENSMUSG00000025929	interleukin 17A [Source:MGI Symbol;Acc:MGI:107364]	0	0	0	0	0	0	0	0	0	0	NA	NA	NA	NA	NA	no	0	NA	NA	NA	NA	NA	no	0	NA	NA	NA	NA	NA	no
Il17f	1	20777146	ENSMUSG00000041872	interleukin 17F [Source:MGI Symbol;Acc:MGI:2676631]	0	0	0	0	0	0	0	0	0	0	NA	NA	NA	NA	NA	no	0	NA	NA	NA	NA	NA	no	0	NA	NA	NA	NA	NA	no
Mcm3	1	20802968	ENSMUSG00000041859	minichromosome maintenance complex component 3 [Source:MGI Symbol;Acc:MGI:101845]	404	109	429	658	270	343	202	717	82	309.958	0.4009	0.924547	0.433618	0.664566	1	no	309.958	0.770524	0.9242	0.83372	0.404439	1	no	309.958	-0.369624	0.924267	-0.39991	0.689223	1	no
Gm20587	1	20821331	ENSMUSG00000099714	predicted gene, 20587 [Source:MGI Symbol;Acc:MGI:5295693]	0	0	0	0	0	0	0	0	0	0	NA	NA	NA	NA	NA	no	0	NA	NA	NA	NA	NA	no	0	NA	NA	NA	NA	NA	no
Gm28065	1	20836661	ENSMUSG00000102121	predicted gene 28065 [Source:MGI Symbol;Acc:MGI:5578771]	0	0	0	0	0	0	0	0	0	0	NA	NA	NA	NA	NA	no	0	NA	NA	NA	NA	NA	no	0	NA	NA	NA	NA	NA	no
Gm24723	1	20842535	ENSMUSG00000088858	predicted gene, 24723 [Source:MGI Symbol;Acc:MGI:5454500]	0	0	0	0	0	0	0	0	0	0	NA	NA	NA	NA	NA	no	0	NA	NA	NA	NA	NA	no	0	NA	NA	NA	NA	NA	no
6720483E21Rik	1	20888650	ENSMUSG00000097934	RIKEN cDNA 6720483E21 gene [Source:MGI Symbol;Acc:MGI:1924991]	0	0	0	0	0	0	0	0	0	0	NA	NA	NA	NA	NA	no	0	NA	NA	NA	NA	NA	no	0	NA	NA	NA	NA	NA	no
Paqr8	1	20890606	ENSMUSG00000025931	progestin and adipoQ receptor family member VIII [Source:MGI Symbol;Acc:MGI:1921479]	0	70	0	0	0	0	0	0	31	13.3044	1.13298	2.35989	0.480099	NA	NA	no	13.3044	-2.87423	2.37116	-1.21216	NA	NA	no	13.3044	4.00722	2.37068	1.69032	NA	NA	no
Gm24171	1	20915410	ENSMUSG00000077314	predicted gene, 24171 [Source:MGI Symbol;Acc:MGI:5453948]	0	0	0	0	0	0	0	0	0	0	NA	NA	NA	NA	NA	no	0	NA	NA	NA	NA	NA	no	0	NA	NA	NA	NA	NA	no
Gm28064	1	20945711	ENSMUSG00000100929	predicted gene 28064 [Source:MGI Symbol;Acc:MGI:5578770]	0	0	0	0	0	0	0	0	0	0	NA	NA	NA	NA	NA	no	0	NA	NA	NA	NA	NA	no	0	NA	NA	NA	NA	NA	no
Efhc1	1	20951626	ENSMUSG00000041809	EF-hand domain (C-terminal) containing 1 [Source:MGI Symbol;Acc:MGI:1919127]	0	0	0	0	0	0	0	0	0	0	NA	NA	NA	NA	NA	no	0	NA	NA	NA	NA	NA	no	0	NA	NA	NA	NA	NA	no
Tram2	1	20996299	ENSMUSG00000041779	translocating chain-associating membrane protein 2 [Source:MGI Symbol;Acc:MGI:1924817]	53	0	0	79	313	95	0	122	0	65.1252	-0.630808	2.11553	-0.29818	NA	NA	no	65.1252	1.90091	2.11345	0.899437	NA	NA	no	65.1252	-2.53172	2.11478	-1.19716	NA	NA	no
Gm28287	1	21080114	ENSMUSG00000099971	predicted gene 28287 [Source:MGI Symbol;Acc:MGI:5578993]	0	0	0	0	0	0	0	0	0	0	NA	NA	NA	NA	NA	no	0	NA	NA	NA	NA	NA	no	0	NA	NA	NA	NA	NA	no
Gm2693	1	21178988	ENSMUSG00000100819	predicted gene 2693 [Source:MGI Symbol;Acc:MGI:3780862]	0	0	0	0	0	0	0	0	0	0	NA	NA	NA	NA	NA	no	0	NA	NA	NA	NA	NA	no	0	NA	NA	NA	NA	NA	no
Tmem14a	1	21218575	ENSMUSG00000025933	transmembrane protein 14A [Source:MGI Symbol;Acc:MGI:1922962]	0	0	25	0	0	0	314	0	0	23.2515	-2.04145	2.35993	-0.865046	NA	NA	no	23.2515	-4.52299	2.36754	-1.91042	NA	NA	no	23.2515	2.48154	2.36913	1.04745	NA	NA	no
Gm38224	1	21234722	ENSMUSG00000102633	predicted gene, 38224 [Source:MGI Symbol;Acc:MGI:5611452]	0	0	0	0	0	4	0	0	0	0.370147	0	2.40591	0	1	NA	no	0.370147	1.93166	2.39884	0.805246	0.420678	NA	no	0.370147	-1.6355	2.39884	-0.681786	0.495374	NA	no
Gsta3	1	21240589	ENSMUSG00000025934	glutathione S-transferase, alpha 3 [Source:MGI Symbol;Acc:MGI:95856]	0	0	0	0	0	0	0	0	0	0	NA	NA	NA	NA	NA	no	0	NA	NA	NA	NA	NA	no	0	NA	NA	NA	NA	NA	no
Gm28836	1	21250359	ENSMUSG00000099343	predicted gene 28836 [Source:MGI Symbol;Acc:MGI:5579542]	0	0	0	0	0	24	0	0	0	2.22088	0	2.40591	0	NA	NA	no	2.22088	3.72187	2.38754	1.55887	NA	NA	no	2.22088	-3.42571	2.38754	-1.43483	NA	NA	no
Gm7094	1	21272403	ENSMUSG00000096375	predicted pseudogene 7094 [Source:MGI Symbol;Acc:MGI:3648114]	0	0	0	0	0	0	0	0	0	0	NA	NA	NA	NA	NA	no	0	NA	NA	NA	NA	NA	no	0	NA	NA	NA	NA	NA	no
Gm4956	1	21285246	ENSMUSG00000025936	predicted gene 4956 [Source:MGI Symbol;Acc:MGI:3647976]	2	80	80	100	746	226	3	9	3	133.503	3.75622	1.28328	2.92705	0.00342195	0.103068	no	133.503	6.04342	1.28045	4.71976	2.36118e-06	0.000966247	yes	133.503	-2.2872	1.25043	-1.82912	0.0673815	0.60016	no
Gm21909	1	21312517	ENSMUSG00000093963	predicted gene, 21909 [Source:MGI Symbol;Acc:MGI:5434073]	0	0	0	0	0	0	0	0	0	0	NA	NA	NA	NA	NA	no	0	NA	NA	NA	NA	NA	no	0	NA	NA	NA	NA	NA	no
Khdc1a	1	21349641	ENSMUSG00000067750	KH domain containing 1A [Source:MGI Symbol;Acc:MGI:2676610]	12	0	0	0	0	0	0	0	0	1.1264	3.0457	2.391	1.27382	NA	NA	no	1.1264	0	2.40591	0	NA	NA	no	1.1264	2.84182	2.391	1.18855	NA	NA	no
Gm16329	1	21354005	ENSMUSG00000086194	predicted gene 16329 [Source:MGI Symbol;Acc:MGI:3840126]	0	0	0	0	0	0	0	0	0	0	NA	NA	NA	NA	NA	no	0	NA	NA	NA	NA	NA	no	0	NA	NA	NA	NA	NA	no
Gm16327	1	21364803	ENSMUSG00000094436	predicted gene 16327 [Source:MGI Symbol;Acc:MGI:3840125]	0	0	0	0	0	0	0	0	0	0	NA	NA	NA	NA	NA	no	0	NA	NA	NA	NA	NA	no	0	NA	NA	NA	NA	NA	no
Khdc1c	1	21368331	ENSMUSG00000041722	KH domain containing 1C [Source:MGI Symbol;Acc:MGI:3583007]	0	0	0	0	0	0	0	0	0	0	NA	NA	NA	NA	NA	no	0	NA	NA	NA	NA	NA	no	0	NA	NA	NA	NA	NA	no
Gm2709	1	21372670	ENSMUSG00000085507	predicted gene 2709 [Source:MGI Symbol;Acc:MGI:3780878]	0	0	0	0	0	0	0	0	0	0	NA	NA	NA	NA	NA	no	0	NA	NA	NA	NA	NA	no	0	NA	NA	NA	NA	NA	no
Gm16533	1	21379555	ENSMUSG00000094926	predited gene 16533 [Source:MGI Symbol;Acc:MGI:4410373]	0	0	0	0	0	0	0	0	0	0	NA	NA	NA	NA	NA	no	0	NA	NA	NA	NA	NA	no	0	NA	NA	NA	NA	NA	no
Khdc1b	1	21383556	ENSMUSG00000085079	KH domain containing 1B [Source:MGI Symbol;Acc:MGI:2138477]	0	0	0	0	0	0	0	0	0	0	NA	NA	NA	NA	NA	no	0	NA	NA	NA	NA	NA	no	0	NA	NA	NA	NA	NA	no
Gm16328	1	21390906	ENSMUSG00000085679	predicted gene 16328 [Source:MGI Symbol;Acc:MGI:3840127]	0	0	0	0	0	0	0	0	0	0	NA	NA	NA	NA	NA	no	0	NA	NA	NA	NA	NA	no	0	NA	NA	NA	NA	NA	no
Kcnq5	1	21398403	ENSMUSG00000028033	potassium voltage-gated channel, subfamily Q, member 5 [Source:MGI Symbol;Acc:MGI:1924937]	0	0	0	0	0	0	0	0	2	0.214537	-0.99481	2.40243	-0.414085	0.678812	NA	no	0.214537	-1.08709	2.40243	-0.452498	0.65091	NA	no	0.214537	0	2.40591	0	1	NA	no
Gm36949	1	21454691	ENSMUSG00000104138	predicted gene, 36949 [Source:MGI Symbol;Acc:MGI:5610177]	0	0	0	0	0	0	0	0	0	0	NA	NA	NA	NA	NA	no	0	NA	NA	NA	NA	NA	no	0	NA	NA	NA	NA	NA	no
Gm7658	1	21511933	ENSMUSG00000082935	predicted gene 7658 [Source:MGI Symbol;Acc:MGI:3648029]	1	2	0	1	15	8	0	0	0	2.83572	2.08514	2.25076	0.926417	0.354229	NA	no	2.83572	4.18896	2.22704	1.88096	0.0599774	NA	no	2.83572	-2.10382	2.19208	-0.959737	0.337188	NA	no
Gm38243	1	21838948	ENSMUSG00000103748	predicted gene, 38243 [Source:MGI Symbol;Acc:MGI:5611471]	0	0	0	0	0	0	0	0	0	0	NA	NA	NA	NA	NA	no	0	NA	NA	NA	NA	NA	no	0	NA	NA	NA	NA	NA	no
Gm26580	1	21959842	ENSMUSG00000097109	predicted gene, 26580 [Source:MGI Symbol;Acc:MGI:5477074]	0	0	0	0	0	0	0	0	0	0	NA	NA	NA	NA	NA	no	0	NA	NA	NA	NA	NA	no	0	NA	NA	NA	NA	NA	no
Gm5696	1	22030064	ENSMUSG00000099692	predicted gene 5696 [Source:MGI Symbol;Acc:MGI:3647717]	0	0	0	0	0	0	0	0	0	0	NA	NA	NA	NA	NA	no	0	NA	NA	NA	NA	NA	no	0	NA	NA	NA	NA	NA	no
Gm28239	1	22237849	ENSMUSG00000100418	predicted gene 28239 [Source:MGI Symbol;Acc:MGI:5578945]	0	0	0	0	0	0	0	0	0	0	NA	NA	NA	NA	NA	no	0	NA	NA	NA	NA	NA	no	0	NA	NA	NA	NA	NA	no
Rims1	1	22286251	ENSMUSG00000041670	regulating synaptic membrane exocytosis 1 [Source:MGI Symbol;Acc:MGI:2152971]	0	0	0	0	0	0	0	0	0	0	NA	NA	NA	NA	NA	no	0	NA	NA	NA	NA	NA	no	0	NA	NA	NA	NA	NA	no
Gm26866	1	22740764	ENSMUSG00000097642	predicted gene, 26866 [Source:MGI Symbol;Acc:MGI:5477360]	0	0	0	0	0	0	0	0	0	0	NA	NA	NA	NA	NA	no	0	NA	NA	NA	NA	NA	no	0	NA	NA	NA	NA	NA	no
Gm7761	1	22984863	ENSMUSG00000101468	predicted gene 7761 [Source:MGI Symbol;Acc:MGI:3643583]	0	0	0	0	0	0	0	0	0	0	NA	NA	NA	NA	NA	no	0	NA	NA	NA	NA	NA	no	0	NA	NA	NA	NA	NA	no
Gm29506	1	23048295	ENSMUSG00000101227	predicted gene 29506 [Source:MGI Symbol;Acc:MGI:5580212]	0	0	0	0	0	0	0	0	0	0	NA	NA	NA	NA	NA	no	0	NA	NA	NA	NA	NA	no	0	NA	NA	NA	NA	NA	no
4933415F23Rik	1	23100473	ENSMUSG00000073730	RIKEN cDNA 4933415F23 gene [Source:MGI Symbol;Acc:MGI:1914005]	0	0	0	0	0	0	0	0	0	0	NA	NA	NA	NA	NA	no	0	NA	NA	NA	NA	NA	no	0	NA	NA	NA	NA	NA	no
Gm24176	1	23245211	ENSMUSG00000089553	predicted gene, 24176 [Source:MGI Symbol;Acc:MGI:5453953]	0	0	0	0	0	0	0	0	0	0	NA	NA	NA	NA	NA	no	0	NA	NA	NA	NA	NA	no	0	NA	NA	NA	NA	NA	no
Gm6420	1	23255685	ENSMUSG00000102766	predicted gene 6420 [Source:MGI Symbol;Acc:MGI:3644588]	0	0	0	0	0	0	0	0	0	0	NA	NA	NA	NA	NA	no	0	NA	NA	NA	NA	NA	no	0	NA	NA	NA	NA	NA	no
Mir30a	1	23272269	ENSMUSG00000065405	microRNA 30a [Source:MGI Symbol;Acc:MGI:2676907]	0	0	0	0	0	0	0	0	0	0	NA	NA	NA	NA	NA	no	0	NA	NA	NA	NA	NA	no	0	NA	NA	NA	NA	NA	no
Gm27028	1	23291537	ENSMUSG00000097970	predicted gene, 27028 [Source:MGI Symbol;Acc:MGI:5504143]	0	0	0	0	0	0	0	0	0	0	NA	NA	NA	NA	NA	no	0	NA	NA	NA	NA	NA	no	0	NA	NA	NA	NA	NA	no
Mir30c-2	1	23291701	ENSMUSG00000065567	microRNA 30c-2 [Source:MGI Symbol;Acc:MGI:3619048]	0	0	0	0	0	0	0	0	0	0	NA	NA	NA	NA	NA	no	0	NA	NA	NA	NA	NA	no	0	NA	NA	NA	NA	NA	no
Gm29107	1	23293729	ENSMUSG00000100775	predicted gene 29107 [Source:MGI Symbol;Acc:MGI:5579813]	0	0	0	0	0	0	0	0	0	0	NA	NA	NA	NA	NA	no	0	NA	NA	NA	NA	NA	no	0	NA	NA	NA	NA	NA	no
Gm20954	1	23345956	ENSMUSG00000101226	predicted gene, 20954 [Source:MGI Symbol;Acc:MGI:5434309]	0	0	0	0	0	0	0	0	0	0	NA	NA	NA	NA	NA	no	0	NA	NA	NA	NA	NA	no	0	NA	NA	NA	NA	NA	no
Ogfrl1	1	23366424	ENSMUSG00000026158	opioid growth factor receptor-like 1 [Source:MGI Symbol;Acc:MGI:1917405]	0	0	1	0	0	0	19	0	41	5.74755	-3.67497	2.38112	-1.54338	0.122739	NA	no	5.74755	-4.38712	2.38521	-1.8393	0.0658707	NA	no	5.74755	0.712148	2.40253	0.296416	0.766912	NA	no
Gm7784	1	23479539	ENSMUSG00000097920	predicted gene 7784 [Source:MGI Symbol;Acc:MGI:3645448]	0	0	0	0	0	0	0	0	0	0	NA	NA	NA	NA	NA	no	0	NA	NA	NA	NA	NA	no	0	NA	NA	NA	NA	NA	no
Gm28822	1	23574587	ENSMUSG00000099503	predicted gene 28822 [Source:MGI Symbol;Acc:MGI:5579528]	0	0	0	0	0	0	0	0	0	0	NA	NA	NA	NA	NA	no	0	NA	NA	NA	NA	NA	no	0	NA	NA	NA	NA	NA	no
B3gat2	1	23761753	ENSMUSG00000026156	beta-1,3-glucuronyltransferase 2 (glucuronosyltransferase S) [Source:MGI Symbol;Acc:MGI:2389490]	0	0	0	0	0	0	0	0	0	0	NA	NA	NA	NA	NA	no	0	NA	NA	NA	NA	NA	no	0	NA	NA	NA	NA	NA	no
Smap1	1	23844846	ENSMUSG00000026155	small ArfGAP 1 [Source:MGI Symbol;Acc:MGI:2138261]	218	32	242	48	223	114	0	365	387	160.835	-0.363545	1.49346	-0.243425	0.807676	1	no	160.835	-0.71553	1.49359	-0.479068	0.63189	1	no	160.835	0.351985	1.49403	0.235595	0.813747	1	no
Sdhaf4	1	23995939	ENSMUSG00000026154	succinate dehydrogenase complex assembly factor 4 [Source:MGI Symbol;Acc:MGI:1915252]	348	2	97	174	278	175	85	1	150	130.474	0.913566	1.45549	0.627671	0.53022	0.99208	no	130.474	1.42689	1.45501	0.980672	0.326754	1	no	130.474	-0.513324	1.45459	-0.3529	0.724163	1	no
Gm26524	1	24005505	ENSMUSG00000102495	predicted gene, 26524 [Source:MGI Symbol;Acc:MGI:5477018]	0	0	0	0	0	0	0	0	0	0	NA	NA	NA	NA	NA	no	0	NA	NA	NA	NA	NA	no	0	NA	NA	NA	NA	NA	no
Fam135a	1	24011093	ENSMUSG00000026153	family with sequence similarity 135, member A [Source:MGI Symbol;Acc:MGI:1915437]	0	3	1	0	0	0	2	0	0	0.669876	1.26485	2.39153	0.528887	0.596884	NA	no	0.669876	-0.753538	2.40219	-0.313688	0.753758	NA	no	0.669876	2.01839	2.39565	0.842521	0.399496	NA	no
Gm37580	1	24100625	ENSMUSG00000102398	predicted gene, 37580 [Source:MGI Symbol;Acc:MGI:5610808]	0	0	0	0	0	0	0	0	0	0	NA	NA	NA	NA	NA	no	0	NA	NA	NA	NA	NA	no	0	NA	NA	NA	NA	NA	no
Gm26607	1	24125275	ENSMUSG00000097670	predicted gene, 26607 [Source:MGI Symbol;Acc:MGI:5477101]	0	0	0	0	0	0	0	0	0	0	NA	NA	NA	NA	NA	no	0	NA	NA	NA	NA	NA	no	0	NA	NA	NA	NA	NA	no
Col9a1	1	24177610	ENSMUSG00000026147	collagen, type IX, alpha 1 [Source:MGI Symbol;Acc:MGI:88465]	0	0	0	0	0	0	0	0	0	0	NA	NA	NA	NA	NA	no	0	NA	NA	NA	NA	NA	no	0	NA	NA	NA	NA	NA	no
Col19a1	1	24261890	ENSMUSG00000026141	collagen, type XIX, alpha 1 [Source:MGI Symbol;Acc:MGI:1095415]	0	0	0	0	0	0	0	0	0	0	NA	NA	NA	NA	NA	no	0	NA	NA	NA	NA	NA	no	0	NA	NA	NA	NA	NA	no
Gm26418	1	24548841	ENSMUSG00000077463	predicted gene, 26418 [Source:MGI Symbol;Acc:MGI:5456195]	0	0	0	0	0	0	0	0	0	0	NA	NA	NA	NA	NA	no	0	NA	NA	NA	NA	NA	no	0	NA	NA	NA	NA	NA	no
Tubb4b-ps2	1	24594087	ENSMUSG00000099997	tubulin, beta 4B class IVB, pseudogene 2 [Source:MGI Symbol;Acc:MGI:3723458]	0	1	0	0	0	0	0	0	0	0.142558	0.863238	2.40591	0.358799	0.719746	NA	no	0.142558	0	2.40591	0	1	NA	no	0.142558	0.659364	2.40591	0.27406	0.784039	NA	no
Gm28439	1	24611535	ENSMUSG00000100131	predicted gene 28439 [Source:MGI Symbol;Acc:MGI:5579145]	0	0	0	0	0	0	0	0	0	0	NA	NA	NA	NA	NA	no	0	NA	NA	NA	NA	NA	no	0	NA	NA	NA	NA	NA	no
Gm10222	1	24612407	ENSMUSG00000067736	predicted gene 10222 [Source:MGI Symbol;Acc:MGI:3642643]	0	0	0	0	0	0	0	0	0	0	NA	NA	NA	NA	NA	no	0	NA	NA	NA	NA	NA	no	0	NA	NA	NA	NA	NA	no
Gm28438	1	24612775	ENSMUSG00000101939	predicted gene 28438 [Source:MGI Symbol;Acc:MGI:5579144]	91	466	111	0	2	1	1	0	1	87.8769	8.25366	1.41322	5.84032	5.20995e-09	1.26706e-05	yes	87.8769	0.729671	1.53888	0.474157	0.635388	1	no	87.8769	7.52399	1.37227	5.48287	4.1847e-08	4.2978e-05	yes
Gm28437	1	24613189	ENSMUSG00000101111	predicted gene 28437 [Source:MGI Symbol;Acc:MGI:5579143]	2	1	30	0	2	1	3	1	2	4.48033	2.53341	1.72988	1.4645	0.143057	NA	no	4.48033	-0.51716	1.80012	-0.287292	0.773889	NA	no	4.48033	3.05057	1.7662	1.7272	0.0841325	NA	no
Gm10925	1	24613974	ENSMUSG00000100862	predicted gene 10925 [Source:MGI Symbol;Acc:MGI:3809095]	0	0	0	0	1	2	1	0	1	0.464637	-0.845812	2.40143	-0.352212	0.72468	NA	no	0.464637	0.50492	2.39486	0.210835	0.833016	NA	no	0.464637	-1.35073	2.39964	-0.562889	0.57351	NA	no
Gm28661	1	24614885	ENSMUSG00000102070	predicted gene 28661 [Source:MGI Symbol;Acc:MGI:5579367]	0	0	1	2	0	28	1	2	61	9.68047	-4.19681	2.08141	-2.01634	NA	NA	no	9.68047	-1.03034	2.02078	-0.509873	NA	NA	no	9.68047	-3.16647	2.0854	-1.5184	NA	NA	no
Gm29216	1	24615706	ENSMUSG00000101249	predicted gene 29216 [Source:MGI Symbol;Acc:MGI:5579922]	1	94	20	2	1	2	1	1	119	29.1487	0.250077	1.71342	0.145952	0.883959	1	no	29.1487	-3.85391	1.75108	-2.20087	0.0277449	0.363	no	29.1487	4.10398	1.75148	2.34315	0.0191217	0.298668	no
Lmbrd1	1	24678630	ENSMUSG00000073725	LMBR1 domain containing 1 [Source:MGI Symbol;Acc:MGI:1915671]	144	93	25	1	0	120	142	337	69	82.8552	-0.452722	1.55829	-0.290526	0.771414	1	no	82.8552	-1.68413	1.56004	-1.07955	0.280344	1	no	82.8552	1.23141	1.56081	0.788954	0.430139	1	no
Gm28594	1	24910461	ENSMUSG00000100808	predicted gene 28594 [Source:MGI Symbol;Acc:MGI:5579300]	0	0	0	0	0	0	0	0	0	0	NA	NA	NA	NA	NA	no	0	NA	NA	NA	NA	NA	no	0	NA	NA	NA	NA	NA	no
Gm28237	1	24963209	ENSMUSG00000100483	predicted gene 28237 [Source:MGI Symbol;Acc:MGI:5578943]	0	0	0	0	0	0	0	0	0	0	NA	NA	NA	NA	NA	no	0	NA	NA	NA	NA	NA	no	0	NA	NA	NA	NA	NA	no
Gm9443	1	25011941	ENSMUSG00000100450	predicted gene 9443 [Source:MGI Symbol;Acc:MGI:3779853]	0	0	0	0	0	0	0	0	0	0	NA	NA	NA	NA	NA	no	0	NA	NA	NA	NA	NA	no	0	NA	NA	NA	NA	NA	no
Gm29414	1	25026581	ENSMUSG00000099392	predicted gene 29414 [Source:MGI Symbol;Acc:MGI:5580120]	0	0	0	0	0	0	0	0	0	0	NA	NA	NA	NA	NA	no	0	NA	NA	NA	NA	NA	no	0	NA	NA	NA	NA	NA	no
Adgrb3	1	25067476	ENSMUSG00000033569	adhesion G protein-coupled receptor B3 [Source:MGI Symbol;Acc:MGI:2441837]	0	0	0	0	0	1	0	0	0	0.0925369	0	2.40591	0	1	NA	no	0.0925369	0.770953	2.40591	0.320441	0.748634	NA	no	0.0925369	-0.474794	2.40591	-0.197345	0.843558	NA	no
Gm15702	1	25223730	ENSMUSG00000080849	predicted gene 15702 [Source:MGI Symbol;Acc:MGI:3783142]	0	0	0	0	0	0	0	0	0	0	NA	NA	NA	NA	NA	no	0	NA	NA	NA	NA	NA	no	0	NA	NA	NA	NA	NA	no
Gm20172	1	25276404	ENSMUSG00000104257	predicted gene, 20172 [Source:MGI Symbol;Acc:MGI:5012357]	0	0	0	0	0	0	0	0	0	0	NA	NA	NA	NA	NA	no	0	NA	NA	NA	NA	NA	no	0	NA	NA	NA	NA	NA	no
Gm22260	1	25279445	ENSMUSG00000096866	predicted gene, 22260 [Source:MGI Symbol;Acc:MGI:5452037]	0	0	0	0	0	0	0	0	0	0	NA	NA	NA	NA	NA	no	0	NA	NA	NA	NA	NA	no	0	NA	NA	NA	NA	NA	no
Gm37543	1	25284218	ENSMUSG00000102296	predicted gene, 37543 [Source:MGI Symbol;Acc:MGI:5610771]	0	0	0	0	0	0	0	0	0	0	NA	NA	NA	NA	NA	no	0	NA	NA	NA	NA	NA	no	0	NA	NA	NA	NA	NA	no
Gm37331	1	25296512	ENSMUSG00000103209	predicted gene, 37331 [Source:MGI Symbol;Acc:MGI:5610559]	0	0	0	0	0	0	0	0	0	0	NA	NA	NA	NA	NA	no	0	NA	NA	NA	NA	NA	no	0	NA	NA	NA	NA	NA	no
Gm37211	1	25314276	ENSMUSG00000104027	predicted gene, 37211 [Source:MGI Symbol;Acc:MGI:5610439]	0	0	0	0	0	0	0	0	0	0	NA	NA	NA	NA	NA	no	0	NA	NA	NA	NA	NA	no	0	NA	NA	NA	NA	NA	no
Gm37862	1	25325866	ENSMUSG00000102407	predicted gene, 37862 [Source:MGI Symbol;Acc:MGI:5611090]	0	0	0	0	0	0	0	0	0	0	NA	NA	NA	NA	NA	no	0	NA	NA	NA	NA	NA	no	0	NA	NA	NA	NA	NA	no
Gm38286	1	25345978	ENSMUSG00000103214	predicted gene, 38286 [Source:MGI Symbol;Acc:MGI:5611514]	0	0	0	0	0	0	0	0	0	0	NA	NA	NA	NA	NA	no	0	NA	NA	NA	NA	NA	no	0	NA	NA	NA	NA	NA	no
Gm37880	1	25362564	ENSMUSG00000104100	predicted gene, 37880 [Source:MGI Symbol;Acc:MGI:5611108]	0	0	0	0	0	0	0	0	0	0	NA	NA	NA	NA	NA	no	0	NA	NA	NA	NA	NA	no	0	NA	NA	NA	NA	NA	no
Gm25294	1	25451071	ENSMUSG00000084740	predicted gene, 25294 [Source:MGI Symbol;Acc:MGI:5455071]	0	0	0	0	0	0	0	0	0	0	NA	NA	NA	NA	NA	no	0	NA	NA	NA	NA	NA	no	0	NA	NA	NA	NA	NA	no
Gm37011	1	25608250	ENSMUSG00000103889	predicted gene, 37011 [Source:MGI Symbol;Acc:MGI:5610239]	0	0	0	0	0	0	0	0	0	0	NA	NA	NA	NA	NA	no	0	NA	NA	NA	NA	NA	no	0	NA	NA	NA	NA	NA	no
Gm29214	1	25614946	ENSMUSG00000101301	predicted gene 29214 [Source:MGI Symbol;Acc:MGI:5579920]	0	0	0	0	0	0	0	0	0	0	NA	NA	NA	NA	NA	no	0	NA	NA	NA	NA	NA	no	0	NA	NA	NA	NA	NA	no
Gm37051	1	25620238	ENSMUSG00000104221	predicted gene, 37051 [Source:MGI Symbol;Acc:MGI:5610279]	0	0	0	0	0	0	0	0	0	0	NA	NA	NA	NA	NA	no	0	NA	NA	NA	NA	NA	no	0	NA	NA	NA	NA	NA	no
Gm38260	1	25672245	ENSMUSG00000102250	predicted gene, 38260 [Source:MGI Symbol;Acc:MGI:5611488]	0	0	0	0	0	0	0	0	0	0	NA	NA	NA	NA	NA	no	0	NA	NA	NA	NA	NA	no	0	NA	NA	NA	NA	NA	no
Gm37628	1	25686062	ENSMUSG00000102317	predicted gene, 37628 [Source:MGI Symbol;Acc:MGI:5610856]	0	0	0	0	0	0	0	0	0	0	NA	NA	NA	NA	NA	no	0	NA	NA	NA	NA	NA	no	0	NA	NA	NA	NA	NA	no
8030445P17Rik	1	25722038	ENSMUSG00000103563	RIKEN cDNA 8030445P17 gene [Source:MGI Symbol;Acc:MGI:2442299]	0	0	0	0	0	0	1	0	1	0.172406	-0.813512	2.404	-0.338399	0.735063	NA	no	0.172406	-0.905797	2.404	-0.376787	0.706332	NA	no	0.172406	0	2.40591	0	1	NA	no
Gm38198	1	25735389	ENSMUSG00000102465	predicted gene, 38198 [Source:MGI Symbol;Acc:MGI:5611426]	0	0	0	0	0	0	0	0	0	0	NA	NA	NA	NA	NA	no	0	NA	NA	NA	NA	NA	no	0	NA	NA	NA	NA	NA	no
Gm37077	1	25755343	ENSMUSG00000102659	predicted gene, 37077 [Source:MGI Symbol;Acc:MGI:5610305]	0	1	0	0	0	0	0	0	0	0.142558	0.863238	2.40591	0.358799	0.719746	NA	no	0.142558	0	2.40591	0	1	NA	no	0.142558	0.659364	2.40591	0.27406	0.784039	NA	no
Gm37895	1	25775757	ENSMUSG00000103924	predicted gene, 37895 [Source:MGI Symbol;Acc:MGI:5611123]	0	0	0	0	0	0	0	0	0	0	NA	NA	NA	NA	NA	no	0	NA	NA	NA	NA	NA	no	0	NA	NA	NA	NA	NA	no
Gm36952	1	25797281	ENSMUSG00000104132	predicted gene, 36952 [Source:MGI Symbol;Acc:MGI:5610180]	0	0	0	0	0	0	0	0	0	0	NA	NA	NA	NA	NA	no	0	NA	NA	NA	NA	NA	no	0	NA	NA	NA	NA	NA	no
Gm37602	1	25804097	ENSMUSG00000102747	predicted gene, 37602 [Source:MGI Symbol;Acc:MGI:5610830]	0	0	0	0	0	0	0	0	0	0	NA	NA	NA	NA	NA	no	0	NA	NA	NA	NA	NA	no	0	NA	NA	NA	NA	NA	no
2900022M07Rik	1	25808956	ENSMUSG00000102386	RIKEN cDNA 2900022M07 gene [Source:MGI Symbol;Acc:MGI:1920201]	0	0	0	0	0	0	0	0	1	0.107268	-0.270919	2.40591	-0.112606	0.910343	NA	no	0.107268	-0.363204	2.40591	-0.150963	0.880005	NA	no	0.107268	0	2.40591	0	1	NA	no
2900002M20Rik	1	25824390	ENSMUSG00000103004	RIKEN cDNA 2900002M20 gene [Source:MGI Symbol;Acc:MGI:1925574]	0	0	0	0	0	0	0	0	0	0	NA	NA	NA	NA	NA	no	0	NA	NA	NA	NA	NA	no	0	NA	NA	NA	NA	NA	no
Gm9884	1	25830657	ENSMUSG00000104516	predicted gene 9884 [Source:MGI Symbol;Acc:MGI:3642830]	0	0	0	0	0	0	0	0	0	0	NA	NA	NA	NA	NA	no	0	NA	NA	NA	NA	NA	no	0	NA	NA	NA	NA	NA	no
Gm18443	1	25996604	ENSMUSG00000101618	predicted gene, 18443 [Source:MGI Symbol;Acc:MGI:5010628]	0	0	0	0	0	0	0	0	0	0	NA	NA	NA	NA	NA	no	0	NA	NA	NA	NA	NA	no	0	NA	NA	NA	NA	NA	no
Gm19123	1	26466236	ENSMUSG00000099458	predicted gene, 19123 [Source:MGI Symbol;Acc:MGI:5011308]	0	0	0	0	0	0	0	0	0	0	NA	NA	NA	NA	NA	no	0	NA	NA	NA	NA	NA	no	0	NA	NA	NA	NA	NA	no
Gm24064	1	26566833	ENSMUSG00000088111	predicted gene, 24064 [Source:MGI Symbol;Acc:MGI:5453841]	0	0	0	0	0	0	0	0	0	0	NA	NA	NA	NA	NA	no	0	NA	NA	NA	NA	NA	no	0	NA	NA	NA	NA	NA	no
4931408C20Rik	1	26681814	ENSMUSG00000073722	RIKEN cDNA 4931408C20 gene [Source:MGI Symbol;Acc:MGI:3588222]	0	0	0	0	0	0	0	0	0	0	NA	NA	NA	NA	NA	no	0	NA	NA	NA	NA	NA	no	0	NA	NA	NA	NA	NA	no
n-R5s209	1	26959103	ENSMUSG00000095256	nuclear encoded rRNA 5S 209 [Source:MGI Symbol;Acc:MGI:4422074]	0	0	0	0	0	0	0	0	0	0	NA	NA	NA	NA	NA	no	0	NA	NA	NA	NA	NA	no	0	NA	NA	NA	NA	NA	no
Gm19641	1	27336352	ENSMUSG00000100310	predicted gene, 19641 [Source:MGI Symbol;Acc:MGI:5011826]	0	0	0	0	0	0	1	0	0	0.065138	-0.270919	2.40591	-0.112606	0.910343	NA	no	0.065138	-0.363204	2.40591	-0.150963	0.880005	NA	no	0.065138	0	2.40591	0	1	NA	no
Gm5524	1	27884046	ENSMUSG00000101514	predicted gene 5524 [Source:MGI Symbol;Acc:MGI:3646041]	0	0	0	0	0	0	0	0	0	0	NA	NA	NA	NA	NA	no	0	NA	NA	NA	NA	NA	no	0	NA	NA	NA	NA	NA	no
Gm18776	1	27900419	ENSMUSG00000101033	predicted gene, 18776 [Source:MGI Symbol;Acc:MGI:5010961]	0	0	0	0	0	0	0	0	0	0	NA	NA	NA	NA	NA	no	0	NA	NA	NA	NA	NA	no	0	NA	NA	NA	NA	NA	no
Gm19028	1	27989910	ENSMUSG00000101372	predicted gene, 19028 [Source:MGI Symbol;Acc:MGI:5011213]	0	0	0	0	0	0	0	0	0	0	NA	NA	NA	NA	NA	no	0	NA	NA	NA	NA	NA	no	0	NA	NA	NA	NA	NA	no
Gm38089	1	28569918	ENSMUSG00000103241	predicted gene, 38089 [Source:MGI Symbol;Acc:MGI:5611317]	0	0	0	0	0	0	0	0	0	0	NA	NA	NA	NA	NA	no	0	NA	NA	NA	NA	NA	no	0	NA	NA	NA	NA	NA	no
Gm7846	1	28580499	ENSMUSG00000086240	predicted gene 7846 [Source:MGI Symbol;Acc:MGI:3645212]	0	0	3	0	0	0	0	0	0	0.335781	1.82882	2.40198	0.761382	0.446429	NA	no	0.335781	0	2.40591	0	1	NA	no	0.335781	1.62495	2.40198	0.676505	0.49872	NA	no
Gm597	1	28776117	ENSMUSG00000048411	predicted gene 597 [Source:MGI Symbol;Acc:MGI:2685443]	0	0	0	0	0	0	0	0	0	0	NA	NA	NA	NA	NA	no	0	NA	NA	NA	NA	NA	no	0	NA	NA	NA	NA	NA	no
Gm5697	1	28800240	ENSMUSG00000081557	predicted gene 5697 [Source:MGI Symbol;Acc:MGI:3649021]	0	0	0	1	1	0	0	0	1	0.323507	-0.270919	2.40591	-0.112606	0.910343	NA	no	0.323507	0.804031	2.40471	0.334356	0.738111	NA	no	0.323507	-1.07495	2.40471	-0.447018	0.654862	NA	no
Gm6462	1	28938036	ENSMUSG00000058590	predicted gene 6462 [Source:MGI Symbol;Acc:MGI:3647053]	0	0	0	0	0	0	0	0	0	0	NA	NA	NA	NA	NA	no	0	NA	NA	NA	NA	NA	no	0	NA	NA	NA	NA	NA	no
Gm18033	1	29219700	ENSMUSG00000101235	predicted gene, 18033 [Source:MGI Symbol;Acc:MGI:5010218]	1	0	0	0	0	0	0	0	0	0.0938667	0.863238	2.40591	0.358799	0.719746	NA	no	0.0938667	0	2.40591	0	1	NA	no	0.0938667	0.659364	2.40591	0.27406	0.784039	NA	no
Gm25586	1	29280964	ENSMUSG00000064433	predicted gene, 25586 [Source:MGI Symbol;Acc:MGI:5455363]	0	0	0	0	0	0	0	0	0	0	NA	NA	NA	NA	NA	no	0	NA	NA	NA	NA	NA	no	0	NA	NA	NA	NA	NA	no
Gm22679	1	29301480	ENSMUSG00000080625	predicted gene, 22679 [Source:MGI Symbol;Acc:MGI:5452456]	0	0	0	0	0	0	0	0	0	0	NA	NA	NA	NA	NA	no	0	NA	NA	NA	NA	NA	no	0	NA	NA	NA	NA	NA	no
Gm23785	1	29361275	ENSMUSG00000080391	predicted gene, 23785 [Source:MGI Symbol;Acc:MGI:5453562]	0	0	0	0	0	0	0	0	0	0	NA	NA	NA	NA	NA	no	0	NA	NA	NA	NA	NA	no	0	NA	NA	NA	NA	NA	no
Mir6342	1	29421488	ENSMUSG00000099257	microRNA 6342 [Source:MGI Symbol;Acc:MGI:5530650]	0	0	0	0	0	0	0	0	0	0	NA	NA	NA	NA	NA	no	0	NA	NA	NA	NA	NA	no	0	NA	NA	NA	NA	NA	no
Gm5525	1	29484604	ENSMUSG00000099492	predicted gene 5525 [Source:MGI Symbol;Acc:MGI:3646042]	0	0	0	0	0	2	0	1	0	0.260497	-0.270919	2.40591	-0.112606	0.910343	NA	no	0.260497	0.708434	2.40538	0.294521	0.76836	NA	no	0.260497	-0.979353	2.40538	-0.407152	0.683897	NA	no
Gm7858	1	29930094	ENSMUSG00000101726	predicted gene 7858 [Source:MGI Symbol;Acc:MGI:3644844]	0	0	0	0	0	0	0	0	0	0	NA	NA	NA	NA	NA	no	0	NA	NA	NA	NA	NA	no	0	NA	NA	NA	NA	NA	no
Gm23771	1	29985934	ENSMUSG00000096829	predicted gene, 23771 [Source:MGI Symbol;Acc:MGI:5453548]	0	0	0	0	0	0	0	0	0	0	NA	NA	NA	NA	NA	no	0	NA	NA	NA	NA	NA	no	0	NA	NA	NA	NA	NA	no
Gm27430	1	30333291	ENSMUSG00000098883	predicted gene, 27430 [Source:MGI Symbol;Acc:MGI:5530812]	0	0	0	0	0	0	0	0	0	0	NA	NA	NA	NA	NA	no	0	NA	NA	NA	NA	NA	no	0	NA	NA	NA	NA	NA	no
Gm9898	1	30718560	ENSMUSG00000053185	predicted gene 9898 [Source:MGI Symbol;Acc:MGI:3642391]	0	0	0	0	0	0	0	0	0	0	NA	NA	NA	NA	NA	no	0	NA	NA	NA	NA	NA	no	0	NA	NA	NA	NA	NA	no
Gm6473	1	30769687	ENSMUSG00000100261	predicted gene 6473 [Source:MGI Symbol;Acc:MGI:3645176]	0	0	0	0	0	0	0	0	0	0	NA	NA	NA	NA	NA	no	0	NA	NA	NA	NA	NA	no	0	NA	NA	NA	NA	NA	no
Gm2914	1	30794548	ENSMUSG00000101180	predicted gene 2914 [Source:MGI Symbol;Acc:MGI:3781092]	0	0	0	0	0	0	0	0	0	0	NA	NA	NA	NA	NA	no	0	NA	NA	NA	NA	NA	no	0	NA	NA	NA	NA	NA	no
Phf3	1	30802339	ENSMUSG00000048874	PHD finger protein 3 [Source:MGI Symbol;Acc:MGI:2446126]	384	153	218	452	429	394	516	368	269	304.213	-0.130997	0.513446	-0.255134	0.79862	1	no	304.213	0.539675	0.512237	1.05356	0.292082	1	no	304.213	-0.670672	0.513193	-1.30686	0.19126	0.942178	no
Gm37522	1	30833548	ENSMUSG00000103783	predicted gene, 37522 [Source:MGI Symbol;Acc:MGI:5610750]	0	0	0	0	0	0	0	0	0	0	NA	NA	NA	NA	NA	no	0	NA	NA	NA	NA	NA	no	0	NA	NA	NA	NA	NA	no
Gm37906	1	30865504	ENSMUSG00000104315	predicted gene, 37906 [Source:MGI Symbol;Acc:MGI:5611134]	0	0	78	0	0	0	5	0	0	9.056	3.25352	2.36715	1.37445	NA	NA	no	9.056	-1.46806	2.39006	-0.614237	NA	NA	no	9.056	4.72158	2.38409	1.98045	NA	NA	no
Ptp4a1	1	30940302	ENSMUSG00000026064	protein tyrosine phosphatase 4a1 [Source:MGI Symbol;Acc:MGI:1277096]	0	1	0	1	1	0	0	0	1	0.466064	0.2794	2.4055	0.116151	0.907533	NA	no	0.466064	0.771955	2.40293	0.321256	0.748017	NA	no	0.466064	-0.492555	2.40336	-0.204945	0.837615	NA	no
Gm5698	1	30977244	ENSMUSG00000086151	predicted gene 5698 [Source:MGI Symbol;Acc:MGI:3649020]	0	0	0	0	0	0	0	0	0	0	NA	NA	NA	NA	NA	no	0	NA	NA	NA	NA	NA	no	0	NA	NA	NA	NA	NA	no
Gm9458	1	30986226	ENSMUSG00000086726	predicted gene 9458 [Source:MGI Symbol;Acc:MGI:3779868]	0	0	0	0	0	0	0	0	0	0	NA	NA	NA	NA	NA	no	0	NA	NA	NA	NA	NA	no	0	NA	NA	NA	NA	NA	no
Gm5699	1	30998184	ENSMUSG00000087346	predicted gene 5699 [Source:MGI Symbol;Acc:MGI:3648192]	0	0	0	0	0	0	0	0	0	0	NA	NA	NA	NA	NA	no	0	NA	NA	NA	NA	NA	no	0	NA	NA	NA	NA	NA	no
Gm29669	1	31019188	ENSMUSG00000100371	predicted gene 29669 [Source:MGI Symbol;Acc:MGI:5580375]	0	0	0	0	0	0	0	0	0	0	NA	NA	NA	NA	NA	no	0	NA	NA	NA	NA	NA	no	0	NA	NA	NA	NA	NA	no
Gm28644	1	31041919	ENSMUSG00000100237	predicted gene 28644 [Source:MGI Symbol;Acc:MGI:5579350]	0	0	0	0	0	0	0	0	0	0	NA	NA	NA	NA	NA	no	0	NA	NA	NA	NA	NA	no	0	NA	NA	NA	NA	NA	no
Gm27362	1	31122725	ENSMUSG00000098529	predicted gene, 27362 [Source:MGI Symbol;Acc:MGI:5530744]	0	0	0	0	0	0	0	0	0	0	NA	NA	NA	NA	NA	no	0	NA	NA	NA	NA	NA	no	0	NA	NA	NA	NA	NA	no
4931428L18Rik	1	31135226	ENSMUSG00000086727	RIKEN cDNA 4931428L18 gene [Source:MGI Symbol;Acc:MGI:1918238]	0	0	0	0	0	0	0	0	0	0	NA	NA	NA	NA	NA	no	0	NA	NA	NA	NA	NA	no	0	NA	NA	NA	NA	NA	no
Gm29128	1	31136026	ENSMUSG00000100910	predicted gene 29128 [Source:MGI Symbol;Acc:MGI:5579834]	0	0	0	0	0	0	0	0	0	0	NA	NA	NA	NA	NA	no	0	NA	NA	NA	NA	NA	no	0	NA	NA	NA	NA	NA	no
Gm7893	1	31164549	ENSMUSG00000099796	predicted gene 7893 [Source:MGI Symbol;Acc:MGI:3648015]	0	0	0	0	0	0	0	0	0	0	NA	NA	NA	NA	NA	no	0	NA	NA	NA	NA	NA	no	0	NA	NA	NA	NA	NA	no
Lgsn	1	31176401	ENSMUSG00000050217	lengsin, lens protein with glutamine synthetase domain [Source:MGI Symbol;Acc:MGI:2672844]	0	0	0	0	0	0	0	0	0	0	NA	NA	NA	NA	NA	no	0	NA	NA	NA	NA	NA	no	0	NA	NA	NA	NA	NA	no
Pih1d3	1	31222838	ENSMUSG00000026063	PIH1 domain containing 3 [Source:MGI Symbol;Acc:MGI:1921958]	0	0	0	0	0	0	0	0	0	0	NA	NA	NA	NA	NA	no	0	NA	NA	NA	NA	NA	no	0	NA	NA	NA	NA	NA	no
Gm26145	1	31259593	ENSMUSG00000077664	predicted gene, 26145 [Source:MGI Symbol;Acc:MGI:5455922]	0	0	0	0	0	0	0	0	0	0	NA	NA	NA	NA	NA	no	0	NA	NA	NA	NA	NA	no	0	NA	NA	NA	NA	NA	no
Gm4850	1	31267326	ENSMUSG00000100205	predicted pseudogene 4850 [Source:MGI Symbol;Acc:MGI:3647946]	0	0	0	0	0	0	0	0	0	0	NA	NA	NA	NA	NA	no	0	NA	NA	NA	NA	NA	no	0	NA	NA	NA	NA	NA	no
Gm28645	1	31274892	ENSMUSG00000100592	predicted gene 28645 [Source:MGI Symbol;Acc:MGI:5579351]	0	0	0	0	0	0	0	0	0	0	NA	NA	NA	NA	NA	no	0	NA	NA	NA	NA	NA	no	0	NA	NA	NA	NA	NA	no
Gm6489	1	31286945	ENSMUSG00000094215	predicted gene 6489 [Source:MGI Symbol;Acc:MGI:3646684]	0	0	0	0	0	0	0	0	0	0	NA	NA	NA	NA	NA	no	0	NA	NA	NA	NA	NA	no	0	NA	NA	NA	NA	NA	no
Gm10307	1	31559540	ENSMUSG00000101093	predicted gene 10307 [Source:MGI Symbol;Acc:MGI:3642371]	0	0	0	0	0	0	0	0	0	0	NA	NA	NA	NA	NA	no	0	NA	NA	NA	NA	NA	no	0	NA	NA	NA	NA	NA	no
Gm19680	1	31615149	ENSMUSG00000070960	predicted gene, 19680 [Source:MGI Symbol;Acc:MGI:5011865]	0	0	0	0	0	0	0	0	0	0	NA	NA	NA	NA	NA	no	0	NA	NA	NA	NA	NA	no	0	NA	NA	NA	NA	NA	no
Gm23032	1	31656632	ENSMUSG00000088620	predicted gene, 23032 [Source:MGI Symbol;Acc:MGI:5452809]	0	0	0	0	0	0	0	0	0	0	NA	NA	NA	NA	NA	no	0	NA	NA	NA	NA	NA	no	0	NA	NA	NA	NA	NA	no
Gm7910	1	31736057	ENSMUSG00000082159	predicted gene 7910 [Source:MGI Symbol;Acc:MGI:3645646]	0	0	0	0	0	0	0	0	0	0	NA	NA	NA	NA	NA	no	0	NA	NA	NA	NA	NA	no	0	NA	NA	NA	NA	NA	no
Khdrbs2	1	32172714	ENSMUSG00000026058	KH domain containing, RNA binding, signal transduction associated 2 [Source:MGI Symbol;Acc:MGI:2159649]	0	0	0	0	0	0	0	0	0	0	NA	NA	NA	NA	NA	no	0	NA	NA	NA	NA	NA	no	0	NA	NA	NA	NA	NA	no
Gm25814	1	32213133	ENSMUSG00000064688	predicted gene, 25814 [Source:MGI Symbol;Acc:MGI:5455591]	0	0	0	0	0	0	0	0	0	0	NA	NA	NA	NA	NA	no	0	NA	NA	NA	NA	NA	no	0	NA	NA	NA	NA	NA	no
Gm37999	1	32473757	ENSMUSG00000103482	predicted gene, 37999 [Source:MGI Symbol;Acc:MGI:5611227]	0	0	0	0	0	0	0	0	0	0	NA	NA	NA	NA	NA	no	0	NA	NA	NA	NA	NA	no	0	NA	NA	NA	NA	NA	no
Gm37110	1	32485315	ENSMUSG00000104498	predicted gene, 37110 [Source:MGI Symbol;Acc:MGI:5610338]	0	0	0	0	0	0	0	0	0	0	NA	NA	NA	NA	NA	no	0	NA	NA	NA	NA	NA	no	0	NA	NA	NA	NA	NA	no
Gm37911	1	32496444	ENSMUSG00000104313	predicted gene, 37911 [Source:MGI Symbol;Acc:MGI:5611139]	0	0	0	0	0	0	0	0	0	0	NA	NA	NA	NA	NA	no	0	NA	NA	NA	NA	NA	no	0	NA	NA	NA	NA	NA	no
Gm9839	1	32519563	ENSMUSG00000102865	predicted gene 9839 [Source:MGI Symbol;Acc:MGI:3641910]	0	0	0	0	0	0	0	0	0	0	NA	NA	NA	NA	NA	no	0	NA	NA	NA	NA	NA	no	0	NA	NA	NA	NA	NA	no
Gm37792	1	32539028	ENSMUSG00000102321	predicted gene, 37792 [Source:MGI Symbol;Acc:MGI:5611020]	0	0	0	0	0	0	0	0	0	0	NA	NA	NA	NA	NA	no	0	NA	NA	NA	NA	NA	no	0	NA	NA	NA	NA	NA	no
Gm5415	1	32543686	ENSMUSG00000091318	predicted gene 5415 [Source:MGI Symbol;Acc:MGI:3644687]	0	0	0	0	0	0	0	0	0	0	NA	NA	NA	NA	NA	no	0	NA	NA	NA	NA	NA	no	0	NA	NA	NA	NA	NA	no
Gm24732	1	32568359	ENSMUSG00000089489	predicted gene, 24732 [Source:MGI Symbol;Acc:MGI:5454509]	0	0	0	0	0	0	0	0	0	0	NA	NA	NA	NA	NA	no	0	NA	NA	NA	NA	NA	no	0	NA	NA	NA	NA	NA	no
Gm37426	1	32710179	ENSMUSG00000104433	predicted gene, 37426 [Source:MGI Symbol;Acc:MGI:5610654]	0	0	0	0	0	0	0	0	0	0	NA	NA	NA	NA	NA	no	0	NA	NA	NA	NA	NA	no	0	NA	NA	NA	NA	NA	no
Gm23024	1	32726639	ENSMUSG00000089395	predicted gene, 23024 [Source:MGI Symbol;Acc:MGI:5452801]	0	0	0	0	0	0	0	0	0	0	NA	NA	NA	NA	NA	no	0	NA	NA	NA	NA	NA	no	0	NA	NA	NA	NA	NA	no
Gm37151	1	32967484	ENSMUSG00000102926	predicted gene, 37151 [Source:MGI Symbol;Acc:MGI:5610379]	0	0	0	0	0	0	0	0	0	0	NA	NA	NA	NA	NA	no	0	NA	NA	NA	NA	NA	no	0	NA	NA	NA	NA	NA	no
Gm28624	1	33028160	ENSMUSG00000100497	predicted gene 28624 [Source:MGI Symbol;Acc:MGI:5579330]	0	0	0	0	0	0	0	0	0	0	NA	NA	NA	NA	NA	no	0	NA	NA	NA	NA	NA	no	0	NA	NA	NA	NA	NA	no
Gm37724	1	33065130	ENSMUSG00000102917	predicted gene, 37724 [Source:MGI Symbol;Acc:MGI:5610952]	0	0	0	0	0	0	0	0	0	0	NA	NA	NA	NA	NA	no	0	NA	NA	NA	NA	NA	no	0	NA	NA	NA	NA	NA	no
Gm7114	1	33100907	ENSMUSG00000100481	predicted gene 7114 [Source:MGI Symbol;Acc:MGI:3643085]	0	0	0	0	0	0	0	0	0	0	NA	NA	NA	NA	NA	no	0	NA	NA	NA	NA	NA	no	0	NA	NA	NA	NA	NA	no
Gm4785	1	33108905	ENSMUSG00000100590	predicted gene 4785 [Source:MGI Symbol;Acc:MGI:3646908]	0	0	0	0	0	0	0	0	0	0	NA	NA	NA	NA	NA	no	0	NA	NA	NA	NA	NA	no	0	NA	NA	NA	NA	NA	no
Gm24901	1	33191993	ENSMUSG00000088750	predicted gene, 24901 [Source:MGI Symbol;Acc:MGI:5454678]	0	0	0	0	0	0	0	0	0	0	NA	NA	NA	NA	NA	no	0	NA	NA	NA	NA	NA	no	0	NA	NA	NA	NA	NA	no
Gm37591	1	33212774	ENSMUSG00000104230	predicted gene, 37591 [Source:MGI Symbol;Acc:MGI:5610819]	0	0	0	0	0	0	0	0	0	0	NA	NA	NA	NA	NA	no	0	NA	NA	NA	NA	NA	no	0	NA	NA	NA	NA	NA	no
Gm2987	1	33235939	ENSMUSG00000101754	predicted gene 2987 [Source:MGI Symbol;Acc:MGI:3781165]	0	0	0	0	0	0	0	0	0	0	NA	NA	NA	NA	NA	no	0	NA	NA	NA	NA	NA	no	0	NA	NA	NA	NA	NA	no
Gm25792	1	33293676	ENSMUSG00000065223	predicted gene, 25792 [Source:MGI Symbol;Acc:MGI:5455569]	0	0	0	0	0	0	0	0	0	0	NA	NA	NA	NA	NA	no	0	NA	NA	NA	NA	NA	no	0	NA	NA	NA	NA	NA	no
Gm18799	1	33315670	ENSMUSG00000100318	predicted gene, 18799 [Source:MGI Symbol;Acc:MGI:5010984]	0	0	0	0	0	0	0	0	0	0	NA	NA	NA	NA	NA	no	0	NA	NA	NA	NA	NA	no	0	NA	NA	NA	NA	NA	no
Gm7933	1	33371331	ENSMUSG00000101612	predicted gene 7933 [Source:MGI Symbol;Acc:MGI:3643452]	0	0	0	0	0	0	0	0	0	0	NA	NA	NA	NA	NA	no	0	NA	NA	NA	NA	NA	no	0	NA	NA	NA	NA	NA	no
Gm23453	1	33422733	ENSMUSG00000065260	predicted gene, 23453 [Source:MGI Symbol;Acc:MGI:5453230]	0	0	0	0	0	0	0	0	0	0	NA	NA	NA	NA	NA	no	0	NA	NA	NA	NA	NA	no	0	NA	NA	NA	NA	NA	no
Prim2	1	33453810	ENSMUSG00000026134	DNA primase, p58 subunit [Source:MGI Symbol;Acc:MGI:97758]	37	56	155	24	0	0	0	0	1	31.5302	6.31232	1.92907	3.27221	0.00106709	0.0519704	no	31.5302	3.35892	1.93667	1.73438	0.0828508	0.651292	no	31.5302	2.9534	1.86419	1.58428	0.113129	0.755405	no
Gm29228	1	33482101	ENSMUSG00000101682	predicted gene 29228 [Source:MGI Symbol;Acc:MGI:5579934]	13	10	15	14	10	4	7	6	7	8.95299	1.3214	1.07455	1.22973	0.2188	NA	no	8.95299	0.800639	1.08043	0.741039	0.45867	1	no	8.95299	0.520761	1.06385	0.489507	0.624483	1	no
Gm37618	1	33613758	ENSMUSG00000102714	predicted gene, 37618 [Source:MGI Symbol;Acc:MGI:5610846]	0	0	0	0	0	0	0	0	0	0	NA	NA	NA	NA	NA	no	0	NA	NA	NA	NA	NA	no	0	NA	NA	NA	NA	NA	no
Gm17813	1	33657781	ENSMUSG00000102093	predicted gene, 17813 [Source:MGI Symbol;Acc:MGI:5009998]	0	0	0	0	0	0	0	0	0	0	NA	NA	NA	NA	NA	no	0	NA	NA	NA	NA	NA	no	0	NA	NA	NA	NA	NA	no
1700001G17Rik	1	33669824	ENSMUSG00000103746	RIKEN cDNA 1700001G17 gene [Source:MGI Symbol;Acc:MGI:1914753]	0	0	0	0	0	0	0	0	0	0	NA	NA	NA	NA	NA	no	0	NA	NA	NA	NA	NA	no	0	NA	NA	NA	NA	NA	no
Gm38173	1	33671915	ENSMUSG00000102198	predicted gene, 38173 [Source:MGI Symbol;Acc:MGI:5611401]	0	0	0	0	0	0	0	0	0	0	NA	NA	NA	NA	NA	no	0	NA	NA	NA	NA	NA	no	0	NA	NA	NA	NA	NA	no
Rab23	1	33719887	ENSMUSG00000004768	RAB23, member RAS oncogene family [Source:MGI Symbol;Acc:MGI:99833]	1	213	0	0	0	5	0	6	0	31.3739	4.30327	2.25626	1.90726	NA	NA	no	31.3739	0.024282	2.26592	0.0107162	NA	NA	no	31.3739	4.27898	2.25816	1.8949	NA	NA	no
Bag2	1	33745484	ENSMUSG00000042215	BCL2-associated athanogene 2 [Source:MGI Symbol;Acc:MGI:1891254]	0	0	0	0	0	0	0	17	0	1.2822	-2.85532	2.38843	-1.19548	NA	NA	no	1.2822	-2.94761	2.38843	-1.23412	NA	NA	no	1.2822	0	2.40591	0	NA	NA	no
Gm37905	1	33748007	ENSMUSG00000103072	predicted gene, 37905 [Source:MGI Symbol;Acc:MGI:5611133]	0	0	0	0	0	0	0	0	0	0	NA	NA	NA	NA	NA	no	0	NA	NA	NA	NA	NA	no	0	NA	NA	NA	NA	NA	no
Zfp451	1	33761545	ENSMUSG00000042197	zinc finger protein 451 [Source:MGI Symbol;Acc:MGI:2137896]	125	3	89	1	1	309	2	686	30	106.021	-1.11147	1.77612	-0.625787	0.531455	0.99208	no	106.021	-0.792453	1.77571	-0.446274	0.655399	1	no	106.021	-0.319019	1.77666	-0.179561	0.857497	1	no
Gm15455	1	33836124	ENSMUSG00000081402	predicted gene 15455 [Source:MGI Symbol;Acc:MGI:3705563]	0	0	0	0	0	0	0	0	0	0	NA	NA	NA	NA	NA	no	0	NA	NA	NA	NA	NA	no	0	NA	NA	NA	NA	NA	no
Bend6	1	33852052	ENSMUSG00000042182	BEN domain containing 6 [Source:MGI Symbol;Acc:MGI:2444572]	0	0	0	0	0	0	0	0	0	0	NA	NA	NA	NA	NA	no	0	NA	NA	NA	NA	NA	no	0	NA	NA	NA	NA	NA	no
Gm37067	1	33889490	ENSMUSG00000104416	predicted gene, 37067 [Source:MGI Symbol;Acc:MGI:5610295]	0	0	0	0	0	0	0	0	0	0	NA	NA	NA	NA	NA	no	0	NA	NA	NA	NA	NA	no	0	NA	NA	NA	NA	NA	no
Dst	1	33908225	ENSMUSG00000026131	dystonin [Source:MGI Symbol;Acc:MGI:104627]	0	0	0	0	0	163	1	0	40	19.4394	-2.84654	2.36883	-1.20167	NA	NA	no	19.4394	1.28261	2.35916	0.543671	NA	NA	no	19.4394	-4.12915	2.36834	-1.74348	NA	NA	no
Gm37354	1	33922455	ENSMUSG00000103596	predicted gene, 37354 [Source:MGI Symbol;Acc:MGI:5610582]	0	0	0	0	0	0	0	0	0	0	NA	NA	NA	NA	NA	no	0	NA	NA	NA	NA	NA	no	0	NA	NA	NA	NA	NA	no
Gm28631	1	33963352	ENSMUSG00000099382	predicted gene 28631 [Source:MGI Symbol;Acc:MGI:5579337]	0	0	0	0	0	0	0	0	0	0	NA	NA	NA	NA	NA	no	0	NA	NA	NA	NA	NA	no	0	NA	NA	NA	NA	NA	no
Gm23792	1	33981410	ENSMUSG00000084506	predicted gene, 23792 [Source:MGI Symbol;Acc:MGI:5453569]	0	0	0	0	0	0	0	0	0	0	NA	NA	NA	NA	NA	no	0	NA	NA	NA	NA	NA	no	0	NA	NA	NA	NA	NA	no
Gm38157	1	34032100	ENSMUSG00000103364	predicted gene, 38157 [Source:MGI Symbol;Acc:MGI:5611385]	0	0	6	0	0	0	0	0	0	0.671562	2.51686	2.39466	1.05103	0.293245	NA	no	0.671562	0	2.40591	0	1	NA	no	0.671562	2.31299	2.39466	0.965892	0.334098	NA	no
Mir6896	1	34117359	ENSMUSG00000105982	microRNA 6896 [Source:MGI Symbol;Acc:MGI:5562721]	0	0	0	0	0	0	0	0	0	0	NA	NA	NA	NA	NA	no	0	NA	NA	NA	NA	NA	no	0	NA	NA	NA	NA	NA	no
Gm26788	1	34165856	ENSMUSG00000096992	predicted gene, 26788 [Source:MGI Symbol;Acc:MGI:5477282]	1	0	0	0	0	0	0	0	0	0.0938667	0.863238	2.40591	0.358799	0.719746	NA	no	0.0938667	0	2.40591	0	1	NA	no	0.0938667	0.659364	2.40591	0.27406	0.784039	NA	no
A930005N03Rik	1	34269882	ENSMUSG00000103001	RIKEN cDNA A930005N03 gene [Source:MGI Symbol;Acc:MGI:1924441]	0	0	0	0	0	0	0	0	0	0	NA	NA	NA	NA	NA	no	0	NA	NA	NA	NA	NA	no	0	NA	NA	NA	NA	NA	no
Gm37958	1	34329433	ENSMUSG00000104397	predicted gene, 37958 [Source:MGI Symbol;Acc:MGI:5611186]	0	0	0	0	0	0	0	0	0	0	NA	NA	NA	NA	NA	no	0	NA	NA	NA	NA	NA	no	0	NA	NA	NA	NA	NA	no
Gm37385	1	34350775	ENSMUSG00000102839	predicted gene, 37385 [Source:MGI Symbol;Acc:MGI:5610613]	0	0	0	0	0	0	0	0	0	0	NA	NA	NA	NA	NA	no	0	NA	NA	NA	NA	NA	no	0	NA	NA	NA	NA	NA	no
Gm5266	1	34367371	ENSMUSG00000101206	predicted gene 5266 [Source:MGI Symbol;Acc:MGI:3646119]	0	0	0	0	0	0	0	0	0	0	NA	NA	NA	NA	NA	no	0	NA	NA	NA	NA	NA	no	0	NA	NA	NA	NA	NA	no
Gm3052	1	34415050	ENSMUSG00000101462	predicted gene 3052 [Source:MGI Symbol;Acc:MGI:3781230]	0	0	0	0	0	0	0	0	0	0	NA	NA	NA	NA	NA	no	0	NA	NA	NA	NA	NA	no	0	NA	NA	NA	NA	NA	no
Gm37233	1	34427002	ENSMUSG00000102336	predicted gene, 37233 [Source:MGI Symbol;Acc:MGI:5610461]	0	0	0	0	0	0	1	0	0	0.065138	-0.270919	2.40591	-0.112606	0.910343	NA	no	0.065138	-0.363204	2.40591	-0.150963	0.880005	NA	no	0.065138	0	2.40591	0	1	NA	no
Mir5103	1	34433121	ENSMUSG00000092852	microRNA 5103 [Source:MGI Symbol;Acc:MGI:4950423]	0	0	0	0	0	0	0	0	0	0	NA	NA	NA	NA	NA	no	0	NA	NA	NA	NA	NA	no	0	NA	NA	NA	NA	NA	no
Ccdc115	1	34436670	ENSMUSG00000042111	coiled-coil domain containing 115 [Source:MGI Symbol;Acc:MGI:1916918]	242	785	215	443	169	255	61	123	109	273.66	2.57346	0.912544	2.82009	0.00480103	0.127871	no	273.66	1.78508	0.912937	1.95531	0.050546	0.501781	no	273.66	0.788376	0.910541	0.865833	0.386582	1	no
Gm28306	1	34439511	ENSMUSG00000101711	predicted gene 28306 [Source:MGI Symbol;Acc:MGI:5579012]	0	0	0	0	0	0	0	0	0	0	NA	NA	NA	NA	NA	no	0	NA	NA	NA	NA	NA	no	0	NA	NA	NA	NA	NA	no
Imp4	1	34439851	ENSMUSG00000026127	IMP4, U3 small nucleolar ribonucleoprotein [Source:MGI Symbol;Acc:MGI:106572]	68	358	31	31	51	30	163	164	84	104.508	0.883058	1.04201	0.847455	0.396742	0.969945	no	104.508	-1.38957	1.04731	-1.3268	0.184576	0.915972	no	104.508	2.27263	1.04681	2.171	0.0299311	0.380125	no
Ptpn18	1	34459762	ENSMUSG00000026126	protein tyrosine phosphatase, non-receptor type 18 [Source:MGI Symbol;Acc:MGI:108410]	1787	1403	1118	1545	1437	1549	5418	1498	589	1487.82	-0.099846	0.773699	-0.12905	0.897318	1	no	1487.82	-0.179088	0.77368	-0.231475	0.816946	1	no	1487.82	0.0792418	0.773776	0.102409	0.918432	1	no
Gm28417	1	34468834	ENSMUSG00000100280	predicted gene 28417 [Source:MGI Symbol;Acc:MGI:5579123]	0	107	0	0	0	0	0	0	0	15.2537	5.90159	2.38472	2.47475	NA	NA	no	15.2537	0	2.40585	0	NA	NA	no	15.2537	5.82771	2.3848	2.44369	NA	NA	no
4930568A12Rik	1	34477167	ENSMUSG00000101223	RIKEN cDNA 4930568A12 gene [Source:MGI Symbol;Acc:MGI:1923133]	0	0	0	0	0	0	0	0	0	0	NA	NA	NA	NA	NA	no	0	NA	NA	NA	NA	NA	no	0	NA	NA	NA	NA	NA	no
Prss39	1	34498410	ENSMUSG00000026125	protease, serine 39 [Source:MGI Symbol;Acc:MGI:1270856]	0	0	0	0	0	0	0	0	0	0	NA	NA	NA	NA	NA	no	0	NA	NA	NA	NA	NA	no	0	NA	NA	NA	NA	NA	no
Gm28416	1	34523716	ENSMUSG00000101116	predicted gene 28416 [Source:MGI Symbol;Acc:MGI:5579122]	0	0	0	0	0	0	0	0	0	0	NA	NA	NA	NA	NA	no	0	NA	NA	NA	NA	NA	no	0	NA	NA	NA	NA	NA	no
Cfc1	1	34535648	ENSMUSG00000026124	cripto, FRL-1, cryptic family 1 [Source:MGI Symbol;Acc:MGI:109448]	0	0	0	0	0	0	0	0	0	0	NA	NA	NA	NA	NA	no	0	NA	NA	NA	NA	NA	no	0	NA	NA	NA	NA	NA	no
Gm28419	1	34538086	ENSMUSG00000101803	predicted gene 28419 [Source:MGI Symbol;Acc:MGI:5579125]	0	0	0	0	0	0	0	0	0	0	NA	NA	NA	NA	NA	no	0	NA	NA	NA	NA	NA	no	0	NA	NA	NA	NA	NA	no
Prss40	1	34543968	ENSMUSG00000037529	protease, serine 40 [Source:MGI Symbol;Acc:MGI:1270857]	0	0	0	0	0	0	0	0	0	0	NA	NA	NA	NA	NA	no	0	NA	NA	NA	NA	NA	no	0	NA	NA	NA	NA	NA	no
1700101I19Rik	1	34579202	ENSMUSG00000045815	RIKEN cDNA 1700101I19 gene [Source:MGI Symbol;Acc:MGI:1920839]	0	0	0	0	0	0	0	0	0	0	NA	NA	NA	NA	NA	no	0	NA	NA	NA	NA	NA	no	0	NA	NA	NA	NA	NA	no
Amer3	1	34579657	ENSMUSG00000045174	APC membrane recruitment 3 [Source:MGI Symbol;Acc:MGI:3026939]	0	0	0	0	0	0	0	0	0	0	NA	NA	NA	NA	NA	no	0	NA	NA	NA	NA	NA	no	0	NA	NA	NA	NA	NA	no
Gm28418	1	34607297	ENSMUSG00000100524	predicted gene 28418 [Source:MGI Symbol;Acc:MGI:5579124]	0	0	0	0	0	0	0	0	0	0	NA	NA	NA	NA	NA	no	0	NA	NA	NA	NA	NA	no	0	NA	NA	NA	NA	NA	no
Gm36984	1	34610572	ENSMUSG00000102499	predicted gene, 36984 [Source:MGI Symbol;Acc:MGI:5610212]	0	0	0	0	0	0	0	0	0	0	NA	NA	NA	NA	NA	no	0	NA	NA	NA	NA	NA	no	0	NA	NA	NA	NA	NA	no
Gm29730	1	34610908	ENSMUSG00000103521	predicted gene, 29730 [Source:MGI Symbol;Acc:MGI:5588889]	0	0	0	0	0	0	0	0	0	0	NA	NA	NA	NA	NA	no	0	NA	NA	NA	NA	NA	no	0	NA	NA	NA	NA	NA	no
AA619741	1	34635544	ENSMUSG00000104098	expressed sequence AA619741 [Source:MGI Symbol;Acc:MGI:3035322]	0	0	0	0	0	0	0	0	0	0	NA	NA	NA	NA	NA	no	0	NA	NA	NA	NA	NA	no	0	NA	NA	NA	NA	NA	no
Arhgef4	1	34678188	ENSMUSG00000037509	Rho guanine nucleotide exchange factor (GEF) 4 [Source:MGI Symbol;Acc:MGI:2442507]	0	0	0	0	0	0	0	0	0	0	NA	NA	NA	NA	NA	no	0	NA	NA	NA	NA	NA	no	0	NA	NA	NA	NA	NA	no
Gm37224	1	34752775	ENSMUSG00000102537	predicted gene, 37224 [Source:MGI Symbol;Acc:MGI:5610452]	0	0	0	0	0	0	0	0	0	0	NA	NA	NA	NA	NA	no	0	NA	NA	NA	NA	NA	no	0	NA	NA	NA	NA	NA	no
Gm37845	1	34753123	ENSMUSG00000102612	predicted gene, 37845 [Source:MGI Symbol;Acc:MGI:5611073]	0	0	0	0	0	0	0	0	0	0	NA	NA	NA	NA	NA	no	0	NA	NA	NA	NA	NA	no	0	NA	NA	NA	NA	NA	no
Gm38336	1	34809360	ENSMUSG00000104002	predicted gene, 38336 [Source:MGI Symbol;Acc:MGI:5611564]	0	0	0	0	0	0	0	0	0	0	NA	NA	NA	NA	NA	no	0	NA	NA	NA	NA	NA	no	0	NA	NA	NA	NA	NA	no
Fam168b	1	34813219	ENSMUSG00000037503	family with sequence similarity 168, member B [Source:MGI Symbol;Acc:MGI:2448487]	708	117	373	834	369	903	227	697	566	467.031	-0.034201	0.846112	-0.0404213	0.967757	1	no	467.031	0.71881	0.845637	0.850022	0.395313	1	no	467.031	-0.753011	0.845943	-0.890144	0.373389	1	no
Gm37127	1	34823525	ENSMUSG00000104358	predicted gene, 37127 [Source:MGI Symbol;Acc:MGI:5610355]	0	0	0	0	0	0	0	0	0	0	NA	NA	NA	NA	NA	no	0	NA	NA	NA	NA	NA	no	0	NA	NA	NA	NA	NA	no
Plekhb2	1	34849976	ENSMUSG00000026123	pleckstrin homology domain containing, family B (evectins) member 2 [Source:MGI Symbol;Acc:MGI:2385825]	119	166	528	933	100	594	337	117	201	313.724	0.807079	0.992779	0.812949	0.416247	0.978551	no	313.724	1.60583	0.992247	1.61838	0.105581	0.725476	no	313.724	-0.798753	0.991982	-0.805209	0.420699	1	no
Gm19430	1	34928509	ENSMUSG00000103716	predicted gene, 19430 [Source:MGI Symbol;Acc:MGI:5011615]	0	0	0	0	0	0	0	0	0	0	NA	NA	NA	NA	NA	no	0	NA	NA	NA	NA	NA	no	0	NA	NA	NA	NA	NA	no
Gm37670	1	34969627	ENSMUSG00000103548	predicted gene, 37670 [Source:MGI Symbol;Acc:MGI:5610898]	0	0	0	0	0	0	0	0	0	0	NA	NA	NA	NA	NA	no	0	NA	NA	NA	NA	NA	no	0	NA	NA	NA	NA	NA	no
Gm8009	1	34970065	ENSMUSG00000103760	predicted gene 8009 [Source:MGI Symbol;Acc:MGI:3648650]	0	0	0	0	0	0	0	0	0	0	NA	NA	NA	NA	NA	no	0	NA	NA	NA	NA	NA	no	0	NA	NA	NA	NA	NA	no
Gm38027	1	34985656	ENSMUSG00000103997	predicted gene, 38027 [Source:MGI Symbol;Acc:MGI:5611255]	0	0	0	0	0	0	0	0	0	0	NA	NA	NA	NA	NA	no	0	NA	NA	NA	NA	NA	no	0	NA	NA	NA	NA	NA	no
Gm25096	1	35178956	ENSMUSG00000077231	predicted gene, 25096 [Source:MGI Symbol;Acc:MGI:5454873]	0	0	0	0	0	0	0	0	0	0	NA	NA	NA	NA	NA	no	0	NA	NA	NA	NA	NA	no	0	NA	NA	NA	NA	NA	no
Gm37068	1	35625606	ENSMUSG00000104417	predicted gene, 37068 [Source:MGI Symbol;Acc:MGI:5610296]	0	0	0	0	0	0	0	0	0	0	NA	NA	NA	NA	NA	no	0	NA	NA	NA	NA	NA	no	0	NA	NA	NA	NA	NA	no
Gm25634	1	35761602	ENSMUSG00000064601	predicted gene, 25634 [Source:MGI Symbol;Acc:MGI:5455411]	0	0	0	0	0	0	0	0	0	0	NA	NA	NA	NA	NA	no	0	NA	NA	NA	NA	NA	no	0	NA	NA	NA	NA	NA	no
Gm28415	1	35806974	ENSMUSG00000101714	predicted gene 28415 [Source:MGI Symbol;Acc:MGI:5579121]	0	0	0	0	0	0	0	0	0	0	NA	NA	NA	NA	NA	no	0	NA	NA	NA	NA	NA	no	0	NA	NA	NA	NA	NA	no
1110002O04Rik	1	35879845	ENSMUSG00000102531	RIKEN cDNA 1110002O04 gene [Source:MGI Symbol;Acc:MGI:1915733]	0	0	0	0	0	0	0	0	0	0	NA	NA	NA	NA	NA	no	0	NA	NA	NA	NA	NA	no	0	NA	NA	NA	NA	NA	no
Gm8022	1	35958919	ENSMUSG00000103096	predicted gene 8022 [Source:MGI Symbol;Acc:MGI:3647993]	0	0	0	0	0	0	0	0	0	0	NA	NA	NA	NA	NA	no	0	NA	NA	NA	NA	NA	no	0	NA	NA	NA	NA	NA	no
Gm37146	1	35981960	ENSMUSG00000102279	predicted gene, 37146 [Source:MGI Symbol;Acc:MGI:5610374]	0	0	0	0	0	0	0	0	0	0	NA	NA	NA	NA	NA	no	0	NA	NA	NA	NA	NA	no	0	NA	NA	NA	NA	NA	no
Gm33222	1	36002985	ENSMUSG00000103708	predicted gene, 33222 [Source:MGI Symbol;Acc:MGI:5592381]	0	0	0	0	0	0	0	0	0	0	NA	NA	NA	NA	NA	no	0	NA	NA	NA	NA	NA	no	0	NA	NA	NA	NA	NA	no
4930535G08Rik	1	36011072	ENSMUSG00000104201	RIKEN cDNA 4930535G08 gene [Source:MGI Symbol;Acc:MGI:1925283]	0	0	0	0	0	0	0	0	0	0	NA	NA	NA	NA	NA	no	0	NA	NA	NA	NA	NA	no	0	NA	NA	NA	NA	NA	no
Gm38049	1	36029647	ENSMUSG00000102434	predicted gene, 38049 [Source:MGI Symbol;Acc:MGI:5611277]	0	0	0	0	0	0	0	0	0	0	NA	NA	NA	NA	NA	no	0	NA	NA	NA	NA	NA	no	0	NA	NA	NA	NA	NA	no
Hs6st1	1	36068400	ENSMUSG00000045216	heparan sulfate 6-O-sulfotransferase 1 [Source:MGI Symbol;Acc:MGI:1354958]	211	2	8	20	81	0	1	1	2	32.2029	4.93619	1.72862	2.85556	0.0042961	0.121683	no	32.2029	4.09737	1.72986	2.36862	0.0178547	0.282361	no	32.2029	0.838816	1.68579	0.49758	0.61878	1	no
Gm37335	1	36105384	ENSMUSG00000104523	predicted gene, 37335 [Source:MGI Symbol;Acc:MGI:5610563]	0	0	0	0	0	0	0	0	0	0	NA	NA	NA	NA	NA	no	0	NA	NA	NA	NA	NA	no	0	NA	NA	NA	NA	NA	no
Gm33280	1	36132042	ENSMUSG00000102202	predicted gene, 33280 [Source:MGI Symbol;Acc:MGI:5592439]	0	0	0	0	2	0	0	0	0	0.214315	0	2.40591	0	1	NA	no	0.214315	1.3542	2.40551	0.562958	0.573464	NA	no	0.214315	-1.05804	2.40551	-0.439841	0.660052	NA	no
Uggt1	1	36140027	ENSMUSG00000037470	UDP-glucose glycoprotein glucosyltransferase 1 [Source:MGI Symbol;Acc:MGI:2443162]	319	170	139	999	797	409	362	427	95	367.936	0.0773567	0.749593	0.103198	0.917806	1	no	367.936	1.7712	0.748084	2.36765	0.0179015	0.282361	no	367.936	-1.69384	0.748603	-2.26267	0.0236558	0.337038	no
Mir6897	1	36144252	ENSMUSG00000098752	microRNA 6897 [Source:MGI Symbol;Acc:MGI:5531034]	0	0	0	0	0	0	0	0	0	0	NA	NA	NA	NA	NA	no	0	NA	NA	NA	NA	NA	no	0	NA	NA	NA	NA	NA	no
Neurl3	1	36264597	ENSMUSG00000047180	neuralized E3 ubiquitin protein ligase 3 [Source:MGI Symbol;Acc:MGI:2429944]	173	195	173	0	127	75	528	332	307	176.315	-0.50456	1.27356	-0.396183	0.69197	1	no	176.315	-2.00743	1.27524	-1.57416	0.115451	0.750297	no	176.315	1.50287	1.2758	1.17799	0.238802	1	no
Arid5a	1	36307733	ENSMUSG00000037447	AT rich interactive domain 5A (MRF1-like) [Source:MGI Symbol;Acc:MGI:2443039]	98	5	27	49	99	58	7	69	71	47.5307	-0.028327	1.18845	-0.0238353	0.980984	1	no	47.5307	0.643427	1.18581	0.542607	0.5874	1	no	47.5307	-0.671754	1.18761	-0.565637	0.571641	1	no
4930403P22Rik	1	36332708	ENSMUSG00000102762	RIKEN cDNA 4930403P22 gene [Source:MGI Symbol;Acc:MGI:1921057]	0	0	0	0	0	0	0	0	0	0	NA	NA	NA	NA	NA	no	0	NA	NA	NA	NA	NA	no	0	NA	NA	NA	NA	NA	no
Kansl3	1	36335730	ENSMUSG00000010453	KAT8 regulatory NSL complex subunit 3 [Source:MGI Symbol;Acc:MGI:1918055]	318	32	0	304	57	75	65	191	129	113.098	0.0760981	1.47887	0.0514571	0.958961	1	no	113.098	0.457322	1.47838	0.309339	0.757063	1	no	113.098	-0.381224	1.47876	-0.2578	0.796562	1	no
Mir6898	1	36348682	ENSMUSG00000098680	microRNA 6898 [Source:MGI Symbol;Acc:MGI:5531198]	0	0	0	0	0	0	0	0	0	0	NA	NA	NA	NA	NA	no	0	NA	NA	NA	NA	NA	no	0	NA	NA	NA	NA	NA	no
Fer1l5	1	36372291	ENSMUSG00000037432	fer-1-like 5 (C. elegans) [Source:MGI Symbol;Acc:MGI:3616091]	0	0	0	0	0	0	0	0	0	0	NA	NA	NA	NA	NA	no	0	NA	NA	NA	NA	NA	no	0	NA	NA	NA	NA	NA	no
Lman2l	1	36419871	ENSMUSG00000001143	lectin, mannose-binding 2-like [Source:MGI Symbol;Acc:MGI:2443010]	0	1	121	0	0	98	0	1	0	22.8298	3.93646	2.30396	1.70856	NA	NA	no	22.8298	3.4948	2.30414	1.51675	NA	NA	no	22.8298	0.44166	2.29557	0.192397	NA	NA	no
Cnnm4	1	36471620	ENSMUSG00000037408	cyclin M4 [Source:MGI Symbol;Acc:MGI:2151060]	0	0	0	0	0	1	15	1	0	1.14503	-2.61914	2.38893	-1.09636	0.27292	NA	no	1.14503	-2.15184	2.38871	-0.900838	0.367675	NA	no	1.14503	-0.467299	2.40572	-0.194245	0.845984	NA	no
Gm37909	1	36473952	ENSMUSG00000104316	predicted gene, 37909 [Source:MGI Symbol;Acc:MGI:5611137]	0	0	0	0	0	0	0	0	0	0	NA	NA	NA	NA	NA	no	0	NA	NA	NA	NA	NA	no	0	NA	NA	NA	NA	NA	no
AC084391.1	1	36506562	ENSMUSG00000106081		0	0	0	0	0	0	0	0	0	0	NA	NA	NA	NA	NA	no	0	NA	NA	NA	NA	NA	no	0	NA	NA	NA	NA	NA	no
Cnnm3	1	36511867	ENSMUSG00000001138	cyclin M3 [Source:MGI Symbol;Acc:MGI:2151055]	156	119	49	1	106	208	228	291	36	108.469	-0.123595	1.28026	-0.0965394	0.923092	1	no	108.469	-0.374818	1.28036	-0.292744	0.769718	1	no	108.469	0.251223	1.28101	0.196113	0.844521	1	no
Gm38033	1	36527534	ENSMUSG00000102845	predicted gene, 38033 [Source:MGI Symbol;Acc:MGI:5611261]	0	0	0	0	0	0	0	0	0	0	NA	NA	NA	NA	NA	no	0	NA	NA	NA	NA	NA	no	0	NA	NA	NA	NA	NA	no
Ankrd23	1	36530188	ENSMUSG00000067653	ankyrin repeat domain 23 [Source:MGI Symbol;Acc:MGI:1925571]	0	0	0	0	0	0	0	0	0	0	NA	NA	NA	NA	NA	no	0	NA	NA	NA	NA	NA	no	0	NA	NA	NA	NA	NA	no
Gm42417	1	36530193	ENSMUSG00000109510	predicted gene, 42417 [Source:MGI Symbol;Acc:MGI:5649003]	0	0	0	0	0	0	0	0	0	0	NA	NA	NA	NA	NA	no	0	NA	NA	NA	NA	NA	no	0	NA	NA	NA	NA	NA	no
Ankrd39	1	36537507	ENSMUSG00000079610	ankyrin repeat domain 39 [Source:MGI Symbol;Acc:MGI:1914816]	0	0	99	0	0	0	1	0	47	16.1875	0.801788	2.35933	0.339838	NA	NA	no	16.1875	-3.09349	2.36848	-1.30611	NA	NA	no	16.1875	3.89528	2.3683	1.64476	NA	NA	no
Sema4c	1	36548639	ENSMUSG00000026121	sema domain, immunoglobulin domain (Ig), transmembrane domain (TM) and short cytoplasmic domain, (semaphorin) 4C [Source:MGI Symbol;Acc:MGI:109252]	0	27	0	0	0	0	0	0	56	9.85609	-0.460925	2.36045	-0.19527	NA	NA	no	9.85609	-3.62639	2.37265	-1.52841	NA	NA	no	9.85609	3.16546	2.3735	1.33367	NA	NA	no
D430040D24Rik	1	36557701	ENSMUSG00000087589	RIKEN cDNA D430040D24 gene [Source:MGI Symbol;Acc:MGI:2442526]	0	0	0	0	0	0	0	0	0	0	NA	NA	NA	NA	NA	no	0	NA	NA	NA	NA	NA	no	0	NA	NA	NA	NA	NA	no
Fam178b	1	36562692	ENSMUSG00000046337	family with sequence similarity 178, member B [Source:MGI Symbol;Acc:MGI:3026913]	0	0	0	0	0	0	0	0	0	0	NA	NA	NA	NA	NA	no	0	NA	NA	NA	NA	NA	no	0	NA	NA	NA	NA	NA	no
Gm6428	1	36601802	ENSMUSG00000089906	predicted pseudogene 6428 [Source:MGI Symbol;Acc:MGI:3649065]	0	0	0	0	0	0	0	0	0	0	NA	NA	NA	NA	NA	no	0	NA	NA	NA	NA	NA	no	0	NA	NA	NA	NA	NA	no
Gm24133	1	36663965	ENSMUSG00000077939	predicted gene, 24133 [Source:MGI Symbol;Acc:MGI:5453910]	0	0	0	0	0	0	0	0	0	0	NA	NA	NA	NA	NA	no	0	NA	NA	NA	NA	NA	no	0	NA	NA	NA	NA	NA	no
Cox5b	1	36691484	ENSMUSG00000061518	cytochrome c oxidase subunit Vb [Source:MGI Symbol;Acc:MGI:88475]	333	183	104	91	88	115	116	327	172	149.654	0.435603	0.736654	0.591326	0.554302	0.994378	no	149.654	-0.737735	0.738831	-0.998517	0.318029	1	no	149.654	1.17334	0.738913	1.58792	0.112304	0.753396	no
Actr1b	1	36698114	ENSMUSG00000037351	ARP1 actin-related protein 1B, centractin beta [Source:MGI Symbol;Acc:MGI:1917446]	9	208	1	1	0	65	1103	123	1	117.964	-1.17562	1.89019	-0.621957	0.53397	0.99208	no	117.964	-3.02338	1.8922	-1.59781	0.110085	0.736169	no	117.964	1.84776	1.89282	0.976192	0.32897	1	no
4933424G06Rik	1	36710149	ENSMUSG00000102416	RIKEN cDNA 4933424G06 gene [Source:MGI Symbol;Acc:MGI:1918416]	0	0	0	0	0	0	0	0	0	0	NA	NA	NA	NA	NA	no	0	NA	NA	NA	NA	NA	no	0	NA	NA	NA	NA	NA	no
Gm33533	1	36739048	ENSMUSG00000104237	predicted gene, 33533 [Source:MGI Symbol;Acc:MGI:5592692]	0	0	0	0	0	0	0	0	0	0	NA	NA	NA	NA	NA	no	0	NA	NA	NA	NA	NA	no	0	NA	NA	NA	NA	NA	no
Zap70	1	36761798	ENSMUSG00000026117	zeta-chain (TCR) associated protein kinase [Source:MGI Symbol;Acc:MGI:99613]	208	62	240	33	315	249	354	263	208	180.828	-0.230513	0.90481	-0.254764	0.798906	1	no	180.828	-0.106525	0.904422	-0.117782	0.90624	1	no	180.828	-0.123988	0.905242	-0.136967	0.891057	1	no
Gm18828	1	36764863	ENSMUSG00000097291	predicted gene, 18828 [Source:MGI Symbol;Acc:MGI:5011013]	0	0	0	0	0	0	0	0	0	0	NA	NA	NA	NA	NA	no	0	NA	NA	NA	NA	NA	no	0	NA	NA	NA	NA	NA	no
Tmem131	1	36792191	ENSMUSG00000026116	transmembrane protein 131 [Source:MGI Symbol;Acc:MGI:1927110]	0	3	0	105	0	73	0	0	354	56.6093	-3.86821	2.27688	-1.69891	0.0893361	0.585461	no	56.6093	-0.793059	2.27221	-0.349026	0.72707	1	no	56.6093	-3.07515	2.27717	-1.35043	0.17688	0.907383	no
Gm37506	1	36871903	ENSMUSG00000103016	predicted gene, 37506 [Source:MGI Symbol;Acc:MGI:5610734]	0	0	0	0	0	0	0	0	0	0	NA	NA	NA	NA	NA	no	0	NA	NA	NA	NA	NA	no	0	NA	NA	NA	NA	NA	no
Gm38115	1	36913601	ENSMUSG00000102930	predicted gene, 38115 [Source:MGI Symbol;Acc:MGI:5611343]	0	0	0	0	0	19	0	0	7	2.50908	-2.12453	2.38873	-0.889397	NA	NA	no	2.50908	0.866217	2.36743	0.365889	NA	NA	no	2.50908	-2.99075	2.3872	-1.25283	NA	NA	no
F830112A20Rik	1	36922797	ENSMUSG00000103159	RIKEN cDNA F830112A20 gene [Source:MGI Symbol;Acc:MGI:3641781]	0	0	0	0	0	0	0	0	0	0	NA	NA	NA	NA	NA	no	0	NA	NA	NA	NA	NA	no	0	NA	NA	NA	NA	NA	no
Rpl12-ps1	1	36957930	ENSMUSG00000080054	ribosomal protein L12, pseudogene 1 [Source:MGI Symbol;Acc:MGI:3646154]	10	2	5	14	7	4	2	5	16	6.65448	-0.259861	1.37882	-0.188465	0.850512	NA	no	6.65448	0.245999	1.36646	0.180027	0.857132	NA	no	6.65448	-0.505859	1.37987	-0.366598	0.713919	NA	no
n-R5s210	1	37005439	ENSMUSG00000095944	nuclear encoded rRNA 5S 210 [Source:MGI Symbol;Acc:MGI:4422075]	0	0	0	0	0	0	0	0	0	0	NA	NA	NA	NA	NA	no	0	NA	NA	NA	NA	NA	no	0	NA	NA	NA	NA	NA	no
Vwa3b	1	37026596	ENSMUSG00000050122	von Willebrand factor A domain containing 3B [Source:MGI Symbol;Acc:MGI:1918103]	0	0	0	1	0	0	0	0	0	0.109081	0	2.40591	0	1	NA	no	0.109081	0.770953	2.40591	0.320441	0.748634	NA	no	0.109081	-0.474794	2.40591	-0.197345	0.843558	NA	no
Gm37020	1	37132273	ENSMUSG00000103603	predicted gene, 37020 [Source:MGI Symbol;Acc:MGI:5610248]	0	0	0	0	0	0	0	0	0	0	NA	NA	NA	NA	NA	no	0	NA	NA	NA	NA	NA	no	0	NA	NA	NA	NA	NA	no
Cnga3	1	37214434	ENSMUSG00000026114	cyclic nucleotide gated channel alpha 3 [Source:MGI Symbol;Acc:MGI:1341818]	0	0	0	0	0	0	0	0	0	0	NA	NA	NA	NA	NA	no	0	NA	NA	NA	NA	NA	no	0	NA	NA	NA	NA	NA	no
1700074A21Rik	1	37299352	ENSMUSG00000102231	RIKEN cDNA 1700074A21 gene [Source:MGI Symbol;Acc:MGI:1920732]	0	0	0	0	0	0	0	0	0	0	NA	NA	NA	NA	NA	no	0	NA	NA	NA	NA	NA	no	0	NA	NA	NA	NA	NA	no
Inpp4a	1	37299865	ENSMUSG00000026113	inositol polyphosphate-4-phosphatase, type I [Source:MGI Symbol;Acc:MGI:1931123]	1	0	0	0	0	0	1	18	5	2.05297	-2.69975	2.3859	-1.13154	0.257827	NA	no	2.05297	-3.32586	2.38698	-1.39333	0.163519	NA	no	2.05297	0.626109	2.40501	0.260336	0.794605	NA	no
4930439A04Rik	1	37329667	ENSMUSG00000086064	RIKEN cDNA 4930439A04 gene [Source:MGI Symbol;Acc:MGI:1925369]	0	0	0	0	0	0	0	0	0	0	NA	NA	NA	NA	NA	no	0	NA	NA	NA	NA	NA	no	0	NA	NA	NA	NA	NA	no
Gm37135	1	37330971	ENSMUSG00000102879	predicted gene, 37135 [Source:MGI Symbol;Acc:MGI:5610363]	0	0	0	0	0	0	0	0	0	0	NA	NA	NA	NA	NA	no	0	NA	NA	NA	NA	NA	no	0	NA	NA	NA	NA	NA	no
Coa5	1	37417084	ENSMUSG00000026112	cytochrome C oxidase assembly factor 5 [Source:MGI Symbol;Acc:MGI:1923428]	289	3	201	234	148	344	73	176	123	154.493	0.642112	1.14779	0.559436	0.575864	1	no	154.493	1.15826	1.14716	1.00968	0.312651	1	no	154.493	-0.516146	1.14698	-0.450005	0.652707	1	no
Unc50	1	37430139	ENSMUSG00000026111	unc-50 homolog (C. elegans) [Source:MGI Symbol;Acc:MGI:1914637]	52	597	64	379	0	133	12	54	1	155.762	3.68729	1.66395	2.21599	0.0266924	0.317697	no	155.762	2.93419	1.66419	1.76314	0.0778769	0.630711	no	155.762	0.753099	1.66029	0.453594	0.650121	1	no
Mgat4a	1	37439340	ENSMUSG00000026110	mannoside acetylglucosaminyltransferase 4, isoenzyme A [Source:MGI Symbol;Acc:MGI:2662992]	0	0	0	1	0	0	367	189	0	38.2698	-7.05029	2.19721	-3.20875	0.00133313	0.0593081	no	38.2698	-6.34001	2.17392	-2.91639	0.00354107	0.108985	no	38.2698	-0.710278	2.24268	-0.316709	0.751464	1	no
4930594C11Rik	1	37485851	ENSMUSG00000103948	RIKEN cDNA 4930594C11 gene [Source:MGI Symbol;Acc:MGI:1924883]	0	0	0	0	0	0	0	0	0	0	NA	NA	NA	NA	NA	no	0	NA	NA	NA	NA	NA	no	0	NA	NA	NA	NA	NA	no
Gm43213	1	37487193	ENSMUSG00000087233	predicted gene 43213 [Source:MGI Symbol;Acc:MGI:5663350]	0	0	0	0	0	1	0	0	0	0.0925369	0	2.40591	0	1	NA	no	0.0925369	0.770953	2.40591	0.320441	0.748634	NA	no	0.0925369	-0.474794	2.40591	-0.197345	0.843558	NA	no
2010300C02Rik	1	37611677	ENSMUSG00000026090	RIKEN cDNA 2010300C02 gene [Source:MGI Symbol;Acc:MGI:1919347]	1	0	0	0	0	38	1	0	1	3.78267	-0.33747	2.39114	-0.141134	NA	NA	no	3.78267	2.84266	2.37308	1.19788	NA	NA	no	3.78267	-3.18013	2.38184	-1.33516	NA	NA	no
4930556I23Rik	1	37614259	ENSMUSG00000089767	RIKEN cDNA 4930556I23 gene [Source:MGI Symbol;Acc:MGI:1922520]	0	0	0	0	0	0	0	0	0	0	NA	NA	NA	NA	NA	no	0	NA	NA	NA	NA	NA	no	0	NA	NA	NA	NA	NA	no
4930470B04Rik	1	37660722	ENSMUSG00000104365	RIKEN cDNA 4930470B04 gene [Source:MGI Symbol;Acc:MGI:1923057]	0	0	0	0	0	0	0	0	0	0	NA	NA	NA	NA	NA	no	0	NA	NA	NA	NA	NA	no	0	NA	NA	NA	NA	NA	no
Gm19863	1	37694447	ENSMUSG00000102650	predicted gene, 19863 [Source:MGI Symbol;Acc:MGI:5012048]	0	0	0	0	0	0	0	0	0	0	NA	NA	NA	NA	NA	no	0	NA	NA	NA	NA	NA	no	0	NA	NA	NA	NA	NA	no
Tsga10	1	37754776	ENSMUSG00000060771	testis specific 10 [Source:MGI Symbol;Acc:MGI:2685063]	0	0	0	0	0	0	0	0	0	0	NA	NA	NA	NA	NA	no	0	NA	NA	NA	NA	NA	no	0	NA	NA	NA	NA	NA	no
Gm26805	1	37865299	ENSMUSG00000097268	predicted gene, 26805 [Source:MGI Symbol;Acc:MGI:5477299]	0	0	0	0	0	0	0	0	0	0	NA	NA	NA	NA	NA	no	0	NA	NA	NA	NA	NA	no	0	NA	NA	NA	NA	NA	no
Lipt1	1	37871738	ENSMUSG00000037216	lipoyltransferase 1 [Source:MGI Symbol;Acc:MGI:3645211]	0	0	0	0	0	0	0	0	0	0	NA	NA	NA	NA	NA	no	0	NA	NA	NA	NA	NA	no	0	NA	NA	NA	NA	NA	no
Mitd1	1	37874801	ENSMUSG00000026088	MIT, microtubule interacting and transport, domain containing 1 [Source:MGI Symbol;Acc:MGI:1916278]	189	270	119	25	588	256	363	151	190	214.391	0.311514	1.04272	0.29875	0.765131	1	no	214.391	0.657471	1.04231	0.630781	0.528184	1	no	214.391	-0.345956	1.04247	-0.331862	0.739994	1	no
Mrpl30	1	37890477	ENSMUSG00000026087	mitochondrial ribosomal protein L30 [Source:MGI Symbol;Acc:MGI:1333820]	156	167	92	244	99	161	559	100	206	166.922	-0.426462	0.82852	-0.514727	0.606743	1	no	166.922	-0.332048	0.828072	-0.40099	0.688428	1	no	166.922	-0.0944137	0.829315	-0.113845	0.90936	1	no
Lyg2	1	37905923	ENSMUSG00000061584	lysozyme G-like 2 [Source:MGI Symbol;Acc:MGI:2685622]	0	0	0	0	0	0	0	0	0	0	NA	NA	NA	NA	NA	no	0	NA	NA	NA	NA	NA	no	0	NA	NA	NA	NA	NA	no
Gm15457	1	37933596	ENSMUSG00000087374	predicted gene 15457 [Source:MGI Symbol;Acc:MGI:3705190]	0	0	0	0	0	0	0	0	0	0	NA	NA	NA	NA	NA	no	0	NA	NA	NA	NA	NA	no	0	NA	NA	NA	NA	NA	no
Lyg1	1	37946736	ENSMUSG00000026085	lysozyme G-like 1 [Source:MGI Symbol;Acc:MGI:1916791]	0	0	0	0	0	0	0	0	0	0	NA	NA	NA	NA	NA	no	0	NA	NA	NA	NA	NA	no	0	NA	NA	NA	NA	NA	no
Gm23409	1	37973967	ENSMUSG00000089141	predicted gene, 23409 [Source:MGI Symbol;Acc:MGI:5453186]	0	0	0	0	0	0	0	0	0	0	NA	NA	NA	NA	NA	no	0	NA	NA	NA	NA	NA	no	0	NA	NA	NA	NA	NA	no
Txndc9	1	37985189	ENSMUSG00000058407	thioredoxin domain containing 9 [Source:MGI Symbol;Acc:MGI:2138153]	366	402	522	236	194	470	899	392	455	377.045	0.129752	0.634082	0.20463	0.837862	1	no	377.045	-0.594354	0.634634	-0.93653	0.349	1	no	377.045	0.724106	0.634897	1.14051	0.254074	1	no
Eif5b	1	37998010	ENSMUSG00000026083	eukaryotic translation initiation factor 5B [Source:MGI Symbol;Acc:MGI:2441772]	569	558	898	252	101	670	1376	1693	458	600.229	-0.185404	0.820338	-0.22601	0.821194	1	no	600.229	-1.36815	0.820909	-1.66662	0.0955892	0.694754	no	600.229	1.18274	0.82112	1.4404	0.149754	0.851805	no
Rev1	1	38052786	ENSMUSG00000026082	REV1, DNA directed polymerase [Source:MGI Symbol;Acc:MGI:1929074]	0	99	33	1	216	0	3	1	0	41.3327	4.30784	2.04015	2.11153	0.0347265	0.366664	no	41.3327	4.62552	2.03974	2.2677	0.0233474	0.327997	no	41.3327	-0.317686	2.02131	-0.157169	0.875112	1	no
Gm37062	1	38076295	ENSMUSG00000103804	predicted gene, 37062 [Source:MGI Symbol;Acc:MGI:5610290]	0	0	0	0	0	0	0	0	0	0	NA	NA	NA	NA	NA	no	0	NA	NA	NA	NA	NA	no	0	NA	NA	NA	NA	NA	no
Gm5099	1	38132083	ENSMUSG00000102716	predicted gene 5099 [Source:MGI Symbol;Acc:MGI:3644917]	0	0	0	0	0	0	0	0	0	0	NA	NA	NA	NA	NA	no	0	NA	NA	NA	NA	NA	no	0	NA	NA	NA	NA	NA	no
Aff3	1	38177326	ENSMUSG00000037138	AF4/FMR2 family, member 3 [Source:MGI Symbol;Acc:MGI:106927]	101	29	20	71	0	223	0	0	111	56.1405	0.32301	2.0023	0.161319	0.871842	1	no	56.1405	0.9897	2.00172	0.494425	0.621006	1	no	56.1405	-0.66669	2.00187	-0.333034	0.739108	1	no
Gm16150	1	38235420	ENSMUSG00000085391	predicted gene 16150 [Source:MGI Symbol;Acc:MGI:3801827]	0	0	0	0	0	0	0	0	0	0	NA	NA	NA	NA	NA	no	0	NA	NA	NA	NA	NA	no	0	NA	NA	NA	NA	NA	no
Gm16151	1	38307902	ENSMUSG00000085280	predicted gene 16151 [Source:MGI Symbol;Acc:MGI:3801826]	0	0	0	0	0	0	0	0	0	0	NA	NA	NA	NA	NA	no	0	NA	NA	NA	NA	NA	no	0	NA	NA	NA	NA	NA	no
Gm16152	1	38384949	ENSMUSG00000087131	predicted gene 16152 [Source:MGI Symbol;Acc:MGI:3802058]	0	0	0	0	0	0	0	0	0	0	NA	NA	NA	NA	NA	no	0	NA	NA	NA	NA	NA	no	0	NA	NA	NA	NA	NA	no
Gm34727	1	38487519	ENSMUSG00000102984	predicted gene, 34727 [Source:MGI Symbol;Acc:MGI:5593886]	0	0	0	0	0	0	0	0	0	0	NA	NA	NA	NA	NA	no	0	NA	NA	NA	NA	NA	no	0	NA	NA	NA	NA	NA	no
Gm38135	1	38722620	ENSMUSG00000102541	predicted gene, 38135 [Source:MGI Symbol;Acc:MGI:5611363]	0	0	0	0	0	0	0	0	0	0	NA	NA	NA	NA	NA	no	0	NA	NA	NA	NA	NA	no	0	NA	NA	NA	NA	NA	no
2610300A13Rik	1	38767184	ENSMUSG00000103531	RIKEN cDNA 2610300A13 gene [Source:MGI Symbol;Acc:MGI:1917693]	0	0	0	0	0	0	0	0	0	0	NA	NA	NA	NA	NA	no	0	NA	NA	NA	NA	NA	no	0	NA	NA	NA	NA	NA	no
Lonrf2	1	38793645	ENSMUSG00000048814	LON peptidase N-terminal domain and ring finger 2 [Source:MGI Symbol;Acc:MGI:1920209]	0	0	0	0	0	0	0	0	0	0	NA	NA	NA	NA	NA	no	0	NA	NA	NA	NA	NA	no	0	NA	NA	NA	NA	NA	no
Chst10	1	38863867	ENSMUSG00000026080	carbohydrate sulfotransferase 10 [Source:MGI Symbol;Acc:MGI:2138283]	17	35	18	52	0	85	199	261	0	54.7858	-1.65105	1.71725	-0.961452	0.336325	0.947459	no	54.7858	-1.09416	1.7157	-0.637732	0.523648	1	no	54.7858	-0.556898	1.71872	-0.32402	0.745923	1	no
Gm37707	1	38884754	ENSMUSG00000103647	predicted gene, 37707 [Source:MGI Symbol;Acc:MGI:5610935]	0	0	0	0	0	0	0	0	0	0	NA	NA	NA	NA	NA	no	0	NA	NA	NA	NA	NA	no	0	NA	NA	NA	NA	NA	no
Gm6621	1	38907945	ENSMUSG00000102447	predicted gene 6621 [Source:MGI Symbol;Acc:MGI:3647848]	1	0	0	0	0	0	0	0	0	0.0938667	0.863238	2.40591	0.358799	0.719746	NA	no	0.0938667	0	2.40591	0	1	NA	no	0.0938667	0.659364	2.40591	0.27406	0.784039	NA	no
Nms	1	38939149	ENSMUSG00000067604	neuromedin S [Source:MGI Symbol;Acc:MGI:3583618]	0	0	0	0	0	0	0	0	0	0	NA	NA	NA	NA	NA	no	0	NA	NA	NA	NA	NA	no	0	NA	NA	NA	NA	NA	no
Pdcl3	1	38985608	ENSMUSG00000026078	phosducin-like 3 [Source:MGI Symbol;Acc:MGI:1916083]	0	0	38	36	0	11	0	0	23	11.6652	0.488718	2.35864	0.207204	0.835851	1	no	11.6652	0.62941	2.35837	0.266883	0.789559	1	no	11.6652	-0.140693	2.35838	-0.0596565	0.952429	1	no
Gm37309	1	38992678	ENSMUSG00000103046	predicted gene, 37309 [Source:MGI Symbol;Acc:MGI:5610537]	0	0	0	0	0	0	0	0	0	0	NA	NA	NA	NA	NA	no	0	NA	NA	NA	NA	NA	no	0	NA	NA	NA	NA	NA	no
Gm37821	1	39048648	ENSMUSG00000104188	predicted gene, 37821 [Source:MGI Symbol;Acc:MGI:5611049]	0	0	0	0	0	0	0	0	0	0	NA	NA	NA	NA	NA	no	0	NA	NA	NA	NA	NA	no	0	NA	NA	NA	NA	NA	no
Gm37091	1	39081252	ENSMUSG00000103182	predicted gene, 37091 [Source:MGI Symbol;Acc:MGI:5610319]	0	0	0	0	0	0	0	0	0	0	NA	NA	NA	NA	NA	no	0	NA	NA	NA	NA	NA	no	0	NA	NA	NA	NA	NA	no
Mir6349	1	39186896	ENSMUSG00000098833	microRNA 6349 [Source:MGI Symbol;Acc:MGI:5530940]	0	0	0	0	0	0	0	0	0	0	NA	NA	NA	NA	NA	no	0	NA	NA	NA	NA	NA	no	0	NA	NA	NA	NA	NA	no
Npas2	1	39193731	ENSMUSG00000026077	neuronal PAS domain protein 2 [Source:MGI Symbol;Acc:MGI:109232]	0	0	0	0	0	0	0	0	0	0	NA	NA	NA	NA	NA	no	0	NA	NA	NA	NA	NA	no	0	NA	NA	NA	NA	NA	no
Gm20428	1	39276283	ENSMUSG00000092553	predicted gene 20428 [Source:MGI Symbol;Acc:MGI:5141893]	0	0	0	0	0	0	0	0	0	0	NA	NA	NA	NA	NA	no	0	NA	NA	NA	NA	NA	no	0	NA	NA	NA	NA	NA	no
Gm3617	1	39314899	ENSMUSG00000092563	predicted gene 3617 [Source:MGI Symbol;Acc:MGI:3781793]	1	2	2	1	1	0	0	1	2	1.10903	0.834314	2.09718	0.397827	0.690758	NA	no	1.10903	-0.283041	2.12587	-0.133141	0.894082	NA	no	1.10903	1.11735	2.11774	0.527617	0.597765	NA	no
Rpl31	1	39367842	ENSMUSG00000073702	ribosomal protein L31 [Source:MGI Symbol;Acc:MGI:2149632]	2095	2259	3331	3303	3129	2561	7106	4887	1464	2812.6	-0.146397	0.655479	-0.223343	0.823269	1	no	2812.6	-0.0826022	0.65545	-0.126024	0.899713	1	no	2812.6	-0.0637943	0.655519	-0.0973189	0.922473	1	no
Tbc1d8	1	39371492	ENSMUSG00000003134	TBC1 domain family, member 8 [Source:MGI Symbol;Acc:MGI:1927225]	0	0	0	0	0	0	0	1	0	0.0754234	-0.270919	2.40591	-0.112606	0.910343	NA	no	0.0754234	-0.363204	2.40591	-0.150963	0.880005	NA	no	0.0754234	0	2.40591	0	1	NA	no
Gm37265	1	39419048	ENSMUSG00000102607	predicted gene, 37265 [Source:MGI Symbol;Acc:MGI:5610493]	0	0	0	0	0	0	0	0	0	0	NA	NA	NA	NA	NA	no	0	NA	NA	NA	NA	NA	no	0	NA	NA	NA	NA	NA	no
Gm24826	1	39519533	ENSMUSG00000065629	predicted gene, 24826 [Source:MGI Symbol;Acc:MGI:5454603]	0	0	0	0	0	0	0	0	0	0	NA	NA	NA	NA	NA	no	0	NA	NA	NA	NA	NA	no	0	NA	NA	NA	NA	NA	no
Gm24826	1	39519533	ENSMUSG00000104827	predicted gene, 24826 [Source:MGI Symbol;Acc:MGI:5454603]	0	0	0	0	0	0	0	0	0	0	NA	NA	NA	NA	NA	no	0	NA	NA	NA	NA	NA	no	0	NA	NA	NA	NA	NA	no
Cnot11	1	39534992	ENSMUSG00000003135	CCR4-NOT transcription complex, subunit 11 [Source:MGI Symbol;Acc:MGI:106580]	31	59	38	116	35	92	100	163	54	65.0916	-0.644742	0.836168	-0.771067	0.440667	0.984417	no	65.0916	0.0170494	0.832585	0.0204777	0.983662	1	no	65.0916	-0.661792	0.837029	-0.790644	0.429152	1	no
Gm15832	1	39547570	ENSMUSG00000085894	predicted gene 15832 [Source:MGI Symbol;Acc:MGI:3834078]	0	0	0	0	0	57	0	0	0	5.2746	0	2.40591	0	NA	NA	no	5.2746	5.18516	2.38583	2.17331	NA	NA	no	5.2746	-5.05109	2.38583	-2.11712	NA	NA	no
Snord89	1	39548745	ENSMUSG00000077704	small nucleolar RNA, C/D box 89 [Source:MGI Symbol;Acc:MGI:3819562]	0	0	0	0	0	0	0	0	0	0	NA	NA	NA	NA	NA	no	0	NA	NA	NA	NA	NA	no	0	NA	NA	NA	NA	NA	no
Rnf149	1	39551296	ENSMUSG00000048234	ring finger protein 149 [Source:MGI Symbol;Acc:MGI:2677438]	1	0	0	0	17	1	387	0	1	27.3238	-5.43377	2.16943	-2.5047	NA	NA	no	27.3238	-2.94282	2.13579	-1.37786	NA	NA	no	27.3238	-2.49095	2.17504	-1.14524	NA	NA	no
Gm23722	1	39573746	ENSMUSG00000064936	predicted gene, 23722 [Source:MGI Symbol;Acc:MGI:5453499]	0	0	0	0	0	0	0	0	0	0	NA	NA	NA	NA	NA	no	0	NA	NA	NA	NA	NA	no	0	NA	NA	NA	NA	NA	no
Gm5100	1	39597417	ENSMUSG00000102471	predicted gene 5100 [Source:MGI Symbol;Acc:MGI:3644919]	5	7	5	7	9	1	4	3	3	4.65602	1.20743	1.36744	0.882987	0.377243	NA	no	4.65602	1.0676	1.3668	0.781093	0.434748	NA	no	4.65602	0.139839	1.34675	0.103834	0.917301	NA	no
Creg2	1	39618406	ENSMUSG00000050967	cellular repressor of E1A-stimulated genes 2 [Source:MGI Symbol;Acc:MGI:1928333]	0	0	0	0	0	0	0	0	0	0	NA	NA	NA	NA	NA	no	0	NA	NA	NA	NA	NA	no	0	NA	NA	NA	NA	NA	no
D930019O06Rik	1	39650176	ENSMUSG00000097083	RIKEN cDNA D930019O06 [Source:MGI Symbol;Acc:MGI:3043219]	0	0	0	0	0	0	0	0	0	0	NA	NA	NA	NA	NA	no	0	NA	NA	NA	NA	NA	no	0	NA	NA	NA	NA	NA	no
Rfx8	1	39665301	ENSMUSG00000057173	regulatory factor X 8 [Source:MGI Symbol;Acc:MGI:3588206]	0	0	0	0	0	0	0	0	0	0	NA	NA	NA	NA	NA	no	0	NA	NA	NA	NA	NA	no	0	NA	NA	NA	NA	NA	no
Gm3646	1	39804148	ENSMUSG00000091937	predicted gene 3646 [Source:MGI Symbol;Acc:MGI:3781822]	0	0	0	0	0	0	0	0	0	0	NA	NA	NA	NA	NA	no	0	NA	NA	NA	NA	NA	no	0	NA	NA	NA	NA	NA	no
1700066B17Rik	1	39839175	ENSMUSG00000101634	RIKEN cDNA 1700066B17 gene [Source:MGI Symbol;Acc:MGI:1920676]	0	0	0	0	0	0	0	0	0	0	NA	NA	NA	NA	NA	no	0	NA	NA	NA	NA	NA	no	0	NA	NA	NA	NA	NA	no
Map4k4	1	39900913	ENSMUSG00000026074	mitogen-activated protein kinase kinase kinase kinase 4 [Source:MGI Symbol;Acc:MGI:1349394]	183	442	220	459	301	475	429	541	507	354.223	-0.227879	0.728137	-0.312962	0.75431	1	no	354.223	0.0359503	0.72776	0.0493986	0.960602	1	no	354.223	-0.263829	0.728325	-0.362241	0.717172	1	no
4930456G14Rik	1	40049039	ENSMUSG00000102985	RIKEN cDNA 4930456G14 gene [Source:MGI Symbol;Acc:MGI:1921928]	0	0	0	0	0	0	0	0	0	0	NA	NA	NA	NA	NA	no	0	NA	NA	NA	NA	NA	no	0	NA	NA	NA	NA	NA	no
Il1r2	1	40074079	ENSMUSG00000026073	interleukin 1 receptor, type II [Source:MGI Symbol;Acc:MGI:96546]	128	98	58	206	24	542	93	0	34	117.38	1.57663	1.40567	1.12163	0.262021	0.890756	no	117.38	2.68355	1.4046	1.91054	0.0560631	0.530117	no	117.38	-1.10692	1.40257	-0.78921	0.42999	1	no
Gm16894	1	40076228	ENSMUSG00000097899	predicted gene, 16894 [Source:MGI Symbol;Acc:MGI:4439818]	0	0	0	0	0	0	46	0	0	2.99635	-3.71513	2.38618	-1.55694	NA	NA	no	2.99635	-3.80741	2.38618	-1.59561	NA	NA	no	2.99635	0	2.40591	0	NA	NA	no
Gm37347	1	40088511	ENSMUSG00000102975	predicted gene, 37347 [Source:MGI Symbol;Acc:MGI:5610575]	0	0	0	0	0	0	0	0	0	0	NA	NA	NA	NA	NA	no	0	NA	NA	NA	NA	NA	no	0	NA	NA	NA	NA	NA	no
Il1r1	1	40225080	ENSMUSG00000026072	interleukin 1 receptor, type I [Source:MGI Symbol;Acc:MGI:96545]	0	0	0	0	0	0	0	0	0	0	NA	NA	NA	NA	NA	no	0	NA	NA	NA	NA	NA	no	0	NA	NA	NA	NA	NA	no
Gm38070	1	40238020	ENSMUSG00000103560	predicted gene, 38070 [Source:MGI Symbol;Acc:MGI:5611298]	0	0	0	0	0	0	0	0	0	0	NA	NA	NA	NA	NA	no	0	NA	NA	NA	NA	NA	no	0	NA	NA	NA	NA	NA	no
Il1rl2	1	40324610	ENSMUSG00000070942	interleukin 1 receptor-like 2 [Source:MGI Symbol;Acc:MGI:1913107]	0	0	0	0	0	0	0	0	0	0	NA	NA	NA	NA	NA	no	0	NA	NA	NA	NA	NA	no	0	NA	NA	NA	NA	NA	no
Gm17970	1	40353852	ENSMUSG00000103230	predicted gene, 17970 [Source:MGI Symbol;Acc:MGI:5010155]	0	1	0	0	0	0	0	0	0	0.142558	0.863238	2.40591	0.358799	0.719746	NA	no	0.142558	0	2.40591	0	1	NA	no	0.142558	0.659364	2.40591	0.27406	0.784039	NA	no
Il1rl1	1	40429570	ENSMUSG00000026069	interleukin 1 receptor-like 1 [Source:MGI Symbol;Acc:MGI:98427]	68	21	0	0	1	123	0	0	37	24.8348	0.856743	2.23319	0.383642	0.701244	1	no	24.8348	1.06869	2.23289	0.478612	0.632215	1	no	24.8348	-0.211947	2.23254	-0.0949356	0.924366	1	no
Il18r1	1	40465552	ENSMUSG00000026070	interleukin 18 receptor 1 [Source:MGI Symbol;Acc:MGI:105383]	268	0	0	1	226	170	310	0	94	95.4902	-0.201943	2.08019	-0.097079	0.922664	1	no	95.4902	0.309937	2.07994	0.149013	0.881544	1	no	95.4902	-0.51188	2.08019	-0.246073	0.805626	1	no
Il18rap	1	40515362	ENSMUSG00000026068	interleukin 18 receptor accessory protein [Source:MGI Symbol;Acc:MGI:1338888]	0	0	0	0	0	0	288	0	8	19.6179	-5.89934	2.38446	-2.47408	NA	NA	no	19.6179	-5.93608	2.38446	-2.48949	NA	NA	no	19.6179	0	2.40591	0	NA	NA	no
Gm35801	1	40572188	ENSMUSG00000104441	predicted gene, 35801 [Source:MGI Symbol;Acc:MGI:5594960]	0	0	0	0	0	0	0	0	0	0	NA	NA	NA	NA	NA	no	0	NA	NA	NA	NA	NA	no	0	NA	NA	NA	NA	NA	no
Slc9a4	1	40580081	ENSMUSG00000026065	solute carrier family 9 (sodium/hydrogen exchanger), member 4 [Source:MGI Symbol;Acc:MGI:105074]	0	0	0	0	0	0	0	0	0	0	NA	NA	NA	NA	NA	no	0	NA	NA	NA	NA	NA	no	0	NA	NA	NA	NA	NA	no
Gm37435	1	40582895	ENSMUSG00000102676	predicted gene, 37435 [Source:MGI Symbol;Acc:MGI:5610663]	0	0	0	0	0	0	0	0	0	0	NA	NA	NA	NA	NA	no	0	NA	NA	NA	NA	NA	no	0	NA	NA	NA	NA	NA	no
Slc9a2	1	40680574	ENSMUSG00000026062	solute carrier family 9 (sodium/hydrogen exchanger), member 2 [Source:MGI Symbol;Acc:MGI:105075]	0	0	0	0	0	0	0	0	0	0	NA	NA	NA	NA	NA	no	0	NA	NA	NA	NA	NA	no	0	NA	NA	NA	NA	NA	no
Gm37623	1	40691442	ENSMUSG00000103679	predicted gene, 37623 [Source:MGI Symbol;Acc:MGI:5610851]	0	0	0	0	0	0	0	0	0	0	NA	NA	NA	NA	NA	no	0	NA	NA	NA	NA	NA	no	0	NA	NA	NA	NA	NA	no
Gm37915	1	40771385	ENSMUSG00000103270	predicted gene, 37915 [Source:MGI Symbol;Acc:MGI:5611143]	0	0	0	0	0	0	0	0	0	0	NA	NA	NA	NA	NA	no	0	NA	NA	NA	NA	NA	no	0	NA	NA	NA	NA	NA	no
Mfsd9	1	40772038	ENSMUSG00000041945	major facilitator superfamily domain containing 9 [Source:MGI Symbol;Acc:MGI:2443548]	0	0	0	0	0	0	0	0	0	0	NA	NA	NA	NA	NA	no	0	NA	NA	NA	NA	NA	no	0	NA	NA	NA	NA	NA	no
Tmem182	1	40805601	ENSMUSG00000079588	transmembrane protein 182 [Source:MGI Symbol;Acc:MGI:1923725]	0	0	0	0	0	0	0	0	0	0	NA	NA	NA	NA	NA	no	0	NA	NA	NA	NA	NA	no	0	NA	NA	NA	NA	NA	no
Gm5973	1	40863737	ENSMUSG00000094136	predicted gene 5973 [Source:MGI Symbol;Acc:MGI:3646541]	0	0	0	0	0	0	0	0	0	0	NA	NA	NA	NA	NA	no	0	NA	NA	NA	NA	NA	no	0	NA	NA	NA	NA	NA	no
4930448I06Rik	1	41167587	ENSMUSG00000104072	RIKEN cDNA 4930448I06 gene [Source:MGI Symbol;Acc:MGI:1922147]	0	0	0	0	0	0	0	0	0	0	NA	NA	NA	NA	NA	no	0	NA	NA	NA	NA	NA	no	0	NA	NA	NA	NA	NA	no
Gm28634	1	41526931	ENSMUSG00000100185	predicted gene 28634 [Source:MGI Symbol;Acc:MGI:5579340]	0	0	0	0	0	0	0	0	0	0	NA	NA	NA	NA	NA	no	0	NA	NA	NA	NA	NA	no	0	NA	NA	NA	NA	NA	no
Gm29260	1	41781808	ENSMUSG00000100832	predicted gene 29260 [Source:MGI Symbol;Acc:MGI:5579966]	0	0	0	0	0	0	0	0	0	0	NA	NA	NA	NA	NA	no	0	NA	NA	NA	NA	NA	no	0	NA	NA	NA	NA	NA	no
Gm5267	1	42103289	ENSMUSG00000100178	predicted gene 5267 [Source:MGI Symbol;Acc:MGI:3643178]	0	0	0	0	0	0	0	0	0	0	NA	NA	NA	NA	NA	no	0	NA	NA	NA	NA	NA	no	0	NA	NA	NA	NA	NA	no
Gm8176	1	42179290	ENSMUSG00000101877	predicted gene 8176 [Source:MGI Symbol;Acc:MGI:3646477]	1	0	0	0	0	0	0	0	0	0.0938667	0.863238	2.40591	0.358799	0.719746	NA	no	0.0938667	0	2.40591	0	1	NA	no	0.0938667	0.659364	2.40591	0.27406	0.784039	NA	no
Gm9915	1	42229726	ENSMUSG00000053640	predicted gene 9915 [Source:MGI Symbol;Acc:MGI:3641924]	0	0	0	0	0	0	0	0	0	0	NA	NA	NA	NA	NA	no	0	NA	NA	NA	NA	NA	no	0	NA	NA	NA	NA	NA	no
Gm29664	1	42238233	ENSMUSG00000101919	predicted gene 29664 [Source:MGI Symbol;Acc:MGI:5580370]	0	0	0	0	0	0	0	0	0	0	NA	NA	NA	NA	NA	no	0	NA	NA	NA	NA	NA	no	0	NA	NA	NA	NA	NA	no
Gm28175	1	42261855	ENSMUSG00000101299	predicted gene 28175 [Source:MGI Symbol;Acc:MGI:5578881]	0	0	0	0	0	0	0	0	0	0	NA	NA	NA	NA	NA	no	0	NA	NA	NA	NA	NA	no	0	NA	NA	NA	NA	NA	no
Gm28140	1	42324590	ENSMUSG00000100180	predicted gene 28140 [Source:MGI Symbol;Acc:MGI:5578846]	0	0	0	0	0	0	0	0	0	0	NA	NA	NA	NA	NA	no	0	NA	NA	NA	NA	NA	no	0	NA	NA	NA	NA	NA	no
Gm37047	1	42491813	ENSMUSG00000103106	predicted gene, 37047 [Source:MGI Symbol;Acc:MGI:5610275]	0	0	0	0	0	0	0	0	0	0	NA	NA	NA	NA	NA	no	0	NA	NA	NA	NA	NA	no	0	NA	NA	NA	NA	NA	no
Pantr1	1	42590782	ENSMUSG00000060424	POU domain, class 3, transcription factor 3 adjacent noncoding transcript 1 [Source:MGI Symbol;Acc:MGI:1913547]	0	0	0	0	0	0	0	0	0	0	NA	NA	NA	NA	NA	no	0	NA	NA	NA	NA	NA	no	0	NA	NA	NA	NA	NA	no
4930420N18Rik	1	42651726	ENSMUSG00000104199	RIKEN cDNA 4930420N18 gene [Source:MGI Symbol;Acc:MGI:1921202]	0	0	0	0	0	0	0	0	0	0	NA	NA	NA	NA	NA	no	0	NA	NA	NA	NA	NA	no	0	NA	NA	NA	NA	NA	no
Gm20646	1	42694925	ENSMUSG00000093436	predicted gene 20646 [Source:MGI Symbol;Acc:MGI:5313093]	0	0	0	0	0	0	0	0	0	0	NA	NA	NA	NA	NA	no	0	NA	NA	NA	NA	NA	no	0	NA	NA	NA	NA	NA	no
Pou3f3	1	42695768	ENSMUSG00000045515	POU domain, class 3, transcription factor 3 [Source:MGI Symbol;Acc:MGI:102564]	0	0	0	0	0	0	0	0	0	0	NA	NA	NA	NA	NA	no	0	NA	NA	NA	NA	NA	no	0	NA	NA	NA	NA	NA	no
Pantr2	1	42707061	ENSMUSG00000097063	POU domain, class 3, transcription factor 3 adjacent noncoding transcript 2 [Source:MGI Symbol;Acc:MGI:1913870]	0	0	0	0	0	0	0	0	0	0	NA	NA	NA	NA	NA	no	0	NA	NA	NA	NA	NA	no	0	NA	NA	NA	NA	NA	no
Dalir	1	42750712	ENSMUSG00000099784	DNMT1 associated long intergenic non-coding RNA [Source:MGI Symbol;Acc:MGI:5579231]	0	0	0	0	0	0	0	0	0	0	NA	NA	NA	NA	NA	no	0	NA	NA	NA	NA	NA	no	0	NA	NA	NA	NA	NA	no
Mrps9	1	42851233	ENSMUSG00000060679	mitochondrial ribosomal protein S9 [Source:MGI Symbol;Acc:MGI:1916777]	395	199	133	242	266	149	1	1	68	156.457	3.13091	1.37928	2.26997	0.0232095	0.294227	no	156.457	2.92331	1.3793	2.11942	0.0340547	0.403387	no	156.457	0.207604	1.37508	0.150976	0.879994	1	no
Gm23126	1	42866685	ENSMUSG00000077448	predicted gene, 23126 [Source:MGI Symbol;Acc:MGI:5452903]	0	0	0	0	0	0	0	0	0	0	NA	NA	NA	NA	NA	no	0	NA	NA	NA	NA	NA	no	0	NA	NA	NA	NA	NA	no
Gpr45	1	42952872	ENSMUSG00000041907	G protein-coupled receptor 45 [Source:MGI Symbol;Acc:MGI:2135882]	0	0	0	39	0	0	0	0	0	4.25415	0	2.40591	0	NA	NA	no	4.25415	4.38323	2.38605	1.83703	NA	NA	no	4.25415	-4.08707	2.38605	-1.7129	NA	NA	no
Gm24001	1	43036845	ENSMUSG00000089088	predicted gene, 24001 [Source:MGI Symbol;Acc:MGI:5453778]	0	0	0	0	0	0	0	0	0	0	NA	NA	NA	NA	NA	no	0	NA	NA	NA	NA	NA	no	0	NA	NA	NA	NA	NA	no
Tgfbrap1	1	43047200	ENSMUSG00000070939	transforming growth factor, beta receptor associated protein 1 [Source:MGI Symbol;Acc:MGI:2447427]	371	75	60	1	328	177	0	10	3	104.944	4.92643	1.52859	3.22287	0.00126913	0.0582365	no	104.944	4.9111	1.52848	3.21307	0.00131323	0.0639899	no	104.944	0.0153329	1.50633	0.010179	0.991879	1	no
Gm28782	1	43056267	ENSMUSG00000100269	predicted gene 28782 [Source:MGI Symbol;Acc:MGI:5579488]	0	0	0	0	0	0	0	0	0	0	NA	NA	NA	NA	NA	no	0	NA	NA	NA	NA	NA	no	0	NA	NA	NA	NA	NA	no
8430432A02Rik	1	43092588	ENSMUSG00000041878	RIKEN cDNA 8430432A02 gene [Source:MGI Symbol;Acc:MGI:1918774]	0	0	0	0	0	0	0	0	0	0	NA	NA	NA	NA	NA	no	0	NA	NA	NA	NA	NA	no	0	NA	NA	NA	NA	NA	no
AI597479	1	43098710	ENSMUSG00000010290	expressed sequence AI597479 [Source:MGI Symbol;Acc:MGI:2138299]	6	0	0	0	1	63	0	0	0	6.50018	1.98141	2.38665	0.830207	NA	NA	no	6.50018	4.35086	2.38052	1.82769	NA	NA	no	6.50018	-2.36945	2.36762	-1.00077	NA	NA	no
Fhl2	1	43123074	ENSMUSG00000008136	four and a half LIM domains 2 [Source:MGI Symbol;Acc:MGI:1338762]	0	0	0	0	0	0	0	0	0	0	NA	NA	NA	NA	NA	no	0	NA	NA	NA	NA	NA	no	0	NA	NA	NA	NA	NA	no
Gm8210	1	43189156	ENSMUSG00000094497	predicted pseudogene 8210 [Source:MGI Symbol;Acc:MGI:3643593]	0	0	0	0	0	0	2	1	0	0.205699	-1.08142	2.40174	-0.450268	0.652517	NA	no	0.205699	-1.17371	2.40174	-0.488692	0.62506	NA	no	0.205699	0	2.40591	0	1	NA	no
Gm29040	1	43250156	ENSMUSG00000099576	predicted gene 29040 [Source:MGI Symbol;Acc:MGI:5579746]	0	0	0	0	0	0	0	0	0	0	NA	NA	NA	NA	NA	no	0	NA	NA	NA	NA	NA	no	0	NA	NA	NA	NA	NA	no
Gm29610	1	43270683	ENSMUSG00000099694	predicted gene 29610 [Source:MGI Symbol;Acc:MGI:5580316]	0	0	0	0	0	0	0	0	0	0	NA	NA	NA	NA	NA	no	0	NA	NA	NA	NA	NA	no	0	NA	NA	NA	NA	NA	no
Gm29041	1	43409584	ENSMUSG00000101923	predicted gene 29041 [Source:MGI Symbol;Acc:MGI:5579747]	0	0	0	0	0	0	0	0	0	0	NA	NA	NA	NA	NA	no	0	NA	NA	NA	NA	NA	no	0	NA	NA	NA	NA	NA	no
Nck2	1	43444579	ENSMUSG00000066877	non-catalytic region of tyrosine kinase adaptor protein 2 [Source:MGI Symbol;Acc:MGI:1306821]	58	1	26	65	0	0	155	132	35	39.3939	-1.2597	1.77472	-0.7098	0.477828	0.990999	no	39.3939	-1.48059	1.77484	-0.834207	0.404164	1	no	39.3939	0.220892	1.77747	0.124273	0.901099	1	no
Gm37536	1	43488447	ENSMUSG00000103422	predicted gene, 37536 [Source:MGI Symbol;Acc:MGI:5610764]	0	0	0	0	0	0	0	0	0	0	NA	NA	NA	NA	NA	no	0	NA	NA	NA	NA	NA	no	0	NA	NA	NA	NA	NA	no
Gm38228	1	43560273	ENSMUSG00000103945	predicted gene, 38228 [Source:MGI Symbol;Acc:MGI:5611456]	0	0	0	0	0	0	0	0	0	0	NA	NA	NA	NA	NA	no	0	NA	NA	NA	NA	NA	no	0	NA	NA	NA	NA	NA	no
1500015O10Rik	1	43730602	ENSMUSG00000026051	RIKEN cDNA 1500015O10 gene [Source:MGI Symbol;Acc:MGI:1926146]	0	0	0	0	0	0	0	0	0	0	NA	NA	NA	NA	NA	no	0	NA	NA	NA	NA	NA	no	0	NA	NA	NA	NA	NA	no
Gm29155	1	43741961	ENSMUSG00000100764	predicted gene 29155 [Source:MGI Symbol;Acc:MGI:5579861]	0	0	0	0	0	0	0	0	0	0	NA	NA	NA	NA	NA	no	0	NA	NA	NA	NA	NA	no	0	NA	NA	NA	NA	NA	no
Gm29157	1	43742915	ENSMUSG00000100635	predicted gene 29157 [Source:MGI Symbol;Acc:MGI:5579863]	0	0	0	0	0	0	0	0	0	0	NA	NA	NA	NA	NA	no	0	NA	NA	NA	NA	NA	no	0	NA	NA	NA	NA	NA	no
Gm29156	1	43745784	ENSMUSG00000100480	predicted gene 29156 [Source:MGI Symbol;Acc:MGI:5579862]	0	0	0	0	0	0	0	0	0	0	NA	NA	NA	NA	NA	no	0	NA	NA	NA	NA	NA	no	0	NA	NA	NA	NA	NA	no
Uxs1	1	43746966	ENSMUSG00000057363	UDP-glucuronate decarboxylase 1 [Source:MGI Symbol;Acc:MGI:1915133]	63	1	23	180	0	266	2	118	1	62.0173	-0.066774	1.78766	-0.0373528	0.970204	1	no	62.0173	1.92683	1.78498	1.07946	0.280381	1	no	62.0173	-1.9936	1.78609	-1.11618	0.264344	1	no
Gm16103	1	43785910	ENSMUSG00000090243	predicted gene 16103 [Source:MGI Symbol;Acc:MGI:3802086]	0	0	0	0	0	0	0	0	0	0	NA	NA	NA	NA	NA	no	0	NA	NA	NA	NA	NA	no	0	NA	NA	NA	NA	NA	no
Gm19587	1	43888051	ENSMUSG00000100701	predicted gene, 19587 [Source:MGI Symbol;Acc:MGI:5011772]	0	0	0	0	0	0	0	3	0	0.22627	-1.15599	2.40095	-0.48147	0.630182	NA	no	0.22627	-1.24827	2.40095	-0.519907	0.603128	NA	no	0.22627	0	2.40591	0	1	NA	no
Gm8241	1	43898294	ENSMUSG00000101395	predicted gene 8241 [Source:MGI Symbol;Acc:MGI:3647219]	0	0	0	0	0	0	0	0	0	0	NA	NA	NA	NA	NA	no	0	NA	NA	NA	NA	NA	no	0	NA	NA	NA	NA	NA	no
Gm26352	1	43902928	ENSMUSG00000088848	predicted gene, 26352 [Source:MGI Symbol;Acc:MGI:5456129]	0	0	0	0	0	0	0	0	0	0	NA	NA	NA	NA	NA	no	0	NA	NA	NA	NA	NA	no	0	NA	NA	NA	NA	NA	no
Gm24180	1	43918777	ENSMUSG00000095757	predicted gene, 24180 [Source:MGI Symbol;Acc:MGI:5453957]	0	0	0	0	0	0	0	0	0	0	NA	NA	NA	NA	NA	no	0	NA	NA	NA	NA	NA	no	0	NA	NA	NA	NA	NA	no
Tpp2	1	43933647	ENSMUSG00000041763	tripeptidyl peptidase II [Source:MGI Symbol;Acc:MGI:102724]	359	2	131	1	177	82	28	43	247	106.872	0.556712	1.54288	0.360826	0.71823	1	no	106.872	-0.214462	1.54341	-0.138954	0.889487	1	no	106.872	0.771173	1.54336	0.499672	0.617306	1	no
Mettl21c	1	44009408	ENSMUSG00000047343	methyltransferase like 21C [Source:MGI Symbol;Acc:MGI:3611450]	0	0	0	0	0	0	0	0	0	0	NA	NA	NA	NA	NA	no	0	NA	NA	NA	NA	NA	no	0	NA	NA	NA	NA	NA	no
Gm15838	1	44018470	ENSMUSG00000090106	predicted gene 15838 [Source:MGI Symbol;Acc:MGI:3801943]	0	0	0	0	0	0	0	0	0	0	NA	NA	NA	NA	NA	no	0	NA	NA	NA	NA	NA	no	0	NA	NA	NA	NA	NA	no
Gm8251	1	44055952	ENSMUSG00000091844	predicted gene 8251 [Source:MGI Symbol;Acc:MGI:3647616]	0	0	0	0	0	0	0	0	0	0	NA	NA	NA	NA	NA	no	0	NA	NA	NA	NA	NA	no	0	NA	NA	NA	NA	NA	no
Tex30	1	44086613	ENSMUSG00000026049	testis expressed 30 [Source:MGI Symbol;Acc:MGI:1922873]	94	399	1	1	1	111	168	0	2	87.4615	2.09628	1.91177	1.09651	0.272855	0.896907	no	87.4615	-0.0709482	1.91321	-0.0370832	0.970419	1	no	87.4615	2.16723	1.91223	1.13335	0.257066	1	no
Gm29247	1	44091463	ENSMUSG00000101104	predicted gene 29247 [Source:MGI Symbol;Acc:MGI:5579953]	0	0	0	0	0	0	0	0	0	0	NA	NA	NA	NA	NA	no	0	NA	NA	NA	NA	NA	no	0	NA	NA	NA	NA	NA	no
Kdelc1	1	44106546	ENSMUSG00000026047	KDEL (Lys-Asp-Glu-Leu) containing 1 [Source:MGI Symbol;Acc:MGI:1919300]	1	0	0	0	0	36	0	0	0	3.42519	0.827938	2.40443	0.344338	NA	NA	no	3.42519	4.08306	2.38636	1.711	NA	NA	no	3.42519	-3.25512	2.38468	-1.36501	NA	NA	no
Bivm	1	44118957	ENSMUSG00000041684	basic, immunoglobulin-like variable motif containing [Source:MGI Symbol;Acc:MGI:2179809]	0	7	0	0	0	0	0	0	0	0.997904	2.89916	2.39188	1.21209	0.225479	NA	no	0.997904	0	2.40591	0	1	NA	no	0.997904	2.69529	2.39188	1.12685	0.259806	NA	no
Ercc5	1	44147744	ENSMUSG00000026048	excision repair cross-complementing rodent repair deficiency, complementation group 5 [Source:MGI Symbol;Acc:MGI:103582]	1	0	0	24	0	101	1	0	29	15.2339	-3.13992	2.15316	-1.45829	0.144762	0.73295	no	15.2339	1.53378	2.10753	0.727762	0.466759	1	no	15.2339	-4.6737	2.151	-2.17281	0.0297948	0.379737	no
Mettl21e	1	44204070	ENSMUSG00000046828	methyltransferase like 21E [Source:MGI Symbol;Acc:MGI:2685837]	0	0	0	0	0	0	0	0	0	0	NA	NA	NA	NA	NA	no	0	NA	NA	NA	NA	NA	no	0	NA	NA	NA	NA	NA	no
Gm15833	1	44212162	ENSMUSG00000089703	predicted gene 15833 [Source:MGI Symbol;Acc:MGI:3801794]	0	0	0	0	0	0	0	0	0	0	NA	NA	NA	NA	NA	no	0	NA	NA	NA	NA	NA	no	0	NA	NA	NA	NA	NA	no
Gm5700	1	44330048	ENSMUSG00000100966	predicted gene 5700 [Source:MGI Symbol;Acc:MGI:3649023]	0	0	0	0	0	0	0	0	0	0	NA	NA	NA	NA	NA	no	0	NA	NA	NA	NA	NA	no	0	NA	NA	NA	NA	NA	no
Gm28893	1	44392809	ENSMUSG00000100769	predicted gene 28893 [Source:MGI Symbol;Acc:MGI:5579599]	0	0	0	0	0	0	0	0	0	0	NA	NA	NA	NA	NA	no	0	NA	NA	NA	NA	NA	no	0	NA	NA	NA	NA	NA	no
Txn-ps1	1	44463923	ENSMUSG00000101567	thioredoxin, pseudogene 1 [Source:MGI Symbol;Acc:MGI:98875]	5	9	3	1	0	0	0	0	2	2.41175	2.4544	2.22047	1.10535	0.269007	NA	no	2.41175	-0.53554	2.26556	-0.236383	0.813136	NA	no	2.41175	2.98994	2.24418	1.33231	0.182759	NA	no
Gulp1	1	44551511	ENSMUSG00000056870	GULP, engulfment adaptor PTB domain containing 1 [Source:MGI Symbol;Acc:MGI:1920407]	0	0	0	0	0	0	0	0	0	0	NA	NA	NA	NA	NA	no	0	NA	NA	NA	NA	NA	no	0	NA	NA	NA	NA	NA	no
Gm37626	1	44560885	ENSMUSG00000102319	predicted gene, 37626 [Source:MGI Symbol;Acc:MGI:5610854]	0	0	0	0	0	0	0	0	0	0	NA	NA	NA	NA	NA	no	0	NA	NA	NA	NA	NA	no	0	NA	NA	NA	NA	NA	no
Gm16102	1	44644279	ENSMUSG00000089877	predicted gene 16102 [Source:MGI Symbol;Acc:MGI:3802041]	0	0	0	0	0	0	0	0	0	0	NA	NA	NA	NA	NA	no	0	NA	NA	NA	NA	NA	no	0	NA	NA	NA	NA	NA	no
4930521E06Rik	1	44739676	ENSMUSG00000101701	RIKEN cDNA 4930521E06 gene [Source:MGI Symbol;Acc:MGI:1922316]	0	0	0	0	0	0	0	0	0	0	NA	NA	NA	NA	NA	no	0	NA	NA	NA	NA	NA	no	0	NA	NA	NA	NA	NA	no
Gm38110	1	44756942	ENSMUSG00000103071	predicted gene, 38110 [Source:MGI Symbol;Acc:MGI:5611338]	0	0	0	0	0	0	0	0	0	0	NA	NA	NA	NA	NA	no	0	NA	NA	NA	NA	NA	no	0	NA	NA	NA	NA	NA	no
Gm3489	1	44839171	ENSMUSG00000100434	predicted gene 3489 [Source:MGI Symbol;Acc:MGI:3781666]	0	0	0	0	0	0	0	0	0	0	NA	NA	NA	NA	NA	no	0	NA	NA	NA	NA	NA	no	0	NA	NA	NA	NA	NA	no
Gm19480	1	44873486	ENSMUSG00000100013	predicted gene, 19480 [Source:MGI Symbol;Acc:MGI:5011665]	0	0	0	0	0	0	0	0	0	0	NA	NA	NA	NA	NA	no	0	NA	NA	NA	NA	NA	no	0	NA	NA	NA	NA	NA	no
Gm3496	1	44924149	ENSMUSG00000101251	predicted gene 3496 [Source:MGI Symbol;Acc:MGI:3781673]	0	0	0	0	0	0	0	0	0	0	NA	NA	NA	NA	NA	no	0	NA	NA	NA	NA	NA	no	0	NA	NA	NA	NA	NA	no
Gm5268	1	45178067	ENSMUSG00000101937	predicted gene 5268 [Source:MGI Symbol;Acc:MGI:3646790]	0	0	2	0	0	0	0	0	0	0.223854	1.46144	2.40516	0.607626	0.543435	NA	no	0.223854	0	2.40591	0	1	NA	no	0.223854	1.25756	2.40516	0.522861	0.601071	NA	no
Col3a1	1	45311538	ENSMUSG00000026043	collagen, type III, alpha 1 [Source:MGI Symbol;Acc:MGI:88453]	2	0	0	0	0	0	3	0	0	0.383147	0.00806019	2.39911	0.00335966	0.997319	NA	no	0.383147	-1.0933	2.40052	-0.455443	0.648791	NA	no	0.383147	1.10136	2.40458	0.458025	0.646935	NA	no
AC125167.1	1	45311673	ENSMUSG00000105211		0	0	0	0	0	0	0	0	0	0	NA	NA	NA	NA	NA	no	0	NA	NA	NA	NA	NA	no	0	NA	NA	NA	NA	NA	no
Col5a2	1	45374321	ENSMUSG00000026042	collagen, type V, alpha 2 [Source:MGI Symbol;Acc:MGI:88458]	0	0	0	0	0	0	0	0	0	0	NA	NA	NA	NA	NA	no	0	NA	NA	NA	NA	NA	no	0	NA	NA	NA	NA	NA	no
Gm38211	1	45485836	ENSMUSG00000104476	predicted gene, 38211 [Source:MGI Symbol;Acc:MGI:5611439]	0	0	0	0	0	0	0	0	0	0	NA	NA	NA	NA	NA	no	0	NA	NA	NA	NA	NA	no	0	NA	NA	NA	NA	NA	no
Gm8296	1	45513532	ENSMUSG00000100218	predicted gene 8296 [Source:MGI Symbol;Acc:MGI:3648466]	0	0	0	0	0	0	0	0	0	0	NA	NA	NA	NA	NA	no	0	NA	NA	NA	NA	NA	no	0	NA	NA	NA	NA	NA	no
Gm7063	1	45519774	ENSMUSG00000100361	predicted gene 7063 [Source:MGI Symbol;Acc:MGI:3644583]	0	0	0	0	0	0	0	0	0	0	NA	NA	NA	NA	NA	no	0	NA	NA	NA	NA	NA	no	0	NA	NA	NA	NA	NA	no
Gm8304	1	45602026	ENSMUSG00000100894	predicted gene 8304 [Source:MGI Symbol;Acc:MGI:3646945]	0	0	1	0	0	0	0	0	0	0.111927	0.863238	2.40591	0.358799	0.719746	NA	no	0.111927	0	2.40591	0	1	NA	no	0.111927	0.659364	2.40591	0.27406	0.784039	NA	no
Gm23216	1	45685456	ENSMUSG00000095121	predicted gene, 23216 [Source:MGI Symbol;Acc:MGI:5452993]	0	0	0	0	0	0	0	0	0	0	NA	NA	NA	NA	NA	no	0	NA	NA	NA	NA	NA	no	0	NA	NA	NA	NA	NA	no
Gm23974	1	45746895	ENSMUSG00000065255	predicted gene, 23974 [Source:MGI Symbol;Acc:MGI:5453751]	0	0	0	0	0	0	0	0	0	0	NA	NA	NA	NA	NA	no	0	NA	NA	NA	NA	NA	no	0	NA	NA	NA	NA	NA	no
Gm8307	1	45768337	ENSMUSG00000100843	predicted gene 8307 [Source:MGI Symbol;Acc:MGI:3646941]	0	0	0	0	0	0	0	0	0	0	NA	NA	NA	NA	NA	no	0	NA	NA	NA	NA	NA	no	0	NA	NA	NA	NA	NA	no
Gm23984	1	45772962	ENSMUSG00000087764	predicted gene, 23984 [Source:MGI Symbol;Acc:MGI:5453761]	0	0	0	0	0	0	0	0	0	0	NA	NA	NA	NA	NA	no	0	NA	NA	NA	NA	NA	no	0	NA	NA	NA	NA	NA	no
Wdr75	1	45795166	ENSMUSG00000025995	WD repeat domain 75 [Source:MGI Symbol;Acc:MGI:1920924]	76	0	246	325	0	8	239	0	48	91.5763	0.569876	2.05334	0.277536	0.781368	1	no	91.5763	0.617932	2.05325	0.300952	0.763451	1	no	91.5763	-0.0480564	2.05322	-0.0234054	0.981327	1	no
Gm28906	1	45833800	ENSMUSG00000099850	predicted gene 28906 [Source:MGI Symbol;Acc:MGI:5579612]	0	0	0	0	0	0	0	0	0	0	NA	NA	NA	NA	NA	no	0	NA	NA	NA	NA	NA	no	0	NA	NA	NA	NA	NA	no
Gm5526	1	45857332	ENSMUSG00000084817	predicted pseudogene 5526 [Source:MGI Symbol;Acc:MGI:3643066]	18	8	17	5	12	146	511	100	13	62.2969	-2.902	1.32791	-2.18539	0.0288604	0.330558	no	62.2969	-1.34963	1.31924	-1.02304	0.306291	1	no	62.2969	-1.55237	1.33048	-1.16678	0.2433	1	no
Gm5269	1	45889525	ENSMUSG00000098549	predicted gene 5269 [Source:MGI Symbol;Acc:MGI:3646793]	0	0	0	0	0	0	0	0	0	0	NA	NA	NA	NA	NA	no	0	NA	NA	NA	NA	NA	no	0	NA	NA	NA	NA	NA	no
Gm18303	1	45905623	ENSMUSG00000099381	predicted gene, 18303 [Source:MGI Symbol;Acc:MGI:5010488]	0	0	0	0	0	0	0	0	0	0	NA	NA	NA	NA	NA	no	0	NA	NA	NA	NA	NA	no	0	NA	NA	NA	NA	NA	no
Slc40a1	1	45908068	ENSMUSG00000025993	solute carrier family 40 (iron-regulated transporter), member 1 [Source:MGI Symbol;Acc:MGI:1315204]	1	0	0	1	0	0	1	0	1	0.375354	-0.270543	2.40197	-0.112634	0.910321	NA	no	0.375354	-0.362828	2.40197	-0.151054	0.879933	NA	no	0.375354	0.0922849	2.40591	0.0383576	0.969403	NA	no
Gm9496	1	45971182	ENSMUSG00000099946	predicted gene 9496 [Source:MGI Symbol;Acc:MGI:3779906]	0	0	0	0	0	0	0	0	0	0	NA	NA	NA	NA	NA	no	0	NA	NA	NA	NA	NA	no	0	NA	NA	NA	NA	NA	no
Rpl23a-ps1	1	45981548	ENSMUSG00000070896	ribosomal protein 23A, pseudogene 1 [Source:MGI Symbol;Acc:MGI:3646201]	0	0	0	0	0	0	0	0	1	0.107268	-0.270919	2.40591	-0.112606	0.910343	NA	no	0.107268	-0.363204	2.40591	-0.150963	0.880005	NA	no	0.107268	0	2.40591	0	1	NA	no
Gm3852	1	46011757	ENSMUSG00000090682	predicted gene 3852 [Source:MGI Symbol;Acc:MGI:3782024]	0	0	0	0	0	0	0	0	0	0	NA	NA	NA	NA	NA	no	0	NA	NA	NA	NA	NA	no	0	NA	NA	NA	NA	NA	no
Stk-ps2	1	46020072	ENSMUSG00000044457	serine/threonine kinase 2 [Source:MGI Symbol;Acc:MGI:3643324]	0	0	0	0	0	0	0	0	0	0	NA	NA	NA	NA	NA	no	0	NA	NA	NA	NA	NA	no	0	NA	NA	NA	NA	NA	no
Gm18849	1	46056310	ENSMUSG00000099432	predicted gene, 18849 [Source:MGI Symbol;Acc:MGI:5011034]	0	0	0	0	0	0	0	0	0	0	NA	NA	NA	NA	NA	no	0	NA	NA	NA	NA	NA	no	0	NA	NA	NA	NA	NA	no
Dnah7b	1	46066315	ENSMUSG00000041144	dynein, axonemal, heavy chain 7B [Source:MGI Symbol;Acc:MGI:2684953]	0	0	0	0	0	0	0	0	1	0.107268	-0.270919	2.40591	-0.112606	0.910343	NA	no	0.107268	-0.363204	2.40591	-0.150963	0.880005	NA	no	0.107268	0	2.40591	0	1	NA	no
n-R5s211	1	46374197	ENSMUSG00000096047	nuclear encoded rRNA 5S 211 [Source:MGI Symbol;Acc:MGI:4422076]	0	0	0	0	0	0	0	0	0	0	NA	NA	NA	NA	NA	no	0	NA	NA	NA	NA	NA	no	0	NA	NA	NA	NA	NA	no
Gm8326	1	46414502	ENSMUSG00000101262	predicted gene 8326 [Source:MGI Symbol;Acc:MGI:3644839]	3	1	1	3	3	8	12	9	15	4.99459	-2.27891	1.34212	-1.69799	0.0895093	NA	no	4.99459	-1.05289	1.27465	-0.826026	0.408789	NA	no	4.99459	-1.22601	1.36689	-0.896939	0.369751	NA	no
Dnah7c	1	46425592	ENSMUSG00000101337	dynein, axonemal, heavy chain 7C [Source:MGI Symbol;Acc:MGI:3639762]	0	0	0	0	0	0	0	0	0	0	NA	NA	NA	NA	NA	no	0	NA	NA	NA	NA	NA	no	0	NA	NA	NA	NA	NA	no
Slc39a10	1	46807544	ENSMUSG00000025986	solute carrier family 39 (zinc transporter), member 10 [Source:MGI Symbol;Acc:MGI:1914515]	2	45	92	47	0	0	0	0	0	22.0269	5.65741	2.21102	2.55873	0.0105054	0.192581	no	22.0269	4.29004	2.21252	1.93899	0.0525031	0.512932	no	22.0269	1.36736	2.1717	0.629628	0.528938	1	no
Gm28151	1	46849529	ENSMUSG00000100213	predicted gene 28151 [Source:MGI Symbol;Acc:MGI:5578857]	0	0	1	0	0	0	0	0	66	7.19164	-3.89406	2.38011	-1.63608	NA	NA	no	7.19164	-4.61867	2.38499	-1.93655	NA	NA	no	7.19164	0.724611	2.40187	0.301686	NA	NA	no
Gm37393	1	46877203	ENSMUSG00000103129	predicted gene, 37393 [Source:MGI Symbol;Acc:MGI:5610621]	0	0	0	0	0	0	0	0	0	0	NA	NA	NA	NA	NA	no	0	NA	NA	NA	NA	NA	no	0	NA	NA	NA	NA	NA	no
Gm28527	1	46896583	ENSMUSG00000100160	predicted gene 28527 [Source:MGI Symbol;Acc:MGI:5579233]	0	0	0	0	0	0	0	0	0	0	NA	NA	NA	NA	NA	no	0	NA	NA	NA	NA	NA	no	0	NA	NA	NA	NA	NA	no
Gm28825	1	47067788	ENSMUSG00000101921	predicted gene 28825 [Source:MGI Symbol;Acc:MGI:5579531]	0	0	0	0	0	0	0	0	0	0	NA	NA	NA	NA	NA	no	0	NA	NA	NA	NA	NA	no	0	NA	NA	NA	NA	NA	no
Gm28826	1	47153461	ENSMUSG00000101447	predicted gene 28826 [Source:MGI Symbol;Acc:MGI:5579532]	0	0	0	0	0	0	0	0	0	0	NA	NA	NA	NA	NA	no	0	NA	NA	NA	NA	NA	no	0	NA	NA	NA	NA	NA	no
Gm4852	1	47365644	ENSMUSG00000081185	predicted pseudogene 4852 [Source:MGI Symbol;Acc:MGI:3643039]	1	0	0	7	0	0	0	2	0	1.00828	-0.219213	2.39841	-0.0913993	0.927175	NA	no	1.00828	1.47867	2.38369	0.620328	0.535042	NA	no	1.00828	-1.69788	2.39041	-0.71029	0.477524	NA	no
Gm38090	1	47433824	ENSMUSG00000103246	predicted gene, 38090 [Source:MGI Symbol;Acc:MGI:5611318]	0	0	0	0	0	0	0	0	0	0	NA	NA	NA	NA	NA	no	0	NA	NA	NA	NA	NA	no	0	NA	NA	NA	NA	NA	no
Mir6350	1	47467021	ENSMUSG00000098876	microRNA 6350 [Source:MGI Symbol;Acc:MGI:5531340]	0	0	0	0	0	0	0	0	0	0	NA	NA	NA	NA	NA	no	0	NA	NA	NA	NA	NA	no	0	NA	NA	NA	NA	NA	no
Gm18117	1	47478868	ENSMUSG00000100530	predicted gene, 18117 [Source:MGI Symbol;Acc:MGI:5010302]	0	0	0	0	0	0	0	0	0	0	NA	NA	NA	NA	NA	no	0	NA	NA	NA	NA	NA	no	0	NA	NA	NA	NA	NA	no
Gm37196	1	47605996	ENSMUSG00000104067	predicted gene, 37196 [Source:MGI Symbol;Acc:MGI:5610424]	0	0	0	0	0	0	0	0	0	0	NA	NA	NA	NA	NA	no	0	NA	NA	NA	NA	NA	no	0	NA	NA	NA	NA	NA	no
Gm8337	1	47657693	ENSMUSG00000100033	predicted gene 8337 [Source:MGI Symbol;Acc:MGI:3644012]	1	3	1	0	1	1	2	4	6	1.90874	-0.67214	1.76643	-0.380506	0.70357	NA	no	1.90874	-1.9779	1.82828	-1.08184	0.279325	NA	no	1.90874	1.30576	1.8561	0.703493	0.481748	NA	no
Gm22419	1	47749279	ENSMUSG00000094968	predicted gene, 22419 [Source:MGI Symbol;Acc:MGI:5452196]	0	0	0	0	0	0	0	0	0	0	NA	NA	NA	NA	NA	no	0	NA	NA	NA	NA	NA	no	0	NA	NA	NA	NA	NA	no
Gm23829	1	47751299	ENSMUSG00000088017	predicted gene, 23829 [Source:MGI Symbol;Acc:MGI:5453606]	0	0	0	0	0	0	0	0	0	0	NA	NA	NA	NA	NA	no	0	NA	NA	NA	NA	NA	no	0	NA	NA	NA	NA	NA	no
Gm19206	1	47914989	ENSMUSG00000101996	predicted gene, 19206 [Source:MGI Symbol;Acc:MGI:5011391]	0	0	0	0	0	0	0	0	0	0	NA	NA	NA	NA	NA	no	0	NA	NA	NA	NA	NA	no	0	NA	NA	NA	NA	NA	no
Gm5974	1	48313866	ENSMUSG00000096973	predicted gene 5974 [Source:MGI Symbol;Acc:MGI:3646540]	0	0	0	0	0	0	0	0	0	0	NA	NA	NA	NA	NA	no	0	NA	NA	NA	NA	NA	no	0	NA	NA	NA	NA	NA	no
Gm23240	1	48462173	ENSMUSG00000064943	predicted gene, 23240 [Source:MGI Symbol;Acc:MGI:5453017]	0	0	0	0	0	0	0	0	0	0	NA	NA	NA	NA	NA	no	0	NA	NA	NA	NA	NA	no	0	NA	NA	NA	NA	NA	no
Gm28830	1	48527639	ENSMUSG00000100866	predicted gene 28830 [Source:MGI Symbol;Acc:MGI:5579536]	0	0	0	0	0	0	0	0	0	0	NA	NA	NA	NA	NA	no	0	NA	NA	NA	NA	NA	no	0	NA	NA	NA	NA	NA	no
Gm8354	1	48731579	ENSMUSG00000101721	predicted gene 8354 [Source:MGI Symbol;Acc:MGI:3645192]	0	0	0	0	0	0	0	0	0	0	NA	NA	NA	NA	NA	no	0	NA	NA	NA	NA	NA	no	0	NA	NA	NA	NA	NA	no
Gm19124	1	48783663	ENSMUSG00000099376	predicted gene, 19124 [Source:MGI Symbol;Acc:MGI:5011309]	0	0	0	0	0	0	0	0	0	0	NA	NA	NA	NA	NA	no	0	NA	NA	NA	NA	NA	no	0	NA	NA	NA	NA	NA	no
Gm8357	1	48881713	ENSMUSG00000097883	predicted gene 8357 [Source:MGI Symbol;Acc:MGI:3645186]	0	0	0	0	0	0	0	0	0	0	NA	NA	NA	NA	NA	no	0	NA	NA	NA	NA	NA	no	0	NA	NA	NA	NA	NA	no
Gm22693	1	49095444	ENSMUSG00000092790	predicted gene, 22693 [Source:MGI Symbol;Acc:MGI:5452470]	0	0	0	0	0	0	0	0	0	0	NA	NA	NA	NA	NA	no	0	NA	NA	NA	NA	NA	no	0	NA	NA	NA	NA	NA	no
Gm28740	1	49173160	ENSMUSG00000099698	predicted gene 28740 [Source:MGI Symbol;Acc:MGI:5579446]	0	0	0	0	0	0	0	0	0	0	NA	NA	NA	NA	NA	no	0	NA	NA	NA	NA	NA	no	0	NA	NA	NA	NA	NA	no
Gm8367	1	49236252	ENSMUSG00000099454	predicted gene 8367 [Source:MGI Symbol;Acc:MGI:3645196]	0	0	0	0	0	0	0	0	0	0	NA	NA	NA	NA	NA	no	0	NA	NA	NA	NA	NA	no	0	NA	NA	NA	NA	NA	no
C230029F24Rik	1	49244616	ENSMUSG00000051616	RIKEN cDNA C230029F24 gene [Source:MGI Symbol;Acc:MGI:3045370]	0	0	0	0	0	0	0	0	0	0	NA	NA	NA	NA	NA	no	0	NA	NA	NA	NA	NA	no	0	NA	NA	NA	NA	NA	no
Gm6757	1	49399024	ENSMUSG00000099627	predicted gene 6757 [Source:MGI Symbol;Acc:MGI:3648801]	0	0	0	0	0	0	0	0	0	0	NA	NA	NA	NA	NA	no	0	NA	NA	NA	NA	NA	no	0	NA	NA	NA	NA	NA	no
Gm3605	1	49498553	ENSMUSG00000099577	predicted gene 3605 [Source:MGI Symbol;Acc:MGI:3781782]	0	0	0	0	0	0	0	0	0	0	NA	NA	NA	NA	NA	no	0	NA	NA	NA	NA	NA	no	0	NA	NA	NA	NA	NA	no
Gm28388	1	49579150	ENSMUSG00000099882	predicted gene 28388 [Source:MGI Symbol;Acc:MGI:5579094]	0	0	0	0	0	0	0	0	0	0	NA	NA	NA	NA	NA	no	0	NA	NA	NA	NA	NA	no	0	NA	NA	NA	NA	NA	no
Gm8384	1	50056782	ENSMUSG00000101760	predicted gene 8384 [Source:MGI Symbol;Acc:MGI:3648814]	0	0	0	0	0	0	0	0	0	0	NA	NA	NA	NA	NA	no	0	NA	NA	NA	NA	NA	no	0	NA	NA	NA	NA	NA	no
4933411E06Rik	1	50107470	ENSMUSG00000099608	RIKEN cDNA 4933411E06 gene [Source:MGI Symbol;Acc:MGI:1918431]	0	0	0	0	0	0	0	0	0	0	NA	NA	NA	NA	NA	no	0	NA	NA	NA	NA	NA	no	0	NA	NA	NA	NA	NA	no
Gm8391	1	50177566	ENSMUSG00000099864	predicted gene 8391 [Source:MGI Symbol;Acc:MGI:3648160]	0	0	0	0	0	0	0	0	0	0	NA	NA	NA	NA	NA	no	0	NA	NA	NA	NA	NA	no	0	NA	NA	NA	NA	NA	no
Gm27330	1	50222389	ENSMUSG00000098249	predicted gene, 27330 [Source:MGI Symbol;Acc:MGI:5530712]	0	0	0	0	0	0	0	0	0	0	NA	NA	NA	NA	NA	no	0	NA	NA	NA	NA	NA	no	0	NA	NA	NA	NA	NA	no
Gm29665	1	50397552	ENSMUSG00000100451	predicted gene 29665 [Source:MGI Symbol;Acc:MGI:5580371]	0	0	0	0	0	0	0	0	0	0	NA	NA	NA	NA	NA	no	0	NA	NA	NA	NA	NA	no	0	NA	NA	NA	NA	NA	no
Gm20118	1	50533030	ENSMUSG00000099941	predicted gene, 20118 [Source:MGI Symbol;Acc:MGI:5012303]	0	0	0	0	0	0	0	0	0	0	NA	NA	NA	NA	NA	no	0	NA	NA	NA	NA	NA	no	0	NA	NA	NA	NA	NA	no
Gm25843	1	50559762	ENSMUSG00000084531	predicted gene, 25843 [Source:MGI Symbol;Acc:MGI:5455620]	0	0	0	0	0	0	0	0	0	0	NA	NA	NA	NA	NA	no	0	NA	NA	NA	NA	NA	no	0	NA	NA	NA	NA	NA	no
Gm28321	1	50815375	ENSMUSG00000100816	predicted gene 28321 [Source:MGI Symbol;Acc:MGI:5579027]	0	0	0	0	0	0	0	0	0	0	NA	NA	NA	NA	NA	no	0	NA	NA	NA	NA	NA	no	0	NA	NA	NA	NA	NA	no
Tmeff2	1	50900647	ENSMUSG00000026109	transmembrane protein with EGF-like and two follistatin-like domains 2 [Source:MGI Symbol;Acc:MGI:1861735]	0	0	0	0	0	0	1	0	0	0.065138	-0.270919	2.40591	-0.112606	0.910343	NA	no	0.065138	-0.363204	2.40591	-0.150963	0.880005	NA	no	0.065138	0	2.40591	0	1	NA	no
Gm28322	1	50904444	ENSMUSG00000100671	predicted gene 28322 [Source:MGI Symbol;Acc:MGI:5579028]	0	0	0	0	0	0	0	0	0	0	NA	NA	NA	NA	NA	no	0	NA	NA	NA	NA	NA	no	0	NA	NA	NA	NA	NA	no
Gm25736	1	51015313	ENSMUSG00000092906	predicted gene, 25736 [Source:MGI Symbol;Acc:MGI:5455513]	0	0	0	0	0	0	0	0	0	0	NA	NA	NA	NA	NA	no	0	NA	NA	NA	NA	NA	no	0	NA	NA	NA	NA	NA	no
Gm28319	1	51138281	ENSMUSG00000101242	predicted gene 28319 [Source:MGI Symbol;Acc:MGI:5579025]	0	0	0	0	0	0	0	0	0	0	NA	NA	NA	NA	NA	no	0	NA	NA	NA	NA	NA	no	0	NA	NA	NA	NA	NA	no
Gm28320	1	51148309	ENSMUSG00000099924	predicted gene 28320 [Source:MGI Symbol;Acc:MGI:5579026]	0	0	0	0	0	0	0	0	0	0	NA	NA	NA	NA	NA	no	0	NA	NA	NA	NA	NA	no	0	NA	NA	NA	NA	NA	no
Gm29325	1	51195221	ENSMUSG00000099625	predicted gene 29325 [Source:MGI Symbol;Acc:MGI:5580031]	0	0	0	0	0	0	0	0	0	0	NA	NA	NA	NA	NA	no	0	NA	NA	NA	NA	NA	no	0	NA	NA	NA	NA	NA	no
9330175M20Rik	1	51218386	ENSMUSG00000101799	RIKEN cDNA 9330175M20 gene [Source:MGI Symbol;Acc:MGI:3045285]	0	0	0	0	0	0	0	0	0	0	NA	NA	NA	NA	NA	no	0	NA	NA	NA	NA	NA	no	0	NA	NA	NA	NA	NA	no
Cavin2	1	51289126	ENSMUSG00000045954	caveolae associated 2 [Source:MGI Symbol;Acc:MGI:99513]	1	5	1	0	2	0	2	2	2	1.62856	0.704439	1.9895	0.354079	0.72328	NA	no	1.62856	-0.912766	2.03444	-0.448657	0.653679	NA	no	1.62856	1.6172	2.0304	0.796496	0.425744	NA	no
Gm5253	1	51317528	ENSMUSG00000099741	predicted gene 5253 [Source:MGI Symbol;Acc:MGI:3779481]	0	0	0	0	0	0	0	0	0	0	NA	NA	NA	NA	NA	no	0	NA	NA	NA	NA	NA	no	0	NA	NA	NA	NA	NA	no
1700072G22Rik	1	51457932	ENSMUSG00000101702	RIKEN cDNA 1700072G22 gene [Source:MGI Symbol;Acc:MGI:1920746]	0	0	0	0	0	0	0	0	0	0	NA	NA	NA	NA	NA	no	0	NA	NA	NA	NA	NA	no	0	NA	NA	NA	NA	NA	no
Nabp1	1	51465862	ENSMUSG00000026107	nucleic acid binding protein 1 [Source:MGI Symbol;Acc:MGI:1923258]	344	2	85	506	105	34	11	326	267	165.627	-0.320867	1.46238	-0.219414	0.826328	1	no	165.627	0.331615	1.46184	0.226848	0.820542	1	no	165.627	-0.652482	1.46237	-0.44618	0.655467	1	no
Gm17767	1	51507086	ENSMUSG00000099413	predicted gene, 17767 [Source:MGI Symbol;Acc:MGI:5009931]	47	0	0	0	0	0	0	0	0	4.41173	5.07918	2.38643	2.12836	NA	NA	no	4.41173	0	2.40591	0	NA	NA	no	4.41173	4.98716	2.38643	2.0898	NA	NA	no
Gm37535	1	51527005	ENSMUSG00000103424	predicted gene, 37535 [Source:MGI Symbol;Acc:MGI:5610763]	0	0	0	0	0	0	0	0	0	0	NA	NA	NA	NA	NA	no	0	NA	NA	NA	NA	NA	no	0	NA	NA	NA	NA	NA	no
Gm28055	1	51696324	ENSMUSG00000101741	predicted gene 28055 [Source:MGI Symbol;Acc:MGI:5578761]	0	0	0	0	0	0	0	0	0	0	NA	NA	NA	NA	NA	no	0	NA	NA	NA	NA	NA	no	0	NA	NA	NA	NA	NA	no
Myo1b	1	51749765	ENSMUSG00000018417	myosin IB [Source:MGI Symbol;Acc:MGI:107752]	3	5	2	1	0	0	2	2	2	1.82298	1.09657	1.84195	0.595331	0.551622	NA	no	1.82298	-1.65466	1.96052	-0.843991	0.398674	NA	no	1.82298	2.75123	1.94792	1.41239	0.157835	NA	no
Gm29453	1	51847840	ENSMUSG00000101724	predicted gene 29453 [Source:MGI Symbol;Acc:MGI:5580159]	0	0	0	0	0	0	0	0	0	0	NA	NA	NA	NA	NA	no	0	NA	NA	NA	NA	NA	no	0	NA	NA	NA	NA	NA	no
Gm28323	1	51877110	ENSMUSG00000100313	predicted gene 28323 [Source:MGI Symbol;Acc:MGI:5579029]	0	0	0	0	0	0	0	0	0	0	NA	NA	NA	NA	NA	no	0	NA	NA	NA	NA	NA	no	0	NA	NA	NA	NA	NA	no
Gm8419	1	51938254	ENSMUSG00000100696	predicted gene 8419 [Source:MGI Symbol;Acc:MGI:3645596]	2	0	2	3	0	0	0	0	1	0.846098	1.19064	2.3919	0.497779	0.61864	NA	no	0.846098	0.962715	2.39236	0.402412	0.687381	NA	no	0.846098	0.227923	2.3858	0.095533	0.923891	NA	no
Gm27607	1	51938974	ENSMUSG00000099135	predicted gene, 27607 [Source:MGI Symbol;Acc:MGI:5530989]	0	0	0	0	0	0	0	0	0	0	NA	NA	NA	NA	NA	no	0	NA	NA	NA	NA	NA	no	0	NA	NA	NA	NA	NA	no
Gm8420	1	51940664	ENSMUSG00000072324	predicted gene 8420 [Source:MGI Symbol;Acc:MGI:3645594]	1	2	1	2	1	0	0	0	2	1.03076	0.830097	2.29175	0.362211	0.717194	NA	no	1.03076	0.422077	2.29522	0.183893	0.854097	NA	no	1.03076	0.40802	2.29015	0.178163	0.858595	NA	no
Stat4	1	51987148	ENSMUSG00000062939	signal transducer and activator of transcription 4 [Source:MGI Symbol;Acc:MGI:103062]	187	156	100	89	102	34	144	44	333	123.188	0.0725771	0.992513	0.0731246	0.941707	1	no	123.188	-0.98	0.994207	-0.98571	0.324275	1	no	123.188	1.05258	0.994715	1.05817	0.289978	1	no
Gm28177	1	52077261	ENSMUSG00000101628	predicted gene 28177 [Source:MGI Symbol;Acc:MGI:5578883]	0	0	0	0	14	0	0	0	0	1.5002	0	2.40591	0	NA	NA	no	1.5002	3.31892	2.38893	1.38929	NA	NA	no	1.5002	-3.02276	2.38893	-1.26532	NA	NA	no
Gm3940	1	52090635	ENSMUSG00000078291	predicted gene 3940 [Source:MGI Symbol;Acc:MGI:3782114]	2	3	6	1	4	1	7	3	4	3.02853	0.186128	1.46738	0.126844	0.899064	NA	no	3.02853	-0.734373	1.49578	-0.490963	0.623453	NA	no	3.02853	0.920501	1.50365	0.612177	0.540421	NA	no
Gm31812	1	52108121	ENSMUSG00000109599	predicted gene, 31812 [Source:MGI Symbol;Acc:MGI:5590971]	0	0	0	0	0	0	0	0	0	0	NA	NA	NA	NA	NA	no	0	NA	NA	NA	NA	NA	no	0	NA	NA	NA	NA	NA	no
Stat1	1	52119440	ENSMUSG00000026104	signal transducer and activator of transcription 1 [Source:MGI Symbol;Acc:MGI:103063]	424	163	546	342	514	528	1452	722	290	445.536	-0.525691	0.706845	-0.743714	0.45705	0.988321	no	445.536	-0.343915	0.70657	-0.486739	0.626444	1	no	445.536	-0.181775	0.707206	-0.257033	0.797153	1	no
Gm18301	1	52134443	ENSMUSG00000099569	predicted gene, 18301 [Source:MGI Symbol;Acc:MGI:5010486]	0	0	0	0	0	0	0	0	0	0	NA	NA	NA	NA	NA	no	0	NA	NA	NA	NA	NA	no	0	NA	NA	NA	NA	NA	no
Gls	1	52163448	ENSMUSG00000026103	glutaminase [Source:MGI Symbol;Acc:MGI:95752]	156	629	343	213	377	418	200	1143	327	379.329	0.0834865	0.943432	0.0884923	0.929485	1	no	379.329	-0.377313	0.943601	-0.399864	0.689256	1	no	379.329	0.460799	0.943791	0.488243	0.625378	1	no
Gm5975	1	52287697	ENSMUSG00000099648	predicted gene 5975 [Source:MGI Symbol;Acc:MGI:3646539]	0	0	0	0	0	0	0	0	0	0	NA	NA	NA	NA	NA	no	0	NA	NA	NA	NA	NA	no	0	NA	NA	NA	NA	NA	no
Gm23460	1	52444436	ENSMUSG00000065192	predicted gene, 23460 [Source:MGI Symbol;Acc:MGI:5453237]	0	0	0	0	0	0	0	0	0	0	NA	NA	NA	NA	NA	no	0	NA	NA	NA	NA	NA	no	0	NA	NA	NA	NA	NA	no
Nab1	1	52457294	ENSMUSG00000002881	Ngfi-A binding protein 1 [Source:MGI Symbol;Acc:MGI:107564]	406	72	293	1	303	93	219	76	134	156.724	1.14691	1.29346	0.8867	0.375241	0.964688	no	156.724	0.240824	1.29403	0.186104	0.852363	1	no	156.724	0.906085	1.29353	0.700473	0.483632	1	no
Gm5976	1	52503234	ENSMUSG00000097833	predicted gene 5976 [Source:MGI Symbol;Acc:MGI:3646538]	0	0	0	0	0	0	0	0	0	0	NA	NA	NA	NA	NA	no	0	NA	NA	NA	NA	NA	no	0	NA	NA	NA	NA	NA	no
Rps27a-ps1	1	52522239	ENSMUSG00000101501	ribosomal protein S27A, pseudogene 1 [Source:MGI Symbol;Acc:MGI:3781839]	107	168	115	191	385	26	17	34	51	120.503	2.24058	1.06888	2.09619	0.0360651	0.375806	no	120.503	2.67954	1.06819	2.50849	0.0121248	0.2245	no	120.503	-0.43896	1.06345	-0.412768	0.679776	1	no
Gm553	1	52522902	ENSMUSG00000100120	predicted gene 553 [Source:MGI Symbol;Acc:MGI:2685399]	0	0	0	0	0	0	0	0	0	0	NA	NA	NA	NA	NA	no	0	NA	NA	NA	NA	NA	no	0	NA	NA	NA	NA	NA	no
Gm28178	1	52570014	ENSMUSG00000099878	predicted gene 28178 [Source:MGI Symbol;Acc:MGI:5578884]	0	0	0	0	0	0	0	0	0	0	NA	NA	NA	NA	NA	no	0	NA	NA	NA	NA	NA	no	0	NA	NA	NA	NA	NA	no
Gm5527	1	52584518	ENSMUSG00000100007	predicted gene 5527 [Source:MGI Symbol;Acc:MGI:3646585]	0	1	0	0	0	0	1	0	0	0.207696	0.29616	2.40591	0.123097	0.902031	NA	no	0.207696	-0.363204	2.40591	-0.150963	0.880005	NA	no	0.207696	0.659364	2.40591	0.27406	0.784039	NA	no
Nemp2	1	52630703	ENSMUSG00000043015	nuclear envelope integral membrane protein 2 [Source:MGI Symbol;Acc:MGI:2444113]	0	0	0	0	0	74	0	13	151	24.0257	-4.01283	2.36605	-1.69601	NA	NA	no	24.0257	-0.949724	2.35882	-0.402627	NA	NA	no	24.0257	-3.06311	2.36655	-1.29433	NA	NA	no
Gm37242	1	52653808	ENSMUSG00000103630	predicted gene, 37242 [Source:MGI Symbol;Acc:MGI:5610470]	0	0	0	0	0	0	0	0	0	0	NA	NA	NA	NA	NA	no	0	NA	NA	NA	NA	NA	no	0	NA	NA	NA	NA	NA	no
Mfsd6	1	52656286	ENSMUSG00000041439	major facilitator superfamily domain containing 6 [Source:MGI Symbol;Acc:MGI:1922925]	27	17	6	298	0	133	163	2	45	66.0383	-1.27652	1.60927	-0.793228	0.427645	0.981006	no	66.0383	1.34558	1.60349	0.839153	0.401383	1	no	66.0383	-2.6221	1.60826	-1.63039	0.103019	0.724082	no
Gm29670	1	52702272	ENSMUSG00000100302	predicted gene 29670 [Source:MGI Symbol;Acc:MGI:5580376]	0	0	0	0	0	0	0	0	0	0	NA	NA	NA	NA	NA	no	0	NA	NA	NA	NA	NA	no	0	NA	NA	NA	NA	NA	no
Gm28650	1	52756719	ENSMUSG00000100230	predicted gene 28650 [Source:MGI Symbol;Acc:MGI:5579356]	0	0	0	0	0	0	0	0	0	0	NA	NA	NA	NA	NA	no	0	NA	NA	NA	NA	NA	no	0	NA	NA	NA	NA	NA	no
Inpp1	1	52785427	ENSMUSG00000026102	inositol polyphosphate-1-phosphatase [Source:MGI Symbol;Acc:MGI:104848]	176	13	145	451	156	113	1137	623	833	321.377	-2.4947	0.974356	-2.56036	0.0104565	0.192581	no	321.377	-1.40308	0.972657	-1.44252	0.149155	0.84687	no	321.377	-1.09162	0.975199	-1.11938	0.262977	1	no
Hibch	1	52844929	ENSMUSG00000041426	3-hydroxyisobutyryl-Coenzyme A hydrolase [Source:MGI Symbol;Acc:MGI:1923792]	331	0	589	254	0	39	3	108	62	143.302	2.22623	1.85511	1.20005	0.23012	0.858404	no	143.302	0.862862	1.85556	0.465014	0.641922	1	no	143.302	1.36337	1.85475	0.73507	0.462297	1	no
Gm16107	1	52873137	ENSMUSG00000089802	predicted gene 16107 [Source:MGI Symbol;Acc:MGI:3801820]	0	0	0	0	0	0	0	0	0	0	NA	NA	NA	NA	NA	no	0	NA	NA	NA	NA	NA	no	0	NA	NA	NA	NA	NA	no
1700019D03Rik	1	52922324	ENSMUSG00000043629	RIKEN cDNA 1700019D03 gene [Source:MGI Symbol;Acc:MGI:1914330]	0	1	0	0	0	0	0	1	0	0.217981	0.29616	2.40591	0.123097	0.902031	NA	no	0.217981	-0.363204	2.40591	-0.150963	0.880005	NA	no	0.217981	0.659364	2.40591	0.27406	0.784039	NA	no
Mstn	1	53061640	ENSMUSG00000026100	myostatin [Source:MGI Symbol;Acc:MGI:95691]	0	0	0	0	0	0	0	0	0	0	NA	NA	NA	NA	NA	no	0	NA	NA	NA	NA	NA	no	0	NA	NA	NA	NA	NA	no
Gm24349	1	53100050	ENSMUSG00000089334	predicted gene, 24349 [Source:MGI Symbol;Acc:MGI:5454126]	0	0	0	0	0	0	0	0	0	0	NA	NA	NA	NA	NA	no	0	NA	NA	NA	NA	NA	no	0	NA	NA	NA	NA	NA	no
1700019A02Rik	1	53158577	ENSMUSG00000060715	RIKEN cDNA 1700019A02 gene [Source:MGI Symbol;Acc:MGI:1916647]	0	0	0	0	0	0	0	0	0	0	NA	NA	NA	NA	NA	no	0	NA	NA	NA	NA	NA	no	0	NA	NA	NA	NA	NA	no
Pms1	1	53189187	ENSMUSG00000026098	postmeiotic segregation increased 1 (S. cerevisiae) [Source:MGI Symbol;Acc:MGI:1202302]	93	0	137	171	0	68	42	34	0	54.3091	1.73444	1.93791	0.895004	0.370785	0.964688	no	54.3091	1.77655	1.93775	0.916813	0.359241	1	no	54.3091	-0.0421196	1.93622	-0.0217535	0.982645	1	no
Gm28777	1	53196113	ENSMUSG00000100763	predicted gene 28777 [Source:MGI Symbol;Acc:MGI:5579483]	0	0	0	0	0	0	0	0	0	0	NA	NA	NA	NA	NA	no	0	NA	NA	NA	NA	NA	no	0	NA	NA	NA	NA	NA	no
Ormdl1	1	53297095	ENSMUSG00000026097	ORM1-like 1 (S. cerevisiae) [Source:MGI Symbol;Acc:MGI:2181669]	75	2	76	31	280	1	0	1	0	49.3851	5.96451	1.76878	3.3721	0.000745983	0.0407827	yes	49.3851	6.9259	1.76737	3.91877	8.90019e-05	0.010574	yes	49.3851	-0.961394	1.65216	-0.581902	0.560633	1	no
Gm28778	1	53297111	ENSMUSG00000100679	predicted gene 28778 [Source:MGI Symbol;Acc:MGI:5579484]	0	0	0	0	0	0	0	0	0	0	NA	NA	NA	NA	NA	no	0	NA	NA	NA	NA	NA	no	0	NA	NA	NA	NA	NA	no
Osgepl1	1	53313624	ENSMUSG00000026096	O-sialoglycoprotein endopeptidase-like 1 [Source:MGI Symbol;Acc:MGI:1919335]	89	0	0	2	0	0	0	0	0	8.57229	4.82459	2.38153	2.02584	NA	NA	no	8.57229	1.25086	2.39198	0.52294	NA	NA	no	8.57229	3.57373	2.37238	1.50639	NA	NA	no
Gm28551	1	53325507	ENSMUSG00000099913	predicted gene 28551 [Source:MGI Symbol;Acc:MGI:5579257]	0	0	0	0	0	0	0	0	0	0	NA	NA	NA	NA	NA	no	0	NA	NA	NA	NA	NA	no	0	NA	NA	NA	NA	NA	no
Gm18800	1	53326206	ENSMUSG00000101838	predicted gene, 18800 [Source:MGI Symbol;Acc:MGI:5010985]	0	0	0	0	0	0	0	0	0	0	NA	NA	NA	NA	NA	no	0	NA	NA	NA	NA	NA	no	0	NA	NA	NA	NA	NA	no
Asnsd1	1	53344617	ENSMUSG00000026095	asparagine synthetase domain containing 1 [Source:MGI Symbol;Acc:MGI:1917646]	28	0	0	4	0	243	311	0	337	81.9584	-3.13807	2.16378	-1.45028	0.146981	0.736886	no	81.9584	-1.00072	2.16142	-0.462993	0.643369	1	no	81.9584	-2.13735	2.16413	-0.987625	0.323336	1	no
Gm28779	1	53362149	ENSMUSG00000100267	predicted gene 28779 [Source:MGI Symbol;Acc:MGI:5579485]	0	0	0	0	0	0	0	0	0	0	NA	NA	NA	NA	NA	no	0	NA	NA	NA	NA	NA	no	0	NA	NA	NA	NA	NA	no
Gm6799	1	53363114	ENSMUSG00000099450	predicted gene 6799 [Source:MGI Symbol;Acc:MGI:3646265]	0	0	0	0	0	0	0	0	0	0	NA	NA	NA	NA	NA	no	0	NA	NA	NA	NA	NA	no	0	NA	NA	NA	NA	NA	no
Gm6801	1	53390415	ENSMUSG00000100069	predicted gene 6801 [Source:MGI Symbol;Acc:MGI:3643101]	0	0	0	0	0	0	0	0	0	0	NA	NA	NA	NA	NA	no	0	NA	NA	NA	NA	NA	no	0	NA	NA	NA	NA	NA	no
Dnah7a	1	53397006	ENSMUSG00000096141	dynein, axonemal, heavy chain 7A [Source:MGI Symbol;Acc:MGI:2685838]	0	20	71	0	0	46	0	0	2	15.2692	3.48455	2.28817	1.52285	0.127795	0.691976	no	15.2692	2.49471	2.28907	1.08984	0.275785	1	no	15.2692	0.989838	2.28084	0.43398	0.664303	1	no
Gm25240	1	53443271	ENSMUSG00000092657	predicted gene, 25240 [Source:MGI Symbol;Acc:MGI:5455017]	0	0	0	0	0	0	0	0	0	0	NA	NA	NA	NA	NA	no	0	NA	NA	NA	NA	NA	no	0	NA	NA	NA	NA	NA	no
Stk17b	1	53755506	ENSMUSG00000026094	serine/threonine kinase 17b (apoptosis-inducing) [Source:MGI Symbol;Acc:MGI:2138162]	1049	1270	1593	1904	1517	1559	979	2768	1622	1418.86	0.0352916	0.677266	0.052109	0.958442	1	no	1418.86	0.20053	0.677191	0.296121	0.767138	1	no	1418.86	-0.165239	0.677288	-0.243971	0.807253	1	no
Gm37863	1	53791201	ENSMUSG00000102405	predicted gene, 37863 [Source:MGI Symbol;Acc:MGI:5611091]	0	0	0	0	0	0	0	0	0	0	NA	NA	NA	NA	NA	no	0	NA	NA	NA	NA	NA	no	0	NA	NA	NA	NA	NA	no
Hecw2	1	53806876	ENSMUSG00000042807	HECT, C2 and WW domain containing E3 ubiquitin protein ligase 2 [Source:MGI Symbol;Acc:MGI:2685817]	0	0	0	0	0	0	0	0	0	0	NA	NA	NA	NA	NA	no	0	NA	NA	NA	NA	NA	no	0	NA	NA	NA	NA	NA	no
Mir7681	1	53849424	ENSMUSG00000098443	microRNA 7681 [Source:MGI Symbol;Acc:MGI:5531188]	0	0	0	0	0	0	0	0	0	0	NA	NA	NA	NA	NA	no	0	NA	NA	NA	NA	NA	no	0	NA	NA	NA	NA	NA	no
Gm24251	1	53886828	ENSMUSG00000087949	predicted gene, 24251 [Source:MGI Symbol;Acc:MGI:5454028]	0	0	0	0	0	0	0	0	0	0	NA	NA	NA	NA	NA	no	0	NA	NA	NA	NA	NA	no	0	NA	NA	NA	NA	NA	no
Gm37633	1	54152397	ENSMUSG00000102868	predicted gene, 37633 [Source:MGI Symbol;Acc:MGI:5610861]	0	0	0	0	0	0	0	0	0	0	NA	NA	NA	NA	NA	no	0	NA	NA	NA	NA	NA	no	0	NA	NA	NA	NA	NA	no
Gm25829	1	54249102	ENSMUSG00000094013	predicted gene, 25829 [Source:MGI Symbol;Acc:MGI:5455606]	0	0	0	0	0	0	1	0	0	0.065138	-0.270919	2.40591	-0.112606	0.910343	NA	no	0.065138	-0.363204	2.40591	-0.150963	0.880005	NA	no	0.065138	0	2.40591	0	1	NA	no
Ccdc150	1	54250683	ENSMUSG00000025983	coiled-coil domain containing 150 [Source:MGI Symbol;Acc:MGI:1925266]	0	0	0	0	0	0	0	0	0	0	NA	NA	NA	NA	NA	no	0	NA	NA	NA	NA	NA	no	0	NA	NA	NA	NA	NA	no
Gtf3c3	1	54396004	ENSMUSG00000041303	general transcription factor IIIC, polypeptide 3 [Source:MGI Symbol;Acc:MGI:2138383]	0	1	15	0	0	17	0	95	1	10.6671	-1.4072	2.26335	-0.621731	NA	NA	no	10.6671	-1.54319	2.26324	-0.68185	NA	NA	no	10.6671	0.135993	2.26656	0.0599996	NA	NA	no
Gm34066	1	54443404	ENSMUSG00000109809	predicted gene, 34066 [Source:MGI Symbol;Acc:MGI:5593225]	0	0	0	0	0	0	0	0	0	0	NA	NA	NA	NA	NA	no	0	NA	NA	NA	NA	NA	no	0	NA	NA	NA	NA	NA	no
Pgap1	1	54472994	ENSMUSG00000073678	post-GPI attachment to proteins 1 [Source:MGI Symbol;Acc:MGI:2443342]	1	4	0	2	0	18	3	7	0	3.2713	-0.107351	2.13636	-0.0502496	0.959923	NA	no	3.2713	1.04072	2.12367	0.490058	0.624093	NA	no	3.2713	-1.14807	2.13087	-0.53878	0.590039	NA	no
Gm36955	1	54518610	ENSMUSG00000104136	predicted gene, 36955 [Source:MGI Symbol;Acc:MGI:5610183]	0	0	0	0	0	0	0	0	0	0	NA	NA	NA	NA	NA	no	0	NA	NA	NA	NA	NA	no	0	NA	NA	NA	NA	NA	no
Gm19637	1	54566703	ENSMUSG00000101130	predicted gene, 19637 [Source:MGI Symbol;Acc:MGI:5011822]	0	0	0	0	0	0	0	0	0	0	NA	NA	NA	NA	NA	no	0	NA	NA	NA	NA	NA	no	0	NA	NA	NA	NA	NA	no
Ankrd44	1	54645340	ENSMUSG00000052331	ankyrin repeat domain 44 [Source:MGI Symbol;Acc:MGI:3045243]	936	581	1314	1162	1706	1080	2599	683	1484	1107.25	-0.252493	0.703912	-0.3587	0.71982	1	no	1107.25	0.105627	0.703759	0.15009	0.880694	1	no	1107.25	-0.35812	0.703958	-0.508723	0.610946	1	no
4930444A19Rik	1	54681729	ENSMUSG00000101674	RIKEN cDNA 4930444A19 gene [Source:MGI Symbol;Acc:MGI:1921230]	0	0	0	0	0	0	0	0	0	0	NA	NA	NA	NA	NA	no	0	NA	NA	NA	NA	NA	no	0	NA	NA	NA	NA	NA	no
Gm37370	1	54737166	ENSMUSG00000102503	predicted gene, 37370 [Source:MGI Symbol;Acc:MGI:5610598]	0	0	0	27	0	0	0	0	0	2.94518	0	2.40591	0	NA	NA	no	2.94518	4.00596	2.3868	1.67838	NA	NA	no	2.94518	-3.7098	2.3868	-1.5543	NA	NA	no
Gm24053	1	54769218	ENSMUSG00000089245	predicted gene, 24053 [Source:MGI Symbol;Acc:MGI:5453830]	0	0	0	0	0	0	0	0	0	0	NA	NA	NA	NA	NA	no	0	NA	NA	NA	NA	NA	no	0	NA	NA	NA	NA	NA	no
A130048G24Rik	1	54913845	ENSMUSG00000102642	RIKEN cDNA A130048G24 gene [Source:MGI Symbol;Acc:MGI:2443520]	0	0	0	173	0	23	0	47	52	30.1222	-4.69571	2.18596	-2.14812	0.0317038	0.349941	no	30.1222	0.967723	2.1364	0.452969	0.650571	1	no	30.1222	-5.66343	2.18546	-2.59142	0.00955817	0.214651	no
Sf3b1	1	54985169	ENSMUSG00000025982	splicing factor 3b, subunit 1 [Source:MGI Symbol;Acc:MGI:1932339]	1426	1400	806	1759	1913	1332	4824	938	819	1416.6	-0.154389	0.793885	-0.194473	0.845805	1	no	1416.6	0.133654	0.793797	0.168372	0.86629	1	no	1416.6	-0.288043	0.793913	-0.362814	0.716744	1	no
E330011M16Rik	1	55051319	ENSMUSG00000103030	RIKEN cDNA E330011M16 gene [Source:MGI Symbol;Acc:MGI:3704186]	0	67	0	0	0	0	0	0	0	9.55137	5.60215	2.38522	2.3487	NA	NA	no	9.55137	0	2.40591	0	NA	NA	no	9.55137	5.52057	2.38522	2.31449	NA	NA	no
Coq10b	1	55052770	ENSMUSG00000025981	coenzyme Q10B [Source:MGI Symbol;Acc:MGI:1915126]	14	0	203	185	68	10	214	0	1	66.4741	0.620638	1.93205	0.321232	0.748034	1	no	66.4741	0.81562	1.93181	0.422204	0.672876	1	no	66.4741	-0.194982	1.93171	-0.100937	0.9196	1	no
Gm17971	1	55066264	ENSMUSG00000101122	predicted gene, 17971 [Source:MGI Symbol;Acc:MGI:5010156]	41	1	0	0	0	1	0	0	0	4.08363	4.26926	2.38612	1.7892	NA	NA	no	4.08363	0.74242	2.40421	0.3088	NA	NA	no	4.08363	3.52684	2.3845	1.47907	NA	NA	no
Hspd1	1	55077835	ENSMUSG00000025980	heat shock protein 1 (chaperonin) [Source:MGI Symbol;Acc:MGI:96242]	112	67	451	0	145	100	260	695	430	210.816	-0.650651	1.38362	-0.470251	0.638176	1	no	210.816	-2.02266	1.38474	-1.46068	0.144104	0.83549	no	210.816	1.37201	1.38521	0.990467	0.321946	1	no
Hspe1	1	55088132	ENSMUSG00000073676	heat shock protein 1 (chaperonin 10) [Source:MGI Symbol;Acc:MGI:104680]	220	487	230	731	323	523	953	118	132	363.702	0.425367	0.947967	0.448715	0.653637	1	no	363.702	0.897601	0.947628	0.947208	0.343533	1	no	363.702	-0.472234	0.94767	-0.49831	0.618265	1	no
Gm5147	1	55120080	ENSMUSG00000100736	predicted gene 5147 [Source:MGI Symbol;Acc:MGI:3646018]	0	0	0	1	0	0	0	0	0	0.109081	0	2.40591	0	1	NA	no	0.109081	0.770953	2.40591	0.320441	0.748634	NA	no	0.109081	-0.474794	2.40591	-0.197345	0.843558	NA	no
Gm16581	1	55127297	ENSMUSG00000089670	predicted gene 16581 [Source:MGI Symbol;Acc:MGI:4415001]	0	0	0	0	0	0	0	0	0	0	NA	NA	NA	NA	NA	no	0	NA	NA	NA	NA	NA	no	0	NA	NA	NA	NA	NA	no
Mob4	1	55131231	ENSMUSG00000025979	MOB family member 4, phocein [Source:MGI Symbol;Acc:MGI:104899]	737	325	358	58	280	380	426	938	216	348.742	0.343529	0.855915	0.401359	0.688156	1	no	348.742	-0.742486	0.856625	-0.866757	0.386075	1	no	348.742	1.08602	0.856704	1.26767	0.204917	0.97131	no
Gm6822	1	55160747	ENSMUSG00000061863	predicted pseudogene 6822 [Source:MGI Symbol;Acc:MGI:3644721]	0	0	0	2	0	0	7	1	0	0.749551	-1.91847	2.39195	-0.802052	0.422523	NA	no	0.749551	-0.868878	2.38616	-0.364133	0.715759	NA	no	0.749551	-1.04959	2.40084	-0.437178	0.661982	NA	no
Rftn2	1	55170159	ENSMUSG00000025978	raftlin family member 2 [Source:MGI Symbol;Acc:MGI:1921263]	0	0	0	0	0	77	0	0	0	7.12534	0	2.40591	0	NA	NA	no	7.12534	5.39084	2.3854	2.25993	NA	NA	no	7.12534	-5.2621	2.3854	-2.20596	NA	NA	no
Gm10561	1	55226251	ENSMUSG00000097649	predicted gene 10561 [Source:MGI Symbol;Acc:MGI:3648163]	0	0	0	0	0	0	0	0	0	0	NA	NA	NA	NA	NA	no	0	NA	NA	NA	NA	NA	no	0	NA	NA	NA	NA	NA	no
Mars2	1	55237177	ENSMUSG00000046994	methionine-tRNA synthetase 2 (mitochondrial) [Source:MGI Symbol;Acc:MGI:2444136]	10	0	0	73	0	30	5	0	55	17.9031	-1.89995	2.15776	-0.880519	0.378578	0.964967	no	17.9031	0.607087	2.14971	0.282405	0.777633	1	no	17.9031	-2.50703	2.15743	-1.16205	0.245216	1	no
Boll	1	55248658	ENSMUSG00000025977	bol, boule-like (Drosophila) [Source:MGI Symbol;Acc:MGI:1922638]	0	0	0	0	0	0	0	0	0	0	NA	NA	NA	NA	NA	no	0	NA	NA	NA	NA	NA	no	0	NA	NA	NA	NA	NA	no
Gm8292	1	55335401	ENSMUSG00000100215	predicted gene 8292 [Source:MGI Symbol;Acc:MGI:3648460]	117	13	34	47	5	9	2	3	55	29.3929	1.28282	1.45904	0.87922	0.379282	0.965205	no	29.3929	0.0547653	1.46274	0.0374402	0.970134	1	no	29.3929	1.22805	1.46023	0.840997	0.40035	1	no
Gm29138	1	55370016	ENSMUSG00000101945	predicted gene 29138 [Source:MGI Symbol;Acc:MGI:5579844]	0	0	0	0	0	0	0	0	0	0	NA	NA	NA	NA	NA	no	0	NA	NA	NA	NA	NA	no	0	NA	NA	NA	NA	NA	no
Gm8531	1	55381195	ENSMUSG00000101085	predicted gene 8531 [Source:MGI Symbol;Acc:MGI:3645221]	0	0	0	0	0	0	0	0	0	0	NA	NA	NA	NA	NA	no	0	NA	NA	NA	NA	NA	no	0	NA	NA	NA	NA	NA	no
Plcl1	1	55405921	ENSMUSG00000038349	phospholipase C-like 1 [Source:MGI Symbol;Acc:MGI:3036262]	2	0	48	10	10	0	1	0	0	7.78775	4.20767	2.17332	1.93606	NA	NA	no	7.78775	3.1265	2.17643	1.43653	NA	NA	no	7.78775	1.08117	2.13314	0.506845	NA	NA	no
Gm38056	1	55440904	ENSMUSG00000102145	predicted gene, 38056 [Source:MGI Symbol;Acc:MGI:5611284]	0	0	0	0	0	0	33	0	0	2.14955	-3.37869	2.38688	-1.41553	NA	NA	no	2.14955	-3.47098	2.38688	-1.45419	NA	NA	no	2.14955	0	2.40591	0	NA	NA	no
Gm6644	1	55444074	ENSMUSG00000100309	predicted gene 6644 [Source:MGI Symbol;Acc:MGI:3644951]	0	0	0	0	0	0	0	0	0	0	NA	NA	NA	NA	NA	no	0	NA	NA	NA	NA	NA	no	0	NA	NA	NA	NA	NA	no
Gm37382	1	55559460	ENSMUSG00000102831	predicted gene, 37382 [Source:MGI Symbol;Acc:MGI:5610610]	0	0	0	0	0	0	0	0	0	0	NA	NA	NA	NA	NA	no	0	NA	NA	NA	NA	NA	no	0	NA	NA	NA	NA	NA	no
9130227L01Rik	1	55931241	ENSMUSG00000099950	RIKEN cDNA 9130227L01 gene [Source:MGI Symbol;Acc:MGI:2445084]	0	0	0	0	0	0	0	0	0	0	NA	NA	NA	NA	NA	no	0	NA	NA	NA	NA	NA	no	0	NA	NA	NA	NA	NA	no
Gm36986	1	55960404	ENSMUSG00000102491	predicted gene, 36986 [Source:MGI Symbol;Acc:MGI:5610214]	0	0	0	0	0	0	0	0	0	0	NA	NA	NA	NA	NA	no	0	NA	NA	NA	NA	NA	no	0	NA	NA	NA	NA	NA	no
1700003I22Rik	1	56018978	ENSMUSG00000100372	RIKEN cDNA 1700003I22 gene [Source:MGI Symbol;Acc:MGI:1916606]	0	0	0	0	0	0	0	0	0	0	NA	NA	NA	NA	NA	no	0	NA	NA	NA	NA	NA	no	0	NA	NA	NA	NA	NA	no
Gm28900	1	56451407	ENSMUSG00000100944	predicted gene 28900 [Source:MGI Symbol;Acc:MGI:5579606]	0	0	2	0	0	0	0	0	0	0.223854	1.46144	2.40516	0.607626	0.543435	NA	no	0.223854	0	2.40591	0	1	NA	no	0.223854	1.25756	2.40516	0.522861	0.601071	NA	no
Gm28240	1	56531824	ENSMUSG00000101332	predicted gene 28240 [Source:MGI Symbol;Acc:MGI:5578946]	0	0	0	0	0	0	0	0	0	0	NA	NA	NA	NA	NA	no	0	NA	NA	NA	NA	NA	no	0	NA	NA	NA	NA	NA	no
Hsfy2	1	56636044	ENSMUSG00000045336	heat shock transcription factor, Y-linked 2 [Source:MGI Symbol;Acc:MGI:1918316]	0	0	0	0	0	0	0	0	0	0	NA	NA	NA	NA	NA	no	0	NA	NA	NA	NA	NA	no	0	NA	NA	NA	NA	NA	no
Satb2	1	56793981	ENSMUSG00000038331	special AT-rich sequence binding protein 2 [Source:MGI Symbol;Acc:MGI:2679336]	0	0	0	0	0	0	0	0	0	0	NA	NA	NA	NA	NA	no	0	NA	NA	NA	NA	NA	no	0	NA	NA	NA	NA	NA	no
9130024F11Rik	1	56971412	ENSMUSG00000087022	RIKEN cDNA 9130024F11 gene [Source:MGI Symbol;Acc:MGI:1926150]	0	0	0	0	0	0	0	0	0	0	NA	NA	NA	NA	NA	no	0	NA	NA	NA	NA	NA	no	0	NA	NA	NA	NA	NA	no
Gm4081	1	56976803	ENSMUSG00000104310	predicted gene 4081 [Source:MGI Symbol;Acc:MGI:3782256]	0	0	0	0	0	0	0	0	0	0	NA	NA	NA	NA	NA	no	0	NA	NA	NA	NA	NA	no	0	NA	NA	NA	NA	NA	no
Gm23943	1	56999155	ENSMUSG00000094128	predicted gene, 23943 [Source:MGI Symbol;Acc:MGI:5453720]	0	0	0	0	0	0	0	0	0	0	NA	NA	NA	NA	NA	no	0	NA	NA	NA	NA	NA	no	0	NA	NA	NA	NA	NA	no
1700126A01Rik	1	57127340	ENSMUSG00000099945	RIKEN cDNA 1700126A01 gene [Source:MGI Symbol;Acc:MGI:1920852]	0	0	0	0	0	0	0	0	0	0	NA	NA	NA	NA	NA	no	0	NA	NA	NA	NA	NA	no	0	NA	NA	NA	NA	NA	no
BC055402	1	57200645	ENSMUSG00000101429	cDNA sequence BC055402 [Source:MGI Symbol;Acc:MGI:3039597]	0	0	0	0	0	0	0	0	0	0	NA	NA	NA	NA	NA	no	0	NA	NA	NA	NA	NA	no	0	NA	NA	NA	NA	NA	no
Gm5254	1	57291425	ENSMUSG00000101129	predicted gene 5254 [Source:MGI Symbol;Acc:MGI:3645015]	0	0	0	0	0	0	0	0	0	0	NA	NA	NA	NA	NA	no	0	NA	NA	NA	NA	NA	no	0	NA	NA	NA	NA	NA	no
4930558J18Rik	1	57359222	ENSMUSG00000097519	RIKEN cDNA 4930558J18 gene [Source:MGI Symbol;Acc:MGI:1922573]	0	0	0	14	0	0	0	0	0	1.52713	0	2.40591	0	NA	NA	no	1.52713	3.33627	2.38886	1.3966	NA	NA	no	1.52713	-3.04011	2.38886	-1.27262	NA	NA	no
1700066M21Rik	1	57377620	ENSMUSG00000038323	RIKEN cDNA 1700066M21 gene [Source:MGI Symbol;Acc:MGI:1920717]	74	0	59	0	0	0	0	0	16	15.2661	2.14507	2.34566	0.914485	NA	NA	no	15.2661	-2.45676	2.36131	-1.04042	NA	NA	no	15.2661	4.60184	2.35968	1.9502	NA	NA	no
Tyw5	1	57388237	ENSMUSG00000048495	tRNA-yW synthesizing protein 5 [Source:MGI Symbol;Acc:MGI:1915986]	5	8	46	0	0	0	0	0	0	6.75844	5.10534	2.33249	2.1888	0.0286117	NA	no	6.75844	0	2.3652	0	1	NA	no	6.75844	4.88851	2.33249	2.09583	0.0360969	NA	no
Maip1	1	57406328	ENSMUSG00000025971	matrix AAA peptidase interacting protein 1 [Source:MGI Symbol;Acc:MGI:1915365]	92	0	0	0	0	0	186	0	65	27.7238	-0.838437	2.33159	-0.359599	0.719147	1	no	27.7238	-4.25867	2.33984	-1.82007	0.068749	0.594344	no	27.7238	3.42023	2.34043	1.46137	0.143914	0.843231	no
Gm22371	1	57422244	ENSMUSG00000077776	predicted gene, 22371 [Source:MGI Symbol;Acc:MGI:5452148]	0	0	0	0	0	0	0	0	0	0	NA	NA	NA	NA	NA	no	0	NA	NA	NA	NA	NA	no	0	NA	NA	NA	NA	NA	no
Gm24014	1	57467870	ENSMUSG00000088353	predicted gene, 24014 [Source:MGI Symbol;Acc:MGI:5453791]	0	0	0	0	0	0	0	0	0	0	NA	NA	NA	NA	NA	no	0	NA	NA	NA	NA	NA	no	0	NA	NA	NA	NA	NA	no
Gm8581	1	57518523	ENSMUSG00000101826	predicted gene 8581 [Source:MGI Symbol;Acc:MGI:3647054]	0	0	0	0	0	0	0	0	0	0	NA	NA	NA	NA	NA	no	0	NA	NA	NA	NA	NA	no	0	NA	NA	NA	NA	NA	no
Gm37373	1	57520831	ENSMUSG00000102685	predicted gene, 37373 [Source:MGI Symbol;Acc:MGI:5610601]	0	0	0	0	0	0	0	0	0	0	NA	NA	NA	NA	NA	no	0	NA	NA	NA	NA	NA	no	0	NA	NA	NA	NA	NA	no
Gm17929	1	57561298	ENSMUSG00000101151	predicted gene, 17929 [Source:MGI Symbol;Acc:MGI:5010114]	0	0	0	0	0	0	0	0	0	0	NA	NA	NA	NA	NA	no	0	NA	NA	NA	NA	NA	no	0	NA	NA	NA	NA	NA	no
Spats2l	1	57774162	ENSMUSG00000038305	spermatogenesis associated, serine-rich 2-like [Source:MGI Symbol;Acc:MGI:1914448]	0	0	0	0	0	0	0	0	0	0	NA	NA	NA	NA	NA	no	0	NA	NA	NA	NA	NA	no	0	NA	NA	NA	NA	NA	no
Gm17234	1	57909835	ENSMUSG00000091283	predicted gene 17234 [Source:MGI Symbol;Acc:MGI:4938061]	0	0	0	0	0	0	0	0	0	0	NA	NA	NA	NA	NA	no	0	NA	NA	NA	NA	NA	no	0	NA	NA	NA	NA	NA	no
Kctd18	1	57955101	ENSMUSG00000054770	potassium channel tetramerisation domain containing 18 [Source:MGI Symbol;Acc:MGI:3603813]	39	2	0	37	26	0	0	0	0	10.768	4.10932	2.2638	1.81523	0.0694887	0.524291	no	10.768	4.72001	2.26238	2.08631	0.036951	0.423958	no	10.768	-0.610687	2.22398	-0.274592	0.78363	1	no
Sgo2a	1	57995971	ENSMUSG00000026039	shugoshin 2A [Source:MGI Symbol;Acc:MGI:1098767]	1	2	0	1	0	0	2	0	2	0.832876	0.0809726	2.38375	0.0339685	0.972902	NA	no	0.832876	-0.951079	2.3931	-0.397425	0.691054	NA	no	0.832876	1.03205	2.39608	0.430726	0.666668	NA	no
Aox1	1	58029931	ENSMUSG00000063558	aldehyde oxidase 1 [Source:MGI Symbol;Acc:MGI:88035]	0	0	0	0	0	0	0	0	0	0	NA	NA	NA	NA	NA	no	0	NA	NA	NA	NA	NA	no	0	NA	NA	NA	NA	NA	no
Aox3	1	58113130	ENSMUSG00000064294	aldehyde oxidase 3 [Source:MGI Symbol;Acc:MGI:1918974]	0	0	0	0	0	0	0	0	0	0	NA	NA	NA	NA	NA	no	0	NA	NA	NA	NA	NA	no	0	NA	NA	NA	NA	NA	no
Gm24548	1	58154981	ENSMUSG00000089275	predicted gene, 24548 [Source:MGI Symbol;Acc:MGI:5454325]	0	0	0	0	0	0	0	0	0	0	NA	NA	NA	NA	NA	no	0	NA	NA	NA	NA	NA	no	0	NA	NA	NA	NA	NA	no
Aox4	1	58210397	ENSMUSG00000038242	aldehyde oxidase 4 [Source:MGI Symbol;Acc:MGI:1919122]	0	0	0	0	0	0	0	0	0	0	NA	NA	NA	NA	NA	no	0	NA	NA	NA	NA	NA	no	0	NA	NA	NA	NA	NA	no
Gm15759	1	58254117	ENSMUSG00000089822	predicted gene 15759 [Source:MGI Symbol;Acc:MGI:3783202]	0	0	0	0	0	0	0	0	0	0	NA	NA	NA	NA	NA	no	0	NA	NA	NA	NA	NA	no	0	NA	NA	NA	NA	NA	no
Aox2	1	58278326	ENSMUSG00000079554	aldehyde oxidase 2 [Source:MGI Symbol;Acc:MGI:3529596]	0	0	0	0	0	0	0	0	0	0	NA	NA	NA	NA	NA	no	0	NA	NA	NA	NA	NA	no	0	NA	NA	NA	NA	NA	no
Gm37607	1	58383512	ENSMUSG00000103839	predicted gene, 37607 [Source:MGI Symbol;Acc:MGI:5610835]	0	0	0	0	0	0	0	0	0	0	NA	NA	NA	NA	NA	no	0	NA	NA	NA	NA	NA	no	0	NA	NA	NA	NA	NA	no
Bzw1	1	58392898	ENSMUSG00000051223	basic leucine zipper and W2 domains 1 [Source:MGI Symbol;Acc:MGI:1914132]	55	477	346	610	700	270	735	621	300	405.319	-0.175297	0.946826	-0.185142	0.853118	1	no	405.319	0.376715	0.946445	0.398031	0.690607	1	no	405.319	-0.552012	0.946802	-0.583028	0.559875	1	no
Clk1	1	58410189	ENSMUSG00000026034	CDC-like kinase 1 [Source:MGI Symbol;Acc:MGI:107403]	229	149	133	150	132	294	1019	665	224	255.896	-1.26288	0.667105	-1.89308	0.0583474	0.479935	no	255.896	-1.26015	0.666773	-1.88993	0.0587674	0.545614	no	255.896	-0.00272891	0.668805	-0.00408027	0.996744	1	no
Ppil3	1	58430994	ENSMUSG00000026035	peptidylprolyl isomerase (cyclophilin)-like 3 [Source:MGI Symbol;Acc:MGI:1917475]	0	2	0	18	139	71	0	78	83	38.4999	-4.62979	1.78372	-2.59557	0.00944334	0.181312	no	38.4999	0.583049	1.7192	0.33914	0.734504	1	no	38.4999	-5.21284	1.78341	-2.92296	0.0034672	0.123978	no
Nif3l1	1	58445151	ENSMUSG00000026036	Ngg1 interacting factor 3-like 1 (S. pombe) [Source:MGI Symbol;Acc:MGI:1929485]	228	0	15	120	140	137	446	367	2	120.796	-1.14277	1.59805	-0.715103	NA	NA	no	120.796	-0.425509	1.59723	-0.266405	NA	NA	no	120.796	-0.717263	1.59844	-0.448726	NA	NA	no
Orc2	1	58462771	ENSMUSG00000026037	origin recognition complex, subunit 2 [Source:MGI Symbol;Acc:MGI:1328306]	95	2	101	0	0	144	0	0	422	79.0996	-0.81873	2.23755	-0.365904	NA	NA	no	79.0996	-1.24059	2.23765	-0.554417	NA	NA	no	79.0996	0.42186	2.23795	0.188503	NA	NA	no
Gm23966	1	58466515	ENSMUSG00000094245	predicted gene, 23966 [Source:MGI Symbol;Acc:MGI:5453743]	0	0	0	0	0	0	0	0	0	0	NA	NA	NA	NA	NA	no	0	NA	NA	NA	NA	NA	no	0	NA	NA	NA	NA	NA	no
Gm15834	1	58505148	ENSMUSG00000085054	predicted gene 15834 [Source:MGI Symbol;Acc:MGI:3802168]	49	93	0	327	0	70	0	292	0	82.028	-0.213095	2.19987	-0.0968671	0.922832	1	no	82.028	0.681327	2.19954	0.309758	0.756745	1	no	82.028	-0.894422	2.19979	-0.406595	0.684305	1	no
Fam126b	1	58522806	ENSMUSG00000038174	family with sequence similarity 126, member B [Source:MGI Symbol;Acc:MGI:1098784]	29	2	64	1	64	6	1	0	1	17.8654	4.95036	1.68656	2.93517	0.0033336	0.10217	no	17.8654	4.55862	1.68731	2.70171	0.00689836	0.157317	no	17.8654	0.391742	1.59019	0.246348	0.805413	1	no
Ndufb3	1	58586384	ENSMUSG00000026032	NADH dehydrogenase (ubiquinone) 1 beta subcomplex 3 [Source:MGI Symbol;Acc:MGI:1913745]	2055	2043	2680	2850	1177	687	373	381	2267	1580.89	1.33836	1.03722	1.29033	0.196937	0.822467	no	1580.89	0.721102	1.03727	0.695193	0.486934	1	no	1580.89	0.617257	1.03717	0.595137	0.551752	1	no
Gm29389	1	58625214	ENSMUSG00000100202	predicted gene 29389 [Source:MGI Symbol;Acc:MGI:5580095]	0	0	1	0	0	0	3	0	0	0.307341	-0.447138	2.40139	-0.1862	0.852288	NA	no	0.307341	-1.1065	2.40139	-0.460775	0.64496	NA	no	0.307341	0.659364	2.40591	0.27406	0.784039	NA	no
Gm18802	1	58630375	ENSMUSG00000099490	predicted gene, 18802 [Source:MGI Symbol;Acc:MGI:5010987]	0	0	0	0	0	0	0	0	0	0	NA	NA	NA	NA	NA	no	0	NA	NA	NA	NA	NA	no	0	NA	NA	NA	NA	NA	no
Cbx3-ps7	1	58646688	ENSMUSG00000059647	chromobox 3, pseudogene 7 [Source:MGI Symbol;Acc:MGI:3704187]	0	0	0	0	0	0	0	0	0	0	NA	NA	NA	NA	NA	no	0	NA	NA	NA	NA	NA	no	0	NA	NA	NA	NA	NA	no
Als2cr12	1	58646903	ENSMUSG00000047528	amyotrophic lateral sclerosis 2 (juvenile) chromosome region, candidate 12 (human) [Source:MGI Symbol;Acc:MGI:1918359]	0	0	0	0	0	0	0	0	0	0	NA	NA	NA	NA	NA	no	0	NA	NA	NA	NA	NA	no	0	NA	NA	NA	NA	NA	no
Gm20257	1	58652641	ENSMUSG00000102059	predicted gene, 20257 [Source:MGI Symbol;Acc:MGI:5012442]	111	1	57	1	144	77	147	0	0	49.182	0.658785	1.92947	0.341432	0.732778	1	no	49.182	0.999985	1.92902	0.518389	0.604187	1	no	49.182	-0.3412	1.92884	-0.176894	0.859592	1	no
Gm28803	1	58702309	ENSMUSG00000101046	predicted gene 28803 [Source:MGI Symbol;Acc:MGI:5579509]	0	0	0	0	0	0	0	0	0	0	NA	NA	NA	NA	NA	no	0	NA	NA	NA	NA	NA	no	0	NA	NA	NA	NA	NA	no
Cflar	1	58711508	ENSMUSG00000026031	CASP8 and FADD-like apoptosis regulator [Source:MGI Symbol;Acc:MGI:1336166]	498	195	342	566	1122	619	1074	454	389	498.002	-0.364371	0.6443	-0.56553	0.571713	1	no	498.002	0.70039	0.643414	1.08855	0.276351	1	no	498.002	-1.06476	0.644102	-1.65309	0.0983118	0.708774	no
Gm3841	1	58785209	ENSMUSG00000100236	predicted gene 3841 [Source:MGI Symbol;Acc:MGI:3782013]	0	1	0	0	1	0	0	0	0	0.249715	0.863238	2.40591	0.358799	0.719746	NA	no	0.249715	0.770953	2.40591	0.320441	0.748634	NA	no	0.249715	0.0922849	2.40591	0.0383576	0.969403	NA	no
Casp8	1	58795374	ENSMUSG00000026029	caspase 8 [Source:MGI Symbol;Acc:MGI:1261423]	420	107	167	63	1	250	313	180	134	151.821	0.561704	1.23349	0.455377	0.648838	1	no	151.821	-0.634791	1.23456	-0.514186	0.607122	1	no	151.821	1.1965	1.2345	0.969212	0.33244	1	no
Gm37760	1	58797783	ENSMUSG00000102719	predicted gene, 37760 [Source:MGI Symbol;Acc:MGI:5610988]	0	0	2	1	0	1	0	134	3	10.854	-4.22425	2.12589	-1.98705	NA	NA	no	10.854	-4.32655	2.12393	-2.03704	NA	NA	no	10.854	0.102297	2.16558	0.047238	NA	NA	no
Gm28802	1	58850085	ENSMUSG00000099719	predicted gene 28802 [Source:MGI Symbol;Acc:MGI:5579508]	0	0	0	0	0	0	0	0	0	0	NA	NA	NA	NA	NA	no	0	NA	NA	NA	NA	NA	no	0	NA	NA	NA	NA	NA	no
Trak2	1	58900449	ENSMUSG00000026028	trafficking protein, kinesin binding 2 [Source:MGI Symbol;Acc:MGI:1918077]	154	0	53	423	0	48	307	52	0	94.8899	-0.178121	2.01187	-0.088535	0.929451	1	no	94.8899	0.853472	2.01133	0.424332	0.671323	1	no	94.8899	-1.03159	2.01168	-0.512801	0.60809	1	no
Stradb	1	58973522	ENSMUSG00000026027	STE20-related kinase adaptor beta [Source:MGI Symbol;Acc:MGI:2144047]	169	0	0	133	0	28	0	166	0	45.4825	0.219445	2.33698	0.0939013	0.925188	1	no	45.4825	0.28976	2.33692	0.123993	0.901321	1	no	45.4825	-0.0703146	2.33699	-0.0300877	0.975997	1	no
C2cd6b	1	58997123	ENSMUSG00000047383	C2 calcium dependent domain containing 6B [Source:MGI Symbol;Acc:MGI:5592748]	0	0	0	0	0	0	0	0	0	0	NA	NA	NA	NA	NA	no	0	NA	NA	NA	NA	NA	no	0	NA	NA	NA	NA	NA	no
Gm29018	1	59014224	ENSMUSG00000099752	predicted gene 29018 [Source:MGI Symbol;Acc:MGI:5579724]	0	0	0	0	0	0	0	0	0	0	NA	NA	NA	NA	NA	no	0	NA	NA	NA	NA	NA	no	0	NA	NA	NA	NA	NA	no
C2cd6	1	59050506	ENSMUSG00000072295	C2 calcium dependent domain containing 6 [Source:MGI Symbol;Acc:MGI:1920713]	0	0	0	0	0	0	0	0	0	0	NA	NA	NA	NA	NA	no	0	NA	NA	NA	NA	NA	no	0	NA	NA	NA	NA	NA	no
Gm25502	1	59070988	ENSMUSG00000077616	predicted gene, 25502 [Source:MGI Symbol;Acc:MGI:5455279]	0	0	0	0	0	0	0	0	0	0	NA	NA	NA	NA	NA	no	0	NA	NA	NA	NA	NA	no	0	NA	NA	NA	NA	NA	no
Tmem237	1	59100590	ENSMUSG00000038079	transmembrane protein 237 [Source:MGI Symbol;Acc:MGI:2138365]	0	0	0	0	0	0	0	0	0	0	NA	NA	NA	NA	NA	no	0	NA	NA	NA	NA	NA	no	0	NA	NA	NA	NA	NA	no
G730003C15Rik	1	59119833	ENSMUSG00000097573	RIKEN cDNA G730003C15 gene [Source:MGI Symbol;Acc:MGI:3641700]	0	0	0	0	0	0	0	0	0	0	NA	NA	NA	NA	NA	no	0	NA	NA	NA	NA	NA	no	0	NA	NA	NA	NA	NA	no
Mpp4	1	59120935	ENSMUSG00000079550	membrane protein, palmitoylated 4 (MAGUK p55 subfamily member 4) [Source:MGI Symbol;Acc:MGI:2386681]	0	0	0	0	0	0	0	0	0	0	NA	NA	NA	NA	NA	no	0	NA	NA	NA	NA	NA	no	0	NA	NA	NA	NA	NA	no
Gm29017	1	59151047	ENSMUSG00000101586	predicted gene 29017 [Source:MGI Symbol;Acc:MGI:5579723]	0	0	0	0	0	0	0	0	0	0	NA	NA	NA	NA	NA	no	0	NA	NA	NA	NA	NA	no	0	NA	NA	NA	NA	NA	no
Gm19125	1	59155607	ENSMUSG00000099563	predicted gene, 19125 [Source:MGI Symbol;Acc:MGI:5011310]	0	0	0	0	0	0	0	0	0	0	NA	NA	NA	NA	NA	no	0	NA	NA	NA	NA	NA	no	0	NA	NA	NA	NA	NA	no
Als2	1	59162926	ENSMUSG00000026024	amyotrophic lateral sclerosis 2 (juvenile) [Source:MGI Symbol;Acc:MGI:1921268]	0	0	1	7	0	0	0	0	0	0.875493	0.864559	2.40588	0.359353	0.719331	NA	no	0.875493	2.59602	2.39213	1.08523	0.277818	NA	no	0.875493	-1.73146	2.39209	-0.723828	0.469171	NA	no
Cdk15	1	59256906	ENSMUSG00000026023	cyclin-dependent kinase 15 [Source:MGI Symbol;Acc:MGI:3583944]	0	0	0	0	0	0	0	0	0	0	NA	NA	NA	NA	NA	no	0	NA	NA	NA	NA	NA	no	0	NA	NA	NA	NA	NA	no
Gm29016	1	59378930	ENSMUSG00000099922	predicted gene 29016 [Source:MGI Symbol;Acc:MGI:5579722]	0	0	0	0	0	0	0	0	0	0	NA	NA	NA	NA	NA	no	0	NA	NA	NA	NA	NA	no	0	NA	NA	NA	NA	NA	no
Gm37737	1	59447865	ENSMUSG00000104502	predicted gene, 37737 [Source:MGI Symbol;Acc:MGI:5610965]	0	0	0	0	0	0	0	0	0	0	NA	NA	NA	NA	NA	no	0	NA	NA	NA	NA	NA	no	0	NA	NA	NA	NA	NA	no
Fzd7	1	59482424	ENSMUSG00000041075	frizzled class receptor 7 [Source:MGI Symbol;Acc:MGI:108570]	0	0	0	0	0	0	0	0	0	0	NA	NA	NA	NA	NA	no	0	NA	NA	NA	NA	NA	no	0	NA	NA	NA	NA	NA	no
Gm26813	1	59488480	ENSMUSG00000097819	predicted gene, 26813 [Source:MGI Symbol;Acc:MGI:5477307]	0	0	0	0	0	0	0	0	0	0	NA	NA	NA	NA	NA	no	0	NA	NA	NA	NA	NA	no	0	NA	NA	NA	NA	NA	no
Gm973	1	59516264	ENSMUSG00000047361	predicted gene 973 [Source:MGI Symbol;Acc:MGI:2685819]	0	0	0	0	0	0	0	0	0	0	NA	NA	NA	NA	NA	no	0	NA	NA	NA	NA	NA	no	0	NA	NA	NA	NA	NA	no
Gm28411	1	59532991	ENSMUSG00000099811	predicted gene 28411 [Source:MGI Symbol;Acc:MGI:5579117]	0	0	0	0	0	0	0	0	0	0	NA	NA	NA	NA	NA	no	0	NA	NA	NA	NA	NA	no	0	NA	NA	NA	NA	NA	no
1700122D07Rik	1	59534811	ENSMUSG00000101409	RIKEN cDNA 1700122D07 gene [Source:MGI Symbol;Acc:MGI:1923911]	0	0	0	0	0	0	0	0	0	0	NA	NA	NA	NA	NA	no	0	NA	NA	NA	NA	NA	no	0	NA	NA	NA	NA	NA	no
Sumo1	1	59586558	ENSMUSG00000026021	small ubiquitin-like modifier 1 [Source:MGI Symbol;Acc:MGI:1197010]	1	135	420	0	4	187	23	510	76	132.198	0.394948	1.77027	0.2231	0.823457	1	no	132.198	-1.2071	1.7712	-0.681515	0.495546	1	no	132.198	1.60204	1.77123	0.904481	0.365741	1	no
Gm24545	1	59626580	ENSMUSG00000089276	predicted gene, 24545 [Source:MGI Symbol;Acc:MGI:5454322]	0	0	0	0	0	0	0	0	0	0	NA	NA	NA	NA	NA	no	0	NA	NA	NA	NA	NA	no	0	NA	NA	NA	NA	NA	no
D430013B06Rik	1	59646200	ENSMUSG00000103821	RIKEN cDNA D430013B06 gene [Source:MGI Symbol;Acc:MGI:3026994]	0	0	0	0	0	0	0	0	0	0	NA	NA	NA	NA	NA	no	0	NA	NA	NA	NA	NA	no	0	NA	NA	NA	NA	NA	no
Gm29596	1	59673241	ENSMUSG00000101400	predicted gene 29596 [Source:MGI Symbol;Acc:MGI:5580302]	0	0	0	0	0	0	0	0	0	0	NA	NA	NA	NA	NA	no	0	NA	NA	NA	NA	NA	no	0	NA	NA	NA	NA	NA	no
Nop58	1	59684971	ENSMUSG00000026020	NOP58 ribonucleoprotein [Source:MGI Symbol;Acc:MGI:1933184]	1350	579	381	632	454	664	758	1547	468	647.194	0.215503	0.705251	0.30557	0.759932	1	no	647.194	-0.26682	0.7054	-0.378253	0.705242	1	no	647.194	0.482323	0.705509	0.683653	0.494194	1	no
Snord70	1	59691934	ENSMUSG00000077345	small nucleolar RNA, C/D box 70 [Source:MGI Symbol;Acc:MGI:3819553]	0	0	0	0	0	0	0	0	0	0	NA	NA	NA	NA	NA	no	0	NA	NA	NA	NA	NA	no	0	NA	NA	NA	NA	NA	no
Gm26293	1	59692509	ENSMUSG00000077358	predicted gene, 26293 [Source:MGI Symbol;Acc:MGI:5456070]	0	0	0	0	0	0	0	0	0	0	NA	NA	NA	NA	NA	no	0	NA	NA	NA	NA	NA	no	0	NA	NA	NA	NA	NA	no
Gm26287	1	59704258	ENSMUSG00000089512	predicted gene, 26287 [Source:MGI Symbol;Acc:MGI:5456064]	0	0	0	0	0	0	0	0	0	0	NA	NA	NA	NA	NA	no	0	NA	NA	NA	NA	NA	no	0	NA	NA	NA	NA	NA	no
Snord11	1	59704790	ENSMUSG00000089093	small nucleolar RNA, C/D box 11 [Source:MGI Symbol;Acc:MGI:3819516]	0	0	0	0	0	0	0	0	0	0	NA	NA	NA	NA	NA	no	0	NA	NA	NA	NA	NA	no	0	NA	NA	NA	NA	NA	no
Bmpr2	1	59763400	ENSMUSG00000067336	bone morphogenetic protein receptor, type II (serine/threonine kinase) [Source:MGI Symbol;Acc:MGI:1095407]	1	0	99	0	69	39	21	1	41	28.0188	0.752562	1.93696	0.388527	0.697626	1	no	28.0188	0.734156	1.93673	0.379071	0.704635	1	no	28.0188	0.0184054	1.93627	0.0095056	0.992416	1	no
Gm38125	1	59801263	ENSMUSG00000104052	predicted gene, 38125 [Source:MGI Symbol;Acc:MGI:5611353]	0	0	0	0	0	0	0	0	0	0	NA	NA	NA	NA	NA	no	0	NA	NA	NA	NA	NA	no	0	NA	NA	NA	NA	NA	no
Gm37977	1	59886969	ENSMUSG00000103131	predicted gene, 37977 [Source:MGI Symbol;Acc:MGI:5611205]	0	0	0	0	0	0	0	0	0	0	NA	NA	NA	NA	NA	no	0	NA	NA	NA	NA	NA	no	0	NA	NA	NA	NA	NA	no
Fam117b	1	59913006	ENSMUSG00000041040	family with sequence similarity 117, member B [Source:MGI Symbol;Acc:MGI:1920000]	63	135	79	66	0	143	354	652	577	188.562	-1.82841	1.32033	-1.38481	0.16611	0.775664	no	188.562	-2.50088	1.32111	-1.89302	0.0583557	0.544801	no	188.562	0.672465	1.32261	0.508439	0.611145	1	no
Gm37531	1	59929688	ENSMUSG00000103696	predicted gene, 37531 [Source:MGI Symbol;Acc:MGI:5610759]	1	0	0	0	0	96	0	0	0	8.9774	0.909798	2.40225	0.378728	NA	NA	no	8.9774	5.17279	2.38431	2.16951	NA	NA	no	8.9774	-4.26299	2.38136	-1.79015	NA	NA	no
Gm18829	1	59950403	ENSMUSG00000100901	predicted gene, 18829 [Source:MGI Symbol;Acc:MGI:5011014]	0	0	0	0	0	0	0	0	0	0	NA	NA	NA	NA	NA	no	0	NA	NA	NA	NA	NA	no	0	NA	NA	NA	NA	NA	no
Ica1l	1	59982490	ENSMUSG00000026018	islet cell autoantigen 1-like [Source:MGI Symbol;Acc:MGI:1917625]	0	0	0	0	0	0	1	0	0	0.065138	-0.270919	2.40591	-0.112606	0.910343	NA	no	0.065138	-0.363204	2.40591	-0.150963	0.880005	NA	no	0.065138	0	2.40591	0	1	NA	no
Wdr12	1	60069785	ENSMUSG00000026019	WD repeat domain 12 [Source:MGI Symbol;Acc:MGI:1927241]	28	2	44	1	0	0	9	0	0	8.53349	3.02169	2.01276	1.50127	0.133285	NA	no	8.53349	-1.61233	2.08701	-0.772552	0.439788	1	no	8.53349	4.63402	2.07041	2.23821	0.0252071	0.346929	no
Carf	1	60098247	ENSMUSG00000026017	calcium response factor [Source:MGI Symbol;Acc:MGI:2182269]	0	1	0	0	1	45	0	1	47	9.53091	-3.24359	2.24253	-1.4464	NA	NA	no	9.53091	-0.194885	2.21881	-0.087833	NA	NA	no	9.53091	-3.0487	2.24338	-1.35898	NA	NA	no
Gm15464	1	60117255	ENSMUSG00000082609	predicted gene 15464 [Source:MGI Symbol;Acc:MGI:3646025]	169	105	110	205	364	50	4	131	63	126.037	1.27092	1.16008	1.09554	0.273279	0.896907	no	126.037	1.84816	1.15931	1.59418	0.110895	0.736533	no	126.037	-0.577235	1.15795	-0.498497	0.618134	1	no
Nbeal1	1	60180599	ENSMUSG00000073664	neurobeachin like 1 [Source:MGI Symbol;Acc:MGI:2444343]	11	2	74	0	166	0	2	0	44	32.2385	0.728374	2.10905	0.345356	NA	NA	no	32.2385	1.41086	2.10828	0.669198	NA	NA	no	32.2385	-0.682484	2.10797	-0.323763	NA	NA	no
Gm29332	1	60267402	ENSMUSG00000100516	predicted gene 29332 [Source:MGI Symbol;Acc:MGI:5580038]	0	0	0	0	0	0	0	0	0	0	NA	NA	NA	NA	NA	no	0	NA	NA	NA	NA	NA	no	0	NA	NA	NA	NA	NA	no
Cyp20a1	1	60343323	ENSMUSG00000049439	cytochrome P450, family 20, subfamily a, polypeptide 1 [Source:MGI Symbol;Acc:MGI:1925201]	11	91	52	57	0	122	5	1	0	37.7337	4.73258	1.66948	2.83477	0.00458591	0.125126	no	37.7337	4.57499	1.66945	2.74041	0.00613617	0.147709	no	37.7337	0.157591	1.62693	0.0968641	0.922834	1	no
6030460B20Rik	1	60353119	ENSMUSG00000103822	RIKEN cDNA 6030460B20 gene [Source:MGI Symbol;Acc:MGI:1924974]	0	0	0	0	0	0	0	0	0	0	NA	NA	NA	NA	NA	no	0	NA	NA	NA	NA	NA	no	0	NA	NA	NA	NA	NA	no
Abi2	1	60409619	ENSMUSG00000026782	abl-interactor 2 [Source:MGI Symbol;Acc:MGI:106913]	2	194	0	109	1	211	16	0	0	60.4084	3.47993	2.04761	1.69951	0.0892233	0.585408	no	60.4084	3.62603	2.04744	1.77101	0.0765596	0.626167	no	60.4084	-0.146099	2.04153	-0.0715638	0.942949	1	no
Raph1	1	60482292	ENSMUSG00000026014	Ras association (RalGDS/AF-6) and pleckstrin homology domains 1 [Source:MGI Symbol;Acc:MGI:1924550]	81	0	54	1	0	87	1	22	77	31.7912	0.367468	1.93447	0.189959	0.849342	1	no	31.7912	-0.230619	1.93512	-0.119175	0.905136	1	no	31.7912	0.598087	1.93528	0.309045	0.757288	1	no
Gm11575	1	60522839	ENSMUSG00000081562	predicted gene 11575 [Source:MGI Symbol;Acc:MGI:3649592]	0	0	0	0	2	0	0	0	0	0.214315	0	2.40591	0	1	NA	no	0.214315	1.3542	2.40551	0.562958	0.573464	NA	no	0.214315	-1.05804	2.40551	-0.439841	0.660052	NA	no
Gm11576	1	60537020	ENSMUSG00000084400	predicted gene 11576 [Source:MGI Symbol;Acc:MGI:3649593]	0	0	0	0	0	0	0	0	0	0	NA	NA	NA	NA	NA	no	0	NA	NA	NA	NA	NA	no	0	NA	NA	NA	NA	NA	no
Gm11578	1	60592251	ENSMUSG00000082160	predicted gene 11578 [Source:MGI Symbol;Acc:MGI:3650505]	0	0	0	0	0	0	0	0	0	0	NA	NA	NA	NA	NA	no	0	NA	NA	NA	NA	NA	no	0	NA	NA	NA	NA	NA	no
Gm38388	1	60594807	ENSMUSG00000103215	predicted gene, 38388 [Source:MGI Symbol;Acc:MGI:5613624]	0	0	0	0	0	0	0	0	0	0	NA	NA	NA	NA	NA	no	0	NA	NA	NA	NA	NA	no	0	NA	NA	NA	NA	NA	no
Gm23762	1	60613698	ENSMUSG00000088973	predicted gene, 23762 [Source:MGI Symbol;Acc:MGI:5453539]	0	0	0	0	0	0	0	0	0	0	NA	NA	NA	NA	NA	no	0	NA	NA	NA	NA	NA	no	0	NA	NA	NA	NA	NA	no
Gm11577	1	60700872	ENSMUSG00000084151	predicted gene 11577 [Source:MGI Symbol;Acc:MGI:3650975]	0	0	0	0	0	0	0	0	0	0	NA	NA	NA	NA	NA	no	0	NA	NA	NA	NA	NA	no	0	NA	NA	NA	NA	NA	no
Eif4a-ps4	1	60703932	ENSMUSG00000101188	eukaryotic translation initiation factor 4A, pseudogene 4 [Source:MGI Symbol;Acc:MGI:1195958]	0	0	0	0	0	0	0	60	0	4.52541	-4.13393	2.38554	-1.73291	NA	NA	no	4.52541	-4.22622	2.38554	-1.7716	NA	NA	no	4.52541	0	2.40591	0	NA	NA	no
Cd28	1	60716800	ENSMUSG00000026012	CD28 antigen [Source:MGI Symbol;Acc:MGI:88327]	779	489	640	513	945	857	316	1462	963	685.145	-0.123243	0.766436	-0.160801	0.87225	1	no	685.145	0.014438	0.766307	0.018841	0.984968	1	no	685.145	-0.137681	0.766537	-0.179615	0.857455	1	no
Gm11579	1	60776665	ENSMUSG00000086795	predicted gene 11579 [Source:MGI Symbol;Acc:MGI:3650510]	0	0	0	0	0	0	278	0	0	18.1084	-5.84923	2.38449	-2.45303	NA	NA	no	18.1084	-5.88647	2.38449	-2.46865	NA	NA	no	18.1084	0	2.40591	0	NA	NA	no
2310016D23Rik	1	60778843	ENSMUSG00000085965	RIKEN cDNA 2310016D23 gene [Source:MGI Symbol;Acc:MGI:1923693]	0	0	0	0	0	0	0	0	0	0	NA	NA	NA	NA	NA	no	0	NA	NA	NA	NA	NA	no	0	NA	NA	NA	NA	NA	no
Gm37198	1	60779352	ENSMUSG00000104069	predicted gene, 37198 [Source:MGI Symbol;Acc:MGI:5610426]	0	0	0	0	0	0	0	0	0	0	NA	NA	NA	NA	NA	no	0	NA	NA	NA	NA	NA	no	0	NA	NA	NA	NA	NA	no
Gm11609	1	60792490	ENSMUSG00000083118	predicted gene 11609 [Source:MGI Symbol;Acc:MGI:3694969]	0	0	0	0	0	0	0	0	0	0	NA	NA	NA	NA	NA	no	0	NA	NA	NA	NA	NA	no	0	NA	NA	NA	NA	NA	no
Gm11581	1	60809116	ENSMUSG00000083355	predicted gene 11581 [Source:MGI Symbol;Acc:MGI:3652083]	0	0	0	0	0	0	0	0	0	0	NA	NA	NA	NA	NA	no	0	NA	NA	NA	NA	NA	no	0	NA	NA	NA	NA	NA	no
Gm38137	1	60880338	ENSMUSG00000102549	predicted gene, 38137 [Source:MGI Symbol;Acc:MGI:5611365]	0	0	0	0	0	0	0	0	0	0	NA	NA	NA	NA	NA	no	0	NA	NA	NA	NA	NA	no	0	NA	NA	NA	NA	NA	no
Ctla4	1	60887000	ENSMUSG00000026011	cytotoxic T-lymphocyte-associated protein 4 [Source:MGI Symbol;Acc:MGI:88556]	379	363	660	145	125	465	549	70	32	277.91	1.77199	1.01923	1.73856	0.082112	0.565007	no	277.91	0.666343	1.0198	0.653406	0.513494	1	no	277.91	1.10565	1.0189	1.08514	0.277861	1	no
Rpl18-ps1	1	60900898	ENSMUSG00000081382	ribosomal protein L18, pseudogene 1 [Source:MGI Symbol;Acc:MGI:98018]	131	63	49	155	21	103	297	113	132	97.4795	-0.628361	0.893604	-0.703176	0.481946	0.990999	no	97.4795	-0.532243	0.892862	-0.596109	0.551103	1	no	97.4795	-0.0961178	0.89521	-0.107369	0.914496	1	no
Gm11582	1	60948230	ENSMUSG00000080800	predicted gene 11582 [Source:MGI Symbol;Acc:MGI:3652084]	0	0	0	0	0	0	0	0	0	0	NA	NA	NA	NA	NA	no	0	NA	NA	NA	NA	NA	no	0	NA	NA	NA	NA	NA	no
Icos	1	60977927	ENSMUSG00000026009	inducible T cell co-stimulator [Source:MGI Symbol;Acc:MGI:1858745]	558	68	534	270	456	876	271	1229	670	463.436	-0.557558	0.943522	-0.590933	0.554565	0.994378	no	463.436	-0.185519	0.943242	-0.196682	0.844076	1	no	463.436	-0.372039	0.943701	-0.394234	0.693408	1	no
Gm37039	1	60989479	ENSMUSG00000102561	predicted gene, 37039 [Source:MGI Symbol;Acc:MGI:5610267]	0	0	0	0	0	0	0	0	0	0	NA	NA	NA	NA	NA	no	0	NA	NA	NA	NA	NA	no	0	NA	NA	NA	NA	NA	no
Rpl17-ps1	1	61075674	ENSMUSG00000082804	ribosomal protein L17, pseudogene 1 [Source:MGI Symbol;Acc:MGI:3652107]	0	2	3	1	0	0	1	0	0	0.795115	1.82113	2.39291	0.761053	0.446626	NA	no	0.795115	0.233113	2.40472	0.0969396	0.922774	NA	no	0.795115	1.58802	2.39425	0.663264	0.507161	NA	no
Gm11590	1	61121378	ENSMUSG00000082661	predicted gene 11590 [Source:MGI Symbol;Acc:MGI:3652106]	0	0	0	0	0	0	0	0	0	0	NA	NA	NA	NA	NA	no	0	NA	NA	NA	NA	NA	no	0	NA	NA	NA	NA	NA	no
Gm11591	1	61196541	ENSMUSG00000080785	predicted gene 11591 [Source:MGI Symbol;Acc:MGI:3652105]	0	0	0	0	0	0	0	0	0	0	NA	NA	NA	NA	NA	no	0	NA	NA	NA	NA	NA	no	0	NA	NA	NA	NA	NA	no
Gm28083	1	61265291	ENSMUSG00000100893	predicted gene 28083 [Source:MGI Symbol;Acc:MGI:5578789]	0	0	0	0	0	0	0	0	0	0	NA	NA	NA	NA	NA	no	0	NA	NA	NA	NA	NA	no	0	NA	NA	NA	NA	NA	no
Gm11587	1	61301909	ENSMUSG00000085248	predicted gene 11587 [Source:MGI Symbol;Acc:MGI:3652110]	0	0	0	0	0	0	0	0	0	0	NA	NA	NA	NA	NA	no	0	NA	NA	NA	NA	NA	no	0	NA	NA	NA	NA	NA	no
9530026F06Rik	1	61378432	ENSMUSG00000085447	RIKEN cDNA 9530026F06 gene [Source:MGI Symbol;Acc:MGI:1924591]	0	0	0	0	0	0	0	0	0	0	NA	NA	NA	NA	NA	no	0	NA	NA	NA	NA	NA	no	0	NA	NA	NA	NA	NA	no
Gm11588	1	61440101	ENSMUSG00000086408	predicted gene 11588 [Source:MGI Symbol;Acc:MGI:3650951]	0	0	0	0	0	0	0	0	0	0	NA	NA	NA	NA	NA	no	0	NA	NA	NA	NA	NA	no	0	NA	NA	NA	NA	NA	no
Gm25839	1	61470441	ENSMUSG00000089546	predicted gene, 25839 [Source:MGI Symbol;Acc:MGI:5455616]	0	0	0	0	0	0	0	0	0	0	NA	NA	NA	NA	NA	no	0	NA	NA	NA	NA	NA	no	0	NA	NA	NA	NA	NA	no
Gm28449	1	61474951	ENSMUSG00000100965	predicted gene 28449 [Source:MGI Symbol;Acc:MGI:5579155]	0	0	0	0	0	0	0	0	0	0	NA	NA	NA	NA	NA	no	0	NA	NA	NA	NA	NA	no	0	NA	NA	NA	NA	NA	no
Gm36943	1	61545882	ENSMUSG00000102168	predicted gene, 36943 [Source:MGI Symbol;Acc:MGI:5610171]	0	0	0	0	0	0	0	0	0	0	NA	NA	NA	NA	NA	no	0	NA	NA	NA	NA	NA	no	0	NA	NA	NA	NA	NA	no
Gm28094	1	61548122	ENSMUSG00000100381	predicted gene 28094 [Source:MGI Symbol;Acc:MGI:5578800]	0	0	0	0	0	0	0	0	0	0	NA	NA	NA	NA	NA	no	0	NA	NA	NA	NA	NA	no	0	NA	NA	NA	NA	NA	no
4930587A21Rik	1	61616943	ENSMUSG00000086009	RIKEN cDNA 4930587A21 gene [Source:MGI Symbol;Acc:MGI:1923146]	0	0	0	0	0	0	0	0	0	0	NA	NA	NA	NA	NA	no	0	NA	NA	NA	NA	NA	no	0	NA	NA	NA	NA	NA	no
Pard3b	1	61638824	ENSMUSG00000052062	par-3 family cell polarity regulator beta [Source:MGI Symbol;Acc:MGI:1919301]	0	0	0	0	0	0	0	0	0	0	NA	NA	NA	NA	NA	no	0	NA	NA	NA	NA	NA	no	0	NA	NA	NA	NA	NA	no
Gm37205	1	61654423	ENSMUSG00000103656	predicted gene, 37205 [Source:MGI Symbol;Acc:MGI:5610433]	1	0	0	0	0	0	0	0	0	0.0938667	0.863238	2.40591	0.358799	0.719746	NA	no	0.0938667	0	2.40591	0	1	NA	no	0.0938667	0.659364	2.40591	0.27406	0.784039	NA	no
Gm38012	1	61677249	ENSMUSG00000104402	predicted gene, 38012 [Source:MGI Symbol;Acc:MGI:5611240]	0	0	0	0	0	0	0	0	0	0	NA	NA	NA	NA	NA	no	0	NA	NA	NA	NA	NA	no	0	NA	NA	NA	NA	NA	no
Gm38278	1	61702527	ENSMUSG00000104081	predicted gene, 38278 [Source:MGI Symbol;Acc:MGI:5611506]	0	0	0	0	0	0	0	0	0	0	NA	NA	NA	NA	NA	no	0	NA	NA	NA	NA	NA	no	0	NA	NA	NA	NA	NA	no
Pard3bos1	1	61767415	ENSMUSG00000085842	par-3 family cell polarity regulator beta, opposite strand 1 [Source:MGI Symbol;Acc:MGI:1921911]	0	0	0	0	0	0	0	0	0	0	NA	NA	NA	NA	NA	no	0	NA	NA	NA	NA	NA	no	0	NA	NA	NA	NA	NA	no
Gm38075	1	61805221	ENSMUSG00000103002	predicted gene, 38075 [Source:MGI Symbol;Acc:MGI:5611303]	0	0	0	0	0	0	0	0	0	0	NA	NA	NA	NA	NA	no	0	NA	NA	NA	NA	NA	no	0	NA	NA	NA	NA	NA	no
Gm29640	1	61980930	ENSMUSG00000100344	predicted gene 29640 [Source:MGI Symbol;Acc:MGI:5580346]	0	0	0	0	0	0	0	0	0	0	NA	NA	NA	NA	NA	no	0	NA	NA	NA	NA	NA	no	0	NA	NA	NA	NA	NA	no
Gm29641	1	62095081	ENSMUSG00000101509	predicted gene 29641 [Source:MGI Symbol;Acc:MGI:5580347]	0	0	0	0	0	0	0	0	0	0	NA	NA	NA	NA	NA	no	0	NA	NA	NA	NA	NA	no	0	NA	NA	NA	NA	NA	no
Pard3bos2	1	62131195	ENSMUSG00000085019	par-3 family cell polarity regulator beta, opposite strand 2 [Source:MGI Symbol;Acc:MGI:3650411]	0	0	0	0	0	0	0	0	0	0	NA	NA	NA	NA	NA	no	0	NA	NA	NA	NA	NA	no	0	NA	NA	NA	NA	NA	no
Gm38351	1	62247153	ENSMUSG00000102359	predicted gene, 38351 [Source:MGI Symbol;Acc:MGI:5611579]	0	0	0	0	0	0	0	0	0	0	NA	NA	NA	NA	NA	no	0	NA	NA	NA	NA	NA	no	0	NA	NA	NA	NA	NA	no
Pard3bos3	1	62456725	ENSMUSG00000085400	par-3 family cell polarity regulator beta, opposite strand 3 [Source:MGI Symbol;Acc:MGI:3651159]	0	0	0	0	0	0	0	0	0	0	NA	NA	NA	NA	NA	no	0	NA	NA	NA	NA	NA	no	0	NA	NA	NA	NA	NA	no
Gm29084	1	62534491	ENSMUSG00000100750	predicted gene 29084 [Source:MGI Symbol;Acc:MGI:5579790]	0	0	0	0	0	0	0	0	0	0	NA	NA	NA	NA	NA	no	0	NA	NA	NA	NA	NA	no	0	NA	NA	NA	NA	NA	no
Gm11600	1	62656695	ENSMUSG00000081950	predicted gene 11600 [Source:MGI Symbol;Acc:MGI:3651838]	0	0	0	0	0	0	0	0	0	0	NA	NA	NA	NA	NA	no	0	NA	NA	NA	NA	NA	no	0	NA	NA	NA	NA	NA	no
Gm11599	1	62660839	ENSMUSG00000084333	predicted gene 11599 [Source:MGI Symbol;Acc:MGI:3651840]	5	1	3	3	1	5	2	7	1	2.61026	0.277898	1.56595	0.177463	0.859145	NA	no	2.61026	0.198119	1.56306	0.126751	0.899138	NA	no	2.61026	0.079779	1.56981	0.0508207	0.959468	NA	no
Nrp2	1	62703285	ENSMUSG00000025969	neuropilin 2 [Source:MGI Symbol;Acc:MGI:1100492]	0	1	0	1	0	0	0	0	0	0.251639	0.863238	2.40591	0.358799	0.719746	NA	no	0.251639	0.770953	2.40591	0.320441	0.748634	NA	no	0.251639	0.0922849	2.40591	0.0383576	0.969403	NA	no
Gm29083	1	62714723	ENSMUSG00000100811	predicted gene 29083 [Source:MGI Symbol;Acc:MGI:5579789]	0	0	0	0	0	0	0	0	0	0	NA	NA	NA	NA	NA	no	0	NA	NA	NA	NA	NA	no	0	NA	NA	NA	NA	NA	no
Gm37121	1	62809302	ENSMUSG00000103032	predicted gene, 37121 [Source:MGI Symbol;Acc:MGI:5610349]	0	0	0	0	0	0	0	0	0	0	NA	NA	NA	NA	NA	no	0	NA	NA	NA	NA	NA	no	0	NA	NA	NA	NA	NA	no
Gm4208	1	62821355	ENSMUSG00000100426	predicted gene 4208 [Source:MGI Symbol;Acc:MGI:3782384]	0	0	0	0	0	0	0	0	0	0	NA	NA	NA	NA	NA	no	0	NA	NA	NA	NA	NA	no	0	NA	NA	NA	NA	NA	no
Ino80d	1	62958418	ENSMUSG00000040865	INO80 complex subunit D [Source:MGI Symbol;Acc:MGI:3027003]	557	196	0	185	144	59	265	719	322	227.327	-0.36526	1.4271	-0.255946	0.797992	1	no	227.327	-1.23897	1.42754	-0.867905	0.385446	1	no	227.327	0.87371	1.42786	0.611902	0.540603	1	no
Gm44468	1	63025742	ENSMUSG00000104991	predicted gene, 44468 [Source:MGI Symbol;Acc:MGI:5690860]	0	0	0	0	0	0	0	0	0	0	NA	NA	NA	NA	NA	no	0	NA	NA	NA	NA	NA	no	0	NA	NA	NA	NA	NA	no
Gm24942	1	63032706	ENSMUSG00000088953	predicted gene, 24942 [Source:MGI Symbol;Acc:MGI:5454719]	0	0	0	0	0	0	0	0	0	0	NA	NA	NA	NA	NA	no	0	NA	NA	NA	NA	NA	no	0	NA	NA	NA	NA	NA	no
Rps13-ps7	1	63038214	ENSMUSG00000081617	ribosomal protein S13, pseudogene 7 [Source:MGI Symbol;Acc:MGI:3650301]	4	1	1	4	5	0	2	1	3	2.12957	0.245273	1.81692	0.134994	0.892617	NA	no	2.12957	0.753131	1.79871	0.418707	0.67543	NA	no	2.12957	-0.507859	1.80643	-0.28114	0.778603	NA	no
Rps27-ps1	1	63073774	ENSMUSG00000081429	ribosomal protein S27, pseudogene 1 [Source:MGI Symbol;Acc:MGI:3652266]	3	4	0	1	1	0	0	1	1	1.25076	1.58815	2.2426	0.708171	0.478839	NA	no	1.25076	0.172888	2.26362	0.0763767	0.939119	NA	no	1.25076	1.41526	2.24628	0.630047	0.528664	NA	no
Ino80dos	1	63113078	ENSMUSG00000084799	INO80 complex subunit D, opposite strand [Source:MGI Symbol;Acc:MGI:3651861]	0	0	0	0	0	0	0	68	0	5.12879	-4.2622	2.38538	-1.7868	NA	NA	no	5.12879	-4.35448	2.38538	-1.82548	NA	NA	no	5.12879	0	2.40591	0	NA	NA	no
Gm20342	1	63117118	ENSMUSG00000101599	predicted gene, 20342 [Source:MGI Symbol;Acc:MGI:5012527]	94	183	32	11	192	69	286	261	0	104.967	0.00476123	1.51785	0.00313683	0.997497	1	no	104.967	-0.396714	1.51807	-0.261327	0.79384	1	no	104.967	0.401475	1.51845	0.264398	0.791473	1	no
Ndufs1	1	63143596	ENSMUSG00000025968	NADH dehydrogenase (ubiquinone) Fe-S protein 1 [Source:MGI Symbol;Acc:MGI:2443241]	25	7	63	102	112	160	555	131	86	103.587	-2.31058	0.96016	-2.40646	0.0161081	0.242838	no	103.587	-0.52256	0.952836	-0.548426	0.583399	1	no	103.587	-1.78802	0.961273	-1.86006	0.0628773	0.580394	no
Gm24557	1	63161855	ENSMUSG00000077884	predicted gene, 24557 [Source:MGI Symbol;Acc:MGI:5454334]	0	0	0	0	0	0	0	0	0	0	NA	NA	NA	NA	NA	no	0	NA	NA	NA	NA	NA	no	0	NA	NA	NA	NA	NA	no
Eef1b2	1	63176825	ENSMUSG00000025967	eukaryotic translation elongation factor 1 beta 2 [Source:MGI Symbol;Acc:MGI:1929520]	9865	7261	9552	13086	11980	9696	15569	12532	8981	9561.36	0.0516554	0.454332	0.113695	0.909479	1	no	9561.36	0.301396	0.45431	0.663414	0.507066	1	no	9561.36	-0.24974	0.454333	-0.549686	0.582535	1	no
Gm27390	1	63177983	ENSMUSG00000098850	predicted gene, 27390 [Source:MGI Symbol;Acc:MGI:5530772]	0	0	0	0	0	0	0	0	0	0	NA	NA	NA	NA	NA	no	0	NA	NA	NA	NA	NA	no	0	NA	NA	NA	NA	NA	no
Gm26457	1	63178677	ENSMUSG00000064612	predicted gene, 26457 [Source:MGI Symbol;Acc:MGI:5456234]	0	0	0	0	0	0	0	0	0	0	NA	NA	NA	NA	NA	no	0	NA	NA	NA	NA	NA	no	0	NA	NA	NA	NA	NA	no
Gm26457	1	63178686	ENSMUSG00000105060	predicted gene, 26457 [Source:MGI Symbol;Acc:MGI:5456234]	0	0	0	0	0	0	0	0	0	0	NA	NA	NA	NA	NA	no	0	NA	NA	NA	NA	NA	no	0	NA	NA	NA	NA	NA	no
Snora41	1	63179004	ENSMUSG00000064602	small nucleolar RNA, H/ACA box 41 [Source:MGI Symbol;Acc:MGI:3819505]	0	0	0	0	0	0	0	0	0	0	NA	NA	NA	NA	NA	no	0	NA	NA	NA	NA	NA	no	0	NA	NA	NA	NA	NA	no
Gpr1	1	63182691	ENSMUSG00000046856	G protein-coupled receptor 1 [Source:MGI Symbol;Acc:MGI:2385324]	0	0	0	0	0	0	0	0	0	0	NA	NA	NA	NA	NA	no	0	NA	NA	NA	NA	NA	no	0	NA	NA	NA	NA	NA	no
Gm27512	1	63198031	ENSMUSG00000094290	predicted gene, 27512 [Source:MGI Symbol;Acc:MGI:5530894]	0	0	0	0	0	0	0	0	0	0	NA	NA	NA	NA	NA	no	0	NA	NA	NA	NA	NA	no	0	NA	NA	NA	NA	NA	no
Platr12	1	63200313	ENSMUSG00000086730	pluripotency associated transcript 12 [Source:MGI Symbol;Acc:MGI:3651341]	0	0	0	0	0	0	0	0	0	0	NA	NA	NA	NA	NA	no	0	NA	NA	NA	NA	NA	no	0	NA	NA	NA	NA	NA	no
1700039I01Rik	1	63248021	ENSMUSG00000102536	RIKEN cDNA 1700039I01 gene [Source:MGI Symbol;Acc:MGI:1920596]	0	0	0	0	0	0	0	0	0	0	NA	NA	NA	NA	NA	no	0	NA	NA	NA	NA	NA	no	0	NA	NA	NA	NA	NA	no
Gm11608	1	63266848	ENSMUSG00000087561	predicted gene 11608 [Source:MGI Symbol;Acc:MGI:3651337]	0	0	0	0	0	0	0	0	0	0	NA	NA	NA	NA	NA	no	0	NA	NA	NA	NA	NA	no	0	NA	NA	NA	NA	NA	no
Gm24513	1	63273226	ENSMUSG00000092705	predicted gene, 24513 [Source:MGI Symbol;Acc:MGI:5454290]	0	0	0	0	0	0	0	0	0	0	NA	NA	NA	NA	NA	no	0	NA	NA	NA	NA	NA	no	0	NA	NA	NA	NA	NA	no
Zdbf2	1	63273265	ENSMUSG00000027520	zinc finger, DBF-type containing 2 [Source:MGI Symbol;Acc:MGI:1921134]	0	0	0	0	0	0	0	0	0	0	NA	NA	NA	NA	NA	no	0	NA	NA	NA	NA	NA	no	0	NA	NA	NA	NA	NA	no
Gm23448	1	63300280	ENSMUSG00000094214	predicted gene, 23448 [Source:MGI Symbol;Acc:MGI:5453225]	0	0	0	0	0	0	0	0	0	0	NA	NA	NA	NA	NA	no	0	NA	NA	NA	NA	NA	no	0	NA	NA	NA	NA	NA	no
Gm11606	1	63357434	ENSMUSG00000083039	predicted gene 11606 [Source:MGI Symbol;Acc:MGI:3649658]	0	0	0	0	0	0	0	0	0	0	NA	NA	NA	NA	NA	no	0	NA	NA	NA	NA	NA	no	0	NA	NA	NA	NA	NA	no
Gm11605	1	63364720	ENSMUSG00000081643	predicted gene 11605 [Source:MGI Symbol;Acc:MGI:3651339]	0	0	0	0	0	0	0	0	0	0	NA	NA	NA	NA	NA	no	0	NA	NA	NA	NA	NA	no	0	NA	NA	NA	NA	NA	no
Adam23	1	63445891	ENSMUSG00000025964	a disintegrin and metallopeptidase domain 23 [Source:MGI Symbol;Acc:MGI:1345162]	0	0	0	0	0	0	0	0	0	0	NA	NA	NA	NA	NA	no	0	NA	NA	NA	NA	NA	no	0	NA	NA	NA	NA	NA	no
Gm22281	1	63575488	ENSMUSG00000087823	predicted gene, 22281 [Source:MGI Symbol;Acc:MGI:5452058]	0	0	0	0	0	0	0	0	0	0	NA	NA	NA	NA	NA	no	0	NA	NA	NA	NA	NA	no	0	NA	NA	NA	NA	NA	no
Dytn	1	63622851	ENSMUSG00000069085	dystrotelin [Source:MGI Symbol;Acc:MGI:2685061]	0	0	0	0	0	0	0	0	0	0	NA	NA	NA	NA	NA	no	0	NA	NA	NA	NA	NA	no	0	NA	NA	NA	NA	NA	no
Gm12748	1	63671468	ENSMUSG00000083066	predicted gene 12748 [Source:MGI Symbol;Acc:MGI:3652128]	0	0	0	0	0	0	0	0	0	0	NA	NA	NA	NA	NA	no	0	NA	NA	NA	NA	NA	no	0	NA	NA	NA	NA	NA	no
Mdh1b	1	63698819	ENSMUSG00000025963	malate dehydrogenase 1B, NAD (soluble) [Source:MGI Symbol;Acc:MGI:1923918]	0	0	0	0	0	0	0	0	0	0	NA	NA	NA	NA	NA	no	0	NA	NA	NA	NA	NA	no	0	NA	NA	NA	NA	NA	no
Fastkd2	1	63730614	ENSMUSG00000025962	FAST kinase domains 2 [Source:MGI Symbol;Acc:MGI:1922869]	0	0	102	0	93	0	586	0	0	59.5531	-1.13069	2.35809	-0.479493	NA	NA	no	59.5531	-1.24675	2.35807	-0.528715	NA	NA	no	59.5531	0.116063	2.35835	0.0492135	NA	NA	no
4933402D24Rik	1	63754907	ENSMUSG00000025961	RIKEN cDNA 4933402D24 gene [Source:MGI Symbol;Acc:MGI:1921676]	0	0	0	0	0	0	0	0	0	0	NA	NA	NA	NA	NA	no	0	NA	NA	NA	NA	NA	no	0	NA	NA	NA	NA	NA	no
Gm13751	1	63844827	ENSMUSG00000080817	predicted gene 13751 [Source:MGI Symbol;Acc:MGI:3650600]	0	0	0	0	0	0	1	1	0	0.140561	-0.779887	2.40431	-0.32437	0.745658	NA	no	0.140561	-0.872172	2.40431	-0.362753	0.71679	NA	no	0.140561	0	2.40591	0	1	NA	no
Gm13754	1	63917848	ENSMUSG00000082373	predicted gene 13754 [Source:MGI Symbol;Acc:MGI:3651213]	0	0	0	0	0	0	0	0	0	0	NA	NA	NA	NA	NA	no	0	NA	NA	NA	NA	NA	no	0	NA	NA	NA	NA	NA	no
Gm13749	1	63964727	ENSMUSG00000044689	predicted gene 13749 [Source:MGI Symbol;Acc:MGI:3649721]	0	0	0	0	0	0	0	0	0	0	NA	NA	NA	NA	NA	no	0	NA	NA	NA	NA	NA	no	0	NA	NA	NA	NA	NA	no
Klf7	1	64029447	ENSMUSG00000025959	Kruppel-like factor 7 (ubiquitous) [Source:MGI Symbol;Acc:MGI:1935151]	138	90	180	56	161	82	341	410	235	155.223	-0.755232	0.677001	-1.11555	0.264613	0.893756	no	155.223	-1.31406	0.678098	-1.93786	0.0526403	0.512932	no	155.223	0.558827	0.680164	0.821607	0.411301	1	no
Gm26649	1	64029463	ENSMUSG00000097272	predicted gene, 26649 [Source:MGI Symbol;Acc:MGI:5477143]	0	0	0	0	0	0	0	0	0	0	NA	NA	NA	NA	NA	no	0	NA	NA	NA	NA	NA	no	0	NA	NA	NA	NA	NA	no
Mir6899	1	64042438	ENSMUSG00000098487	microRNA 6899 [Source:MGI Symbol;Acc:MGI:5530766]	0	0	0	0	0	0	0	0	0	0	NA	NA	NA	NA	NA	no	0	NA	NA	NA	NA	NA	no	0	NA	NA	NA	NA	NA	no
Gm13748	1	64078654	ENSMUSG00000086836	predicted gene 13748 [Source:MGI Symbol;Acc:MGI:3702115]	0	0	0	0	0	0	0	0	0	0	NA	NA	NA	NA	NA	no	0	NA	NA	NA	NA	NA	no	0	NA	NA	NA	NA	NA	no
Gm13750	1	64150201	ENSMUSG00000086721	predicted gene 13750 [Source:MGI Symbol;Acc:MGI:3650598]	0	0	1	0	0	0	0	0	0	0.111927	0.863238	2.40591	0.358799	0.719746	NA	no	0.111927	0	2.40591	0	1	NA	no	0.111927	0.659364	2.40591	0.27406	0.784039	NA	no
Gm28981	1	64185991	ENSMUSG00000101895	predicted gene 28981 [Source:MGI Symbol;Acc:MGI:5579687]	0	0	0	0	0	0	0	0	0	0	NA	NA	NA	NA	NA	no	0	NA	NA	NA	NA	NA	no	0	NA	NA	NA	NA	NA	no
Gm25748	1	64396334	ENSMUSG00000093228	predicted gene, 25748 [Source:MGI Symbol;Acc:MGI:5455525]	0	0	0	0	0	0	0	0	0	0	NA	NA	NA	NA	NA	no	0	NA	NA	NA	NA	NA	no	0	NA	NA	NA	NA	NA	no
Gm28980	1	64454359	ENSMUSG00000099658	predicted gene 28980 [Source:MGI Symbol;Acc:MGI:5579686]	0	0	0	0	0	0	0	0	0	0	NA	NA	NA	NA	NA	no	0	NA	NA	NA	NA	NA	no	0	NA	NA	NA	NA	NA	no
Creb1	1	64532645	ENSMUSG00000025958	cAMP responsive element binding protein 1 [Source:MGI Symbol;Acc:MGI:88494]	440	228	185	501	244	727	574	327	245	330.915	0.0956652	0.653167	0.146464	0.883555	1	no	330.915	0.731608	0.652388	1.12143	0.262104	1	no	330.915	-0.635943	0.652823	-0.974143	0.329985	1	no
Mettl21a	1	64606473	ENSMUSG00000025956	methyltransferase like 21A [Source:MGI Symbol;Acc:MGI:1914349]	105	41	0	40	31	0	1	176	13	38.1201	0.0758797	1.86676	0.0406477	0.967577	1	no	38.1201	-0.769917	1.86788	-0.412187	0.680202	1	no	38.1201	0.845797	1.86835	0.452696	0.650767	1	no
Gm28982	1	64617784	ENSMUSG00000101832	predicted gene 28982 [Source:MGI Symbol;Acc:MGI:5579688]	0	0	0	0	0	0	0	0	0	0	NA	NA	NA	NA	NA	no	0	NA	NA	NA	NA	NA	no	0	NA	NA	NA	NA	NA	no
Gm29152	1	64649935	ENSMUSG00000100437	predicted gene 29152 [Source:MGI Symbol;Acc:MGI:5579858]	0	0	0	0	0	0	0	0	0	0	NA	NA	NA	NA	NA	no	0	NA	NA	NA	NA	NA	no	0	NA	NA	NA	NA	NA	no
2810408I11Rik	1	64679871	ENSMUSG00000087213	RIKEN cDNA 2810408I11 gene [Source:MGI Symbol;Acc:MGI:1917191]	0	0	0	1	0	0	0	0	0	0.109081	0	2.40591	0	1	NA	no	0.109081	0.770953	2.40591	0.320441	0.748634	NA	no	0.109081	-0.474794	2.40591	-0.197345	0.843558	NA	no
Ccnyl1	1	64690455	ENSMUSG00000070871	cyclin Y-like 1 [Source:MGI Symbol;Acc:MGI:2138614]	0	0	0	0	0	0	0	0	0	0	NA	NA	NA	NA	NA	no	0	NA	NA	NA	NA	NA	no	0	NA	NA	NA	NA	NA	no
Fzd5	1	64730558	ENSMUSG00000045005	frizzled class receptor 5 [Source:MGI Symbol;Acc:MGI:108571]	0	0	0	0	0	0	0	0	0	0	NA	NA	NA	NA	NA	no	0	NA	NA	NA	NA	NA	no	0	NA	NA	NA	NA	NA	no
Gm38058	1	64736240	ENSMUSG00000102140	predicted gene, 38058 [Source:MGI Symbol;Acc:MGI:5611286]	0	0	0	0	0	0	0	0	0	0	NA	NA	NA	NA	NA	no	0	NA	NA	NA	NA	NA	no	0	NA	NA	NA	NA	NA	no
Plekhm3	1	64785983	ENSMUSG00000051344	pleckstrin homology domain containing, family M, member 3 [Source:MGI Symbol;Acc:MGI:2443627]	0	0	0	0	0	28	0	0	0	2.59103	0	2.40591	0	NA	NA	no	2.59103	3.87876	2.38711	1.62488	NA	NA	no	2.59103	-3.5826	2.38711	-1.50081	NA	NA	no
Rpl31-ps24	1	64934402	ENSMUSG00000097264	ribosomal protein L31, pseudogene 24 [Source:MGI Symbol;Acc:MGI:3648658]	0	0	1	1	1	0	0	1	0	0.403589	0.2794	2.4055	0.116151	0.907533	NA	no	0.403589	0.771955	2.40293	0.321256	0.748017	NA	no	0.403589	-0.492555	2.40336	-0.204945	0.837615	NA	no
Rpl10a-ps1	1	64993951	ENSMUSG00000084416	ribosomal protein L10A, pseudogene 1 [Source:MGI Symbol;Acc:MGI:3705885]	124	182	69	42	102	87	116	41	139	94.4288	0.798955	0.88538	0.902387	0.366851	0.964688	no	94.4288	-0.110913	0.887147	-0.125022	0.900506	1	no	94.4288	0.909868	0.886518	1.02634	0.304732	1	no
Gm24788	1	65001307	ENSMUSG00000077471	predicted gene, 24788 [Source:MGI Symbol;Acc:MGI:5454565]	0	0	0	0	0	0	0	0	0	0	NA	NA	NA	NA	NA	no	0	NA	NA	NA	NA	NA	no	0	NA	NA	NA	NA	NA	no
Akr1cl	1	65012689	ENSMUSG00000025955	aldo-keto reductase family 1, member C-like [Source:MGI Symbol;Acc:MGI:1918111]	0	0	0	0	0	0	0	0	0	0	NA	NA	NA	NA	NA	no	0	NA	NA	NA	NA	NA	no	0	NA	NA	NA	NA	NA	no
Gm8550	1	65028080	ENSMUSG00000090042	predicted gene 8550 [Source:MGI Symbol;Acc:MGI:3779803]	0	0	0	0	0	0	0	0	0	0	NA	NA	NA	NA	NA	no	0	NA	NA	NA	NA	NA	no	0	NA	NA	NA	NA	NA	no
Cryge	1	65048554	ENSMUSG00000070870	crystallin, gamma E [Source:MGI Symbol;Acc:MGI:88525]	0	0	0	0	0	0	0	0	0	0	NA	NA	NA	NA	NA	no	0	NA	NA	NA	NA	NA	no	0	NA	NA	NA	NA	NA	no
Crygd	1	65061872	ENSMUSG00000067299	crystallin, gamma D [Source:MGI Symbol;Acc:MGI:88524]	0	0	0	0	0	0	0	0	0	0	NA	NA	NA	NA	NA	no	0	NA	NA	NA	NA	NA	no	0	NA	NA	NA	NA	NA	no
Crygc	1	65071525	ENSMUSG00000025952	crystallin, gamma C [Source:MGI Symbol;Acc:MGI:88523]	0	0	0	0	0	0	0	0	0	0	NA	NA	NA	NA	NA	no	0	NA	NA	NA	NA	NA	no	0	NA	NA	NA	NA	NA	no
Crygb	1	65080219	ENSMUSG00000073658	crystallin, gamma B [Source:MGI Symbol;Acc:MGI:88522]	0	0	0	0	0	0	0	0	0	0	NA	NA	NA	NA	NA	no	0	NA	NA	NA	NA	NA	no	0	NA	NA	NA	NA	NA	no
Gm7329	1	65095227	ENSMUSG00000100774	predicted gene 7329 [Source:MGI Symbol;Acc:MGI:3646271]	0	0	0	0	0	0	0	0	0	0	NA	NA	NA	NA	NA	no	0	NA	NA	NA	NA	NA	no	0	NA	NA	NA	NA	NA	no
Cryga	1	65100389	ENSMUSG00000044429	crystallin, gamma A [Source:MGI Symbol;Acc:MGI:88521]	0	0	0	0	0	0	0	0	0	0	NA	NA	NA	NA	NA	no	0	NA	NA	NA	NA	NA	no	0	NA	NA	NA	NA	NA	no
Gm28845	1	65100619	ENSMUSG00000100846	predicted gene 28845 [Source:MGI Symbol;Acc:MGI:5579551]	0	0	0	0	0	0	0	0	0	0	NA	NA	NA	NA	NA	no	0	NA	NA	NA	NA	NA	no	0	NA	NA	NA	NA	NA	no
D630023F18Rik	1	65105285	ENSMUSG00000044816	RIKEN cDNA D630023F18 gene [Source:MGI Symbol;Acc:MGI:2138198]	0	0	0	0	0	0	0	0	0	0	NA	NA	NA	NA	NA	no	0	NA	NA	NA	NA	NA	no	0	NA	NA	NA	NA	NA	no
Idh1	1	65158616	ENSMUSG00000025950	isocitrate dehydrogenase 1 (NADP+), soluble [Source:MGI Symbol;Acc:MGI:96413]	0	0	1	59	1	97	4	110	337	60.3375	-6.91734	1.74797	-3.95737	7.57799e-05	0.0102387	yes	60.3375	-1.36394	1.62168	-0.841068	0.40031	1	no	60.3375	-5.5534	1.74959	-3.17411	0.00150296	0.0793431	no
Pikfyve	1	65186683	ENSMUSG00000025949	phosphoinositide kinase, FYVE type zinc finger containing [Source:MGI Symbol;Acc:MGI:1335106]	3	137	100	134	114	2	175	2	69	76.9741	0.629034	1.54533	0.407056	0.683967	1	no	76.9741	0.453009	1.54533	0.293147	0.76941	1	no	76.9741	0.176025	1.54517	0.113919	0.909302	1	no
Pth2r	1	65282056	ENSMUSG00000025946	parathyroid hormone 2 receptor [Source:MGI Symbol;Acc:MGI:2180917]	0	0	0	0	0	0	0	0	0	0	NA	NA	NA	NA	NA	no	0	NA	NA	NA	NA	NA	no	0	NA	NA	NA	NA	NA	no
Gm28927	1	65420850	ENSMUSG00000100503	predicted gene 28927 [Source:MGI Symbol;Acc:MGI:5579633]	0	0	0	0	0	0	0	0	0	0	NA	NA	NA	NA	NA	no	0	NA	NA	NA	NA	NA	no	0	NA	NA	NA	NA	NA	no
Gm28926	1	65421124	ENSMUSG00000100504	predicted gene 28926 [Source:MGI Symbol;Acc:MGI:5579632]	0	0	0	0	0	0	0	0	0	0	NA	NA	NA	NA	NA	no	0	NA	NA	NA	NA	NA	no	0	NA	NA	NA	NA	NA	no
Gm28925	1	65421770	ENSMUSG00000099383	predicted gene 28925 [Source:MGI Symbol;Acc:MGI:5579631]	0	0	0	0	0	0	0	0	0	0	NA	NA	NA	NA	NA	no	0	NA	NA	NA	NA	NA	no	0	NA	NA	NA	NA	NA	no
Gm28923	1	65438664	ENSMUSG00000100340	predicted gene 28923 [Source:MGI Symbol;Acc:MGI:5579629]	0	0	0	0	0	0	0	0	0	0	NA	NA	NA	NA	NA	no	0	NA	NA	NA	NA	NA	no	0	NA	NA	NA	NA	NA	no
Gm28922	1	65470201	ENSMUSG00000100439	predicted gene 28922 [Source:MGI Symbol;Acc:MGI:5579628]	0	0	0	0	0	0	0	0	0	0	NA	NA	NA	NA	NA	no	0	NA	NA	NA	NA	NA	no	0	NA	NA	NA	NA	NA	no
Gm28728	1	65523671	ENSMUSG00000099819	predicted gene 28728 [Source:MGI Symbol;Acc:MGI:5579434]	0	0	0	0	0	0	0	0	0	0	NA	NA	NA	NA	NA	no	0	NA	NA	NA	NA	NA	no	0	NA	NA	NA	NA	NA	no
Gm5255	1	65550464	ENSMUSG00000082565	predicted gene 5255 [Source:MGI Symbol;Acc:MGI:3779482]	0	0	0	0	0	0	0	0	0	0	NA	NA	NA	NA	NA	no	0	NA	NA	NA	NA	NA	no	0	NA	NA	NA	NA	NA	no
Gm8805	1	65552682	ENSMUSG00000082774	predicted gene 8805 [Source:MGI Symbol;Acc:MGI:3643512]	3	6	5	8	4	8	15	13	11	6.87568	-0.85494	1.11557	-0.76637	0.443456	NA	no	6.87568	-0.584886	1.10235	-0.53058	0.59571	NA	no	6.87568	-0.270054	1.13277	-0.238401	0.81157	NA	no
Crygf	1	65926520	ENSMUSG00000025945	crystallin, gamma F [Source:MGI Symbol;Acc:MGI:88526]	0	0	0	0	0	0	0	0	0	0	NA	NA	NA	NA	NA	no	0	NA	NA	NA	NA	NA	no	0	NA	NA	NA	NA	NA	no
Gm8809	1	66032183	ENSMUSG00000081623	predicted gene 8809 [Source:MGI Symbol;Acc:MGI:3645410]	0	0	0	0	0	0	0	0	0	0	NA	NA	NA	NA	NA	no	0	NA	NA	NA	NA	NA	no	0	NA	NA	NA	NA	NA	no
Gm15659	1	66033085	ENSMUSG00000083242	predicted gene 15659 [Source:MGI Symbol;Acc:MGI:3801822]	0	0	0	0	0	0	0	0	0	0	NA	NA	NA	NA	NA	no	0	NA	NA	NA	NA	NA	no	0	NA	NA	NA	NA	NA	no
Gm8812	1	66062965	ENSMUSG00000083289	predicted gene 8812 [Source:MGI Symbol;Acc:MGI:3643091]	0	0	0	0	0	0	0	0	0	0	NA	NA	NA	NA	NA	no	0	NA	NA	NA	NA	NA	no	0	NA	NA	NA	NA	NA	no
Map2	1	66175273	ENSMUSG00000015222	microtubule-associated protein 2 [Source:MGI Symbol;Acc:MGI:97175]	2	2	35	4	2	92	14	2	39	18.8006	-0.217644	1.62486	-0.133946	0.893445	1	no	18.8006	0.711846	1.61989	0.439442	0.660342	1	no	18.8006	-0.92949	1.6235	-0.572521	0.566969	1	no
Gm24729	1	66305889	ENSMUSG00000088850	predicted gene, 24729 [Source:MGI Symbol;Acc:MGI:5454506]	0	0	0	0	0	0	0	0	0	0	NA	NA	NA	NA	NA	no	0	NA	NA	NA	NA	NA	no	0	NA	NA	NA	NA	NA	no
Gm10558	1	66322276	ENSMUSG00000073656	predicted gene 10558 [Source:MGI Symbol;Acc:MGI:3642906]	0	0	0	0	0	0	0	0	0	0	NA	NA	NA	NA	NA	no	0	NA	NA	NA	NA	NA	no	0	NA	NA	NA	NA	NA	no
Gm25411	1	66436082	ENSMUSG00000065694	predicted gene, 25411 [Source:MGI Symbol;Acc:MGI:5455188]	0	0	0	0	0	0	0	0	0	0	NA	NA	NA	NA	NA	no	0	NA	NA	NA	NA	NA	no	0	NA	NA	NA	NA	NA	no
Unc80	1	66468367	ENSMUSG00000055567	unc-80, NALCN activator [Source:MGI Symbol;Acc:MGI:2652882]	1	1	0	0	0	0	2	1	0	0.442124	0.0684191	2.39738	0.0285391	0.977232	NA	no	0.442124	-1.13141	2.39984	-0.471455	0.637316	NA	no	0.442124	1.19983	2.40361	0.49918	0.617653	NA	no
Gm37181	1	66690630	ENSMUSG00000103375	predicted gene, 37181 [Source:MGI Symbol;Acc:MGI:5610409]	0	0	0	0	0	0	0	0	0	0	NA	NA	NA	NA	NA	no	0	NA	NA	NA	NA	NA	no	0	NA	NA	NA	NA	NA	no
Rpe	1	66700831	ENSMUSG00000026005	ribulose-5-phosphate-3-epimerase [Source:MGI Symbol;Acc:MGI:1913896]	1	24	1	33	42	90	28	0	186	41.8315	-2.21598	1.69985	-1.30363	0.192359	0.814541	no	41.8315	-0.351956	1.69315	-0.207871	0.835329	1	no	41.8315	-1.86402	1.70065	-1.09606	0.273051	1	no
Kansl1l	1	66719248	ENSMUSG00000026004	KAT8 regulatory NSL complex subunit 1-like [Source:MGI Symbol;Acc:MGI:1915941]	0	0	47	0	0	0	0	2	0	5.41142	3.40907	2.37411	1.43594	NA	NA	no	5.41142	-0.890808	2.39619	-0.371761	NA	NA	no	5.41142	4.29988	2.38574	1.80232	NA	NA	no
Gm37570	1	66765626	ENSMUSG00000102559	predicted gene, 37570 [Source:MGI Symbol;Acc:MGI:5610798]	0	0	0	0	0	0	0	0	0	0	NA	NA	NA	NA	NA	no	0	NA	NA	NA	NA	NA	no	0	NA	NA	NA	NA	NA	no
Gm38387	1	66769290	ENSMUSG00000102374	predicted gene, 38387 [Source:MGI Symbol;Acc:MGI:5613622]	0	0	0	0	0	0	0	0	0	0	NA	NA	NA	NA	NA	no	0	NA	NA	NA	NA	NA	no	0	NA	NA	NA	NA	NA	no
Gm38162	1	66775511	ENSMUSG00000102776	predicted gene, 38162 [Source:MGI Symbol;Acc:MGI:5611390]	0	0	0	0	0	0	0	0	0	0	NA	NA	NA	NA	NA	no	0	NA	NA	NA	NA	NA	no	0	NA	NA	NA	NA	NA	no
Gm15789	1	66783913	ENSMUSG00000082057	predicted gene 15789 [Source:MGI Symbol;Acc:MGI:3783231]	0	0	0	0	0	0	0	0	0	0	NA	NA	NA	NA	NA	no	0	NA	NA	NA	NA	NA	no	0	NA	NA	NA	NA	NA	no
6820402A03Rik	1	66793645	ENSMUSG00000103706	RIKEN cDNA 6820402A03 gene [Source:MGI Symbol;Acc:MGI:1922992]	0	0	0	0	0	0	0	200	0	15.0847	-5.73232	2.38457	-2.40392	NA	NA	no	15.0847	-5.77093	2.38457	-2.42011	NA	NA	no	15.0847	0	2.40591	0	NA	NA	no
Gm37285	1	66799659	ENSMUSG00000103756	predicted gene, 37285 [Source:MGI Symbol;Acc:MGI:5610513]	0	0	0	0	0	0	0	0	0	0	NA	NA	NA	NA	NA	no	0	NA	NA	NA	NA	NA	no	0	NA	NA	NA	NA	NA	no
Gm37755	1	66812315	ENSMUSG00000103382	predicted gene, 37755 [Source:MGI Symbol;Acc:MGI:5610983]	0	0	0	0	0	0	0	0	0	0	NA	NA	NA	NA	NA	no	0	NA	NA	NA	NA	NA	no	0	NA	NA	NA	NA	NA	no
Gm38218	1	66821226	ENSMUSG00000103553	predicted gene, 38218 [Source:MGI Symbol;Acc:MGI:5611446]	0	0	0	0	0	0	0	0	0	0	NA	NA	NA	NA	NA	no	0	NA	NA	NA	NA	NA	no	0	NA	NA	NA	NA	NA	no
Acadl	1	66830839	ENSMUSG00000026003	acyl-Coenzyme A dehydrogenase, long-chain [Source:MGI Symbol;Acc:MGI:87866]	171	310	121	5	73	226	1	21	102	115.659	2.31421	1.42656	1.62223	0.104755	0.63691	no	115.659	1.10201	1.42744	0.772022	0.440102	1	no	115.659	1.21219	1.42533	0.850465	0.395066	1	no
Gm15793	1	66849108	ENSMUSG00000082769	predicted gene 15793 [Source:MGI Symbol;Acc:MGI:3783235]	8	2	3	3	3	6	19	3	1	4.14693	-0.183669	1.44929	-0.12673	0.899154	NA	no	4.14693	-0.361176	1.44951	-0.24917	0.803229	NA	no	4.14693	0.177507	1.4641	0.121239	0.903502	NA	no
Gm27934	1	66856641	ENSMUSG00000089420	predicted gene, 27934 [Source:MGI Symbol;Acc:MGI:5531316]	0	0	0	0	0	0	0	0	0	0	NA	NA	NA	NA	NA	no	0	NA	NA	NA	NA	NA	no	0	NA	NA	NA	NA	NA	no
Gm25832	1	66866797	ENSMUSG00000077328	predicted gene, 25832 [Source:MGI Symbol;Acc:MGI:5455609]	0	0	0	0	0	0	0	0	0	0	NA	NA	NA	NA	NA	no	0	NA	NA	NA	NA	NA	no	0	NA	NA	NA	NA	NA	no
Myl1	1	66924295	ENSMUSG00000061816	myosin, light polypeptide 1 [Source:MGI Symbol;Acc:MGI:97269]	0	0	0	1	0	0	0	0	0	0.109081	0	2.40591	0	1	NA	no	0.109081	0.770953	2.40591	0.320441	0.748634	NA	no	0.109081	-0.474794	2.40591	-0.197345	0.843558	NA	no
Rpl31-ps14	1	66948563	ENSMUSG00000094191	ribosomal protein L31, pseudogene 14 [Source:MGI Symbol;Acc:MGI:3704189]	0	1	29	10	2	0	0	5	21	7.32332	0.284352	2.11212	0.134629	0.892905	NA	no	7.32332	-0.744577	2.11637	-0.351818	0.724975	NA	no	7.32332	1.02893	2.11707	0.486016	0.626956	NA	no
Gm15826	1	66951829	ENSMUSG00000082212	predicted gene 15826 [Source:MGI Symbol;Acc:MGI:3801881]	0	0	0	0	0	0	0	0	0	0	NA	NA	NA	NA	NA	no	0	NA	NA	NA	NA	NA	no	0	NA	NA	NA	NA	NA	no
Lancl1	1	67000517	ENSMUSG00000026000	LanC (bacterial lantibiotic synthetase component C)-like 1 [Source:MGI Symbol;Acc:MGI:1336997]	34	1	0	116	0	144	67	163	18	47.9018	-2.06889	1.76211	-1.1741	0.240355	0.869855	no	47.9018	0.414686	1.75517	0.236266	0.813226	1	no	47.9018	-2.48358	1.76201	-1.40951	0.158685	0.869818	no
Cps1	1	67123026	ENSMUSG00000025991	carbamoyl-phosphate synthetase 1 [Source:MGI Symbol;Acc:MGI:891996]	0	0	0	0	0	0	0	0	0	0	NA	NA	NA	NA	NA	no	0	NA	NA	NA	NA	NA	no	0	NA	NA	NA	NA	NA	no
Gm15668	1	67249200	ENSMUSG00000086204	predicted gene 15668 [Source:MGI Symbol;Acc:MGI:3783110]	0	0	0	0	0	0	0	0	0	0	NA	NA	NA	NA	NA	no	0	NA	NA	NA	NA	NA	no	0	NA	NA	NA	NA	NA	no
Gm26342	1	67257224	ENSMUSG00000077745	predicted gene, 26342 [Source:MGI Symbol;Acc:MGI:5456119]	0	0	0	0	0	0	0	0	0	0	NA	NA	NA	NA	NA	no	0	NA	NA	NA	NA	NA	no	0	NA	NA	NA	NA	NA	no
Kif22-ps	1	67585053	ENSMUSG00000082473	kinesin family member 22, pseudogene [Source:MGI Symbol;Acc:MGI:109206]	0	0	0	0	0	0	0	0	0	0	NA	NA	NA	NA	NA	no	0	NA	NA	NA	NA	NA	no	0	NA	NA	NA	NA	NA	no
Gm22548	1	67616975	ENSMUSG00000095282	predicted gene, 22548 [Source:MGI Symbol;Acc:MGI:5452325]	0	0	0	0	0	0	0	0	0	0	NA	NA	NA	NA	NA	no	0	NA	NA	NA	NA	NA	no	0	NA	NA	NA	NA	NA	no
Gm15669	1	67792481	ENSMUSG00000085075	predicted gene 15669 [Source:MGI Symbol;Acc:MGI:3783111]	0	0	0	0	0	0	0	0	0	0	NA	NA	NA	NA	NA	no	0	NA	NA	NA	NA	NA	no	0	NA	NA	NA	NA	NA	no
Gm37957	1	67903230	ENSMUSG00000104395	predicted gene, 37957 [Source:MGI Symbol;Acc:MGI:5611185]	0	0	0	0	0	0	0	0	0	0	NA	NA	NA	NA	NA	no	0	NA	NA	NA	NA	NA	no	0	NA	NA	NA	NA	NA	no
Gm23189	1	67973676	ENSMUSG00000096031	predicted gene, 23189 [Source:MGI Symbol;Acc:MGI:5452966]	0	0	0	0	0	0	0	0	0	0	NA	NA	NA	NA	NA	no	0	NA	NA	NA	NA	NA	no	0	NA	NA	NA	NA	NA	no
Gm15671	1	68024243	ENSMUSG00000087329	predicted gene 15671 [Source:MGI Symbol;Acc:MGI:3783113]	0	0	0	0	0	0	0	0	0	0	NA	NA	NA	NA	NA	no	0	NA	NA	NA	NA	NA	no	0	NA	NA	NA	NA	NA	no
Erbb4	1	68032186	ENSMUSG00000062209	erb-b2 receptor tyrosine kinase 4 [Source:MGI Symbol;Acc:MGI:104771]	0	0	0	0	0	0	0	0	0	0	NA	NA	NA	NA	NA	no	0	NA	NA	NA	NA	NA	no	0	NA	NA	NA	NA	NA	no
Gm37100	1	68115195	ENSMUSG00000102449	predicted gene, 37100 [Source:MGI Symbol;Acc:MGI:5610328]	0	0	0	0	0	0	0	0	0	0	NA	NA	NA	NA	NA	no	0	NA	NA	NA	NA	NA	no	0	NA	NA	NA	NA	NA	no
Gm15670	1	68293280	ENSMUSG00000083795	predicted gene 15670 [Source:MGI Symbol;Acc:MGI:3783112]	0	0	0	0	0	0	0	0	0	0	NA	NA	NA	NA	NA	no	0	NA	NA	NA	NA	NA	no	0	NA	NA	NA	NA	NA	no
Gm25542	1	68384942	ENSMUSG00000080539	predicted gene, 25542 [Source:MGI Symbol;Acc:MGI:5455319]	0	0	0	0	0	0	0	0	0	0	NA	NA	NA	NA	NA	no	0	NA	NA	NA	NA	NA	no	0	NA	NA	NA	NA	NA	no
Gm19335	1	68591618	ENSMUSG00000103307	predicted gene, 19335 [Source:MGI Symbol;Acc:MGI:5011520]	0	0	0	0	0	0	0	0	0	0	NA	NA	NA	NA	NA	no	0	NA	NA	NA	NA	NA	no	0	NA	NA	NA	NA	NA	no
Gm37735	1	68639424	ENSMUSG00000104508	predicted gene, 37735 [Source:MGI Symbol;Acc:MGI:5610963]	0	0	0	0	0	0	0	0	0	0	NA	NA	NA	NA	NA	no	0	NA	NA	NA	NA	NA	no	0	NA	NA	NA	NA	NA	no
Gm37769	1	68711037	ENSMUSG00000103642	predicted gene, 37769 [Source:MGI Symbol;Acc:MGI:5610997]	0	0	0	0	0	0	0	0	0	0	NA	NA	NA	NA	NA	no	0	NA	NA	NA	NA	NA	no	0	NA	NA	NA	NA	NA	no
Gm37061	1	68758485	ENSMUSG00000103809	predicted gene, 37061 [Source:MGI Symbol;Acc:MGI:5610289]	0	0	0	0	0	0	0	0	0	0	NA	NA	NA	NA	NA	no	0	NA	NA	NA	NA	NA	no	0	NA	NA	NA	NA	NA	no
Gm16076	1	69091913	ENSMUSG00000087514	predicted gene 16076 [Source:MGI Symbol;Acc:MGI:3802084]	0	0	0	0	0	0	0	0	0	0	NA	NA	NA	NA	NA	no	0	NA	NA	NA	NA	NA	no	0	NA	NA	NA	NA	NA	no
Gm8840	1	69130914	ENSMUSG00000084332	predicted gene 8840 [Source:MGI Symbol;Acc:MGI:3647579]	0	0	0	0	0	0	0	2	1	0.258115	-1.26335	2.39965	-0.526473	0.59856	NA	no	0.258115	-1.35564	2.39965	-0.56493	0.572121	NA	no	0.258115	0	2.40591	0	1	NA	no
Pced1c-ps	1	69377321	ENSMUSG00000101387	PC-esterase domain containing 1C, pseudogene [Source:MGI Symbol;Acc:MGI:3644590]	0	0	0	0	0	0	0	0	0	0	NA	NA	NA	NA	NA	no	0	NA	NA	NA	NA	NA	no	0	NA	NA	NA	NA	NA	no
Gm28497	1	69441056	ENSMUSG00000099804	predicted gene 28497 [Source:MGI Symbol;Acc:MGI:5579203]	0	0	0	0	0	0	0	0	0	0	NA	NA	NA	NA	NA	no	0	NA	NA	NA	NA	NA	no	0	NA	NA	NA	NA	NA	no
Gm29113	1	69490357	ENSMUSG00000100354	predicted gene 29113 [Source:MGI Symbol;Acc:MGI:5579819]	0	0	0	0	0	0	0	0	0	0	NA	NA	NA	NA	NA	no	0	NA	NA	NA	NA	NA	no	0	NA	NA	NA	NA	NA	no
Gm29114	1	69513932	ENSMUSG00000101156	predicted gene 29114 [Source:MGI Symbol;Acc:MGI:5579820]	0	0	0	0	0	0	0	0	0	0	NA	NA	NA	NA	NA	no	0	NA	NA	NA	NA	NA	no	0	NA	NA	NA	NA	NA	no
Ikzf2	1	69531214	ENSMUSG00000025997	IKAROS family zinc finger 2 [Source:MGI Symbol;Acc:MGI:1342541]	2541	2077	1922	2716	1347	1618	3520	2730	1611	1948.06	0.298151	0.5615	0.530989	0.595426	1	no	1948.06	-0.0420912	0.561534	-0.0749575	0.940249	1	no	1948.06	0.340242	0.561568	0.605878	0.544596	1	no
Gm29112	1	69595036	ENSMUSG00000100815	predicted gene 29112 [Source:MGI Symbol;Acc:MGI:5579818]	0	0	0	0	0	0	0	0	0	0	NA	NA	NA	NA	NA	no	0	NA	NA	NA	NA	NA	no	0	NA	NA	NA	NA	NA	no
Gm28112	1	69660187	ENSMUSG00000099954	predicted gene 28112 [Source:MGI Symbol;Acc:MGI:5578818]	0	0	50	0	0	0	118	0	112	25.2967	-1.33014	2.33	-0.570878	0.568082	0.998206	no	25.2967	-4.48689	2.33966	-1.91775	0.0551423	0.524778	no	25.2967	3.15675	2.34066	1.34866	0.177447	0.908955	no
Gm37930	1	69770868	ENSMUSG00000103402	predicted gene, 37930 [Source:MGI Symbol;Acc:MGI:5611158]	0	0	0	0	0	0	0	0	0	0	NA	NA	NA	NA	NA	no	0	NA	NA	NA	NA	NA	no	0	NA	NA	NA	NA	NA	no
Spag16	1	69826970	ENSMUSG00000053153	sperm associated antigen 16 [Source:MGI Symbol;Acc:MGI:1913972]	0	0	0	0	0	0	0	0	0	0	NA	NA	NA	NA	NA	no	0	NA	NA	NA	NA	NA	no	0	NA	NA	NA	NA	NA	no
Gm22665	1	69921473	ENSMUSG00000089345	predicted gene, 22665 [Source:MGI Symbol;Acc:MGI:5452442]	0	0	0	0	0	0	0	0	0	0	NA	NA	NA	NA	NA	no	0	NA	NA	NA	NA	NA	no	0	NA	NA	NA	NA	NA	no
Gm23879	1	69955004	ENSMUSG00000080524	predicted gene, 23879 [Source:MGI Symbol;Acc:MGI:5453656]	0	0	0	0	0	0	0	0	0	0	NA	NA	NA	NA	NA	no	0	NA	NA	NA	NA	NA	no	0	NA	NA	NA	NA	NA	no
Gm28580	1	70067968	ENSMUSG00000101730	predicted gene 28580 [Source:MGI Symbol;Acc:MGI:5579286]	0	0	0	0	0	0	0	0	0	0	NA	NA	NA	NA	NA	no	0	NA	NA	NA	NA	NA	no	0	NA	NA	NA	NA	NA	no
Gm38272	1	70310512	ENSMUSG00000103052	predicted gene, 38272 [Source:MGI Symbol;Acc:MGI:5611500]	0	0	0	0	0	0	0	0	0	0	NA	NA	NA	NA	NA	no	0	NA	NA	NA	NA	NA	no	0	NA	NA	NA	NA	NA	no
Gm37456	1	70571435	ENSMUSG00000104287	predicted gene, 37456 [Source:MGI Symbol;Acc:MGI:5610684]	0	0	0	0	0	0	0	0	0	0	NA	NA	NA	NA	NA	no	0	NA	NA	NA	NA	NA	no	0	NA	NA	NA	NA	NA	no
Gm23422	1	70596815	ENSMUSG00000075952	predicted gene, 23422 [Source:MGI Symbol;Acc:MGI:5453199]	0	0	0	0	0	0	0	0	0	0	NA	NA	NA	NA	NA	no	0	NA	NA	NA	NA	NA	no	0	NA	NA	NA	NA	NA	no
Vwc2l	1	70725715	ENSMUSG00000045648	von Willebrand factor C domain-containing protein 2-like [Source:MGI Symbol;Acc:MGI:2444069]	0	0	0	0	0	0	0	0	0	0	NA	NA	NA	NA	NA	no	0	NA	NA	NA	NA	NA	no	0	NA	NA	NA	NA	NA	no
Bard1	1	71027498	ENSMUSG00000026196	BRCA1 associated RING domain 1 [Source:MGI Symbol;Acc:MGI:1328361]	123	0	0	1	0	1	0	0	57	17.8615	0.661036	2.33014	0.283689	NA	NA	no	17.8615	-2.60415	2.33643	-1.11459	NA	NA	no	17.8615	3.26518	2.33632	1.39757	NA	NA	no
Gm16236	1	71039652	ENSMUSG00000089965	predicted gene 16236 [Source:MGI Symbol;Acc:MGI:3801868]	0	0	0	0	0	0	0	0	0	0	NA	NA	NA	NA	NA	no	0	NA	NA	NA	NA	NA	no	0	NA	NA	NA	NA	NA	no
Gm8870	1	71155246	ENSMUSG00000101551	predicted gene 8870 [Source:MGI Symbol;Acc:MGI:3645634]	0	0	0	0	0	0	0	0	0	0	NA	NA	NA	NA	NA	no	0	NA	NA	NA	NA	NA	no	0	NA	NA	NA	NA	NA	no
Abca12	1	71242276	ENSMUSG00000050296	ATP-binding cassette, sub-family A (ABC1), member 12 [Source:MGI Symbol;Acc:MGI:2676312]	0	0	0	0	0	0	0	0	0	0	NA	NA	NA	NA	NA	no	0	NA	NA	NA	NA	NA	no	0	NA	NA	NA	NA	NA	no
Gm6947	1	71493737	ENSMUSG00000101617	predicted gene 6947 [Source:MGI Symbol;Acc:MGI:3647350]	0	0	0	0	0	0	0	0	0	0	NA	NA	NA	NA	NA	no	0	NA	NA	NA	NA	NA	no	0	NA	NA	NA	NA	NA	no
Atic	1	71557150	ENSMUSG00000026192	5-aminoimidazole-4-carboxamide ribonucleotide formyltransferase/IMP cyclohydrolase [Source:MGI Symbol;Acc:MGI:1351352]	878	1012	1142	1074	335	640	1526	1433	1274	910.92	0.0419323	0.666093	0.0629526	0.949804	1	no	910.92	-0.683842	0.666314	-1.02631	0.304747	1	no	910.92	0.725774	0.666441	1.08903	0.276141	1	no
Fn1	1	71585520	ENSMUSG00000026193	fibronectin 1 [Source:MGI Symbol;Acc:MGI:95566]	0	0	0	0	0	0	0	0	1	0.107268	-0.270919	2.40591	-0.112606	0.910343	NA	no	0.107268	-0.363204	2.40591	-0.150963	0.880005	NA	no	0.107268	0	2.40591	0	1	NA	no
Apol7d	1	71652837	ENSMUSG00000073652	apolipoprotein L 7d [Source:MGI Symbol;Acc:MGI:3723449]	0	0	0	0	0	0	0	0	0	0	NA	NA	NA	NA	NA	no	0	NA	NA	NA	NA	NA	no	0	NA	NA	NA	NA	NA	no
Gm5829	1	71709705	ENSMUSG00000101834	predicted gene 5829 [Source:MGI Symbol;Acc:MGI:3644438]	0	0	0	0	0	0	0	0	0	0	NA	NA	NA	NA	NA	no	0	NA	NA	NA	NA	NA	no	0	NA	NA	NA	NA	NA	no
Gm5256	1	71714048	ENSMUSG00000100319	predicted gene 5256 [Source:MGI Symbol;Acc:MGI:3644836]	0	0	0	0	0	0	0	0	0	0	NA	NA	NA	NA	NA	no	0	NA	NA	NA	NA	NA	no	0	NA	NA	NA	NA	NA	no
Gm37217	1	71843090	ENSMUSG00000102689	predicted gene, 37217 [Source:MGI Symbol;Acc:MGI:5610445]	0	0	0	0	0	0	0	0	0	0	NA	NA	NA	NA	NA	no	0	NA	NA	NA	NA	NA	no	0	NA	NA	NA	NA	NA	no
Gm8883	1	71888112	ENSMUSG00000099707	predicted gene 8883 [Source:MGI Symbol;Acc:MGI:3649116]	0	0	0	0	0	0	0	0	0	0	NA	NA	NA	NA	NA	no	0	NA	NA	NA	NA	NA	no	0	NA	NA	NA	NA	NA	no
Gm28818	1	71894068	ENSMUSG00000101211	predicted gene 28818 [Source:MGI Symbol;Acc:MGI:5579524]	0	0	0	0	0	0	0	0	0	0	NA	NA	NA	NA	NA	no	0	NA	NA	NA	NA	NA	no	0	NA	NA	NA	NA	NA	no
4933417E11Rik	1	71958998	ENSMUSG00000101848	RIKEN cDNA 4933417E11 gene [Source:MGI Symbol;Acc:MGI:1918384]	0	0	0	0	0	0	0	0	0	0	NA	NA	NA	NA	NA	no	0	NA	NA	NA	NA	NA	no	0	NA	NA	NA	NA	NA	no
4930556G22Rik	1	71983681	ENSMUSG00000101764	RIKEN cDNA 4930556G22 gene [Source:MGI Symbol;Acc:MGI:1925457]	0	0	0	0	0	0	0	0	0	0	NA	NA	NA	NA	NA	no	0	NA	NA	NA	NA	NA	no	0	NA	NA	NA	NA	NA	no
Gm5528	1	72004288	ENSMUSG00000059483	predicted gene 5528 [Source:MGI Symbol;Acc:MGI:3643453]	0	6	1	0	2	1	1	3	0	1.56553	1.21404	2.22832	0.544823	0.585875	NA	no	1.56553	0.0422169	2.24221	0.0188283	0.984978	NA	no	1.56553	1.17182	2.23325	0.524718	0.59978	NA	no
Gm8885	1	72087857	ENSMUSG00000101496	predicted gene 8885 [Source:MGI Symbol;Acc:MGI:3649121]	0	0	0	0	0	0	1	0	0	0.065138	-0.270919	2.40591	-0.112606	0.910343	NA	no	0.065138	-0.363204	2.40591	-0.150963	0.880005	NA	no	0.065138	0	2.40591	0	1	NA	no
Gm4319	1	72107155	ENSMUSG00000102123	predicted gene 4319 [Source:MGI Symbol;Acc:MGI:3782500]	0	0	0	0	0	0	0	0	0	0	NA	NA	NA	NA	NA	no	0	NA	NA	NA	NA	NA	no	0	NA	NA	NA	NA	NA	no
Mreg	1	72159442	ENSMUSG00000039395	melanoregulin [Source:MGI Symbol;Acc:MGI:2151839]	0	0	0	0	0	0	0	0	0	0	NA	NA	NA	NA	NA	no	0	NA	NA	NA	NA	NA	no	0	NA	NA	NA	NA	NA	no
Gm25360	1	72226240	ENSMUSG00000094655	predicted gene, 25360 [Source:MGI Symbol;Acc:MGI:5455137]	0	0	0	0	231	0	132	0	0	33.3516	-3.03483	2.3644	-1.28355	NA	NA	no	33.3516	1.09267	2.35844	0.4633	NA	NA	no	33.3516	-4.12749	2.36418	-1.74585	NA	NA	no
D230017M19Rik	1	72236465	ENSMUSG00000097131	RIKEN cDNA D230017M19 gene [Source:MGI Symbol;Acc:MGI:2445071]	0	0	0	0	0	0	0	0	0	0	NA	NA	NA	NA	NA	no	0	NA	NA	NA	NA	NA	no	0	NA	NA	NA	NA	NA	no
Gm23472	1	72236946	ENSMUSG00000094050	predicted gene, 23472 [Source:MGI Symbol;Acc:MGI:5453249]	0	0	0	0	0	0	0	0	0	0	NA	NA	NA	NA	NA	no	0	NA	NA	NA	NA	NA	no	0	NA	NA	NA	NA	NA	no
Gm24497	1	72244213	ENSMUSG00000093956	predicted gene, 24497 [Source:MGI Symbol;Acc:MGI:5454274]	0	0	0	0	0	0	0	0	0	0	NA	NA	NA	NA	NA	no	0	NA	NA	NA	NA	NA	no	0	NA	NA	NA	NA	NA	no
Gm25939	1	72255008	ENSMUSG00000093843	predicted gene, 25939 [Source:MGI Symbol;Acc:MGI:5455716]	0	111	544	226	550	0	1005	17	661	297.951	-0.694087	1.87409	-0.370359	0.711115	1	no	297.951	-0.593021	1.87403	-0.316441	0.751667	1	no	297.951	-0.101066	1.87423	-0.0539241	0.956996	1	no
Pecr	1	72259167	ENSMUSG00000026189	peroxisomal trans-2-enoyl-CoA reductase [Source:MGI Symbol;Acc:MGI:2148199]	1	56	1	2	0	65	2	147	71	33.2557	-1.00315	1.84931	-0.542444	0.587513	1	no	33.2557	-1.3208	1.84967	-0.714075	0.475181	1	no	33.2557	0.317657	1.8519	0.171531	0.863806	1	no
Tmem169	1	72284369	ENSMUSG00000026188	transmembrane protein 169 [Source:MGI Symbol;Acc:MGI:2442781]	0	0	0	0	0	0	0	0	0	0	NA	NA	NA	NA	NA	no	0	NA	NA	NA	NA	NA	no	0	NA	NA	NA	NA	NA	no
Xrcc5	1	72307421	ENSMUSG00000026187	X-ray repair complementing defective repair in Chinese hamster cells 5 [Source:MGI Symbol;Acc:MGI:104517]	99	4	1	193	100	94	0	0	1	50.549	5.48444	1.62932	3.36609	0.00076241	0.041204	yes	50.549	7.32573	1.62569	4.50621	6.59944e-06	0.00173612	yes	50.549	-1.84129	1.47232	-1.2506	0.21108	0.97931	no
March4	1	72427112	ENSMUSG00000039372	membrane-associated ring finger (C3HC4) 4 [Source:MGI Symbol;Acc:MGI:2683550]	0	0	0	0	0	0	0	0	0	0	NA	NA	NA	NA	NA	no	0	NA	NA	NA	NA	NA	no	0	NA	NA	NA	NA	NA	no
Gm15843	1	72459499	ENSMUSG00000085812	predicted gene 15843 [Source:MGI Symbol;Acc:MGI:3801845]	3	1	0	3	0	0	0	0	1	0.858668	1.21059	2.39161	0.506181	0.61273	NA	no	0.858668	0.959048	2.39225	0.400897	0.688496	NA	no	0.858668	0.251539	2.38551	0.105445	0.916023	NA	no
Smarcal1	1	72583251	ENSMUSG00000039354	SWI/SNF related matrix associated, actin dependent regulator of chromatin, subfamily a-like 1 [Source:MGI Symbol;Acc:MGI:1859183]	0	156	32	162	0	0	16	0	1	44.6412	3.05494	2.19537	1.39154	0.164063	0.771761	no	44.6412	2.63689	2.19549	1.20105	0.229732	0.979288	no	44.6412	0.418051	2.19234	0.190687	0.848771	1	no
Gm39662	1	72641188	ENSMUSG00000110712	predicted gene, 39662 [Source:MGI Symbol;Acc:MGI:5622547]	0	0	0	0	0	0	0	0	0	0	NA	NA	NA	NA	NA	no	0	NA	NA	NA	NA	NA	no	0	NA	NA	NA	NA	NA	no
Ankar	1	72642980	ENSMUSG00000039342	ankyrin and armadillo repeat containing [Source:MGI Symbol;Acc:MGI:2442559]	0	0	0	0	0	0	0	0	0	0	NA	NA	NA	NA	NA	no	0	NA	NA	NA	NA	NA	no	0	NA	NA	NA	NA	NA	no
Gm18035	1	72692864	ENSMUSG00000110487	predicted gene, 18035 [Source:MGI Symbol;Acc:MGI:5010220]	0	0	0	0	0	0	0	0	0	0	NA	NA	NA	NA	NA	no	0	NA	NA	NA	NA	NA	no	0	NA	NA	NA	NA	NA	no
Gm45859	1	72706289	ENSMUSG00000110596	predicted gene 45859 [Source:MGI Symbol;Acc:MGI:5804974]	0	0	0	0	0	0	0	0	0	0	NA	NA	NA	NA	NA	no	0	NA	NA	NA	NA	NA	no	0	NA	NA	NA	NA	NA	no
Rpl37a	1	72711290	ENSMUSG00000046330	ribosomal protein L37a [Source:MGI Symbol;Acc:MGI:98068]	7896	6027	6976	6115	7338	6215	6164	6133	5921	5908.85	0.661175	0.474074	1.39467	0.163116	0.769875	no	5908.85	0.43209	0.474078	0.911432	0.362068	1	no	5908.85	0.229085	0.474065	0.483236	0.628928	1	no
Igfbp2	1	72824503	ENSMUSG00000039323	insulin-like growth factor binding protein 2 [Source:MGI Symbol;Acc:MGI:96437]	0	0	0	0	0	0	0	0	0	0	NA	NA	NA	NA	NA	no	0	NA	NA	NA	NA	NA	no	0	NA	NA	NA	NA	NA	no
Igfbp5	1	72857932	ENSMUSG00000026185	insulin-like growth factor binding protein 5 [Source:MGI Symbol;Acc:MGI:96440]	0	0	0	1	0	0	3	0	0	0.304495	-1.01422	2.40139	-0.422345	0.672773	NA	no	0.304495	-0.539423	2.40139	-0.224629	0.822268	NA	no	0.304495	-0.474794	2.40591	-0.197345	0.843558	NA	no
1700027A15Rik	1	72984844	ENSMUSG00000101968	RIKEN cDNA 1700027A15 gene [Source:MGI Symbol;Acc:MGI:1916699]	0	0	0	0	0	0	0	0	0	0	NA	NA	NA	NA	NA	no	0	NA	NA	NA	NA	NA	no	0	NA	NA	NA	NA	NA	no
Tnp1	1	73015074	ENSMUSG00000026182	transition protein 1 [Source:MGI Symbol;Acc:MGI:98784]	0	0	0	0	0	0	0	0	0	0	NA	NA	NA	NA	NA	no	0	NA	NA	NA	NA	NA	no	0	NA	NA	NA	NA	NA	no
Gm38106	1	73206890	ENSMUSG00000102266	predicted gene, 38106 [Source:MGI Symbol;Acc:MGI:5611334]	0	0	0	0	0	0	0	0	0	0	NA	NA	NA	NA	NA	no	0	NA	NA	NA	NA	NA	no	0	NA	NA	NA	NA	NA	no
Gm29185	1	73269064	ENSMUSG00000101112	predicted gene 29185 [Source:MGI Symbol;Acc:MGI:5579891]	0	0	0	0	0	0	0	0	0	0	NA	NA	NA	NA	NA	no	0	NA	NA	NA	NA	NA	no	0	NA	NA	NA	NA	NA	no
Gm29184	1	73311717	ENSMUSG00000100697	predicted gene 29184 [Source:MGI Symbol;Acc:MGI:5579890]	0	0	0	0	0	0	0	0	0	0	NA	NA	NA	NA	NA	no	0	NA	NA	NA	NA	NA	no	0	NA	NA	NA	NA	NA	no
Pinc	1	73390775	ENSMUSG00000099877	pregnancy induced noncoding RNA [Source:MGI Symbol;Acc:MGI:3623820]	0	0	0	0	0	0	0	0	0	0	NA	NA	NA	NA	NA	no	0	NA	NA	NA	NA	NA	no	0	NA	NA	NA	NA	NA	no
Gm27315	1	73392246	ENSMUSG00000098697	predicted gene, 27315 [Source:MGI Symbol;Acc:MGI:5530697]	0	0	0	0	0	0	0	0	0	0	NA	NA	NA	NA	NA	no	0	NA	NA	NA	NA	NA	no	0	NA	NA	NA	NA	NA	no
D530049I02Rik	1	73398968	ENSMUSG00000101812	RIKEN cDNA D530049I02 gene [Source:MGI Symbol;Acc:MGI:1925968]	0	0	0	0	0	0	0	0	0	0	NA	NA	NA	NA	NA	no	0	NA	NA	NA	NA	NA	no	0	NA	NA	NA	NA	NA	no
Gm9553	1	73512046	ENSMUSG00000100044	predicted gene 9553 [Source:MGI Symbol;Acc:MGI:3779963]	0	0	0	0	0	0	0	0	0	0	NA	NA	NA	NA	NA	no	0	NA	NA	NA	NA	NA	no	0	NA	NA	NA	NA	NA	no
C530043A13Rik	1	73522095	ENSMUSG00000100444	RIKEN cDNA C530043A13 gene [Source:MGI Symbol;Acc:MGI:2441914]	0	0	0	0	0	0	0	0	0	0	NA	NA	NA	NA	NA	no	0	NA	NA	NA	NA	NA	no	0	NA	NA	NA	NA	NA	no
Gm29186	1	73528937	ENSMUSG00000100429	predicted gene 29186 [Source:MGI Symbol;Acc:MGI:5579892]	0	0	0	0	0	0	0	0	0	0	NA	NA	NA	NA	NA	no	0	NA	NA	NA	NA	NA	no	0	NA	NA	NA	NA	NA	no
6030407O03Rik	1	73618088	ENSMUSG00000100301	RIKEN cDNA 6030407O03 gene [Source:MGI Symbol;Acc:MGI:1924410]	0	0	0	0	0	0	0	0	0	0	NA	NA	NA	NA	NA	no	0	NA	NA	NA	NA	NA	no	0	NA	NA	NA	NA	NA	no
Gm29183	1	73750321	ENSMUSG00000101344	predicted gene 29183 [Source:MGI Symbol;Acc:MGI:5579889]	0	0	0	0	0	0	0	0	0	0	NA	NA	NA	NA	NA	no	0	NA	NA	NA	NA	NA	no	0	NA	NA	NA	NA	NA	no
Gm25329	1	73763710	ENSMUSG00000088666	predicted gene, 25329 [Source:MGI Symbol;Acc:MGI:5455106]	0	0	0	0	0	0	0	0	0	0	NA	NA	NA	NA	NA	no	0	NA	NA	NA	NA	NA	no	0	NA	NA	NA	NA	NA	no
Mir6351	1	73855477	ENSMUSG00000098504	microRNA 6351 [Source:MGI Symbol;Acc:MGI:5531318]	0	0	0	0	0	0	0	0	0	0	NA	NA	NA	NA	NA	no	0	NA	NA	NA	NA	NA	no	0	NA	NA	NA	NA	NA	no
Tns1	1	73910231	ENSMUSG00000055322	tensin 1 [Source:MGI Symbol;Acc:MGI:104552]	21	1	12	45	10	18	1	93	37	22.1512	-1.50782	1.43087	-1.05378	0.291984	0.911169	no	22.1512	-0.483023	1.42231	-0.339606	0.734154	1	no	22.1512	-1.0248	1.43368	-0.714802	0.474731	1	no
Rufy4	1	74125541	ENSMUSG00000061815	RUN and FYVE domain containing 4 [Source:MGI Symbol;Acc:MGI:3588214]	0	0	0	0	0	0	0	0	0	0	NA	NA	NA	NA	NA	no	0	NA	NA	NA	NA	NA	no	0	NA	NA	NA	NA	NA	no
Cxcr2	1	74153989	ENSMUSG00000026180	chemokine (C-X-C motif) receptor 2 [Source:MGI Symbol;Acc:MGI:105303]	0	0	0	0	0	0	0	0	0	0	NA	NA	NA	NA	NA	no	0	NA	NA	NA	NA	NA	no	0	NA	NA	NA	NA	NA	no
Cxcr1	1	74191785	ENSMUSG00000048480	chemokine (C-X-C motif) receptor 1 [Source:MGI Symbol;Acc:MGI:2448715]	0	0	0	0	0	0	0	0	0	0	NA	NA	NA	NA	NA	no	0	NA	NA	NA	NA	NA	no	0	NA	NA	NA	NA	NA	no
Mir1928	1	74206554	ENSMUSG00000087820	microRNA 1928 [Source:MGI Symbol;Acc:MGI:3836960]	0	0	0	0	0	0	0	0	0	0	NA	NA	NA	NA	NA	no	0	NA	NA	NA	NA	NA	no	0	NA	NA	NA	NA	NA	no
Gm25524	1	74212813	ENSMUSG00000094768	predicted gene, 25524 [Source:MGI Symbol;Acc:MGI:5455301]	0	0	0	0	0	0	0	0	0	0	NA	NA	NA	NA	NA	no	0	NA	NA	NA	NA	NA	no	0	NA	NA	NA	NA	NA	no
Arpc2	1	74236084	ENSMUSG00000006304	actin related protein 2/3 complex, subunit 2 [Source:MGI Symbol;Acc:MGI:1923959]	2017	1785	1536	1490	1468	1669	1507	1631	1938	1519.06	0.514578	0.549498	0.93645	0.349041	0.954732	no	1519.06	0.142955	0.549548	0.260132	0.794762	1	no	1519.06	0.371623	0.549543	0.67624	0.498888	1	no
Gpbar1	1	74278550	ENSMUSG00000064272	G protein-coupled bile acid receptor 1 [Source:MGI Symbol;Acc:MGI:2653863]	0	0	0	0	0	0	0	0	0	0	NA	NA	NA	NA	NA	no	0	NA	NA	NA	NA	NA	no	0	NA	NA	NA	NA	NA	no
Aamp	1	74279840	ENSMUSG00000006299	angio-associated migratory protein [Source:MGI Symbol;Acc:MGI:107809]	879	392	347	1027	194	1335	504	1347	1723	752.83	-0.817248	0.923997	-0.884471	0.376442	0.964967	no	752.83	-0.304651	0.92376	-0.329794	0.741556	1	no	752.83	-0.512598	0.924133	-0.554679	0.579114	1	no
Gm28364	1	74281161	ENSMUSG00000101503	predicted gene 28364 [Source:MGI Symbol;Acc:MGI:5579070]	0	0	0	0	0	0	0	0	0	0	NA	NA	NA	NA	NA	no	0	NA	NA	NA	NA	NA	no	0	NA	NA	NA	NA	NA	no
Pnkd	1	74284930	ENSMUSG00000026179	paroxysmal nonkinesiogenic dyskinesia [Source:MGI Symbol;Acc:MGI:1930773]	59	11	0	0	79	326	292	0	3	65.0808	-1.09131	2.04583	-0.533432	0.593735	1	no	65.0808	0.788456	2.04418	0.385708	0.699713	1	no	65.0808	-1.87977	2.04563	-0.918919	0.358138	1	no
Gm37503	1	74287542	ENSMUSG00000103013	predicted gene, 37503 [Source:MGI Symbol;Acc:MGI:5610731]	0	0	0	0	0	0	0	0	0	0	NA	NA	NA	NA	NA	no	0	NA	NA	NA	NA	NA	no	0	NA	NA	NA	NA	NA	no
Tmbim1	1	74288247	ENSMUSG00000006301	transmembrane BAX inhibitor motif containing 1 [Source:MGI Symbol;Acc:MGI:1916910]	16	0	0	0	0	314	0	1	0	30.6339	1.64602	2.36546	0.695855	NA	NA	no	30.6339	4.61772	2.36294	1.95423	NA	NA	no	30.6339	-2.97171	2.35946	-1.25948	NA	NA	no
Gm29358	1	74295603	ENSMUSG00000099931	predicted gene 29358 [Source:MGI Symbol;Acc:MGI:5580064]	0	0	0	0	0	0	0	0	0	0	NA	NA	NA	NA	NA	no	0	NA	NA	NA	NA	NA	no	0	NA	NA	NA	NA	NA	no
Gm37931	1	74307848	ENSMUSG00000103403	predicted gene, 37931 [Source:MGI Symbol;Acc:MGI:5611159]	0	0	0	0	0	0	0	0	0	0	NA	NA	NA	NA	NA	no	0	NA	NA	NA	NA	NA	no	0	NA	NA	NA	NA	NA	no
Catip	1	74362108	ENSMUSG00000073650	ciliogenesis associated TTC17 interacting protein [Source:MGI Symbol;Acc:MGI:2685062]	0	0	0	0	0	0	0	0	0	0	NA	NA	NA	NA	NA	no	0	NA	NA	NA	NA	NA	no	0	NA	NA	NA	NA	NA	no
Slc11a1	1	74375195	ENSMUSG00000026177	solute carrier family 11 (proton-coupled divalent metal ion transporters), member 1 [Source:MGI Symbol;Acc:MGI:1345275]	0	0	0	0	0	0	0	0	0	0	NA	NA	NA	NA	NA	no	0	NA	NA	NA	NA	NA	no	0	NA	NA	NA	NA	NA	no
Ctdsp1	1	74391509	ENSMUSG00000026176	CTD (carboxy-terminal domain, RNA polymerase II, polypeptide A) small phosphatase 1 [Source:MGI Symbol;Acc:MGI:2654470]	83	0	73	59	0	44	16	3	10	28.8102	2.35413	1.72769	1.36259	0.173012	0.785628	no	28.8102	1.8313	1.72838	1.05955	0.28935	1	no	28.8102	0.52283	1.72174	0.303664	0.761384	1	no
Mir26b	1	74394310	ENSMUSG00000065468	microRNA 26b [Source:MGI Symbol;Acc:MGI:2676901]	0	0	0	0	0	0	0	0	0	0	NA	NA	NA	NA	NA	no	0	NA	NA	NA	NA	NA	no	0	NA	NA	NA	NA	NA	no
Vil1	1	74409376	ENSMUSG00000026175	villin 1 [Source:MGI Symbol;Acc:MGI:98930]	0	0	0	0	0	0	1	0	0	0.065138	-0.270919	2.40591	-0.112606	0.910343	NA	no	0.065138	-0.363204	2.40591	-0.150963	0.880005	NA	no	0.065138	0	2.40591	0	1	NA	no
Usp37	1	74435511	ENSMUSG00000033364	ubiquitin specific peptidase 37 [Source:MGI Symbol;Acc:MGI:2442483]	68	91	2	1	159	3	2	131	75	55.0601	0.100897	1.67345	0.0602924	0.951923	1	no	55.0601	-0.0441327	1.67341	-0.0263729	0.97896	1	no	55.0601	0.145029	1.67389	0.0866419	0.930956	1	no
Gm37733	1	74500340	ENSMUSG00000103227	predicted gene, 37733 [Source:MGI Symbol;Acc:MGI:5610961]	0	0	0	0	0	0	0	0	22	2.3599	-3.4626	2.38669	-1.4508	NA	NA	no	2.3599	-3.55489	2.38669	-1.48947	NA	NA	no	2.3599	0	2.40591	0	NA	NA	no
Cnot9	1	74506058	ENSMUSG00000026174	CCR4-NOT transcription complex, subunit 9 [Source:MGI Symbol;Acc:MGI:1928902]	189	2	13	0	168	80	0	32	3	47.6217	2.30439	1.85121	1.24481	0.213203	0.839648	no	47.6217	2.62644	1.85073	1.41914	0.15586	0.859328	no	47.6217	-0.322044	1.8466	-0.174398	0.861553	1	no
Plcd4	1	74542888	ENSMUSG00000026173	phospholipase C, delta 4 [Source:MGI Symbol;Acc:MGI:107469]	0	0	0	0	0	0	0	0	0	0	NA	NA	NA	NA	NA	no	0	NA	NA	NA	NA	NA	no	0	NA	NA	NA	NA	NA	no
Zfp142	1	74565127	ENSMUSG00000026135	zinc finger protein 142 [Source:MGI Symbol;Acc:MGI:1924514]	3	3	0	0	0	39	0	1	1	4.5009	1.19772	2.27314	0.526901	NA	NA	no	4.5009	2.92054	2.26383	1.29009	NA	NA	no	4.5009	-1.72282	2.2558	-0.763727	NA	NA	no
Gm25035	1	74586896	ENSMUSG00000093155	predicted gene, 25035 [Source:MGI Symbol;Acc:MGI:5454812]	0	0	0	0	0	0	0	0	0	0	NA	NA	NA	NA	NA	no	0	NA	NA	NA	NA	NA	no	0	NA	NA	NA	NA	NA	no
Bcs1l	1	74588289	ENSMUSG00000026172	BCS1-like (yeast) [Source:MGI Symbol;Acc:MGI:1914071]	128	0	0	0	0	61	0	8	0	18.2631	2.52031	2.36081	1.06756	NA	NA	no	18.2631	1.77038	2.36112	0.749806	NA	NA	no	18.2631	0.749931	2.35916	0.317881	NA	NA	no
Rnf25	1	74593748	ENSMUSG00000026171	ring finger protein 25 [Source:MGI Symbol;Acc:MGI:1890215]	0	0	15	8	0	0	0	0	7	3.30243	0.742677	2.36567	0.313939	0.753567	NA	no	3.30243	0.136676	2.36692	0.0577443	0.953952	NA	no	3.30243	0.606001	2.36624	0.256103	0.797872	NA	no
Stk36	1	74601445	ENSMUSG00000033276	serine/threonine kinase 36 [Source:MGI Symbol;Acc:MGI:1920831]	0	0	0	0	0	0	0	0	0	0	NA	NA	NA	NA	NA	no	0	NA	NA	NA	NA	NA	no	0	NA	NA	NA	NA	NA	no
Ttll4	1	74661745	ENSMUSG00000033257	tubulin tyrosine ligase-like family, member 4 [Source:MGI Symbol;Acc:MGI:1914784]	2	0	0	0	0	3	0	215	20	18.8267	-4.84328	2.17326	-2.22858	0.0258419	0.313521	no	18.8267	-4.5458	2.1632	-2.10142	0.035604	0.414967	no	18.8267	-0.297477	2.1985	-0.135309	0.892368	1	no
Cyp27a1	1	74713574	ENSMUSG00000026170	cytochrome P450, family 27, subfamily a, polypeptide 1 [Source:MGI Symbol;Acc:MGI:88594]	0	0	0	0	0	0	0	0	0	0	NA	NA	NA	NA	NA	no	0	NA	NA	NA	NA	NA	no	0	NA	NA	NA	NA	NA	no
Prkag3	1	74738922	ENSMUSG00000006542	protein kinase, AMP-activated, gamma 3 non-catatlytic subunit [Source:MGI Symbol;Acc:MGI:1891343]	0	0	0	0	0	0	0	0	0	0	NA	NA	NA	NA	NA	no	0	NA	NA	NA	NA	NA	no	0	NA	NA	NA	NA	NA	no
Gm27507	1	74764798	ENSMUSG00000098351	predicted gene, 27507 [Source:MGI Symbol;Acc:MGI:5530889]	0	0	0	0	0	0	0	0	0	0	NA	NA	NA	NA	NA	no	0	NA	NA	NA	NA	NA	no	0	NA	NA	NA	NA	NA	no
Wnt6	1	74771892	ENSMUSG00000033227	wingless-type MMTV integration site family, member 6 [Source:MGI Symbol;Acc:MGI:98960]	0	0	0	0	0	0	0	0	0	0	NA	NA	NA	NA	NA	no	0	NA	NA	NA	NA	NA	no	0	NA	NA	NA	NA	NA	no
Gm29539	1	74774943	ENSMUSG00000099472	predicted gene 29539 [Source:MGI Symbol;Acc:MGI:5580245]	0	0	0	0	0	0	0	0	0	0	NA	NA	NA	NA	NA	no	0	NA	NA	NA	NA	NA	no	0	NA	NA	NA	NA	NA	no
Wnt10a	1	74791516	ENSMUSG00000026167	wingless-type MMTV integration site family, member 10A [Source:MGI Symbol;Acc:MGI:108071]	0	0	50	0	0	0	0	0	0	5.59635	5.24313	2.38597	2.19749	NA	NA	no	5.59635	0	2.40591	0	NA	NA	no	5.59635	5.15388	2.38597	2.16008	NA	NA	no
Gm16582	1	74850895	ENSMUSG00000089964	predicted gene 16582 [Source:MGI Symbol;Acc:MGI:4415002]	0	0	0	0	0	0	0	0	0	0	NA	NA	NA	NA	NA	no	0	NA	NA	NA	NA	NA	no	0	NA	NA	NA	NA	NA	no
Cdk5r2	1	74854934	ENSMUSG00000090071	cyclin-dependent kinase 5, regulatory subunit 2 (p39) [Source:MGI Symbol;Acc:MGI:1330828]	0	0	0	0	0	0	1	0	0	0.065138	-0.270919	2.40591	-0.112606	0.910343	NA	no	0.065138	-0.363204	2.40591	-0.150963	0.880005	NA	no	0.065138	0	2.40591	0	1	NA	no
Fev	1	74881509	ENSMUSG00000055197	FEV (ETS oncogene family) [Source:MGI Symbol;Acc:MGI:2449712]	0	0	0	0	0	0	0	0	0	0	NA	NA	NA	NA	NA	no	0	NA	NA	NA	NA	NA	no	0	NA	NA	NA	NA	NA	no
Cryba2	1	74889934	ENSMUSG00000006546	crystallin, beta A2 [Source:MGI Symbol;Acc:MGI:104336]	0	0	1	0	0	0	0	0	0	0.111927	0.863238	2.40591	0.358799	0.719746	NA	no	0.111927	0	2.40591	0	1	NA	no	0.111927	0.659364	2.40591	0.27406	0.784039	NA	no
Mir375	1	74900658	ENSMUSG00000065616	microRNA 375 [Source:MGI Symbol;Acc:MGI:3619376]	0	0	0	0	0	0	0	0	0	0	NA	NA	NA	NA	NA	no	0	NA	NA	NA	NA	NA	no	0	NA	NA	NA	NA	NA	no
Cfap65	1	74902071	ENSMUSG00000047021	cilia and flagella associated protein 65 [Source:MGI Symbol;Acc:MGI:2444274]	0	0	0	0	0	0	0	0	0	0	NA	NA	NA	NA	NA	no	0	NA	NA	NA	NA	NA	no	0	NA	NA	NA	NA	NA	no
Gm15841	1	74902371	ENSMUSG00000089653	predicted gene 15841 [Source:MGI Symbol;Acc:MGI:3801860]	0	0	0	0	0	0	0	0	0	0	NA	NA	NA	NA	NA	no	0	NA	NA	NA	NA	NA	no	0	NA	NA	NA	NA	NA	no
Ihh	1	74945315	ENSMUSG00000006538	Indian hedgehog [Source:MGI Symbol;Acc:MGI:96533]	0	0	0	0	0	0	0	0	0	0	NA	NA	NA	NA	NA	no	0	NA	NA	NA	NA	NA	no	0	NA	NA	NA	NA	NA	no
Gm37744	1	74954252	ENSMUSG00000103145	predicted gene, 37744 [Source:MGI Symbol;Acc:MGI:5610972]	0	0	0	0	0	0	0	0	0	0	NA	NA	NA	NA	NA	no	0	NA	NA	NA	NA	NA	no	0	NA	NA	NA	NA	NA	no
Nhej1	1	74967139	ENSMUSG00000026162	nonhomologous end-joining factor 1 [Source:MGI Symbol;Acc:MGI:1922820]	88	0	0	0	2	0	0	0	0	8.47458	4.81766	2.38162	2.02285	NA	NA	no	8.47458	1.24125	2.39219	0.518876	NA	NA	no	8.47458	3.57641	2.37256	1.50741	NA	NA	no
Slc23a3	1	75125541	ENSMUSG00000026205	solute carrier family 23 (nucleobase transporters), member 3 [Source:MGI Symbol;Acc:MGI:104516]	0	0	0	0	0	0	0	0	0	0	NA	NA	NA	NA	NA	no	0	NA	NA	NA	NA	NA	no	0	NA	NA	NA	NA	NA	no
Cnppd1	1	75134554	ENSMUSG00000033159	cyclin Pas1/PHO80 domain containing 1 [Source:MGI Symbol;Acc:MGI:1916421]	200	253	455	519	975	472	1290	589	582	501.419	-0.834308	0.70015	-1.19161	0.233413	0.861981	no	501.419	0.0990284	0.699353	0.1416	0.887396	1	no	501.419	-0.933336	0.700246	-1.33287	0.182575	0.92366	no
Retreg2	1	75142778	ENSMUSG00000049339	reticulophagy regulator family member 2 [Source:MGI Symbol;Acc:MGI:2388278]	96	194	46	1	1	146	2	498	43	97.8463	-0.0152189	1.66101	-0.00916244	0.99269	1	no	97.8463	-1.40134	1.66234	-0.842992	0.399233	1	no	97.8463	1.38612	1.66263	0.833687	0.404457	1	no
Zfand2b	1	75168646	ENSMUSG00000026197	zinc finger, AN1 type domain 2B [Source:MGI Symbol;Acc:MGI:1916068]	2	2	1	263	4	0	0	0	3	30.0235	0.65062	1.98652	0.327518	NA	NA	no	30.0235	5.27422	1.95748	2.6944	NA	NA	no	30.0235	-4.6236	1.954	-2.36622	NA	NA	no
Abcb6	1	75171717	ENSMUSG00000026198	ATP-binding cassette, sub-family B (MDR/TAP), member 6 [Source:MGI Symbol;Acc:MGI:1921354]	0	0	2	1	0	0	0	0	0	0.332935	1.45434	2.40447	0.60485	0.545279	NA	no	0.332935	0.770953	2.40591	0.320441	0.748634	NA	no	0.332935	0.683391	2.40447	0.284217	0.776244	NA	no
Gm29253	1	75171731	ENSMUSG00000099519	predicted gene 29253 [Source:MGI Symbol;Acc:MGI:5579959]	0	0	0	0	0	0	0	0	0	0	NA	NA	NA	NA	NA	no	0	NA	NA	NA	NA	NA	no	0	NA	NA	NA	NA	NA	no
Atg9a	1	75180860	ENSMUSG00000033124	autophagy related 9A [Source:MGI Symbol;Acc:MGI:2138446]	0	0	0	0	0	0	0	0	0	0	NA	NA	NA	NA	NA	no	0	NA	NA	NA	NA	NA	no	0	NA	NA	NA	NA	NA	no
Ankzf1	1	75192151	ENSMUSG00000026199	ankyrin repeat and zinc finger domain containing 1 [Source:MGI Symbol;Acc:MGI:1098746]	0	0	0	96	0	13	0	0	0	11.6747	0	2.40591	0	1	1	no	11.6747	5.71542	2.3849	2.39651	0.0165522	0.270341	no	11.6747	-5.59686	2.3849	-2.34679	0.0189359	0.298668	no
Glb1l	1	75198236	ENSMUSG00000026200	galactosidase, beta 1-like [Source:MGI Symbol;Acc:MGI:1921827]	0	1	0	0	0	0	0	0	21	2.39519	-2.69305	2.38395	-1.12966	NA	NA	no	2.39519	-3.44943	2.38663	-1.44531	NA	NA	no	2.39519	0.756383	2.40367	0.314678	NA	NA	no
Gm27943	1	75209613	ENSMUSG00000099204	predicted gene, 27943 [Source:MGI Symbol;Acc:MGI:5531325]	0	0	0	0	0	0	0	0	0	0	NA	NA	NA	NA	NA	no	0	NA	NA	NA	NA	NA	no	0	NA	NA	NA	NA	NA	no
Stk16	1	75210838	ENSMUSG00000026201	serine/threonine kinase 16 [Source:MGI Symbol;Acc:MGI:1313271]	0	1	7	0	7	238	1	128	100	44.1461	-3.5398	1.89004	-1.87287	NA	NA	no	44.1461	0.132313	1.87306	0.0706398	NA	NA	no	44.1461	-3.67212	1.89019	-1.94272	NA	NA	no
Tuba4a	1	75214228	ENSMUSG00000026202	tubulin, alpha 4A [Source:MGI Symbol;Acc:MGI:1095410]	1305	1189	760	841	1334	1789	4164	1346	1261	1285.32	-0.422134	0.668332	-0.631623	0.527633	0.99208	no	1285.32	-0.337567	0.668259	-0.505144	0.613458	1	no	1285.32	-0.0845667	0.668467	-0.126508	0.899329	1	no
A630095N17Rik	1	75220095	ENSMUSG00000096094	RIKEN cDNA A630095N17 gene [Source:MGI Symbol;Acc:MGI:2686470]	0	0	0	0	0	0	0	0	0	0	NA	NA	NA	NA	NA	no	0	NA	NA	NA	NA	NA	no	0	NA	NA	NA	NA	NA	no
Dnajb2	1	75236406	ENSMUSG00000026203	DnaJ heat shock protein family (Hsp40) member B2 [Source:MGI Symbol;Acc:MGI:1928739]	19	0	0	0	99	0	0	317	137	50.997	-2.90532	2.28503	-1.27146	0.203567	0.830494	no	50.997	-1.34695	2.28331	-0.589914	0.555249	1	no	50.997	-1.55836	2.28554	-0.681835	0.495343	1	no
Ptprn	1	75247027	ENSMUSG00000026204	protein tyrosine phosphatase, receptor type, N [Source:MGI Symbol;Acc:MGI:102765]	0	0	0	0	0	0	0	0	0	0	NA	NA	NA	NA	NA	no	0	NA	NA	NA	NA	NA	no	0	NA	NA	NA	NA	NA	no
Gm28294	1	75252322	ENSMUSG00000101840	predicted gene 28294 [Source:MGI Symbol;Acc:MGI:5579000]	0	0	0	0	0	0	0	0	0	0	NA	NA	NA	NA	NA	no	0	NA	NA	NA	NA	NA	no	0	NA	NA	NA	NA	NA	no
Resp18	1	75272199	ENSMUSG00000033061	regulated endocrine-specific protein 18 [Source:MGI Symbol;Acc:MGI:1098222]	0	0	0	0	0	0	0	0	0	0	NA	NA	NA	NA	NA	no	0	NA	NA	NA	NA	NA	no	0	NA	NA	NA	NA	NA	no
Gm28902	1	75272605	ENSMUSG00000100556	predicted gene 28902 [Source:MGI Symbol;Acc:MGI:5579608]	0	0	0	0	0	0	0	0	0	0	NA	NA	NA	NA	NA	no	0	NA	NA	NA	NA	NA	no	0	NA	NA	NA	NA	NA	no
Dnpep	1	75307896	ENSMUSG00000026209	aspartyl aminopeptidase [Source:MGI Symbol;Acc:MGI:1278328]	94	0	80	43	35	165	358	104	82	81.4466	-1.07156	1.34157	-0.798737	0.424443	0.98062	no	81.4466	-0.692263	1.34047	-0.516433	0.605552	1	no	81.4466	-0.3793	1.34276	-0.282478	0.777577	1	no
Des	1	75360329	ENSMUSG00000026208	desmin [Source:MGI Symbol;Acc:MGI:94885]	0	0	0	0	0	0	0	0	0	0	NA	NA	NA	NA	NA	no	0	NA	NA	NA	NA	NA	no	0	NA	NA	NA	NA	NA	no
Gm15179	1	75368212	ENSMUSG00000085653	predicted gene 15179 [Source:MGI Symbol;Acc:MGI:3705125]	0	0	0	0	0	0	0	0	0	0	NA	NA	NA	NA	NA	no	0	NA	NA	NA	NA	NA	no	0	NA	NA	NA	NA	NA	no
Speg	1	75375297	ENSMUSG00000026207	SPEG complex locus [Source:MGI Symbol;Acc:MGI:109282]	0	0	0	0	0	0	0	0	0	0	NA	NA	NA	NA	NA	no	0	NA	NA	NA	NA	NA	no	0	NA	NA	NA	NA	NA	no
Gm15178	1	75392131	ENSMUSG00000086053	predicted gene 15178 [Source:MGI Symbol;Acc:MGI:3705132]	0	0	0	0	0	0	0	0	0	0	NA	NA	NA	NA	NA	no	0	NA	NA	NA	NA	NA	no	0	NA	NA	NA	NA	NA	no
Gmppa	1	75435930	ENSMUSG00000033021	GDP-mannose pyrophosphorylase A [Source:MGI Symbol;Acc:MGI:1916330]	2	13	0	0	581	0	2	1	1	64.6124	1.81998	2.05454	0.885836	NA	NA	no	64.6124	5.81721	2.04685	2.84202	NA	NA	no	64.6124	-3.99722	2.03454	-1.96468	NA	NA	no
Asic4	1	75450436	ENSMUSG00000033007	acid-sensing (proton-gated) ion channel family member 4 [Source:MGI Symbol;Acc:MGI:2652846]	0	0	0	0	0	0	0	0	0	0	NA	NA	NA	NA	NA	no	0	NA	NA	NA	NA	NA	no	0	NA	NA	NA	NA	NA	no
Gm37264	1	75468570	ENSMUSG00000102605	predicted gene, 37264 [Source:MGI Symbol;Acc:MGI:5610492]	0	0	0	0	0	0	0	0	0	0	NA	NA	NA	NA	NA	no	0	NA	NA	NA	NA	NA	no	0	NA	NA	NA	NA	NA	no
Chpf	1	75474569	ENSMUSG00000032997	chondroitin polymerizing factor [Source:MGI Symbol;Acc:MGI:106576]	110	2	89	0	242	355	441	271	124	141.822	-1.42216	1.52989	-0.929583	0.352587	0.956133	no	141.822	-0.0784659	1.52846	-0.0513364	0.959057	1	no	141.822	-1.34369	1.53007	-0.87819	0.379841	1	no
Obsl1	1	75479310	ENSMUSG00000026211	obscurin-like 1 [Source:MGI Symbol;Acc:MGI:2138628]	0	1	0	0	0	0	1	0	0	0.207696	0.29616	2.40591	0.123097	0.902031	NA	no	0.207696	-0.363204	2.40591	-0.150963	0.880005	NA	no	0.207696	0.659364	2.40591	0.27406	0.784039	NA	no
Tmem198	1	75479532	ENSMUSG00000051703	transmembrane protein 198 [Source:MGI Symbol;Acc:MGI:2443133]	0	0	0	0	0	0	1	0	18	1.99597	-3.29226	2.38709	-1.37919	NA	NA	no	1.99597	-3.38454	2.38709	-1.41785	NA	NA	no	1.99597	0	2.40591	0	NA	NA	no
Inha	1	75507077	ENSMUSG00000032968	inhibin alpha [Source:MGI Symbol;Acc:MGI:96569]	0	0	0	0	0	0	0	0	0	0	NA	NA	NA	NA	NA	no	0	NA	NA	NA	NA	NA	no	0	NA	NA	NA	NA	NA	no
Gm15181	1	75514107	ENSMUSG00000082745	predicted gene 15181 [Source:MGI Symbol;Acc:MGI:3705876]	0	0	0	0	0	0	0	0	0	0	NA	NA	NA	NA	NA	no	0	NA	NA	NA	NA	NA	no	0	NA	NA	NA	NA	NA	no
Stk11ip	1	75521529	ENSMUSG00000026213	serine/threonine kinase 11 interacting protein [Source:MGI Symbol;Acc:MGI:1918978]	0	0	0	0	0	0	165	0	0	10.7478	-5.50963	2.38478	-2.31033	NA	NA	no	10.7478	-5.55046	2.38478	-2.32745	NA	NA	no	10.7478	0	2.40591	0	NA	NA	no
Gm15183	1	75542211	ENSMUSG00000082059	predicted gene 15183 [Source:MGI Symbol;Acc:MGI:3705481]	0	0	0	0	0	0	0	0	0	0	NA	NA	NA	NA	NA	no	0	NA	NA	NA	NA	NA	no	0	NA	NA	NA	NA	NA	no
Slc4a3	1	75546266	ENSMUSG00000006576	solute carrier family 4 (anion exchanger), member 3 [Source:MGI Symbol;Acc:MGI:109350]	0	0	0	0	0	0	0	1	0	0.0754234	-0.270919	2.40591	-0.112606	0.910343	NA	no	0.0754234	-0.363204	2.40591	-0.150963	0.880005	NA	no	0.0754234	0	2.40591	0	1	NA	no
Gm15180	1	75568083	ENSMUSG00000083244	predicted gene 15180 [Source:MGI Symbol;Acc:MGI:3705360]	3	3	1	6	2	1	2	5	0	2.28993	0.556555	1.77753	0.313105	0.754201	NA	no	2.28993	0.75303	1.76823	0.425867	0.670205	NA	no	2.28993	-0.196474	1.7664	-0.111229	0.911435	NA	no
Gm15182	1	75624654	ENSMUSG00000082528	predicted gene 15182 [Source:MGI Symbol;Acc:MGI:3705533]	0	0	0	0	0	0	0	0	0	0	NA	NA	NA	NA	NA	no	0	NA	NA	NA	NA	NA	no	0	NA	NA	NA	NA	NA	no
Gm5257	1	75636390	ENSMUSG00000082012	predicted gene 5257 [Source:MGI Symbol;Acc:MGI:3647791]	1	0	0	2	0	0	0	0	0	0.312028	0.863238	2.40591	0.358799	0.719746	NA	no	0.312028	1.37809	2.40461	0.573104	0.566574	NA	no	0.312028	-0.514853	2.40461	-0.214111	0.83046	NA	no
Gm29065	1	76016658	ENSMUSG00000099996	predicted gene 29065 [Source:MGI Symbol;Acc:MGI:5579771]	0	0	0	0	0	0	0	0	0	0	NA	NA	NA	NA	NA	no	0	NA	NA	NA	NA	NA	no	0	NA	NA	NA	NA	NA	no
Gm29068	1	76110181	ENSMUSG00000101763	predicted gene 29068 [Source:MGI Symbol;Acc:MGI:5579774]	0	0	0	0	0	0	0	0	0	0	NA	NA	NA	NA	NA	no	0	NA	NA	NA	NA	NA	no	0	NA	NA	NA	NA	NA	no
Gm29069	1	76420692	ENSMUSG00000100827	predicted gene 29069 [Source:MGI Symbol;Acc:MGI:5579775]	0	0	0	0	0	0	0	0	0	0	NA	NA	NA	NA	NA	no	0	NA	NA	NA	NA	NA	no	0	NA	NA	NA	NA	NA	no
Gm17751	1	76489133	ENSMUSG00000100553	predicted gene, 17751 [Source:MGI Symbol;Acc:MGI:5009832]	0	0	0	0	0	0	0	0	0	0	NA	NA	NA	NA	NA	no	0	NA	NA	NA	NA	NA	no	0	NA	NA	NA	NA	NA	no
Mir6343	1	76509560	ENSMUSG00000098611	microRNA 6343 [Source:MGI Symbol;Acc:MGI:5530686]	0	0	0	0	0	0	0	0	0	0	NA	NA	NA	NA	NA	no	0	NA	NA	NA	NA	NA	no	0	NA	NA	NA	NA	NA	no
Gm816	1	76890472	ENSMUSG00000100534	predicted gene 816 [Source:MGI Symbol;Acc:MGI:2685662]	0	0	0	0	0	0	0	0	0	0	NA	NA	NA	NA	NA	no	0	NA	NA	NA	NA	NA	no	0	NA	NA	NA	NA	NA	no
Gm38265	1	77143227	ENSMUSG00000102904	predicted gene, 38265 [Source:MGI Symbol;Acc:MGI:5611493]	0	0	0	0	0	0	0	0	0	0	NA	NA	NA	NA	NA	no	0	NA	NA	NA	NA	NA	no	0	NA	NA	NA	NA	NA	no
Gm25974	1	77144753	ENSMUSG00000089326	predicted gene, 25974 [Source:MGI Symbol;Acc:MGI:5455751]	0	0	0	0	0	0	0	0	0	0	NA	NA	NA	NA	NA	no	0	NA	NA	NA	NA	NA	no	0	NA	NA	NA	NA	NA	no
Epha4	1	77367185	ENSMUSG00000026235	Eph receptor A4 [Source:MGI Symbol;Acc:MGI:98277]	0	0	0	0	0	0	0	0	0	0	NA	NA	NA	NA	NA	no	0	NA	NA	NA	NA	NA	no	0	NA	NA	NA	NA	NA	no
Mir6352	1	77496653	ENSMUSG00000099141	microRNA 6352 [Source:MGI Symbol;Acc:MGI:5530863]	0	0	0	0	0	0	0	0	0	0	NA	NA	NA	NA	NA	no	0	NA	NA	NA	NA	NA	no	0	NA	NA	NA	NA	NA	no
Gm28386	1	77515280	ENSMUSG00000101849	predicted gene 28386 [Source:MGI Symbol;Acc:MGI:5579092]	0	0	0	0	0	0	0	0	0	0	NA	NA	NA	NA	NA	no	0	NA	NA	NA	NA	NA	no	0	NA	NA	NA	NA	NA	no
Gm28385	1	77570672	ENSMUSG00000101506	predicted gene 28385 [Source:MGI Symbol;Acc:MGI:5579091]	0	0	0	0	0	0	0	0	0	0	NA	NA	NA	NA	NA	no	0	NA	NA	NA	NA	NA	no	0	NA	NA	NA	NA	NA	no
Gm26263	1	77898283	ENSMUSG00000065215	predicted gene, 26263 [Source:MGI Symbol;Acc:MGI:5456040]	0	0	0	0	0	0	0	0	0	0	NA	NA	NA	NA	NA	no	0	NA	NA	NA	NA	NA	no	0	NA	NA	NA	NA	NA	no
Gm28387	1	77942966	ENSMUSG00000102052	predicted gene 28387 [Source:MGI Symbol;Acc:MGI:5579093]	0	0	0	0	0	0	0	0	0	0	NA	NA	NA	NA	NA	no	0	NA	NA	NA	NA	NA	no	0	NA	NA	NA	NA	NA	no
Pax3	1	78101267	ENSMUSG00000004872	paired box 3 [Source:MGI Symbol;Acc:MGI:97487]	0	0	0	0	0	0	0	0	0	0	NA	NA	NA	NA	NA	no	0	NA	NA	NA	NA	NA	no	0	NA	NA	NA	NA	NA	no
Sgpp2	1	78310345	ENSMUSG00000032908	sphingosine-1-phosphate phosphotase 2 [Source:MGI Symbol;Acc:MGI:3589109]	0	0	0	0	0	0	1	0	1	0.172406	-0.813512	2.404	-0.338399	0.735063	NA	no	0.172406	-0.905797	2.404	-0.376787	0.706332	NA	no	0.172406	0	2.40591	0	1	NA	no
Gm28410	1	78325628	ENSMUSG00000099561	predicted gene 28410 [Source:MGI Symbol;Acc:MGI:5579116]	0	0	0	0	0	0	0	0	0	0	NA	NA	NA	NA	NA	no	0	NA	NA	NA	NA	NA	no	0	NA	NA	NA	NA	NA	no
Gm37884	1	78375614	ENSMUSG00000102945	predicted gene, 37884 [Source:MGI Symbol;Acc:MGI:5611112]	0	0	0	0	0	0	0	0	0	0	NA	NA	NA	NA	NA	no	0	NA	NA	NA	NA	NA	no	0	NA	NA	NA	NA	NA	no
Farsb	1	78417975	ENSMUSG00000026245	phenylalanyl-tRNA synthetase, beta subunit [Source:MGI Symbol;Acc:MGI:1346035]	440	216	157	276	191	378	397	187	186	235.135	0.571571	0.639559	0.893696	0.371485	0.964688	no	235.135	0.504853	0.639418	0.78955	0.42979	1	no	235.135	0.0667181	0.639306	0.10436	0.916884	1	no
Gm28995	1	78433352	ENSMUSG00000101798	predicted gene 28995 [Source:MGI Symbol;Acc:MGI:5579701]	0	0	0	0	0	0	0	0	0	0	NA	NA	NA	NA	NA	no	0	NA	NA	NA	NA	NA	no	0	NA	NA	NA	NA	NA	no
4833412K13Rik	1	78465448	ENSMUSG00000104018	RIKEN cDNA 4833412K13 gene [Source:MGI Symbol;Acc:MGI:1921857]	0	30	122	0	0	48	0	78	11	29.4366	0.999595	2.17356	0.459888	0.645597	1	no	29.4366	-0.47079	2.17489	-0.216466	0.828624	1	no	29.4366	1.47039	2.17451	0.676193	0.498918	1	no
BC035947	1	78497026	ENSMUSG00000090486	cDNA sequence BC035947 [Source:MGI Symbol;Acc:MGI:2652858]	0	0	0	0	0	0	0	0	0	0	NA	NA	NA	NA	NA	no	0	NA	NA	NA	NA	NA	no	0	NA	NA	NA	NA	NA	no
Mogat1	1	78510991	ENSMUSG00000012187	monoacylglycerol O-acyltransferase 1 [Source:MGI Symbol;Acc:MGI:1915643]	0	0	0	0	0	0	0	0	0	0	NA	NA	NA	NA	NA	no	0	NA	NA	NA	NA	NA	no	0	NA	NA	NA	NA	NA	no
5730419F03Rik	1	78595031	ENSMUSG00000099364	RIKEN cDNA 5730419F03 gene [Source:MGI Symbol;Acc:MGI:1917787]	0	0	0	0	0	0	0	0	0	0	NA	NA	NA	NA	NA	no	0	NA	NA	NA	NA	NA	no	0	NA	NA	NA	NA	NA	no
Gm29611	1	78615467	ENSMUSG00000100562	predicted gene 29611 [Source:MGI Symbol;Acc:MGI:5580317]	0	0	0	0	0	0	0	0	0	0	NA	NA	NA	NA	NA	no	0	NA	NA	NA	NA	NA	no	0	NA	NA	NA	NA	NA	no
Acsl3	1	78657825	ENSMUSG00000032883	acyl-CoA synthetase long-chain family member 3 [Source:MGI Symbol;Acc:MGI:1921455]	0	1	0	0	0	0	61	0	0	4.11598	-3.20019	2.38093	-1.3441	NA	NA	no	4.11598	-4.02506	2.38561	-1.68723	NA	NA	no	4.11598	0.824865	2.40202	0.343404	NA	NA	no
Utp14b	1	78658038	ENSMUSG00000079470	UTP14B small subunit processome component [Source:MGI Symbol;Acc:MGI:2445092]	0	0	0	0	0	4	0	78	65	13.2256	-5.16939	2.34163	-2.2076	0.0272723	0.322494	no	13.2256	-3.64959	2.31946	-1.57347	0.115611	0.750297	no	13.2256	-1.51979	2.35194	-0.646187	0.518158	1	no
Gm6159	1	78783136	ENSMUSG00000099377	predicted gene 6159 [Source:MGI Symbol;Acc:MGI:3644323]	0	0	0	0	3	0	0	0	0	0.321472	0	2.40591	0	1	NA	no	0.321472	1.77705	2.40067	0.740233	0.459159	NA	no	0.321472	-1.48089	2.40067	-0.616867	0.537322	NA	no
Gm29536	1	78791623	ENSMUSG00000099706	predicted gene 29536 [Source:MGI Symbol;Acc:MGI:5580242]	0	0	0	0	0	0	0	0	0	0	NA	NA	NA	NA	NA	no	0	NA	NA	NA	NA	NA	no	0	NA	NA	NA	NA	NA	no
Kcne4	1	78816758	ENSMUSG00000047330	potassium voltage-gated channel, Isk-related subfamily, gene 4 [Source:MGI Symbol;Acc:MGI:1891125]	0	0	0	0	0	0	0	0	0	0	NA	NA	NA	NA	NA	no	0	NA	NA	NA	NA	NA	no	0	NA	NA	NA	NA	NA	no
Gm29187	1	78821258	ENSMUSG00000101324	predicted gene 29187 [Source:MGI Symbol;Acc:MGI:5579893]	0	0	0	0	0	0	0	0	0	0	NA	NA	NA	NA	NA	no	0	NA	NA	NA	NA	NA	no	0	NA	NA	NA	NA	NA	no
Gm5830	1	78967637	ENSMUSG00000072978	predicted pseudogene 5830 [Source:MGI Symbol;Acc:MGI:3647375]	0	0	0	0	0	0	0	0	0	0	NA	NA	NA	NA	NA	no	0	NA	NA	NA	NA	NA	no	0	NA	NA	NA	NA	NA	no
Scg2	1	79434669	ENSMUSG00000050711	secretogranin II [Source:MGI Symbol;Acc:MGI:103033]	0	0	85	0	0	0	1	0	0	9.57893	4.58605	2.37875	1.92792	NA	NA	no	9.57893	-0.624249	2.40064	-0.260035	NA	NA	no	9.57893	5.2103	2.38511	2.18451	NA	NA	no
Gm19027	1	79505803	ENSMUSG00000099562	predicted gene, 19027 [Source:MGI Symbol;Acc:MGI:5011212]	0	0	0	0	0	0	0	0	0	0	NA	NA	NA	NA	NA	no	0	NA	NA	NA	NA	NA	no	0	NA	NA	NA	NA	NA	no
Gm24160	1	79513739	ENSMUSG00000077782	predicted gene, 24160 [Source:MGI Symbol;Acc:MGI:5453937]	0	0	0	0	0	0	0	0	0	0	NA	NA	NA	NA	NA	no	0	NA	NA	NA	NA	NA	no	0	NA	NA	NA	NA	NA	no
Ap1s3	1	79606876	ENSMUSG00000054702	adaptor-related protein complex AP-1, sigma 3 [Source:MGI Symbol;Acc:MGI:1891304]	1	170	167	166	72	9	1	36	3	72.7783	3.33899	1.55806	2.14305	0.0321092	0.352814	no	72.7783	2.72106	1.5585	1.74595	0.0808188	0.64358	no	72.7783	0.617928	1.55093	0.398424	0.690318	1	no
Gm37886	1	79619522	ENSMUSG00000102235	predicted gene, 37886 [Source:MGI Symbol;Acc:MGI:5611114]	0	0	0	0	0	0	0	0	0	0	NA	NA	NA	NA	NA	no	0	NA	NA	NA	NA	NA	no	0	NA	NA	NA	NA	NA	no
Wdfy1	1	79702262	ENSMUSG00000073643	WD repeat and FYVE domain containing 1 [Source:MGI Symbol;Acc:MGI:1916618]	0	2	0	1	0	51	1	56	1	9.50969	-2.80409	2.12605	-1.31892	NA	NA	no	9.50969	0.107028	2.09908	0.0509881	NA	NA	no	9.50969	-2.91112	2.12653	-1.36895	NA	NA	no
Gm10555	1	79762717	ENSMUSG00000104497	predicted gene 10555 [Source:MGI Symbol;Acc:MGI:3642807]	0	0	0	0	0	0	0	0	0	0	NA	NA	NA	NA	NA	no	0	NA	NA	NA	NA	NA	no	0	NA	NA	NA	NA	NA	no
Mrpl44	1	79776018	ENSMUSG00000026248	mitochondrial ribosomal protein L44 [Source:MGI Symbol;Acc:MGI:1916413]	212	0	0	0	105	0	253	0	56	53.6382	-0.117396	2.33073	-0.0503689	0.959828	1	no	53.6382	-0.643795	2.33083	-0.276209	0.782388	1	no	53.6382	0.526399	2.33095	0.22583	0.821334	1	no
Serpine2	1	79794197	ENSMUSG00000026249	serine (or cysteine) peptidase inhibitor, clade E, member 2 [Source:MGI Symbol;Acc:MGI:101780]	0	0	1	0	0	0	58	24	41	10.0981	-5.20972	1.96903	-2.64583	0.00814899	0.167479	no	10.0981	-6.09966	1.97924	-3.08182	0.00205739	0.0845475	no	10.0981	0.889937	2.08566	0.426693	0.669603	1	no
Gm5529	1	79922536	ENSMUSG00000067106	predicted pseudogene 5529 [Source:MGI Symbol;Acc:MGI:3646377]	0	0	0	0	0	0	0	0	0	0	NA	NA	NA	NA	NA	no	0	NA	NA	NA	NA	NA	no	0	NA	NA	NA	NA	NA	no
Gm28071	1	79957580	ENSMUSG00000100397	predicted gene 28071 [Source:MGI Symbol;Acc:MGI:5578777]	0	0	0	0	0	0	0	0	0	0	NA	NA	NA	NA	NA	no	0	NA	NA	NA	NA	NA	no	0	NA	NA	NA	NA	NA	no
Gm28058	1	80098622	ENSMUSG00000099753	predicted gene 28058 [Source:MGI Symbol;Acc:MGI:5578764]	0	0	0	0	0	0	0	0	0	0	NA	NA	NA	NA	NA	no	0	NA	NA	NA	NA	NA	no	0	NA	NA	NA	NA	NA	no
Gm23934	1	80135466	ENSMUSG00000096297	predicted gene, 23934 [Source:MGI Symbol;Acc:MGI:5453711]	0	0	0	0	0	0	0	0	0	0	NA	NA	NA	NA	NA	no	0	NA	NA	NA	NA	NA	no	0	NA	NA	NA	NA	NA	no
Gm38339	1	80146973	ENSMUSG00000102518	predicted gene, 38339 [Source:MGI Symbol;Acc:MGI:5611567]	0	0	0	0	0	0	0	0	0	0	NA	NA	NA	NA	NA	no	0	NA	NA	NA	NA	NA	no	0	NA	NA	NA	NA	NA	no
9830004L10Rik	1	80184719	ENSMUSG00000099552	RIKEN cDNA 9830004L10 gene [Source:MGI Symbol;Acc:MGI:3642808]	0	0	0	0	0	0	0	0	0	0	NA	NA	NA	NA	NA	no	0	NA	NA	NA	NA	NA	no	0	NA	NA	NA	NA	NA	no
Fam124b	1	80198706	ENSMUSG00000043230	family with sequence similarity 124, member B [Source:MGI Symbol;Acc:MGI:3026880]	0	0	0	0	0	0	0	0	0	0	NA	NA	NA	NA	NA	no	0	NA	NA	NA	NA	NA	no	0	NA	NA	NA	NA	NA	no
2310015K22Rik	1	80225044	ENSMUSG00000101257	RIKEN cDNA 2310015K22 gene [Source:MGI Symbol;Acc:MGI:1916815]	0	0	0	0	0	0	0	0	0	0	NA	NA	NA	NA	NA	no	0	NA	NA	NA	NA	NA	no	0	NA	NA	NA	NA	NA	no
Gm37932	1	80255031	ENSMUSG00000103404	predicted gene, 37932 [Source:MGI Symbol;Acc:MGI:5611160]	0	0	0	0	0	0	0	0	0	0	NA	NA	NA	NA	NA	no	0	NA	NA	NA	NA	NA	no	0	NA	NA	NA	NA	NA	no
Cul3	1	80264923	ENSMUSG00000004364	cullin 3 [Source:MGI Symbol;Acc:MGI:1347360]	402	338	89	500	60	167	316	66	75	205.911	1.44016	1.03409	1.39268	0.163717	0.770634	no	205.911	1.12808	1.0342	1.09078	0.275369	1	no	205.911	0.312076	1.03324	0.302035	0.762625	1	no
Gm37902	1	80274731	ENSMUSG00000103076	predicted gene, 37902 [Source:MGI Symbol;Acc:MGI:5611130]	0	0	0	0	0	0	0	0	0	0	NA	NA	NA	NA	NA	no	0	NA	NA	NA	NA	NA	no	0	NA	NA	NA	NA	NA	no
Gm37262	1	80326177	ENSMUSG00000103525	predicted gene, 37262 [Source:MGI Symbol;Acc:MGI:5610490]	0	0	0	0	0	0	0	0	0	0	NA	NA	NA	NA	NA	no	0	NA	NA	NA	NA	NA	no	0	NA	NA	NA	NA	NA	no
Gm29125	1	80382822	ENSMUSG00000101722	predicted gene 29125 [Source:MGI Symbol;Acc:MGI:5579831]	0	0	0	0	0	0	0	0	0	0	NA	NA	NA	NA	NA	no	0	NA	NA	NA	NA	NA	no	0	NA	NA	NA	NA	NA	no
Gm6189	1	80383104	ENSMUSG00000090637	predicted gene 6189 [Source:MGI Symbol;Acc:MGI:3643154]	0	0	0	0	0	0	0	0	0	0	NA	NA	NA	NA	NA	no	0	NA	NA	NA	NA	NA	no	0	NA	NA	NA	NA	NA	no
1700016L21Rik	1	80445932	ENSMUSG00000101483	RIKEN cDNA 1700016L21 gene [Source:MGI Symbol;Acc:MGI:1919458]	0	0	0	0	0	0	0	0	0	0	NA	NA	NA	NA	NA	no	0	NA	NA	NA	NA	NA	no	0	NA	NA	NA	NA	NA	no
Gm45261	1	80449597	ENSMUSG00000110100	predicted gene 45261 [Source:MGI Symbol;Acc:MGI:5791097]	0	0	0	0	0	0	0	0	0	0	NA	NA	NA	NA	NA	no	0	NA	NA	NA	NA	NA	no	0	NA	NA	NA	NA	NA	no
Dock10	1	80501073	ENSMUSG00000038608	dedicator of cytokinesis 10 [Source:MGI Symbol;Acc:MGI:2146320]	218	71	197	497	340	637	453	169	63	251.239	0.0994867	0.773759	0.128576	0.897693	1	no	251.239	1.56725	0.771958	2.03022	0.0423341	0.459931	no	251.239	-1.46776	0.772589	-1.89979	0.0574604	0.54606	no
Gm37645	1	80666009	ENSMUSG00000103192	predicted gene, 37645 [Source:MGI Symbol;Acc:MGI:5610873]	0	0	0	39	0	0	1	2	0	4.47014	-1.06463	2.39406	-0.444698	NA	NA	no	4.47014	2.8915	2.37171	1.21916	NA	NA	no	4.47014	-3.95613	2.38574	-1.65824	NA	NA	no
Gm38062	1	80728809	ENSMUSG00000104488	predicted gene, 38062 [Source:MGI Symbol;Acc:MGI:5611290]	32	0	4	0	153	0	0	277	0	40.7388	-1.60387	2.34137	-0.685014	NA	NA	no	40.7388	-0.239291	2.34064	-0.102233	NA	NA	no	40.7388	-1.36458	2.34149	-0.582782	NA	NA	no
A630081D01Rik	1	80747222	ENSMUSG00000102721	RIKEN cDNA A630081D01 gene [Source:MGI Symbol;Acc:MGI:2138649]	85	0	0	0	0	0	0	7	0	8.50663	2.7292	2.36499	1.154	NA	NA	no	8.50663	-1.80457	2.38666	-0.756107	NA	NA	no	8.50663	4.53377	2.38256	1.9029	NA	NA	no
Gm29124	1	80897654	ENSMUSG00000099949	predicted gene 29124 [Source:MGI Symbol;Acc:MGI:5579830]	0	0	0	0	0	0	0	0	0	0	NA	NA	NA	NA	NA	no	0	NA	NA	NA	NA	NA	no	0	NA	NA	NA	NA	NA	no
Gm28066	1	80949426	ENSMUSG00000099918	predicted gene 28066 [Source:MGI Symbol;Acc:MGI:5578772]	0	0	0	0	0	0	0	0	0	0	NA	NA	NA	NA	NA	no	0	NA	NA	NA	NA	NA	no	0	NA	NA	NA	NA	NA	no
Nyap2	1	81076950	ENSMUSG00000054976	neuronal tyrosine-phophorylated phosphoinositide 3-kinase adaptor 2 [Source:MGI Symbol;Acc:MGI:2443135]	0	0	0	0	0	0	0	0	0	0	NA	NA	NA	NA	NA	no	0	NA	NA	NA	NA	NA	no	0	NA	NA	NA	NA	NA	no
Gm37210	1	81520338	ENSMUSG00000104029	predicted gene, 37210 [Source:MGI Symbol;Acc:MGI:5610438]	0	0	0	0	0	0	0	0	0	0	NA	NA	NA	NA	NA	no	0	NA	NA	NA	NA	NA	no	0	NA	NA	NA	NA	NA	no
Gm6198	1	81554157	ENSMUSG00000101986	predicted gene 6198 [Source:MGI Symbol;Acc:MGI:3644461]	0	0	0	0	0	0	0	0	0	0	NA	NA	NA	NA	NA	no	0	NA	NA	NA	NA	NA	no	0	NA	NA	NA	NA	NA	no
Gm5530	1	81741985	ENSMUSG00000087008	predicted gene 5530 [Source:MGI Symbol;Acc:MGI:3646374]	0	0	0	0	0	0	0	0	0	0	NA	NA	NA	NA	NA	no	0	NA	NA	NA	NA	NA	no	0	NA	NA	NA	NA	NA	no
Gm7516	1	81797241	ENSMUSG00000100561	predicted gene 7516 [Source:MGI Symbol;Acc:MGI:3643007]	0	0	0	0	0	1	15	0	45	5.89668	-4.32739	2.38518	-1.81428	0.0696343	NA	no	5.89668	-3.827	2.38054	-1.60762	0.107918	NA	no	5.89668	-0.500391	2.40207	-0.208317	0.834982	NA	no
Gm37114	1	82105180	ENSMUSG00000103571	predicted gene, 37114 [Source:MGI Symbol;Acc:MGI:5610342]	0	0	0	0	0	0	0	0	0	0	NA	NA	NA	NA	NA	no	0	NA	NA	NA	NA	NA	no	0	NA	NA	NA	NA	NA	no
Mir6344	1	82131916	ENSMUSG00000098797	microRNA 6344 [Source:MGI Symbol;Acc:MGI:5531222]	0	0	0	0	0	0	0	0	0	0	NA	NA	NA	NA	NA	no	0	NA	NA	NA	NA	NA	no	0	NA	NA	NA	NA	NA	no
Irs1	1	82233101	ENSMUSG00000055980	insulin receptor substrate 1 [Source:MGI Symbol;Acc:MGI:99454]	0	1	0	0	0	0	0	0	0	0.142558	0.863238	2.40591	0.358799	0.719746	NA	no	0.142558	0	2.40591	0	1	NA	no	0.142558	0.659364	2.40591	0.27406	0.784039	NA	no
Gm9747	1	82233112	ENSMUSG00000022591	predicted gene 9747 [Source:MGI Symbol;Acc:MGI:3710571]	0	0	0	0	0	0	0	0	0	0	NA	NA	NA	NA	NA	no	0	NA	NA	NA	NA	NA	no	0	NA	NA	NA	NA	NA	no
Rhbdd1	1	82316452	ENSMUSG00000026142	rhomboid domain containing 1 [Source:MGI Symbol;Acc:MGI:1924117]	129	106	1	149	0	25	0	0	1	46.0056	6.08691	1.89405	3.2137	0.00131035	0.0586522	no	46.0056	5.6053	1.89436	2.95894	0.00308699	0.105272	no	46.0056	0.481604	1.83125	0.262992	0.792556	1	no
Gm19552	1	82352217	ENSMUSG00000104493	predicted gene, 19552 [Source:MGI Symbol;Acc:MGI:5011737]	60	0	165	0	115	0	0	0	0	36.4231	4.33315	2.33074	1.85913	0.0630087	0.495858	no	36.4231	3.61868	2.33095	1.55245	0.120554	0.770771	no	36.4231	0.714471	2.32494	0.307308	0.758609	1	no
Gm28940	1	82392493	ENSMUSG00000100786	predicted gene 28940 [Source:MGI Symbol;Acc:MGI:5579646]	0	0	0	0	0	0	0	0	0	0	NA	NA	NA	NA	NA	no	0	NA	NA	NA	NA	NA	no	0	NA	NA	NA	NA	NA	no
Gm22112	1	82396697	ENSMUSG00000096779	predicted gene, 22112 [Source:MGI Symbol;Acc:MGI:5451889]	0	0	0	0	0	0	0	0	0	0	NA	NA	NA	NA	NA	no	0	NA	NA	NA	NA	NA	no	0	NA	NA	NA	NA	NA	no
Col4a4	1	82448423	ENSMUSG00000067158	collagen, type IV, alpha 4 [Source:MGI Symbol;Acc:MGI:104687]	0	0	0	0	0	0	0	0	0	0	NA	NA	NA	NA	NA	no	0	NA	NA	NA	NA	NA	no	0	NA	NA	NA	NA	NA	no
Col4a3	1	82586921	ENSMUSG00000079465	collagen, type IV, alpha 3 [Source:MGI Symbol;Acc:MGI:104688]	0	0	0	0	0	0	0	0	0	0	NA	NA	NA	NA	NA	no	0	NA	NA	NA	NA	NA	no	0	NA	NA	NA	NA	NA	no
n-R5s213	1	82635013	ENSMUSG00000065055	nuclear encoded rRNA 5S 213 [Source:MGI Symbol;Acc:MGI:4422078]	0	0	0	0	0	0	0	0	0	0	NA	NA	NA	NA	NA	no	0	NA	NA	NA	NA	NA	no	0	NA	NA	NA	NA	NA	no
C430014B12Rik	1	82691928	ENSMUSG00000097564	RIKEN cDNA C430014B12 gene [Source:MGI Symbol;Acc:MGI:2444820]	0	0	0	0	0	0	0	0	0	0	NA	NA	NA	NA	NA	no	0	NA	NA	NA	NA	NA	no	0	NA	NA	NA	NA	NA	no
Mff	1	82724890	ENSMUSG00000026150	mitochondrial fission factor [Source:MGI Symbol;Acc:MGI:1922984]	115	3	116	32	0	171	0	14	10	45.6489	2.9469	1.7558	1.67838	0.093273	0.59538	no	45.6489	2.66566	1.75593	1.5181	0.12899	0.797099	no	45.6489	0.281237	1.74868	0.160828	0.872229	1	no
Gm28941	1	82739691	ENSMUSG00000101450	predicted gene 28941 [Source:MGI Symbol;Acc:MGI:5579647]	0	0	0	0	0	0	0	0	0	0	NA	NA	NA	NA	NA	no	0	NA	NA	NA	NA	NA	no	0	NA	NA	NA	NA	NA	no
Tm4sf20	1	82756649	ENSMUSG00000026149	transmembrane 4 L six family member 20 [Source:MGI Symbol;Acc:MGI:1913511]	0	0	0	0	0	0	0	0	0	0	NA	NA	NA	NA	NA	no	0	NA	NA	NA	NA	NA	no	0	NA	NA	NA	NA	NA	no
AC138214.1	1	82770824	ENSMUSG00000114299		0	0	0	0	0	0	0	0	0	0	NA	NA	NA	NA	NA	no	0	NA	NA	NA	NA	NA	no	0	NA	NA	NA	NA	NA	no
Gm19257	1	82777028	ENSMUSG00000099771	predicted gene, 19257 [Source:MGI Symbol;Acc:MGI:5011442]	0	0	0	0	0	0	0	0	0	0	NA	NA	NA	NA	NA	no	0	NA	NA	NA	NA	NA	no	0	NA	NA	NA	NA	NA	no
Gm36999	1	82806423	ENSMUSG00000102280	predicted gene, 36999 [Source:MGI Symbol;Acc:MGI:5610227]	0	0	0	0	86	0	0	0	0	9.21554	0	2.40591	0	NA	NA	no	9.21554	5.56146	2.38511	2.33174	NA	NA	no	9.21554	-5.43808	2.38511	-2.28001	NA	NA	no
Gm28942	1	82819835	ENSMUSG00000100170	predicted gene 28942 [Source:MGI Symbol;Acc:MGI:5579648]	0	0	0	0	0	0	0	0	0	0	NA	NA	NA	NA	NA	no	0	NA	NA	NA	NA	NA	no	0	NA	NA	NA	NA	NA	no
Gm17764	1	82822471	ENSMUSG00000100744	predicted gene, 17764 [Source:MGI Symbol;Acc:MGI:5009928]	0	0	0	0	0	0	0	0	0	0	NA	NA	NA	NA	NA	no	0	NA	NA	NA	NA	NA	no	0	NA	NA	NA	NA	NA	no
Gm22396	1	82839446	ENSMUSG00000093782	predicted gene, 22396 [Source:MGI Symbol;Acc:MGI:5452173]	0	0	0	0	0	0	0	0	0	0	NA	NA	NA	NA	NA	no	0	NA	NA	NA	NA	NA	no	0	NA	NA	NA	NA	NA	no
Agfg1	1	82839483	ENSMUSG00000026159	ArfGAP with FG repeats 1 [Source:MGI Symbol;Acc:MGI:1333754]	374	438	318	257	265	105	691	916	534	370.666	-0.357543	0.681795	-0.524414	0.599991	1	no	370.666	-1.34656	0.68273	-1.97231	0.0485743	0.490134	no	370.666	0.989012	0.683277	1.44745	0.14777	0.849704	no
AC125444.3	1	82913325	ENSMUSG00000113880		0	0	0	0	0	0	0	0	0	0	NA	NA	NA	NA	NA	no	0	NA	NA	NA	NA	NA	no	0	NA	NA	NA	NA	NA	no
AC125444.5	1	82924917	ENSMUSG00000113973		0	0	0	0	0	0	0	0	0	0	NA	NA	NA	NA	NA	no	0	NA	NA	NA	NA	NA	no	0	NA	NA	NA	NA	NA	no
AC125444.2	1	82930571	ENSMUSG00000113846		0	0	0	0	0	0	0	0	0	0	NA	NA	NA	NA	NA	no	0	NA	NA	NA	NA	NA	no	0	NA	NA	NA	NA	NA	no
AC125444.1	1	82942559	ENSMUSG00000113084		0	0	0	0	0	0	0	0	0	0	NA	NA	NA	NA	NA	no	0	NA	NA	NA	NA	NA	no	0	NA	NA	NA	NA	NA	no
AC125444.4	1	82955186	ENSMUSG00000113925		0	0	0	0	0	0	0	0	0	0	NA	NA	NA	NA	NA	no	0	NA	NA	NA	NA	NA	no	0	NA	NA	NA	NA	NA	no
AC125444.6	1	82960286	ENSMUSG00000114011		0	0	0	0	0	0	0	0	0	0	NA	NA	NA	NA	NA	no	0	NA	NA	NA	NA	NA	no	0	NA	NA	NA	NA	NA	no
AC161180.1	1	83000548	ENSMUSG00000113097		0	0	0	0	0	0	0	0	0	0	NA	NA	NA	NA	NA	no	0	NA	NA	NA	NA	NA	no	0	NA	NA	NA	NA	NA	no
Gm7553	1	83003482	ENSMUSG00000101784	predicted gene 7553 [Source:MGI Symbol;Acc:MGI:3826364]	0	0	0	0	0	0	0	0	0	0	NA	NA	NA	NA	NA	no	0	NA	NA	NA	NA	NA	no	0	NA	NA	NA	NA	NA	no
Slc19a3	1	83012523	ENSMUSG00000038496	solute carrier family 19, member 3 [Source:MGI Symbol;Acc:MGI:1931307]	0	0	0	0	0	0	0	0	0	0	NA	NA	NA	NA	NA	no	0	NA	NA	NA	NA	NA	no	0	NA	NA	NA	NA	NA	no
Gm7539	1	83015393	ENSMUSG00000100432	predicted gene 7539 [Source:MGI Symbol;Acc:MGI:3647619]	2	3	0	0	0	0	0	0	0	0.615407	2.41793	2.39552	1.00935	0.312804	NA	no	0.615407	0	2.40591	0	1	NA	no	0.615407	2.21406	2.39552	0.924248	0.355357	NA	no
Krtap28-10	1	83041524	ENSMUSG00000100190	keratin associated protein 28-10 [Source:MGI Symbol;Acc:MGI:3779575]	0	0	0	0	0	0	0	0	0	0	NA	NA	NA	NA	NA	no	0	NA	NA	NA	NA	NA	no	0	NA	NA	NA	NA	NA	no
AC161180.2	1	83044932	ENSMUSG00000113267		0	0	0	0	0	0	0	0	0	0	NA	NA	NA	NA	NA	no	0	NA	NA	NA	NA	NA	no	0	NA	NA	NA	NA	NA	no
A030005K14Rik	1	83058286	ENSMUSG00000104423	RIKEN cDNA A030005K14 gene [Source:MGI Symbol;Acc:MGI:1925171]	0	0	0	0	0	0	0	0	0	0	NA	NA	NA	NA	NA	no	0	NA	NA	NA	NA	NA	no	0	NA	NA	NA	NA	NA	no
Krtap28-13	1	83060930	ENSMUSG00000101315	keratin associated protein 28-13 [Source:MGI Symbol;Acc:MGI:1918636]	0	0	0	0	0	0	0	0	0	0	NA	NA	NA	NA	NA	no	0	NA	NA	NA	NA	NA	no	0	NA	NA	NA	NA	NA	no
Gm29518	1	83067102	ENSMUSG00000099691	predicted gene 29518 [Source:MGI Symbol;Acc:MGI:5580224]	0	0	0	0	0	0	0	0	0	0	NA	NA	NA	NA	NA	no	0	NA	NA	NA	NA	NA	no	0	NA	NA	NA	NA	NA	no
Ccl20	1	83116766	ENSMUSG00000026166	chemokine (C-C motif) ligand 20 [Source:MGI Symbol;Acc:MGI:1329031]	0	0	0	0	0	0	0	0	0	0	NA	NA	NA	NA	NA	no	0	NA	NA	NA	NA	NA	no	0	NA	NA	NA	NA	NA	no
Gm29519	1	83157984	ENSMUSG00000101173	predicted gene 29519 [Source:MGI Symbol;Acc:MGI:5580225]	0	0	0	0	0	0	0	0	0	0	NA	NA	NA	NA	NA	no	0	NA	NA	NA	NA	NA	no	0	NA	NA	NA	NA	NA	no
Daw1	1	83159752	ENSMUSG00000053161	dynein assembly factor with WDR repeat domains 1 [Source:MGI Symbol;Acc:MGI:1923089]	0	0	0	0	0	0	0	0	0	0	NA	NA	NA	NA	NA	no	0	NA	NA	NA	NA	NA	no	0	NA	NA	NA	NA	NA	no
Gm6244	1	83212044	ENSMUSG00000101896	predicted gene 6244 [Source:MGI Symbol;Acc:MGI:3643858]	0	0	0	0	0	0	0	0	0	0	NA	NA	NA	NA	NA	no	0	NA	NA	NA	NA	NA	no	0	NA	NA	NA	NA	NA	no
n-R5s214	1	83216671	ENSMUSG00000084443	nuclear encoded rRNA 5S 214 [Source:MGI Symbol;Acc:MGI:4422079]	0	0	0	0	0	0	0	0	0	0	NA	NA	NA	NA	NA	no	0	NA	NA	NA	NA	NA	no	0	NA	NA	NA	NA	NA	no
Sphkap	1	83254139	ENSMUSG00000026163	SPHK1 interactor, AKAP domain containing [Source:MGI Symbol;Acc:MGI:1924879]	0	0	0	0	0	0	0	0	0	0	NA	NA	NA	NA	NA	no	0	NA	NA	NA	NA	NA	no	0	NA	NA	NA	NA	NA	no
Gm6374	1	83314513	ENSMUSG00000079140	predicted gene 6374 [Source:MGI Symbol;Acc:MGI:3647016]	0	0	0	0	0	0	0	0	0	0	NA	NA	NA	NA	NA	no	0	NA	NA	NA	NA	NA	no	0	NA	NA	NA	NA	NA	no
Gm37517	1	83331298	ENSMUSG00000104374	predicted gene, 37517 [Source:MGI Symbol;Acc:MGI:5610745]	0	0	0	0	0	0	0	0	0	0	NA	NA	NA	NA	NA	no	0	NA	NA	NA	NA	NA	no	0	NA	NA	NA	NA	NA	no
Gm37989	1	83426596	ENSMUSG00000104219	predicted gene, 37989 [Source:MGI Symbol;Acc:MGI:5611217]	0	0	0	0	0	0	0	0	0	0	NA	NA	NA	NA	NA	no	0	NA	NA	NA	NA	NA	no	0	NA	NA	NA	NA	NA	no
4933436I20Rik	1	83659550	ENSMUSG00000100580	RIKEN cDNA 4933436I20 gene [Source:MGI Symbol;Acc:MGI:1918540]	0	0	0	0	0	0	0	0	0	0	NA	NA	NA	NA	NA	no	0	NA	NA	NA	NA	NA	no	0	NA	NA	NA	NA	NA	no
Gm25754	1	83795912	ENSMUSG00000094946	predicted gene, 25754 [Source:MGI Symbol;Acc:MGI:5455531]	0	0	0	0	0	0	0	0	0	0	NA	NA	NA	NA	NA	no	0	NA	NA	NA	NA	NA	no	0	NA	NA	NA	NA	NA	no
Gm24555	1	83921918	ENSMUSG00000077736	predicted gene, 24555 [Source:MGI Symbol;Acc:MGI:5454332]	0	0	0	0	0	0	0	0	0	0	NA	NA	NA	NA	NA	no	0	NA	NA	NA	NA	NA	no	0	NA	NA	NA	NA	NA	no
Pid1	1	84036296	ENSMUSG00000045658	phosphotyrosine interaction domain containing 1 [Source:MGI Symbol;Acc:MGI:2138391]	134	0	0	0	0	86	0	0	0	20.5363	3.81239	2.36476	1.61217	NA	NA	no	20.5363	3.338	2.36492	1.41147	NA	NA	no	20.5363	0.474394	2.35906	0.201095	NA	NA	no
Gm37058	1	84132867	ENSMUSG00000102750	predicted gene, 37058 [Source:MGI Symbol;Acc:MGI:5610286]	0	0	0	0	0	0	0	0	0	0	NA	NA	NA	NA	NA	no	0	NA	NA	NA	NA	NA	no	0	NA	NA	NA	NA	NA	no
Gm18304	1	84168188	ENSMUSG00000101934	predicted gene, 18304 [Source:MGI Symbol;Acc:MGI:5010489]	0	0	0	0	0	0	0	0	0	0	NA	NA	NA	NA	NA	no	0	NA	NA	NA	NA	NA	no	0	NA	NA	NA	NA	NA	no
Mir6353	1	84218849	ENSMUSG00000098851	microRNA 6353 [Source:MGI Symbol;Acc:MGI:5530773]	0	0	0	0	0	0	0	0	0	0	NA	NA	NA	NA	NA	no	0	NA	NA	NA	NA	NA	no	0	NA	NA	NA	NA	NA	no
Dner	1	84369839	ENSMUSG00000036766	delta/notch-like EGF repeat containing [Source:MGI Symbol;Acc:MGI:2152889]	0	0	0	0	0	0	0	0	0	0	NA	NA	NA	NA	NA	no	0	NA	NA	NA	NA	NA	no	0	NA	NA	NA	NA	NA	no
Gm37959	1	84392503	ENSMUSG00000104396	predicted gene, 37959 [Source:MGI Symbol;Acc:MGI:5611187]	0	0	0	0	0	0	0	0	0	0	NA	NA	NA	NA	NA	no	0	NA	NA	NA	NA	NA	no	0	NA	NA	NA	NA	NA	no
Gm37925	1	84665189	ENSMUSG00000102481	predicted gene, 37925 [Source:MGI Symbol;Acc:MGI:5611153]	0	0	0	0	0	0	0	0	0	0	NA	NA	NA	NA	NA	no	0	NA	NA	NA	NA	NA	no	0	NA	NA	NA	NA	NA	no
Mir5126	1	84695839	ENSMUSG00000093254	microRNA 5126 [Source:MGI Symbol;Acc:MGI:4950451]	0	0	0	0	0	0	0	0	0	0	NA	NA	NA	NA	NA	no	0	NA	NA	NA	NA	NA	no	0	NA	NA	NA	NA	NA	no
Trip12	1	84721189	ENSMUSG00000026219	thyroid hormone receptor interactor 12 [Source:MGI Symbol;Acc:MGI:1309481]	303	896	618	79	634	725	1428	139	530	529.342	0.46644	1.06022	0.439948	0.659975	1	no	529.342	-0.150821	1.06037	-0.142235	0.886895	1	no	529.342	0.617261	1.06037	0.582116	0.560488	1	no
Gm38374	1	84807158	ENSMUSG00000103505	predicted gene, 38374 [Source:MGI Symbol;Acc:MGI:5611602]	0	0	0	0	0	0	0	1	0	0.0754234	-0.270919	2.40591	-0.112606	0.910343	NA	no	0.0754234	-0.363204	2.40591	-0.150963	0.880005	NA	no	0.0754234	0	2.40591	0	1	NA	no
Gm37738	1	84819968	ENSMUSG00000104503	predicted gene, 37738 [Source:MGI Symbol;Acc:MGI:5610966]	0	0	0	0	0	0	0	0	0	0	NA	NA	NA	NA	NA	no	0	NA	NA	NA	NA	NA	no	0	NA	NA	NA	NA	NA	no
Fbxo36	1	84839841	ENSMUSG00000073633	F-box protein 36 [Source:MGI Symbol;Acc:MGI:1289192]	0	0	0	0	0	0	0	0	0	0	NA	NA	NA	NA	NA	no	0	NA	NA	NA	NA	NA	no	0	NA	NA	NA	NA	NA	no
Slc16a14	1	84905898	ENSMUSG00000026220	solute carrier family 16 (monocarboxylic acid transporters), member 14 [Source:MGI Symbol;Acc:MGI:1919031]	0	0	0	0	0	0	0	0	0	0	NA	NA	NA	NA	NA	no	0	NA	NA	NA	NA	NA	no	0	NA	NA	NA	NA	NA	no
Gm15433	1	84963669	ENSMUSG00000096802	predicted pseudogene 15433 [Source:MGI Symbol;Acc:MGI:3705860]	0	0	0	0	0	0	0	0	0	0	NA	NA	NA	NA	NA	no	0	NA	NA	NA	NA	NA	no	0	NA	NA	NA	NA	NA	no
Gm29284	1	84990638	ENSMUSG00000099693	predicted gene 29284 [Source:MGI Symbol;Acc:MGI:5579990]	0	0	0	0	0	0	0	0	0	0	NA	NA	NA	NA	NA	no	0	NA	NA	NA	NA	NA	no	0	NA	NA	NA	NA	NA	no
C130026I21Rik	1	84992690	ENSMUSG00000052477	RIKEN cDNA C130026I21 gene [Source:MGI Symbol;Acc:MGI:3612702]	0	0	0	0	0	0	0	1	0	0.0754234	-0.270919	2.40591	-0.112606	0.910343	NA	no	0.0754234	-0.363204	2.40591	-0.150963	0.880005	NA	no	0.0754234	0	2.40591	0	1	NA	no
Rpl19-ps1	1	85012114	ENSMUSG00000064281	ribosomal protein L19, pseudogene 1 [Source:MGI Symbol;Acc:MGI:3642668]	112	1	0	281	0	3	1	308	4	65.3096	-0.872202	2.06922	-0.421512	NA	NA	no	65.3096	0.297668	2.06833	0.143917	NA	NA	no	65.3096	-1.16987	2.06923	-0.565365	NA	NA	no
Gm27907	1	85012367	ENSMUSG00000098842	predicted gene, 27907 [Source:MGI Symbol;Acc:MGI:5531289]	0	0	0	0	0	0	0	0	0	0	NA	NA	NA	NA	NA	no	0	NA	NA	NA	NA	NA	no	0	NA	NA	NA	NA	NA	no
Gm7582	1	85027954	ENSMUSG00000061852	predicted gene 7582 [Source:MGI Symbol;Acc:MGI:3643856]	0	0	0	0	0	0	0	0	0	0	NA	NA	NA	NA	NA	no	0	NA	NA	NA	NA	NA	no	0	NA	NA	NA	NA	NA	no
Gm2389	1	85061154	ENSMUSG00000089976	predicted pseudogene 2389 [Source:MGI Symbol;Acc:MGI:3780557]	0	0	0	0	0	0	0	0	0	0	NA	NA	NA	NA	NA	no	0	NA	NA	NA	NA	NA	no	0	NA	NA	NA	NA	NA	no
Gm18342	1	85067394	ENSMUSG00000101279	predicted gene, 18342 [Source:MGI Symbol;Acc:MGI:5010527]	0	0	0	0	0	0	0	0	0	0	NA	NA	NA	NA	NA	no	0	NA	NA	NA	NA	NA	no	0	NA	NA	NA	NA	NA	no
A530032D15Rik	1	85083069	ENSMUSG00000089844	RIKEN cDNA A530032D15Rik gene [Source:MGI Symbol;Acc:MGI:3037746]	0	0	0	0	0	0	0	0	0	0	NA	NA	NA	NA	NA	no	0	NA	NA	NA	NA	NA	no	0	NA	NA	NA	NA	NA	no
Gm10553	1	85100164	ENSMUSG00000073631	predicted gene 10553 [Source:MGI Symbol;Acc:MGI:3642178]	0	0	0	0	0	0	0	0	0	0	NA	NA	NA	NA	NA	no	0	NA	NA	NA	NA	NA	no	0	NA	NA	NA	NA	NA	no
A530040E14Rik	1	85105946	ENSMUSG00000072109	RIKEN cDNA A530040E14 gene [Source:MGI Symbol;Acc:MGI:3612703]	0	0	0	0	0	0	0	0	0	0	NA	NA	NA	NA	NA	no	0	NA	NA	NA	NA	NA	no	0	NA	NA	NA	NA	NA	no
Gm16038	1	85115319	ENSMUSG00000090128	predicted gene 16038 [Source:MGI Symbol;Acc:MGI:3802117]	0	0	0	0	0	0	0	0	0	0	NA	NA	NA	NA	NA	no	0	NA	NA	NA	NA	NA	no	0	NA	NA	NA	NA	NA	no
Gm2619	1	85156809	ENSMUSG00000091199	predicted gene 2619 [Source:MGI Symbol;Acc:MGI:3780787]	0	0	0	0	0	0	0	0	0	0	NA	NA	NA	NA	NA	no	0	NA	NA	NA	NA	NA	no	0	NA	NA	NA	NA	NA	no
Gm6264	1	85159764	ENSMUSG00000089716	predicted gene 6264 [Source:MGI Symbol;Acc:MGI:3779580]	0	0	0	0	0	0	0	0	0	0	NA	NA	NA	NA	NA	no	0	NA	NA	NA	NA	NA	no	0	NA	NA	NA	NA	NA	no
Gm7609	1	85199613	ENSMUSG00000079457	predicted pseudogene 7609 [Source:MGI Symbol;Acc:MGI:3644536]	0	0	0	0	0	0	0	0	0	0	NA	NA	NA	NA	NA	no	0	NA	NA	NA	NA	NA	no	0	NA	NA	NA	NA	NA	no
Gm16028	1	85246851	ENSMUSG00000090252	predicted gene 16028 [Source:MGI Symbol;Acc:MGI:3801982]	0	0	0	0	0	0	0	0	0	0	NA	NA	NA	NA	NA	no	0	NA	NA	NA	NA	NA	no	0	NA	NA	NA	NA	NA	no
Gm16026	1	85266698	ENSMUSG00000079455	predicted pseudogene 16026 [Source:MGI Symbol;Acc:MGI:3783243]	0	0	0	0	0	0	0	0	0	0	NA	NA	NA	NA	NA	no	0	NA	NA	NA	NA	NA	no	0	NA	NA	NA	NA	NA	no
Gm16025	1	85326729	ENSMUSG00000089652	predicted gene 16025 [Source:MGI Symbol;Acc:MGI:3802144]	0	0	0	0	0	0	0	0	0	0	NA	NA	NA	NA	NA	no	0	NA	NA	NA	NA	NA	no	0	NA	NA	NA	NA	NA	no
Gm7281	1	85332716	ENSMUSG00000089937	predicted gene 7281 [Source:MGI Symbol;Acc:MGI:3779713]	0	0	0	0	0	0	0	0	0	0	NA	NA	NA	NA	NA	no	0	NA	NA	NA	NA	NA	no	0	NA	NA	NA	NA	NA	no
Gm2666	1	85484252	ENSMUSG00000096292	predicted gene 2666 [Source:MGI Symbol;Acc:MGI:3780835]	0	0	0	0	0	0	0	0	0	0	NA	NA	NA	NA	NA	no	0	NA	NA	NA	NA	NA	no	0	NA	NA	NA	NA	NA	no
Gm2427	1	85501090	ENSMUSG00000101751	predicted gene 2427 [Source:MGI Symbol;Acc:MGI:3780593]	0	0	0	0	0	0	0	0	0	0	NA	NA	NA	NA	NA	no	0	NA	NA	NA	NA	NA	no	0	NA	NA	NA	NA	NA	no
Gm16092	1	85511133	ENSMUSG00000089714	predicted gene 16092 [Source:MGI Symbol;Acc:MGI:3841241]	0	0	0	0	0	0	0	0	0	0	NA	NA	NA	NA	NA	no	0	NA	NA	NA	NA	NA	no	0	NA	NA	NA	NA	NA	no
Gm7592	1	85526690	ENSMUSG00000090186	predicted gene 7592 [Source:MGI Symbol;Acc:MGI:3644077]	0	0	0	0	0	0	0	0	0	0	NA	NA	NA	NA	NA	no	0	NA	NA	NA	NA	NA	no	0	NA	NA	NA	NA	NA	no
G530012D18Rik	1	85575676	ENSMUSG00000094127	RIKEN cDNA G530012D1 gene [Source:MGI Symbol;Acc:MGI:3642025]	0	0	0	0	0	0	0	0	0	0	NA	NA	NA	NA	NA	no	0	NA	NA	NA	NA	NA	no	0	NA	NA	NA	NA	NA	no
Sp110	1	85576899	ENSMUSG00000070034	Sp110 nuclear body protein [Source:MGI Symbol;Acc:MGI:1923364]	157	71	207	225	244	236	785	397	177	220.619	-1.0385	0.672794	-1.54357	0.122693	0.682079	no	220.619	-0.456324	0.671395	-0.679666	0.496716	1	no	220.619	-0.582178	0.673637	-0.864232	0.387461	1	no
Gm16094	1	85599286	ENSMUSG00000090103	predicted gene 16094 [Source:MGI Symbol;Acc:MGI:3801967]	0	0	0	0	0	0	0	0	0	0	NA	NA	NA	NA	NA	no	0	NA	NA	NA	NA	NA	no	0	NA	NA	NA	NA	NA	no
Sp140	1	85600378	ENSMUSG00000070031	Sp140 nuclear body protein [Source:MGI Symbol;Acc:MGI:3702467]	0	39	0	0	0	49	221	0	0	24.4896	-0.891601	2.35876	-0.377995	NA	NA	no	24.4896	-1.06589	2.35876	-0.451884	NA	NA	no	24.4896	0.174287	2.3593	0.0738721	NA	NA	no
Gm10552	1	85604085	ENSMUSG00000073628	predicted gene 10552 [Source:MGI Symbol;Acc:MGI:3642083]	0	0	0	0	0	0	0	0	0	0	NA	NA	NA	NA	NA	no	0	NA	NA	NA	NA	NA	no	0	NA	NA	NA	NA	NA	no
Gm17017	1	85641222	ENSMUSG00000090246	predicted gene 17017 [Source:MGI Symbol;Acc:MGI:4820558]	0	0	0	0	0	0	0	0	0	0	NA	NA	NA	NA	NA	no	0	NA	NA	NA	NA	NA	no	0	NA	NA	NA	NA	NA	no
Sp100	1	85649988	ENSMUSG00000026222	nuclear antigen Sp100 [Source:MGI Symbol;Acc:MGI:109561]	1314	817	1064	773	532	1385	2527	2358	709	1046.9	-0.218123	0.628247	-0.347193	0.728446	1	no	1046.9	-0.624422	0.628334	-0.993774	0.320333	1	no	1046.9	0.406299	0.628529	0.646429	0.518001	1	no
n-R5s215	1	85674882	ENSMUSG00000064414	nuclear encoded rRNA 5S 215 [Source:MGI Symbol;Acc:MGI:4422080]	0	0	0	0	0	0	0	0	0	0	NA	NA	NA	NA	NA	no	0	NA	NA	NA	NA	NA	no	0	NA	NA	NA	NA	NA	no
A630001G21Rik	1	85717083	ENSMUSG00000052760	RIKEN cDNA A630001G21 gene [Source:MGI Symbol;Acc:MGI:2443131]	2	71	0	0	21	4	57	0	0	16.6427	1.0574	2.23152	0.473846	NA	NA	no	16.6427	-0.341362	2.23328	-0.152852	NA	NA	no	16.6427	1.39876	2.23265	0.626503	NA	NA	no
Mir8096	1	85751948	ENSMUSG00000098634	microRNA 8096 [Source:MGI Symbol;Acc:MGI:5530861]	0	0	0	0	0	0	0	0	0	0	NA	NA	NA	NA	NA	no	0	NA	NA	NA	NA	NA	no	0	NA	NA	NA	NA	NA	no
Gm25472	1	85763794	ENSMUSG00000094834	predicted gene, 25472 [Source:MGI Symbol;Acc:MGI:5455249]	0	0	0	0	0	0	0	0	0	0	NA	NA	NA	NA	NA	no	0	NA	NA	NA	NA	NA	no	0	NA	NA	NA	NA	NA	no
9930111H07Rik	1	85775271	ENSMUSG00000100217	RIKEN cDNA 9930111H07 gene [Source:MGI Symbol;Acc:MGI:1925012]	0	0	0	0	0	0	0	0	0	0	NA	NA	NA	NA	NA	no	0	NA	NA	NA	NA	NA	no	0	NA	NA	NA	NA	NA	no
Gm22906	1	85784713	ENSMUSG00000092932	predicted gene, 22906 [Source:MGI Symbol;Acc:MGI:5452683]	0	0	0	0	0	0	0	0	0	0	NA	NA	NA	NA	NA	no	0	NA	NA	NA	NA	NA	no	0	NA	NA	NA	NA	NA	no
Cab39	1	85793441	ENSMUSG00000036707	calcium binding protein 39 [Source:MGI Symbol;Acc:MGI:107438]	351	341	390	91	10	147	14	71	140	171.096	2.41964	1.11755	2.16513	0.0303778	0.340979	no	171.096	0.200197	1.11983	0.178775	0.858115	1	no	171.096	2.21945	1.11779	1.98557	0.0470808	0.497069	no
Itm2c	1	85894281	ENSMUSG00000026223	integral membrane protein 2C [Source:MGI Symbol;Acc:MGI:1927594]	1386	1025	1071	1534	1746	1653	1267	1023	1728	1248.53	0.196417	0.589618	0.333126	0.739039	1	no	1248.53	0.548441	0.589469	0.930398	0.352165	1	no	1248.53	-0.352024	0.589559	-0.597096	0.550443	1	no
4933407L21Rik	1	85928483	ENSMUSG00000026224	RIKEN cDNA 4933407L21 gene [Source:MGI Symbol;Acc:MGI:1918391]	0	0	0	0	0	0	0	0	0	0	NA	NA	NA	NA	NA	no	0	NA	NA	NA	NA	NA	no	0	NA	NA	NA	NA	NA	no
Gm28884	1	85933247	ENSMUSG00000099767	predicted gene 28884 [Source:MGI Symbol;Acc:MGI:5579590]	0	0	0	0	0	55	0	0	0	5.08953	0	2.40591	0	NA	NA	no	5.08953	5.1604	2.38589	2.16288	NA	NA	no	5.08953	-5.02575	2.38589	-2.10644	NA	NA	no
Gpr55	1	85938318	ENSMUSG00000049608	G protein-coupled receptor 55 [Source:MGI Symbol;Acc:MGI:2685064]	12	6	27	134	0	0	565	14	28	60.483	-2.5091	1.83751	-1.36549	0.1721	0.785628	no	60.483	-1.25001	1.83442	-0.681419	0.495606	1	no	60.483	-1.25909	1.83871	-0.684766	0.493492	1	no
Gm28100	1	85972365	ENSMUSG00000100108	predicted gene 28100 [Source:MGI Symbol;Acc:MGI:5578806]	0	0	0	0	0	0	0	0	0	0	NA	NA	NA	NA	NA	no	0	NA	NA	NA	NA	NA	no	0	NA	NA	NA	NA	NA	no
Gm18180	1	86014403	ENSMUSG00000099342	predicted gene, 18180 [Source:MGI Symbol;Acc:MGI:5010365]	0	0	0	0	0	0	0	0	0	0	NA	NA	NA	NA	NA	no	0	NA	NA	NA	NA	NA	no	0	NA	NA	NA	NA	NA	no
Spata3	1	86016816	ENSMUSG00000026226	spermatogenesis associated 3 [Source:MGI Symbol;Acc:MGI:1917310]	0	0	0	0	0	0	0	0	0	0	NA	NA	NA	NA	NA	no	0	NA	NA	NA	NA	NA	no	0	NA	NA	NA	NA	NA	no
2810459M11Rik	1	86045863	ENSMUSG00000026227	RIKEN cDNA 2810459M11 gene [Source:MGI Symbol;Acc:MGI:1920042]	0	0	0	0	0	0	0	0	0	0	NA	NA	NA	NA	NA	no	0	NA	NA	NA	NA	NA	no	0	NA	NA	NA	NA	NA	no
Psmd1	1	86064387	ENSMUSG00000026229	proteasome (prosome, macropain) 26S subunit, non-ATPase, 1 [Source:MGI Symbol;Acc:MGI:1917497]	27	38	235	127	270	92	160	599	0	141.154	-0.623881	1.51199	-0.412623	0.679883	1	no	141.154	-0.104334	1.51145	-0.0690289	0.944967	1	no	141.154	-0.519548	1.51221	-0.343568	0.731171	1	no
Gm22786	1	86087301	ENSMUSG00000077274	predicted gene, 22786 [Source:MGI Symbol;Acc:MGI:5452563]	0	0	0	0	0	0	0	0	0	0	NA	NA	NA	NA	NA	no	0	NA	NA	NA	NA	NA	no	0	NA	NA	NA	NA	NA	no
Htr2b	1	86099026	ENSMUSG00000026228	5-hydroxytryptamine (serotonin) receptor 2B [Source:MGI Symbol;Acc:MGI:109323]	0	0	0	0	0	0	0	0	0	0	NA	NA	NA	NA	NA	no	0	NA	NA	NA	NA	NA	no	0	NA	NA	NA	NA	NA	no
Gm37914	1	86120883	ENSMUSG00000103272	predicted gene, 37914 [Source:MGI Symbol;Acc:MGI:5611142]	0	0	0	0	0	25	0	0	0	2.31342	0	2.40591	0	NA	NA	no	2.31342	3.76338	2.38742	1.57634	NA	NA	no	2.31342	-3.46722	2.38742	-1.45229	NA	NA	no
Gm21972	1	86133637	ENSMUSG00000094638	predicted gene 21972 [Source:MGI Symbol;Acc:MGI:5439441]	0	0	0	0	0	0	0	0	0	0	NA	NA	NA	NA	NA	no	0	NA	NA	NA	NA	NA	no	0	NA	NA	NA	NA	NA	no
Armc9	1	86154780	ENSMUSG00000062590	armadillo repeat containing 9 [Source:MGI Symbol;Acc:MGI:1926045]	0	0	0	0	0	40	0	0	0	3.70147	0	2.40591	0	NA	NA	no	3.70147	4.24312	2.3863	1.77812	NA	NA	no	3.70147	-3.94696	2.3863	-1.65401	NA	NA	no
Gm16341	1	86275509	ENSMUSG00000087538	predicted gene 16341 [Source:MGI Symbol;Acc:MGI:3840137]	0	0	0	0	0	0	0	0	0	0	NA	NA	NA	NA	NA	no	0	NA	NA	NA	NA	NA	no	0	NA	NA	NA	NA	NA	no
B3gnt7	1	86302832	ENSMUSG00000079445	UDP-GlcNAc:betaGal beta-1,3-N-acetylglucosaminyltransferase 7 [Source:MGI Symbol;Acc:MGI:2384394]	0	0	0	0	0	0	0	0	0	0	NA	NA	NA	NA	NA	no	0	NA	NA	NA	NA	NA	no	0	NA	NA	NA	NA	NA	no
Gm28626	1	86303195	ENSMUSG00000099644	predicted gene 28626 [Source:MGI Symbol;Acc:MGI:5579332]	0	0	0	0	0	0	0	0	0	0	NA	NA	NA	NA	NA	no	0	NA	NA	NA	NA	NA	no	0	NA	NA	NA	NA	NA	no
Gm5258	1	86323267	ENSMUSG00000091806	predicted gene 5258 [Source:MGI Symbol;Acc:MGI:3647794]	0	0	0	0	0	0	0	0	0	0	NA	NA	NA	NA	NA	no	0	NA	NA	NA	NA	NA	no	0	NA	NA	NA	NA	NA	no
Gm28627	1	86328039	ENSMUSG00000101853	predicted gene 28627 [Source:MGI Symbol;Acc:MGI:5579333]	0	0	0	0	0	0	0	0	0	0	NA	NA	NA	NA	NA	no	0	NA	NA	NA	NA	NA	no	0	NA	NA	NA	NA	NA	no
Ncl	1	86344719	ENSMUSG00000026234	nucleolin [Source:MGI Symbol;Acc:MGI:97286]	3078	1332	1568	1282	1214	1729	3287	1927	1874	1644.71	0.221035	0.507266	0.435738	0.663027	1	no	1644.71	-0.378335	0.507386	-0.745656	0.455875	1	no	1644.71	0.599371	0.507446	1.18115	0.237542	1	no
Snora75	1	86351169	ENSMUSG00000064837	small nucleolar RNA, H/ACA box 75 [Source:MGI Symbol;Acc:MGI:3819511]	0	0	0	0	0	0	0	0	0	0	NA	NA	NA	NA	NA	no	0	NA	NA	NA	NA	NA	no	0	NA	NA	NA	NA	NA	no
Mir3535	1	86351981	ENSMUSG00000104627	microRNA 3535 [Source:MGI Symbol;Acc:MGI:5562722]	0	0	0	0	0	0	0	0	0	0	NA	NA	NA	NA	NA	no	0	NA	NA	NA	NA	NA	no	0	NA	NA	NA	NA	NA	no
Gm24148	1	86352008	ENSMUSG00000064696	predicted gene, 24148 [Source:MGI Symbol;Acc:MGI:5453925]	0	0	0	0	0	0	0	0	0	0	NA	NA	NA	NA	NA	no	0	NA	NA	NA	NA	NA	no	0	NA	NA	NA	NA	NA	no
Snord82	1	86356261	ENSMUSG00000064823	small nucleolar RNA, C/D box 82 [Source:MGI Symbol;Acc:MGI:1931502]	0	0	0	0	0	0	0	0	0	0	NA	NA	NA	NA	NA	no	0	NA	NA	NA	NA	NA	no	0	NA	NA	NA	NA	NA	no
C130036L24Rik	1	86359574	ENSMUSG00000073627	RIKEN cDNA C130036L24 gene [Source:MGI Symbol;Acc:MGI:2441877]	61	1	18	0	0	0	0	0	0	7.88311	5.87102	2.33419	2.51523	0.0118955	NA	no	7.88311	0	2.36664	0	1	1	no	7.88311	5.76254	2.33419	2.46876	0.0135583	0.26008	no
Gm45908	1	86377100	ENSMUSG00000110510	predicted gene 45908 [Source:MGI Symbol;Acc:MGI:5805023]	0	0	0	0	0	0	0	0	0	0	NA	NA	NA	NA	NA	no	0	NA	NA	NA	NA	NA	no	0	NA	NA	NA	NA	NA	no
Nmur1	1	86386303	ENSMUSG00000026237	neuromedin U receptor 1 [Source:MGI Symbol;Acc:MGI:1341898]	0	0	0	0	0	0	0	0	0	0	NA	NA	NA	NA	NA	no	0	NA	NA	NA	NA	NA	no	0	NA	NA	NA	NA	NA	no
Tex44	1	86426329	ENSMUSG00000036574	testis expressed 44 [Source:MGI Symbol;Acc:MGI:1919113]	0	0	0	0	0	0	0	0	0	0	NA	NA	NA	NA	NA	no	0	NA	NA	NA	NA	NA	no	0	NA	NA	NA	NA	NA	no
Rpl30-ps6	1	86473659	ENSMUSG00000101328	ribosomal protein L30, pseudogene 6 [Source:MGI Symbol;Acc:MGI:3642608]	2	1	2	0	1	0	0	1	0	0.736726	1.64966	2.39323	0.689305	0.490631	NA	no	0.736726	0.167664	2.40429	0.0697355	0.944404	NA	no	0.736726	1.482	2.39503	0.61878	0.536061	NA	no
Ptma	1	86526726	ENSMUSG00000026238	prothymosin alpha [Source:MGI Symbol;Acc:MGI:97803]	1621	763	1537	903	831	2075	2705	1763	1121	1241.94	0.0116921	0.591797	0.0197569	0.984237	1	no	1241.94	-0.17538	0.591801	-0.296349	0.766963	1	no	1241.94	0.187072	0.591926	0.316039	0.751973	1	no
Pde6d	1	86542994	ENSMUSG00000026239	phosphodiesterase 6D, cGMP-specific, rod, delta [Source:MGI Symbol;Acc:MGI:1270843]	54	125	3	118	170	1	2	23	244	82.4436	-0.235566	1.65166	-0.142624	0.886587	1	no	82.4436	0.134256	1.65113	0.0813121	0.935194	1	no	82.4436	-0.369823	1.65181	-0.22389	0.822843	1	no
Gm37152	1	86580058	ENSMUSG00000102927	predicted gene, 37152 [Source:MGI Symbol;Acc:MGI:5610380]	0	0	0	0	0	0	0	0	0	0	NA	NA	NA	NA	NA	no	0	NA	NA	NA	NA	NA	no	0	NA	NA	NA	NA	NA	no
Cops7b	1	86582904	ENSMUSG00000026240	COP9 signalosome subunit 7B [Source:MGI Symbol;Acc:MGI:1349388]	129	119	76	145	270	167	359	6	231	146.399	-0.35044	1.12804	-0.310664	0.756056	1	no	146.399	0.291425	1.12708	0.258567	0.795969	1	no	146.399	-0.641865	1.12806	-0.568999	0.569357	1	no
Gm22955	1	86637552	ENSMUSG00000084468	predicted gene, 22955 [Source:MGI Symbol;Acc:MGI:5452732]	0	0	0	0	0	0	0	0	0	0	NA	NA	NA	NA	NA	no	0	NA	NA	NA	NA	NA	no	0	NA	NA	NA	NA	NA	no
Gm37022	1	86638201	ENSMUSG00000103609	predicted gene, 37022 [Source:MGI Symbol;Acc:MGI:5610250]	0	0	0	0	0	0	0	0	0	0	NA	NA	NA	NA	NA	no	0	NA	NA	NA	NA	NA	no	0	NA	NA	NA	NA	NA	no
Nppc	1	86666291	ENSMUSG00000026241	natriuretic peptide type C [Source:MGI Symbol;Acc:MGI:97369]	0	0	0	0	0	0	0	0	0	0	NA	NA	NA	NA	NA	no	0	NA	NA	NA	NA	NA	no	0	NA	NA	NA	NA	NA	no
Dis3l2	1	86703808	ENSMUSG00000053333	DIS3 like 3'-5' exoribonuclease 2 [Source:MGI Symbol;Acc:MGI:2442555]	28	13	0	0	0	53	0	0	0	9.38597	3.39497	2.37139	1.43164	0.152248	0.748516	no	9.38597	3.48929	2.37111	1.47158	0.141134	0.831037	no	9.38597	-0.094319	2.36072	-0.0399535	0.96813	1	no
Gm29097	1	86764944	ENSMUSG00000100225	predicted gene 29097 [Source:MGI Symbol;Acc:MGI:5579803]	0	0	0	0	0	0	0	0	0	0	NA	NA	NA	NA	NA	no	0	NA	NA	NA	NA	NA	no	0	NA	NA	NA	NA	NA	no
Gm29055	1	86774819	ENSMUSG00000100768	predicted gene 29055 [Source:MGI Symbol;Acc:MGI:5579761]	0	0	0	0	2	0	0	0	0	0.214315	0	2.40591	0	1	NA	no	0.214315	1.3542	2.40551	0.562958	0.573464	NA	no	0.214315	-1.05804	2.40551	-0.439841	0.660052	NA	no
Gm37485	1	86801075	ENSMUSG00000104121	predicted gene, 37485 [Source:MGI Symbol;Acc:MGI:5610713]	0	0	0	0	0	0	0	0	0	0	NA	NA	NA	NA	NA	no	0	NA	NA	NA	NA	NA	no	0	NA	NA	NA	NA	NA	no
Gm38142	1	86826101	ENSMUSG00000102383	predicted gene, 38142 [Source:MGI Symbol;Acc:MGI:5611370]	0	0	0	0	0	0	0	0	0	0	NA	NA	NA	NA	NA	no	0	NA	NA	NA	NA	NA	no	0	NA	NA	NA	NA	NA	no
Gm38010	1	86834995	ENSMUSG00000104400	predicted gene, 38010 [Source:MGI Symbol;Acc:MGI:5611238]	0	0	0	0	0	0	0	0	0	0	NA	NA	NA	NA	NA	no	0	NA	NA	NA	NA	NA	no	0	NA	NA	NA	NA	NA	no
Gm37541	1	86874350	ENSMUSG00000102293	predicted gene, 37541 [Source:MGI Symbol;Acc:MGI:5610769]	0	0	0	0	0	0	0	0	0	0	NA	NA	NA	NA	NA	no	0	NA	NA	NA	NA	NA	no	0	NA	NA	NA	NA	NA	no
Gm38021	1	86893573	ENSMUSG00000102649	predicted gene, 38021 [Source:MGI Symbol;Acc:MGI:5611249]	54	0	29	46	0	40	5	0	28	20.3631	1.04632	1.97584	0.529557	0.596419	1	no	20.3631	1.10016	1.97542	0.556927	0.577578	1	no	20.3631	-0.0538421	1.97406	-0.0272748	0.978241	1	no
Gm6136	1	86908793	ENSMUSG00000084106	predicted pseudogene 6136 [Source:MGI Symbol;Acc:MGI:3646897]	73	21	67	4	8	0	10	4	3	19.9136	3.51129	1.23185	2.85043	0.00436605	0.122206	no	19.9136	0.00244246	1.27352	0.00191788	0.99847	1	no	19.9136	3.50885	1.24124	2.82689	0.00470019	0.147956	no
Gm37967	1	86917992	ENSMUSG00000102571	predicted gene, 37967 [Source:MGI Symbol;Acc:MGI:5611195]	0	0	0	0	3	0	0	0	0	0.321472	0	2.40591	0	1	NA	no	0.321472	1.77705	2.40067	0.740233	0.459159	NA	no	0.321472	-1.48089	2.40067	-0.616867	0.537322	NA	no
Gm28375	1	86929387	ENSMUSG00000099401	predicted gene 28375 [Source:MGI Symbol;Acc:MGI:5579081]	0	0	0	0	0	0	0	0	0	0	NA	NA	NA	NA	NA	no	0	NA	NA	NA	NA	NA	no	0	NA	NA	NA	NA	NA	no
Gm37017	1	86988270	ENSMUSG00000102956	predicted gene, 37017 [Source:MGI Symbol;Acc:MGI:5610245]	0	0	1	0	6	0	0	0	0	0.754872	0.863238	2.40591	0.358799	0.719746	NA	no	0.754872	2.42709	2.3933	1.01412	0.310527	NA	no	0.754872	-1.56385	2.3933	-0.653427	0.513481	NA	no
Gm37447	1	87036723	ENSMUSG00000103984	predicted gene, 37447 [Source:MGI Symbol;Acc:MGI:5610675]	0	0	0	0	0	0	0	0	0	0	NA	NA	NA	NA	NA	no	0	NA	NA	NA	NA	NA	no	0	NA	NA	NA	NA	NA	no
Akp-ps1	1	87067672	ENSMUSG00000101940	alkaline phosphatase pseudogene 1 [Source:MGI Symbol;Acc:MGI:87981]	0	0	0	0	0	0	0	0	0	0	NA	NA	NA	NA	NA	no	0	NA	NA	NA	NA	NA	no	0	NA	NA	NA	NA	NA	no
Gm29371	1	87080171	ENSMUSG00000101625	predicted gene 29371 [Source:MGI Symbol;Acc:MGI:5580077]	0	0	0	0	0	0	0	0	0	0	NA	NA	NA	NA	NA	no	0	NA	NA	NA	NA	NA	no	0	NA	NA	NA	NA	NA	no
Alppl2	1	87086694	ENSMUSG00000026246	alkaline phosphatase, placental-like 2 [Source:MGI Symbol;Acc:MGI:108009]	0	0	0	0	0	0	0	0	0	0	NA	NA	NA	NA	NA	no	0	NA	NA	NA	NA	NA	no	0	NA	NA	NA	NA	NA	no
Alpi	1	87098002	ENSMUSG00000079440	alkaline phosphatase, intestinal [Source:MGI Symbol;Acc:MGI:1924018]	0	0	0	0	0	0	0	0	0	0	NA	NA	NA	NA	NA	no	0	NA	NA	NA	NA	NA	no	0	NA	NA	NA	NA	NA	no
Gm29372	1	87116321	ENSMUSG00000100940	predicted gene 29372 [Source:MGI Symbol;Acc:MGI:5580078]	0	0	0	0	0	0	0	0	0	0	NA	NA	NA	NA	NA	no	0	NA	NA	NA	NA	NA	no	0	NA	NA	NA	NA	NA	no
Akp3	1	87124973	ENSMUSG00000036500	alkaline phosphatase 3, intestine, not Mn requiring [Source:MGI Symbol;Acc:MGI:87984]	0	0	0	0	0	0	0	0	0	0	NA	NA	NA	NA	NA	no	0	NA	NA	NA	NA	NA	no	0	NA	NA	NA	NA	NA	no
Gm29374	1	87142874	ENSMUSG00000099839	predicted gene 29374 [Source:MGI Symbol;Acc:MGI:5580080]	0	0	0	0	0	0	0	0	0	0	NA	NA	NA	NA	NA	no	0	NA	NA	NA	NA	NA	no	0	NA	NA	NA	NA	NA	no
Ecel1	1	87147655	ENSMUSG00000026247	endothelin converting enzyme-like 1 [Source:MGI Symbol;Acc:MGI:1343461]	0	0	0	0	0	56	125	8	0	13.9277	-3.7179	2.37019	-1.56861	NA	NA	no	13.9277	-0.540885	2.35949	-0.229239	NA	NA	no	13.9277	-3.17701	2.37071	-1.34011	NA	NA	no
Prss56	1	87183313	ENSMUSG00000036480	protease, serine 56 [Source:MGI Symbol;Acc:MGI:1916703]	0	0	0	0	0	0	0	0	0	0	NA	NA	NA	NA	NA	no	0	NA	NA	NA	NA	NA	no	0	NA	NA	NA	NA	NA	no
Chrnd	1	87190607	ENSMUSG00000026251	cholinergic receptor, nicotinic, delta polypeptide [Source:MGI Symbol;Acc:MGI:87893]	0	0	0	0	0	0	0	0	0	0	NA	NA	NA	NA	NA	no	0	NA	NA	NA	NA	NA	no	0	NA	NA	NA	NA	NA	no
Chrng	1	87204657	ENSMUSG00000026253	cholinergic receptor, nicotinic, gamma polypeptide [Source:MGI Symbol;Acc:MGI:87895]	0	0	0	0	0	0	0	0	0	0	NA	NA	NA	NA	NA	no	0	NA	NA	NA	NA	NA	no	0	NA	NA	NA	NA	NA	no
Eif4e2	1	87213914	ENSMUSG00000026254	eukaryotic translation initiation factor 4E member 2 [Source:MGI Symbol;Acc:MGI:1914440]	96	67	138	40	136	121	654	166	37	123.232	-0.76525	0.976122	-0.78397	0.433058	0.981381	no	123.232	-0.932325	0.976109	-0.955145	0.339505	1	no	123.232	0.167075	0.977878	0.170854	0.864338	1	no
Gm26187	1	87251148	ENSMUSG00000088318	predicted gene, 26187 [Source:MGI Symbol;Acc:MGI:5455964]	0	0	0	0	0	0	0	0	0	0	NA	NA	NA	NA	NA	no	0	NA	NA	NA	NA	NA	no	0	NA	NA	NA	NA	NA	no
Efhd1	1	87264363	ENSMUSG00000026255	EF hand domain containing 1 [Source:MGI Symbol;Acc:MGI:1921607]	0	0	0	0	0	0	1	0	0	0.065138	-0.270919	2.40591	-0.112606	0.910343	NA	no	0.065138	-0.363204	2.40591	-0.150963	0.880005	NA	no	0.065138	0	2.40591	0	1	NA	no
Efhd1os	1	87264481	ENSMUSG00000089821	EF hand domain containing 1, opposite strand [Source:MGI Symbol;Acc:MGI:4413444]	0	0	0	0	0	0	0	0	0	0	NA	NA	NA	NA	NA	no	0	NA	NA	NA	NA	NA	no	0	NA	NA	NA	NA	NA	no
Gigyf2	1	87326998	ENSMUSG00000048000	GRB10 interacting GYF protein 2 [Source:MGI Symbol;Acc:MGI:2138584]	13	4	257	222	326	269	247	149	90	151.579	-0.256238	1.22436	-0.209284	NA	NA	no	151.579	1.10566	1.22281	0.904197	NA	NA	no	151.579	-1.3619	1.22376	-1.11287	NA	NA	no
Gm22549	1	87341455	ENSMUSG00000095281	predicted gene, 22549 [Source:MGI Symbol;Acc:MGI:5452326]	0	0	0	0	0	0	0	0	0	0	NA	NA	NA	NA	NA	no	0	NA	NA	NA	NA	NA	no	0	NA	NA	NA	NA	NA	no
Kcnj13	1	87386363	ENSMUSG00000079436	potassium inwardly-rectifying channel, subfamily J, member 13 [Source:MGI Symbol;Acc:MGI:3781032]	0	0	0	0	0	0	0	0	0	0	NA	NA	NA	NA	NA	no	0	NA	NA	NA	NA	NA	no	0	NA	NA	NA	NA	NA	no
Gm23504	1	87415255	ENSMUSG00000089613	predicted gene, 23504 [Source:MGI Symbol;Acc:MGI:5453281]	0	0	0	0	0	0	0	0	0	0	NA	NA	NA	NA	NA	no	0	NA	NA	NA	NA	NA	no	0	NA	NA	NA	NA	NA	no
3110079O15Rik	1	87470271	ENSMUSG00000026258	RIKEN cDNA 3110079O15 gene [Source:MGI Symbol;Acc:MGI:1920484]	0	0	0	0	0	0	0	0	0	0	NA	NA	NA	NA	NA	no	0	NA	NA	NA	NA	NA	no	0	NA	NA	NA	NA	NA	no
Ngef	1	87476834	ENSMUSG00000026259	neuronal guanine nucleotide exchange factor [Source:MGI Symbol;Acc:MGI:1858414]	0	0	0	0	0	0	0	0	0	0	NA	NA	NA	NA	NA	no	0	NA	NA	NA	NA	NA	no	0	NA	NA	NA	NA	NA	no
Neu2	1	87509889	ENSMUSG00000079434	neuraminidase 2 [Source:MGI Symbol;Acc:MGI:1344417]	0	0	0	0	0	0	0	0	0	0	NA	NA	NA	NA	NA	no	0	NA	NA	NA	NA	NA	no	0	NA	NA	NA	NA	NA	no
Gm17181	1	87514175	ENSMUSG00000091123	predicted gene 17181 [Source:MGI Symbol;Acc:MGI:4938008]	0	0	0	0	0	0	0	0	0	0	NA	NA	NA	NA	NA	no	0	NA	NA	NA	NA	NA	no	0	NA	NA	NA	NA	NA	no
Gm6153	1	87543635	ENSMUSG00000090994	predicted gene 6153 [Source:MGI Symbol;Acc:MGI:3645798]	0	0	0	0	0	0	0	0	0	0	NA	NA	NA	NA	NA	no	0	NA	NA	NA	NA	NA	no	0	NA	NA	NA	NA	NA	no
Inpp5d	1	87620312	ENSMUSG00000026288	inositol polyphosphate-5-phosphatase D [Source:MGI Symbol;Acc:MGI:107357]	356	244	368	262	74	705	346	714	591	350.923	-0.341835	0.872808	-0.39165	0.695317	1	no	350.923	-0.442546	0.872753	-0.507069	0.612106	1	no	350.923	0.100711	0.873237	0.11533	0.908183	1	no
Atg16l1	1	87755870	ENSMUSG00000026289	autophagy related 16-like 1 (S. cerevisiae) [Source:MGI Symbol;Acc:MGI:1924290]	40	1	226	1	1	32	3	1	99	43.2605	1.2244	1.75462	0.697814	0.485293	0.990999	no	43.2605	-1.47638	1.76112	-0.838318	0.401852	1	no	43.2605	2.70078	1.76022	1.53434	0.124945	0.801697	no
Gm25395	1	87776938	ENSMUSG00000087968	predicted gene, 25395 [Source:MGI Symbol;Acc:MGI:5455172]	0	0	0	0	0	0	0	0	0	0	NA	NA	NA	NA	NA	no	0	NA	NA	NA	NA	NA	no	0	NA	NA	NA	NA	NA	no
Scarna6	1	87784556	ENSMUSG00000089281	small Cajal body-specific RNA 6 [Source:MGI Symbol;Acc:MGI:3819487]	0	0	0	0	0	0	0	0	0	0	NA	NA	NA	NA	NA	no	0	NA	NA	NA	NA	NA	no	0	NA	NA	NA	NA	NA	no
Sag	1	87803680	ENSMUSG00000056055	S-antigen, retina and pineal gland (arrestin) [Source:MGI Symbol;Acc:MGI:98227]	55	0	27	0	0	241	0	117	1	39.4179	-0.0853156	2.23463	-0.0381788	0.969545	1	no	39.4179	0.941403	2.23396	0.421405	0.67346	1	no	39.4179	-1.02672	2.23435	-0.459515	0.645865	1	no
Dgkd	1	87853287	ENSMUSG00000070738	diacylglycerol kinase, delta [Source:MGI Symbol;Acc:MGI:2138334]	144	218	191	661	112	137	37	0	21	167.417	3.52458	1.28374	2.74556	0.00604082	0.140013	no	167.417	4.03964	1.28332	3.1478	0.00164505	0.0734389	no	167.417	-0.515059	1.2754	-0.40384	0.686331	1	no
Gm19582	1	87853347	ENSMUSG00000101942	predicted gene, 19582 [Source:MGI Symbol;Acc:MGI:5011767]	0	0	0	0	0	0	0	0	0	0	NA	NA	NA	NA	NA	no	0	NA	NA	NA	NA	NA	no	0	NA	NA	NA	NA	NA	no
4833421G17Rik	1	87865073	ENSMUSG00000103996	RIKEN cDNA 4833421G17 gene [Source:MGI Symbol;Acc:MGI:1921007]	0	0	0	0	0	0	0	0	0	0	NA	NA	NA	NA	NA	no	0	NA	NA	NA	NA	NA	no	0	NA	NA	NA	NA	NA	no
Gm38365	1	87897540	ENSMUSG00000103591	predicted gene, 38365 [Source:MGI Symbol;Acc:MGI:5611593]	0	0	0	25	0	0	0	0	0	2.72702	0	2.40591	0	NA	NA	no	2.72702	3.9272	2.38699	1.64526	NA	NA	no	2.72702	-3.63104	2.38699	-1.52118	NA	NA	no
Usp40	1	87945119	ENSMUSG00000005501	ubiquitin specific peptidase 40 [Source:MGI Symbol;Acc:MGI:2443184]	34	1	0	160	336	37	0	152	50	77.0435	-1.93464	1.75764	-1.1007	0.271026	0.896083	no	77.0435	1.5148	1.75031	0.865443	0.386796	1	no	77.0435	-3.44943	1.7568	-1.96347	0.0495913	0.509363	no
Gm25198	1	88015924	ENSMUSG00000095942	predicted gene, 25198 [Source:MGI Symbol;Acc:MGI:5454975]	0	0	0	0	0	0	0	0	0	0	NA	NA	NA	NA	NA	no	0	NA	NA	NA	NA	NA	no	0	NA	NA	NA	NA	NA	no
Gm5832	1	88022381	ENSMUSG00000084021	predicted gene 5832 [Source:MGI Symbol;Acc:MGI:3643737]	0	0	0	0	0	0	0	0	0	0	NA	NA	NA	NA	NA	no	0	NA	NA	NA	NA	NA	no	0	NA	NA	NA	NA	NA	no
Gm15375	1	88025211	ENSMUSG00000083478	predicted gene 15375 [Source:MGI Symbol;Acc:MGI:3705815]	0	0	0	0	0	0	0	0	0	0	NA	NA	NA	NA	NA	no	0	NA	NA	NA	NA	NA	no	0	NA	NA	NA	NA	NA	no
Ugt1a10	1	88055388	ENSMUSG00000090165	UDP glycosyltransferase 1 family, polypeptide A10 [Source:MGI Symbol;Acc:MGI:3580642]	0	0	0	0	0	0	0	0	0	0	NA	NA	NA	NA	NA	no	0	NA	NA	NA	NA	NA	no	0	NA	NA	NA	NA	NA	no
Gm20528	1	88055393	ENSMUSG00000092220	predicted gene 20528 [Source:MGI Symbol;Acc:MGI:5141993]	0	0	0	0	0	0	0	0	0	0	NA	NA	NA	NA	NA	no	0	NA	NA	NA	NA	NA	no	0	NA	NA	NA	NA	NA	no
Ugt1a9	1	88070800	ENSMUSG00000090175	UDP glucuronosyltransferase 1 family, polypeptide A9 [Source:MGI Symbol;Acc:MGI:3576092]	0	0	0	0	0	0	0	0	0	0	NA	NA	NA	NA	NA	no	0	NA	NA	NA	NA	NA	no	0	NA	NA	NA	NA	NA	no
Ugt1a8	1	88087813	ENSMUSG00000089675	UDP glucuronosyltransferase 1 family, polypeptide A8 [Source:MGI Symbol;Acc:MGI:3576090]	0	0	0	0	0	0	0	0	0	0	NA	NA	NA	NA	NA	no	0	NA	NA	NA	NA	NA	no	0	NA	NA	NA	NA	NA	no
Ugt1a7c	1	88095062	ENSMUSG00000090124	UDP glucuronosyltransferase 1 family, polypeptide A7C [Source:MGI Symbol;Acc:MGI:3032636]	0	0	0	0	0	0	0	0	0	0	NA	NA	NA	NA	NA	no	0	NA	NA	NA	NA	NA	no	0	NA	NA	NA	NA	NA	no
Gm15373	1	88097918	ENSMUSG00000082837	predicted gene 15373 [Source:MGI Symbol;Acc:MGI:3707583]	0	0	0	0	0	0	0	0	0	0	NA	NA	NA	NA	NA	no	0	NA	NA	NA	NA	NA	no	0	NA	NA	NA	NA	NA	no
Ugt1a6b	1	88103252	ENSMUSG00000090145	UDP glucuronosyltransferase 1 family, polypeptide A6B [Source:MGI Symbol;Acc:MGI:3580629]	0	0	0	0	0	0	0	0	0	0	NA	NA	NA	NA	NA	no	0	NA	NA	NA	NA	NA	no	0	NA	NA	NA	NA	NA	no
Gm15372	1	88126776	ENSMUSG00000084195	predicted gene 15372 [Source:MGI Symbol;Acc:MGI:3707469]	0	0	0	0	0	0	0	0	0	0	NA	NA	NA	NA	NA	no	0	NA	NA	NA	NA	NA	no	0	NA	NA	NA	NA	NA	no
Gm15370	1	88129581	ENSMUSG00000081261	predicted gene 15370 [Source:MGI Symbol;Acc:MGI:3707467]	0	0	0	0	0	0	0	0	0	0	NA	NA	NA	NA	NA	no	0	NA	NA	NA	NA	NA	no	0	NA	NA	NA	NA	NA	no
Ugt1a6a	1	88134809	ENSMUSG00000054545	UDP glucuronosyltransferase 1 family, polypeptide A6A [Source:MGI Symbol;Acc:MGI:2137698]	0	0	0	0	0	0	0	0	0	0	NA	NA	NA	NA	NA	no	0	NA	NA	NA	NA	NA	no	0	NA	NA	NA	NA	NA	no
Gm15369	1	88146376	ENSMUSG00000081602	predicted gene 15369 [Source:MGI Symbol;Acc:MGI:3707466]	0	0	0	0	0	0	0	0	0	0	NA	NA	NA	NA	NA	no	0	NA	NA	NA	NA	NA	no	0	NA	NA	NA	NA	NA	no
Gm15374	1	88151038	ENSMUSG00000082513	predicted gene 15374 [Source:MGI Symbol;Acc:MGI:3707463]	0	0	0	0	0	0	0	0	0	0	NA	NA	NA	NA	NA	no	0	NA	NA	NA	NA	NA	no	0	NA	NA	NA	NA	NA	no
Gm15371	1	88153788	ENSMUSG00000082677	predicted gene 15371 [Source:MGI Symbol;Acc:MGI:3707464]	0	0	0	0	0	0	0	0	0	0	NA	NA	NA	NA	NA	no	0	NA	NA	NA	NA	NA	no	0	NA	NA	NA	NA	NA	no
Ugt1a5	1	88166012	ENSMUSG00000089943	UDP glucuronosyltransferase 1 family, polypeptide A5 [Source:MGI Symbol;Acc:MGI:3032634]	0	0	0	0	0	0	0	0	0	0	NA	NA	NA	NA	NA	no	0	NA	NA	NA	NA	NA	no	0	NA	NA	NA	NA	NA	no
Gm15368	1	88186662	ENSMUSG00000081488	predicted gene 15368 [Source:MGI Symbol;Acc:MGI:3707462]	0	0	0	0	0	0	0	0	0	0	NA	NA	NA	NA	NA	no	0	NA	NA	NA	NA	NA	no	0	NA	NA	NA	NA	NA	no
Gm15376	1	88191901	ENSMUSG00000083277	predicted gene 15376 [Source:MGI Symbol;Acc:MGI:3707460]	0	0	0	0	0	0	0	0	0	0	NA	NA	NA	NA	NA	no	0	NA	NA	NA	NA	NA	no	0	NA	NA	NA	NA	NA	no
Ugt1a2	1	88200601	ENSMUSG00000090171	UDP glucuronosyltransferase 1 family, polypeptide A2 [Source:MGI Symbol;Acc:MGI:3576049]	0	0	0	0	0	0	0	0	0	0	NA	NA	NA	NA	NA	no	0	NA	NA	NA	NA	NA	no	0	NA	NA	NA	NA	NA	no
Dnajb3	1	88204732	ENSMUSG00000081984	DnaJ heat shock protein family (Hsp40) member B3 [Source:MGI Symbol;Acc:MGI:1306822]	0	0	0	0	0	0	0	0	0	0	NA	NA	NA	NA	NA	no	0	NA	NA	NA	NA	NA	no	0	NA	NA	NA	NA	NA	no
Ugt1a1	1	88211959	ENSMUSG00000089960	UDP glucuronosyltransferase 1 family, polypeptide A1 [Source:MGI Symbol;Acc:MGI:98898]	0	0	0	0	0	0	0	0	0	0	NA	NA	NA	NA	NA	no	0	NA	NA	NA	NA	NA	no	0	NA	NA	NA	NA	NA	no
Mroh2a	1	88226986	ENSMUSG00000079429	maestro heat-like repeat family member 2A [Source:MGI Symbol;Acc:MGI:3705228]	0	0	0	0	0	0	0	0	0	0	NA	NA	NA	NA	NA	no	0	NA	NA	NA	NA	NA	no	0	NA	NA	NA	NA	NA	no
Hjurp	1	88262471	ENSMUSG00000044783	Holliday junction recognition protein [Source:MGI Symbol;Acc:MGI:2685821]	51	130	53	2	1	48	204	159	204	81.1821	-0.644369	1.24658	-0.516909	0.60522	1	no	81.1821	-3.06102	1.25601	-2.4371	0.0148058	0.255408	no	81.1821	2.41665	1.25738	1.92197	0.0546095	0.533882	no
Trpm8	1	88277661	ENSMUSG00000036251	transient receptor potential cation channel, subfamily M, member 8 [Source:MGI Symbol;Acc:MGI:2181435]	0	0	0	0	0	0	0	0	0	0	NA	NA	NA	NA	NA	no	0	NA	NA	NA	NA	NA	no	0	NA	NA	NA	NA	NA	no
4930453O03Rik	1	88347489	ENSMUSG00000085420	RIKEN cDNA 4930453O03 gene [Source:MGI Symbol;Acc:MGI:1922135]	0	0	0	0	0	0	0	0	0	0	NA	NA	NA	NA	NA	no	0	NA	NA	NA	NA	NA	no	0	NA	NA	NA	NA	NA	no
Spp2	1	88406961	ENSMUSG00000026295	secreted phosphoprotein 2 [Source:MGI Symbol;Acc:MGI:1922646]	0	0	0	0	0	0	0	0	0	0	NA	NA	NA	NA	NA	no	0	NA	NA	NA	NA	NA	no	0	NA	NA	NA	NA	NA	no
Gm29538	1	88443969	ENSMUSG00000099553	predicted gene 29538 [Source:MGI Symbol;Acc:MGI:5580244]	0	0	0	0	0	0	0	0	0	0	NA	NA	NA	NA	NA	no	0	NA	NA	NA	NA	NA	no	0	NA	NA	NA	NA	NA	no
Gm28888	1	88459683	ENSMUSG00000100908	predicted gene 28888 [Source:MGI Symbol;Acc:MGI:5579594]	0	0	0	0	0	0	0	0	0	0	NA	NA	NA	NA	NA	no	0	NA	NA	NA	NA	NA	no	0	NA	NA	NA	NA	NA	no
Glrp1	1	88499871	ENSMUSG00000062310	glutamine repeat protein 1 [Source:MGI Symbol;Acc:MGI:108038]	0	0	0	0	0	0	0	0	0	0	NA	NA	NA	NA	NA	no	0	NA	NA	NA	NA	NA	no	0	NA	NA	NA	NA	NA	no
Gm19589	1	88551517	ENSMUSG00000100798	predicted gene, 19589 [Source:MGI Symbol;Acc:MGI:5011774]	0	0	0	0	0	0	0	0	0	0	NA	NA	NA	NA	NA	no	0	NA	NA	NA	NA	NA	no	0	NA	NA	NA	NA	NA	no
Gm38130	1	88653085	ENSMUSG00000104057	predicted gene, 38130 [Source:MGI Symbol;Acc:MGI:5611358]	0	0	0	0	0	0	0	0	0	0	NA	NA	NA	NA	NA	no	0	NA	NA	NA	NA	NA	no	0	NA	NA	NA	NA	NA	no
Gm29336	1	88656308	ENSMUSG00000100367	predicted gene 29336 [Source:MGI Symbol;Acc:MGI:5580042]	0	0	0	0	0	0	0	0	0	0	NA	NA	NA	NA	NA	no	0	NA	NA	NA	NA	NA	no	0	NA	NA	NA	NA	NA	no
Arl4c	1	88673125	ENSMUSG00000049866	ADP-ribosylation factor-like 4C [Source:MGI Symbol;Acc:MGI:2445172]	303	218	122	140	647	581	440	478	168	294.275	-0.172974	0.789714	-0.219034	0.826623	1	no	294.275	0.721855	0.788739	0.915201	0.360086	1	no	294.275	-0.894829	0.789427	-1.13352	0.256997	1	no
Gm29335	1	88722366	ENSMUSG00000101736	predicted gene 29335 [Source:MGI Symbol;Acc:MGI:5580041]	0	0	0	0	0	0	2	2	1	0.388391	-1.66934	2.39549	-0.69687	0.485884	NA	no	0.388391	-1.76163	2.39549	-0.735394	0.4621	NA	no	0.388391	0	2.40591	0	1	NA	no
Platr5	1	88754890	ENSMUSG00000097398	pluripotency associated transcript 5 [Source:MGI Symbol;Acc:MGI:1925900]	0	0	0	0	0	0	0	0	0	0	NA	NA	NA	NA	NA	no	0	NA	NA	NA	NA	NA	no	0	NA	NA	NA	NA	NA	no
Gm29337	1	88868475	ENSMUSG00000099848	predicted gene 29337 [Source:MGI Symbol;Acc:MGI:5580043]	0	0	0	0	0	0	0	0	0	0	NA	NA	NA	NA	NA	no	0	NA	NA	NA	NA	NA	no	0	NA	NA	NA	NA	NA	no
Gm4753	1	88932319	ENSMUSG00000101333	predicted gene 4753 [Source:MGI Symbol;Acc:MGI:3648193]	0	0	0	0	0	0	0	0	0	0	NA	NA	NA	NA	NA	no	0	NA	NA	NA	NA	NA	no	0	NA	NA	NA	NA	NA	no
1700067G17Rik	1	89016113	ENSMUSG00000099378	RIKEN cDNA 1700067G17 gene [Source:MGI Symbol;Acc:MGI:1920725]	0	0	0	0	0	0	0	0	0	0	NA	NA	NA	NA	NA	no	0	NA	NA	NA	NA	NA	no	0	NA	NA	NA	NA	NA	no
Gm18699	1	89048974	ENSMUSG00000099544	predicted gene, 18699 [Source:MGI Symbol;Acc:MGI:5010884]	0	0	0	0	0	0	0	0	0	0	NA	NA	NA	NA	NA	no	0	NA	NA	NA	NA	NA	no	0	NA	NA	NA	NA	NA	no
Sh3bp4	1	89070415	ENSMUSG00000036206	SH3-domain binding protein 4 [Source:MGI Symbol;Acc:MGI:2138297]	0	0	0	0	0	0	0	0	1	0.107268	-0.270919	2.40591	-0.112606	0.910343	NA	no	0.107268	-0.363204	2.40591	-0.150963	0.880005	NA	no	0.107268	0	2.40591	0	1	NA	no
Gm38312	1	89097073	ENSMUSG00000102700	predicted gene, 38312 [Source:MGI Symbol;Acc:MGI:5611540]	0	0	0	0	0	0	1	0	0	0.065138	-0.270919	2.40591	-0.112606	0.910343	NA	no	0.065138	-0.363204	2.40591	-0.150963	0.880005	NA	no	0.065138	0	2.40591	0	1	NA	no
Gm5259	1	89256182	ENSMUSG00000102083	predicted gene 5259 [Source:MGI Symbol;Acc:MGI:3644613]	1	0	0	1	0	1	0	2	0	0.446331	-0.191469	2.40182	-0.0797184	0.936461	NA	no	0.446331	0.237548	2.39879	0.0990285	0.921116	NA	no	0.446331	-0.429018	2.40301	-0.178534	0.858304	NA	no
Gm28342	1	89302719	ENSMUSG00000101288	predicted gene 28342 [Source:MGI Symbol;Acc:MGI:5579048]	0	0	0	0	0	0	0	0	0	0	NA	NA	NA	NA	NA	no	0	NA	NA	NA	NA	NA	no	0	NA	NA	NA	NA	NA	no
C030007H22Rik	1	89360342	ENSMUSG00000099938	RIKEN cDNA C030007H22 gene [Source:MGI Symbol;Acc:MGI:1924581]	0	0	0	0	0	0	0	0	0	0	NA	NA	NA	NA	NA	no	0	NA	NA	NA	NA	NA	no	0	NA	NA	NA	NA	NA	no
Agap1	1	89454806	ENSMUSG00000055013	ArfGAP with GTPase domain, ankyrin repeat and PH domain 1 [Source:MGI Symbol;Acc:MGI:2653690]	0	0	0	0	0	1	2	1	0	0.298236	-1.05545	2.40087	-0.439612	0.660218	NA	no	0.298236	-0.580659	2.40087	-0.241853	0.808894	NA	no	0.298236	-0.474794	2.40591	-0.197345	0.843558	NA	no
Gm37297	1	89483438	ENSMUSG00000104114	predicted gene, 37297 [Source:MGI Symbol;Acc:MGI:5610525]	0	0	0	0	0	0	0	0	0	0	NA	NA	NA	NA	NA	no	0	NA	NA	NA	NA	NA	no	0	NA	NA	NA	NA	NA	no
Gm25180	1	89563360	ENSMUSG00000088371	predicted gene, 25180 [Source:MGI Symbol;Acc:MGI:5454957]	0	0	0	0	0	0	0	0	0	0	NA	NA	NA	NA	NA	no	0	NA	NA	NA	NA	NA	no	0	NA	NA	NA	NA	NA	no
Gm28499	1	89568765	ENSMUSG00000101662	predicted gene 28499 [Source:MGI Symbol;Acc:MGI:5579205]	0	0	0	0	0	0	0	0	0	0	NA	NA	NA	NA	NA	no	0	NA	NA	NA	NA	NA	no	0	NA	NA	NA	NA	NA	no
4933400F21Rik	1	89650529	ENSMUSG00000102009	RIKEN cDNA 4933400F21 gene [Source:MGI Symbol;Acc:MGI:1921653]	0	0	0	0	0	0	0	0	0	0	NA	NA	NA	NA	NA	no	0	NA	NA	NA	NA	NA	no	0	NA	NA	NA	NA	NA	no
Gm26037	1	89684802	ENSMUSG00000088775	predicted gene, 26037 [Source:MGI Symbol;Acc:MGI:5455814]	0	0	0	0	0	0	0	0	0	0	NA	NA	NA	NA	NA	no	0	NA	NA	NA	NA	NA	no	0	NA	NA	NA	NA	NA	no
Gm37521	1	89825481	ENSMUSG00000103252	predicted gene, 37521 [Source:MGI Symbol;Acc:MGI:5610749]	0	0	0	0	0	0	1	0	0	0.065138	-0.270919	2.40591	-0.112606	0.910343	NA	no	0.065138	-0.363204	2.40591	-0.150963	0.880005	NA	no	0.065138	0	2.40591	0	1	NA	no
Gbx2	1	89927956	ENSMUSG00000034486	gastrulation brain homeobox 2 [Source:MGI Symbol;Acc:MGI:95668]	0	0	0	0	0	0	0	0	0	0	NA	NA	NA	NA	NA	no	0	NA	NA	NA	NA	NA	no	0	NA	NA	NA	NA	NA	no
D130058E05Rik	1	89930234	ENSMUSG00000092627	RIKEN cDNA D130058E05 gene [Source:MGI Symbol;Acc:MGI:2444614]	0	0	0	0	0	0	0	0	0	0	NA	NA	NA	NA	NA	no	0	NA	NA	NA	NA	NA	no	0	NA	NA	NA	NA	NA	no
Asb18	1	89950220	ENSMUSG00000067081	ankyrin repeat and SOCS box-containing 18 [Source:MGI Symbol;Acc:MGI:2655109]	0	0	0	0	0	0	0	0	0	0	NA	NA	NA	NA	NA	no	0	NA	NA	NA	NA	NA	no	0	NA	NA	NA	NA	NA	no
Iqca	1	90042132	ENSMUSG00000026301	IQ motif containing with AAA domain [Source:MGI Symbol;Acc:MGI:1922168]	0	0	0	0	0	0	0	0	0	0	NA	NA	NA	NA	NA	no	0	NA	NA	NA	NA	NA	no	0	NA	NA	NA	NA	NA	no
4930434B07Rik	1	90153628	ENSMUSG00000100850	RIKEN cDNA 4930434B07 gene [Source:MGI Symbol;Acc:MGI:1921223]	0	0	0	0	0	0	0	0	0	0	NA	NA	NA	NA	NA	no	0	NA	NA	NA	NA	NA	no	0	NA	NA	NA	NA	NA	no
Ackr3	1	90203980	ENSMUSG00000044337	atypical chemokine receptor 3 [Source:MGI Symbol;Acc:MGI:109562]	0	0	0	0	0	0	0	1	0	0.0754234	-0.270919	2.40591	-0.112606	0.910343	NA	no	0.0754234	-0.363204	2.40591	-0.150963	0.880005	NA	no	0.0754234	0	2.40591	0	1	NA	no
Gm38277	1	90227160	ENSMUSG00000104087	predicted gene, 38277 [Source:MGI Symbol;Acc:MGI:5611505]	0	0	0	0	0	0	0	0	0	0	NA	NA	NA	NA	NA	no	0	NA	NA	NA	NA	NA	no	0	NA	NA	NA	NA	NA	no
Gm28721	1	90255276	ENSMUSG00000101951	predicted gene 28721 [Source:MGI Symbol;Acc:MGI:5579427]	0	0	0	0	0	0	0	0	0	0	NA	NA	NA	NA	NA	no	0	NA	NA	NA	NA	NA	no	0	NA	NA	NA	NA	NA	no
Gm28723	1	90280458	ENSMUSG00000101028	predicted gene 28723 [Source:MGI Symbol;Acc:MGI:5579429]	0	0	0	0	0	0	0	0	0	0	NA	NA	NA	NA	NA	no	0	NA	NA	NA	NA	NA	no	0	NA	NA	NA	NA	NA	no
Gm27648	1	90327312	ENSMUSG00000098368	predicted gene, 27648 [Source:MGI Symbol;Acc:MGI:5531030]	0	0	0	0	0	0	0	0	0	0	NA	NA	NA	NA	NA	no	0	NA	NA	NA	NA	NA	no	0	NA	NA	NA	NA	NA	no
Gm28722	1	90453394	ENSMUSG00000101997	predicted gene 28722 [Source:MGI Symbol;Acc:MGI:5579428]	0	0	0	0	0	0	0	0	0	0	NA	NA	NA	NA	NA	no	0	NA	NA	NA	NA	NA	no	0	NA	NA	NA	NA	NA	no
Gm35048	1	90520496	ENSMUSG00000103292	predicted gene, 35048 [Source:MGI Symbol;Acc:MGI:5594207]	0	0	0	0	0	0	0	0	0	0	NA	NA	NA	NA	NA	no	0	NA	NA	NA	NA	NA	no	0	NA	NA	NA	NA	NA	no
Cops8	1	90602981	ENSMUSG00000034432	COP9 signalosome subunit 8 [Source:MGI Symbol;Acc:MGI:1915363]	0	28	21	6	55	152	1	77	83	41.7318	-1.06067	1.63431	-0.649004	0.516336	0.99208	no	41.7318	0.423119	1.63018	0.259554	0.795208	1	no	41.7318	-1.48379	1.63416	-0.907982	0.363888	1	no
Gm9991	1	90675161	ENSMUSG00000056128	predicted gene 9991 [Source:MGI Symbol;Acc:MGI:3643217]	0	0	0	0	0	0	0	0	0	0	NA	NA	NA	NA	NA	no	0	NA	NA	NA	NA	NA	no	0	NA	NA	NA	NA	NA	no
Col6a3	1	90765923	ENSMUSG00000048126	collagen, type VI, alpha 3 [Source:MGI Symbol;Acc:MGI:88461]	0	1	0	0	0	0	1	0	0	0.207696	0.29616	2.40591	0.123097	0.902031	NA	no	0.207696	-0.363204	2.40591	-0.150963	0.880005	NA	no	0.207696	0.659364	2.40591	0.27406	0.784039	NA	no
Gm36970	1	90837275	ENSMUSG00000103061	predicted gene, 36970 [Source:MGI Symbol;Acc:MGI:5610198]	0	0	0	0	0	0	1	0	0	0.065138	-0.270919	2.40591	-0.112606	0.910343	NA	no	0.065138	-0.363204	2.40591	-0.150963	0.880005	NA	no	0.065138	0	2.40591	0	1	NA	no
4930474B08Rik	1	90870583	ENSMUSG00000103978	RIKEN cDNA 4930474B08 gene [Source:MGI Symbol;Acc:MGI:1922186]	0	0	0	0	0	0	0	0	0	0	NA	NA	NA	NA	NA	no	0	NA	NA	NA	NA	NA	no	0	NA	NA	NA	NA	NA	no
Mlph	1	90915085	ENSMUSG00000026303	melanophilin [Source:MGI Symbol;Acc:MGI:2176380]	0	0	0	0	0	0	0	0	0	0	NA	NA	NA	NA	NA	no	0	NA	NA	NA	NA	NA	no	0	NA	NA	NA	NA	NA	no
Prlh	1	90953108	ENSMUSG00000090550	prolactin releasing hormone [Source:MGI Symbol;Acc:MGI:3644668]	0	0	0	0	0	0	0	0	0	0	NA	NA	NA	NA	NA	no	0	NA	NA	NA	NA	NA	no	0	NA	NA	NA	NA	NA	no
Rab17	1	90958133	ENSMUSG00000026304	RAB17, member RAS oncogene family [Source:MGI Symbol;Acc:MGI:104640]	0	1	0	0	0	0	0	0	0	0.142558	0.863238	2.40591	0.358799	0.719746	NA	no	0.142558	0	2.40591	0	1	NA	no	0.142558	0.659364	2.40591	0.27406	0.784039	NA	no
Gm28199	1	90974459	ENSMUSG00000100791	predicted gene 28199 [Source:MGI Symbol;Acc:MGI:5578905]	0	0	0	0	0	0	0	0	0	0	NA	NA	NA	NA	NA	no	0	NA	NA	NA	NA	NA	no	0	NA	NA	NA	NA	NA	no
Lrrfip1	1	90998737	ENSMUSG00000026305	leucine rich repeat (in FLII) interacting protein 1 [Source:MGI Symbol;Acc:MGI:1342770]	796	125	85	2	237	405	240	1538	412	340.972	-0.721731	1.33894	-0.539033	0.589864	1	no	340.972	-1.3578	1.33917	-1.01391	0.310626	1	no	340.972	0.636067	1.33952	0.474846	0.634897	1	no
Rbm44	1	91145089	ENSMUSG00000070732	RNA binding motif protein 44 [Source:MGI Symbol;Acc:MGI:2685663]	0	0	0	0	0	0	0	0	0	0	NA	NA	NA	NA	NA	no	0	NA	NA	NA	NA	NA	no	0	NA	NA	NA	NA	NA	no
Gm7776	1	91171429	ENSMUSG00000100018	predicted gene 7776 [Source:MGI Symbol;Acc:MGI:3646051]	3	2	2	0	0	0	0	0	1	0.897838	1.99925	2.39107	0.836133	0.40308	NA	no	0.897838	-0.429706	2.40434	-0.178721	0.858157	NA	no	0.897838	2.42895	2.39285	1.01509	0.310065	NA	no
Ramp1	1	91179822	ENSMUSG00000034353	receptor (calcitonin) activity modifying protein 1 [Source:MGI Symbol;Acc:MGI:1858418]	98	44	35	150	97	51	69	81	0	61.4685	0.800555	1.29695	0.617261	0.537063	0.99208	no	61.4685	1.44704	1.29543	1.11703	0.263981	1	no	61.4685	-0.646485	1.2946	-0.49937	0.617519	1	no
Ube2f	1	91250304	ENSMUSG00000034343	ubiquitin-conjugating enzyme E2F (putative) [Source:MGI Symbol;Acc:MGI:1915171]	109	643	60	428	296	45	360	117	131	237.507	1.15381	1.16575	0.989753	0.322295	0.939834	no	237.507	0.782365	1.16587	0.671059	0.502183	1	no	237.507	0.371444	1.16542	0.31872	0.749939	1	no
Gm7785	1	91296045	ENSMUSG00000083064	predicted gene 7785 [Source:MGI Symbol;Acc:MGI:3645449]	0	0	0	0	0	0	0	0	0	0	NA	NA	NA	NA	NA	no	0	NA	NA	NA	NA	NA	no	0	NA	NA	NA	NA	NA	no
Gm26683	1	91297203	ENSMUSG00000097285	predicted gene, 26683 [Source:MGI Symbol;Acc:MGI:5477177]	0	0	0	0	0	0	0	0	0	0	NA	NA	NA	NA	NA	no	0	NA	NA	NA	NA	NA	no	0	NA	NA	NA	NA	NA	no
Scly	1	91298338	ENSMUSG00000026307	selenocysteine lyase [Source:MGI Symbol;Acc:MGI:1355310]	81	1	1	0	0	108	0	22	80	28.0924	-0.281679	2.13051	-0.132212	0.894817	1	no	28.0924	-0.0247467	2.13003	-0.011618	0.99073	1	no	28.0924	-0.256933	2.13081	-0.12058	0.904024	1	no
Gm17090	1	91305092	ENSMUSG00000090322	predicted gene 17090 [Source:MGI Symbol;Acc:MGI:4937917]	0	0	0	0	0	0	0	0	0	0	NA	NA	NA	NA	NA	no	0	NA	NA	NA	NA	NA	no	0	NA	NA	NA	NA	NA	no
Espnl	1	91322075	ENSMUSG00000049515	espin-like [Source:MGI Symbol;Acc:MGI:2685402]	0	0	0	0	0	0	0	0	0	0	NA	NA	NA	NA	NA	no	0	NA	NA	NA	NA	NA	no	0	NA	NA	NA	NA	NA	no
Klhl30	1	91351016	ENSMUSG00000026308	kelch-like 30 [Source:MGI Symbol;Acc:MGI:1918038]	0	0	0	0	0	0	0	0	0	0	NA	NA	NA	NA	NA	no	0	NA	NA	NA	NA	NA	no	0	NA	NA	NA	NA	NA	no
Erfe	1	91366430	ENSMUSG00000047443	erythroferrone [Source:MGI Symbol;Acc:MGI:3606476]	0	0	0	0	0	0	0	0	0	0	NA	NA	NA	NA	NA	no	0	NA	NA	NA	NA	NA	no	0	NA	NA	NA	NA	NA	no
Ilkap	1	91373861	ENSMUSG00000026309	integrin-linked kinase-associated serine/threonine phosphatase 2C [Source:MGI Symbol;Acc:MGI:1914694]	131	264	196	96	71	278	78	434	20	155.635	0.801798	1.08411	0.739593	0.459547	0.988321	no	155.635	0.125269	1.08464	0.115494	0.908053	1	no	155.635	0.676528	1.08433	0.623913	0.532685	1	no
1700020N18Rik	1	91404879	ENSMUSG00000100253	RIKEN cDNA 1700020N18 gene [Source:MGI Symbol;Acc:MGI:1914336]	0	0	0	0	0	0	0	0	0	0	NA	NA	NA	NA	NA	no	0	NA	NA	NA	NA	NA	no	0	NA	NA	NA	NA	NA	no
Hes6	1	91411483	ENSMUSG00000067071	hairy and enhancer of split 6 [Source:MGI Symbol;Acc:MGI:1859852]	169	31	44	211	99	60	991	66	39	138.098	-1.45218	1.17602	-1.23483	0.216896	0.844054	no	138.098	-0.85777	1.17476	-0.730165	0.465289	1	no	138.098	-0.594408	1.17702	-0.505013	0.61355	1	no
Per2	1	91415982	ENSMUSG00000055866	period circadian clock 2 [Source:MGI Symbol;Acc:MGI:1195265]	0	2	0	0	1	101	2	1	1	10.0515	-0.109989	2.07434	-0.0530236	NA	NA	no	10.0515	3.90349	2.02848	1.92434	NA	NA	no	10.0515	-4.01347	2.04515	-1.96243	NA	NA	no
Gm28381	1	91469906	ENSMUSG00000101911	predicted gene 28381 [Source:MGI Symbol;Acc:MGI:5579087]	0	0	0	0	0	0	0	0	0	0	NA	NA	NA	NA	NA	no	0	NA	NA	NA	NA	NA	no	0	NA	NA	NA	NA	NA	no
Gm28382	1	91483024	ENSMUSG00000100151	predicted gene 28382 [Source:MGI Symbol;Acc:MGI:5579088]	0	0	0	0	0	0	0	0	0	0	NA	NA	NA	NA	NA	no	0	NA	NA	NA	NA	NA	no	0	NA	NA	NA	NA	NA	no
Gm19085	1	91487729	ENSMUSG00000101958	predicted gene, 19085 [Source:MGI Symbol;Acc:MGI:5011270]	0	0	0	0	0	0	0	0	0	0	NA	NA	NA	NA	NA	no	0	NA	NA	NA	NA	NA	no	0	NA	NA	NA	NA	NA	no
Traf3ip1	1	91494647	ENSMUSG00000034292	TRAF3 interacting protein 1 [Source:MGI Symbol;Acc:MGI:1921269]	0	0	0	0	4	0	0	0	0	0.42863	0	2.40591	0	1	NA	no	0.42863	2.06088	2.39745	0.859611	0.390003	NA	no	0.42863	-1.76472	2.39745	-0.73608	0.461682	NA	no
Asb1	1	91540544	ENSMUSG00000026311	ankyrin repeat and SOCS box-containing 1 [Source:MGI Symbol;Acc:MGI:1929735]	0	0	0	0	2	19	2	0	45	6.92987	-3.98176	2.34309	-1.69936	NA	NA	no	6.92987	-0.973642	2.31508	-0.420565	NA	NA	no	6.92987	-3.00812	2.34521	-1.28267	NA	NA	no
Gm28380	1	91611406	ENSMUSG00000101705	predicted gene 28380 [Source:MGI Symbol;Acc:MGI:5579086]	0	0	0	0	0	0	0	0	0	0	NA	NA	NA	NA	NA	no	0	NA	NA	NA	NA	NA	no	0	NA	NA	NA	NA	NA	no
Gm29100	1	91798528	ENSMUSG00000100980	predicted gene 29100 [Source:MGI Symbol;Acc:MGI:5579806]	0	0	0	0	0	0	0	0	0	0	NA	NA	NA	NA	NA	no	0	NA	NA	NA	NA	NA	no	0	NA	NA	NA	NA	NA	no
Twist2	1	91801461	ENSMUSG00000007805	twist basic helix-loop-helix transcription factor 2 [Source:MGI Symbol;Acc:MGI:104685]	0	0	0	0	0	0	0	0	0	0	NA	NA	NA	NA	NA	no	0	NA	NA	NA	NA	NA	no	0	NA	NA	NA	NA	NA	no
Gm29101	1	91822515	ENSMUSG00000101414	predicted gene 29101 [Source:MGI Symbol;Acc:MGI:5579807]	0	0	0	0	0	0	0	0	0	0	NA	NA	NA	NA	NA	no	0	NA	NA	NA	NA	NA	no	0	NA	NA	NA	NA	NA	no
Gm37600	1	91916260	ENSMUSG00000102745	predicted gene, 37600 [Source:MGI Symbol;Acc:MGI:5610828]	0	0	0	0	0	0	0	0	0	0	NA	NA	NA	NA	NA	no	0	NA	NA	NA	NA	NA	no	0	NA	NA	NA	NA	NA	no
Hdac4	1	91928779	ENSMUSG00000026313	histone deacetylase 4 [Source:MGI Symbol;Acc:MGI:3036234]	9	46	52	66	6	200	118	87	160	70.9834	-1.17106	1.18585	-0.987534	0.323381	0.940916	no	70.9834	-0.23635	1.18277	-0.199828	0.841615	1	no	70.9834	-0.934713	1.18669	-0.787661	0.430895	1	no
Gm37048	1	91975987	ENSMUSG00000103101	predicted gene, 37048 [Source:MGI Symbol;Acc:MGI:5610276]	0	0	0	0	0	0	0	0	0	0	NA	NA	NA	NA	NA	no	0	NA	NA	NA	NA	NA	no	0	NA	NA	NA	NA	NA	no
Gm26720	1	91989051	ENSMUSG00000096941	predicted gene, 26720 [Source:MGI Symbol;Acc:MGI:5477214]	0	0	0	0	0	0	0	0	0	0	NA	NA	NA	NA	NA	no	0	NA	NA	NA	NA	NA	no	0	NA	NA	NA	NA	NA	no
Gm37036	1	92019592	ENSMUSG00000102565	predicted gene, 37036 [Source:MGI Symbol;Acc:MGI:5610264]	0	0	0	0	0	0	0	0	0	0	NA	NA	NA	NA	NA	no	0	NA	NA	NA	NA	NA	no	0	NA	NA	NA	NA	NA	no
Gm29099	1	92324510	ENSMUSG00000101265	predicted gene 29099 [Source:MGI Symbol;Acc:MGI:5579805]	0	0	0	0	0	0	0	0	0	0	NA	NA	NA	NA	NA	no	0	NA	NA	NA	NA	NA	no	0	NA	NA	NA	NA	NA	no
Gm7837	1	92430121	ENSMUSG00000101522	predicted gene 7837 [Source:MGI Symbol;Acc:MGI:3644044]	0	0	0	0	0	0	0	0	0	0	NA	NA	NA	NA	NA	no	0	NA	NA	NA	NA	NA	no	0	NA	NA	NA	NA	NA	no
Ndufa10	1	92439010	ENSMUSG00000026260	NADH dehydrogenase (ubiquinone) 1 alpha subcomplex 10 [Source:MGI Symbol;Acc:MGI:1914523]	138	94	46	49	249	44	78	241	30	94.0773	0.237449	1.05153	0.225812	0.821348	1	no	94.0773	0.424265	1.05087	0.403727	0.686414	1	no	94.0773	-0.186817	1.05135	-0.177691	0.858965	1	no
Mir6900	1	92464483	ENSMUSG00000098288	microRNA 6900 [Source:MGI Symbol;Acc:MGI:5531090]	0	0	0	0	0	0	0	0	0	0	NA	NA	NA	NA	NA	no	0	NA	NA	NA	NA	NA	no	0	NA	NA	NA	NA	NA	no
Olfr1416	1	92475925	ENSMUSG00000067064	olfactory receptor 1416 [Source:MGI Symbol;Acc:MGI:3031250]	0	0	0	0	0	0	0	0	0	0	NA	NA	NA	NA	NA	no	0	NA	NA	NA	NA	NA	no	0	NA	NA	NA	NA	NA	no
Olfr1415	1	92489101	ENSMUSG00000057464	olfactory receptor 1415 [Source:MGI Symbol;Acc:MGI:3031249]	0	0	0	0	0	0	0	0	0	0	NA	NA	NA	NA	NA	no	0	NA	NA	NA	NA	NA	no	0	NA	NA	NA	NA	NA	no
Olfr1414	1	92506366	ENSMUSG00000042849	olfactory receptor 1414 [Source:MGI Symbol;Acc:MGI:3031248]	0	0	0	0	0	0	0	0	0	0	NA	NA	NA	NA	NA	no	0	NA	NA	NA	NA	NA	no	0	NA	NA	NA	NA	NA	no
Olfr1413	1	92571322	ENSMUSG00000058904	olfactory receptor 1413 [Source:MGI Symbol;Acc:MGI:3031247]	0	0	0	0	0	0	0	0	0	0	NA	NA	NA	NA	NA	no	0	NA	NA	NA	NA	NA	no	0	NA	NA	NA	NA	NA	no
1700054K02Rik	1	92572374	ENSMUSG00000097001	RIKEN cDNA 1700054K02 gene [Source:MGI Symbol;Acc:MGI:1925600]	0	0	0	0	0	0	0	0	0	0	NA	NA	NA	NA	NA	no	0	NA	NA	NA	NA	NA	no	0	NA	NA	NA	NA	NA	no
Gm28478	1	92574614	ENSMUSG00000099363	predicted gene 28478 [Source:MGI Symbol;Acc:MGI:5579184]	0	0	0	0	0	0	0	0	0	0	NA	NA	NA	NA	NA	no	0	NA	NA	NA	NA	NA	no	0	NA	NA	NA	NA	NA	no
Olfr1412	1	92585779	ENSMUSG00000046300	olfactory receptor 1412 [Source:MGI Symbol;Acc:MGI:3031246]	0	0	0	0	0	0	0	0	0	0	NA	NA	NA	NA	NA	no	0	NA	NA	NA	NA	NA	no	0	NA	NA	NA	NA	NA	no
Gm44098	1	92589872	ENSMUSG00000107778	predicted gene, 44098 [Source:MGI Symbol;Acc:MGI:5690490]	0	0	0	0	0	0	0	0	0	0	NA	NA	NA	NA	NA	no	0	NA	NA	NA	NA	NA	no	0	NA	NA	NA	NA	NA	no
Olfr1411	1	92594411	ENSMUSG00000062497	olfactory receptor 1411 [Source:MGI Symbol;Acc:MGI:3031245]	0	0	0	0	0	0	0	0	0	0	NA	NA	NA	NA	NA	no	0	NA	NA	NA	NA	NA	no	0	NA	NA	NA	NA	NA	no
Gm44099	1	92595365	ENSMUSG00000108131	predicted gene, 44099 [Source:MGI Symbol;Acc:MGI:5690491]	0	0	0	0	0	0	0	0	0	0	NA	NA	NA	NA	NA	no	0	NA	NA	NA	NA	NA	no	0	NA	NA	NA	NA	NA	no
Olfr1410	1	92605782	ENSMUSG00000063583	olfactory receptor 1410 [Source:MGI Symbol;Acc:MGI:3031244]	0	0	0	0	0	0	0	0	0	0	NA	NA	NA	NA	NA	no	0	NA	NA	NA	NA	NA	no	0	NA	NA	NA	NA	NA	no
Olfr12	1	92617788	ENSMUSG00000061616	olfactory receptor 12 [Source:MGI Symbol;Acc:MGI:107863]	0	0	0	0	0	0	0	0	0	0	NA	NA	NA	NA	NA	no	0	NA	NA	NA	NA	NA	no	0	NA	NA	NA	NA	NA	no
Cops9	1	92637145	ENSMUSG00000073616	COP9 signalosome subunit 9 [Source:MGI Symbol;Acc:MGI:1914165]	128	181	86	46	275	220	56	82	160	129.283	0.782294	0.957859	0.816711	0.414094	0.978527	no	129.283	0.984256	0.957338	1.02812	0.303895	1	no	129.283	-0.201962	0.956832	-0.211074	0.83283	1	no
Otos	1	92644218	ENSMUSG00000044055	otospiralin [Source:MGI Symbol;Acc:MGI:2672814]	0	0	0	0	0	0	0	0	0	0	NA	NA	NA	NA	NA	no	0	NA	NA	NA	NA	NA	no	0	NA	NA	NA	NA	NA	no
Gm29483	1	92714234	ENSMUSG00000100546	predicted gene 29483 [Source:MGI Symbol;Acc:MGI:5580189]	0	0	0	0	0	0	0	0	0	0	NA	NA	NA	NA	NA	no	0	NA	NA	NA	NA	NA	no	0	NA	NA	NA	NA	NA	no
Gm29482	1	92759213	ENSMUSG00000099665	predicted gene 29482 [Source:MGI Symbol;Acc:MGI:5580188]	0	0	0	0	0	0	0	0	0	0	NA	NA	NA	NA	NA	no	0	NA	NA	NA	NA	NA	no	0	NA	NA	NA	NA	NA	no
Gm29481	1	92820958	ENSMUSG00000100781	predicted gene 29481 [Source:MGI Symbol;Acc:MGI:5580187]	0	0	0	0	0	0	0	0	0	0	NA	NA	NA	NA	NA	no	0	NA	NA	NA	NA	NA	no	0	NA	NA	NA	NA	NA	no
Gpc1	1	92831645	ENSMUSG00000034220	glypican 1 [Source:MGI Symbol;Acc:MGI:1194891]	14	41	0	0	0	0	3	0	0	7.35442	3.48978	2.3709	1.47192	0.141041	NA	no	7.35442	-1.09595	2.39372	-0.457842	0.647066	NA	no	7.35442	4.58573	2.38513	1.92263	0.0545264	NA	no
Gm29480	1	92842177	ENSMUSG00000101995	predicted gene 29480 [Source:MGI Symbol;Acc:MGI:5580186]	0	0	0	0	0	0	0	0	0	0	NA	NA	NA	NA	NA	no	0	NA	NA	NA	NA	NA	no	0	NA	NA	NA	NA	NA	no
Mir149	1	92850378	ENSMUSG00000065470	microRNA 149 [Source:MGI Symbol;Acc:MGI:2676834]	0	0	0	0	0	0	0	0	0	0	NA	NA	NA	NA	NA	no	0	NA	NA	NA	NA	NA	no	0	NA	NA	NA	NA	NA	no
Ankmy1	1	92859803	ENSMUSG00000034212	ankyrin repeat and MYND domain containing 1 [Source:MGI Symbol;Acc:MGI:3045261]	0	0	0	0	0	0	0	0	0	0	NA	NA	NA	NA	NA	no	0	NA	NA	NA	NA	NA	no	0	NA	NA	NA	NA	NA	no
Dusp28	1	92906981	ENSMUSG00000047067	dual specificity phosphatase 28 [Source:MGI Symbol;Acc:MGI:1914696]	1	1	0	0	0	114	1	53	0	14.8482	-2.53388	2.23526	-1.1336	NA	NA	no	14.8482	1.04511	2.21862	0.471064	NA	NA	no	14.8482	-3.57899	2.23439	-1.60178	NA	NA	no
5033417F24Rik	1	92908378	ENSMUSG00000097251	RIKEN cDNA 5033417F24 gene [Source:MGI Symbol;Acc:MGI:1923245]	0	0	0	0	0	0	0	0	0	0	NA	NA	NA	NA	NA	no	0	NA	NA	NA	NA	NA	no	0	NA	NA	NA	NA	NA	no
Rnpepl1	1	92910783	ENSMUSG00000026269	arginyl aminopeptidase (aminopeptidase B)-like 1 [Source:MGI Symbol;Acc:MGI:1914170]	356	2	92	158	0	152	2	40	450	126.717	-0.189205	1.77897	-0.106356	0.9153	1	no	126.717	-0.602622	1.77911	-0.338721	0.73482	1	no	126.717	0.413418	1.7794	0.232336	0.816277	1	no
9430060I03Rik	1	92933526	ENSMUSG00000100632	RIKEN cDNA 9430060I03 gene [Source:MGI Symbol;Acc:MGI:3702484]	0	0	121	321	0	0	0	0	0	48.5581	3.16128	2.3613	1.33879	NA	NA	no	48.5581	4.14592	2.36102	1.75598	NA	NA	no	48.5581	-0.984633	2.35829	-0.41752	NA	NA	no
Capn10	1	92934376	ENSMUSG00000026270	calpain 10 [Source:MGI Symbol;Acc:MGI:1344392]	0	0	0	0	0	0	1	0	0	0.065138	-0.270919	2.40591	-0.112606	0.910343	NA	no	0.065138	-0.363204	2.40591	-0.150963	0.880005	NA	no	0.065138	0	2.40591	0	1	NA	no
Gpr35	1	92950865	ENSMUSG00000026271	G protein-coupled receptor 35 [Source:MGI Symbol;Acc:MGI:1929509]	0	0	0	0	0	0	0	0	0	0	NA	NA	NA	NA	NA	no	0	NA	NA	NA	NA	NA	no	0	NA	NA	NA	NA	NA	no
Gm18697	1	92999396	ENSMUSG00000100021	predicted gene, 18697 [Source:MGI Symbol;Acc:MGI:5010882]	0	0	0	0	0	0	0	0	0	0	NA	NA	NA	NA	NA	no	0	NA	NA	NA	NA	NA	no	0	NA	NA	NA	NA	NA	no
Aqp12	1	93006334	ENSMUSG00000045091	aquaporin 12 [Source:MGI Symbol;Acc:MGI:2664636]	1	0	0	1	0	0	2	1	1	0.515915	-0.840263	2.39593	-0.350705	0.72581	NA	no	0.515915	-0.932548	2.39593	-0.389222	0.697112	NA	no	0.515915	0.0922849	2.40591	0.0383576	0.969403	NA	no
Kif1a	1	93015464	ENSMUSG00000014602	kinesin family member 1A [Source:MGI Symbol;Acc:MGI:108391]	0	0	0	0	0	0	0	0	0	0	NA	NA	NA	NA	NA	no	0	NA	NA	NA	NA	NA	no	0	NA	NA	NA	NA	NA	no
Gm28086	1	93122931	ENSMUSG00000101378	predicted gene 28086 [Source:MGI Symbol;Acc:MGI:5578792]	0	0	0	0	0	0	0	0	0	0	NA	NA	NA	NA	NA	no	0	NA	NA	NA	NA	NA	no	0	NA	NA	NA	NA	NA	no
Agxt	1	93135240	ENSMUSG00000026272	alanine-glyoxylate aminotransferase [Source:MGI Symbol;Acc:MGI:1329033]	0	0	0	0	0	0	0	0	0	0	NA	NA	NA	NA	NA	no	0	NA	NA	NA	NA	NA	no	0	NA	NA	NA	NA	NA	no
2310007B03Rik	1	93151349	ENSMUSG00000034159	RIKEN cDNA 2310007B03 gene [Source:MGI Symbol;Acc:MGI:1919124]	0	0	0	0	0	0	0	0	0	0	NA	NA	NA	NA	NA	no	0	NA	NA	NA	NA	NA	no	0	NA	NA	NA	NA	NA	no
Crocc2	1	93168725	ENSMUSG00000084989	ciliary rootlet coiled-coil, rootletin family member 2 [Source:MGI Symbol;Acc:MGI:3045962]	0	0	0	0	0	0	0	0	0	0	NA	NA	NA	NA	NA	no	0	NA	NA	NA	NA	NA	no	0	NA	NA	NA	NA	NA	no
Sned1	1	93235841	ENSMUSG00000047793	sushi, nidogen and EGF-like domains 1 [Source:MGI Symbol;Acc:MGI:3045960]	0	0	0	0	0	0	0	0	0	0	NA	NA	NA	NA	NA	no	0	NA	NA	NA	NA	NA	no	0	NA	NA	NA	NA	NA	no
Mir6901	1	93274549	ENSMUSG00000098997	microRNA 6901 [Source:MGI Symbol;Acc:MGI:5531114]	0	0	0	0	0	0	0	0	0	0	NA	NA	NA	NA	NA	no	0	NA	NA	NA	NA	NA	no	0	NA	NA	NA	NA	NA	no
Mterf4	1	93299211	ENSMUSG00000026273	mitochondrial transcription termination factor 4 [Source:MGI Symbol;Acc:MGI:1918355]	134	128	0	0	2	0	0	0	6	31.6835	4.31557	2.14291	2.01388	0.0440219	0.419263	no	31.6835	-0.924515	2.16933	-0.426175	0.669981	1	no	31.6835	5.24008	2.15869	2.42744	0.0152058	0.27252	no
Gm28535	1	93305964	ENSMUSG00000101172	predicted gene 28535 [Source:MGI Symbol;Acc:MGI:5579241]	0	0	0	0	0	0	0	0	0	0	NA	NA	NA	NA	NA	no	0	NA	NA	NA	NA	NA	no	0	NA	NA	NA	NA	NA	no
Gm7867	1	93306694	ENSMUSG00000100351	predicted gene 7867 [Source:MGI Symbol;Acc:MGI:3644627]	1	2	0	0	0	1	0	1	0	0.546942	1.27105	2.39777	0.530098	0.596044	NA	no	0.546942	0.168852	2.40498	0.070209	0.944027	NA	no	0.546942	1.1022	2.39877	0.459486	0.645885	NA	no
Pask	1	93308770	ENSMUSG00000026274	PAS domain containing serine/threonine kinase [Source:MGI Symbol;Acc:MGI:2155936]	0	0	0	0	0	0	0	0	0	0	NA	NA	NA	NA	NA	no	0	NA	NA	NA	NA	NA	no	0	NA	NA	NA	NA	NA	no
Ppp1r7	1	93342854	ENSMUSG00000026275	protein phosphatase 1, regulatory (inhibitor) subunit 7 [Source:MGI Symbol;Acc:MGI:1913635]	219	135	349	184	118	126	150	79	108	150.554	1.50263	0.662133	2.26938	0.0232453	0.294227	no	150.554	0.687723	0.663345	1.03675	0.299852	1	no	150.554	0.814908	0.661149	1.23256	0.217738	0.985344	no
Mir6902	1	93346092	ENSMUSG00000106302	microRNA 6902 [Source:MGI Symbol;Acc:MGI:5562723]	0	0	0	0	0	0	0	0	0	0	NA	NA	NA	NA	NA	no	0	NA	NA	NA	NA	NA	no	0	NA	NA	NA	NA	NA	no
Mir6345	1	93352158	ENSMUSG00000098689	microRNA 6345 [Source:MGI Symbol;Acc:MGI:5531201]	0	0	0	0	0	0	0	0	0	0	NA	NA	NA	NA	NA	no	0	NA	NA	NA	NA	NA	no	0	NA	NA	NA	NA	NA	no
Gm26446	1	93363255	ENSMUSG00000064389	predicted gene, 26446 [Source:MGI Symbol;Acc:MGI:5456223]	0	0	0	0	0	0	0	0	0	0	NA	NA	NA	NA	NA	no	0	NA	NA	NA	NA	NA	no	0	NA	NA	NA	NA	NA	no
Ano7	1	93373930	ENSMUSG00000034107	anoctamin 7 [Source:MGI Symbol;Acc:MGI:3052714]	0	0	0	0	0	0	0	0	0	0	NA	NA	NA	NA	NA	no	0	NA	NA	NA	NA	NA	no	0	NA	NA	NA	NA	NA	no
Hdlbp	1	93405940	ENSMUSG00000034088	high density lipoprotein (HDL) binding protein [Source:MGI Symbol;Acc:MGI:99256]	99	18	7	398	7	41	136	176	7	83.4848	-0.773134	1.41807	-0.545202	0.585615	1	no	83.4848	0.970412	1.41494	0.685831	0.49282	1	no	83.4848	-1.74355	1.41743	-1.23008	0.218667	0.985344	no
Gm17415	1	93421700	ENSMUSG00000090489	predicted gene, 17415 [Source:MGI Symbol;Acc:MGI:4937049]	1	0	3	1	0	2	0	0	0	0.723802	2.00053	2.39691	0.834629	0.403926	NA	no	0.723802	1.63371	2.39858	0.681114	0.495799	NA	no	0.723802	0.366823	2.3889	0.153553	0.877962	NA	no
Sept2	1	93478964	ENSMUSG00000026276	septin 2 [Source:MGI Symbol;Acc:MGI:97298]	0	0	0	12	0	1	0	0	1	1.50877	-0.424456	2.40249	-0.176673	0.859765	NA	no	1.50877	2.47044	2.38488	1.03588	0.30026	NA	no	1.50877	-2.89489	2.38889	-1.21181	0.225584	NA	no
Sept2	1	93478993	ENSMUSG00000112508	septin 2 [Source:MGI Symbol;Acc:MGI:97298]	0	0	0	0	0	0	0	0	0	0	NA	NA	NA	NA	NA	no	0	NA	NA	NA	NA	NA	no	0	NA	NA	NA	NA	NA	no
Farp2	1	93512079	ENSMUSG00000034066	FERM, RhoGEF and pleckstrin domain protein 2 [Source:MGI Symbol;Acc:MGI:2385126]	0	0	0	0	0	0	0	0	0	0	NA	NA	NA	NA	NA	no	0	NA	NA	NA	NA	NA	no	0	NA	NA	NA	NA	NA	no
Gm37250	1	93531815	ENSMUSG00000103854	predicted gene, 37250 [Source:MGI Symbol;Acc:MGI:5610478]	0	0	0	0	0	0	0	0	0	0	NA	NA	NA	NA	NA	no	0	NA	NA	NA	NA	NA	no	0	NA	NA	NA	NA	NA	no
Stk25	1	93619751	ENSMUSG00000026277	serine/threonine kinase 25 (yeast) [Source:MGI Symbol;Acc:MGI:1891699]	0	0	0	0	0	0	0	0	0	0	NA	NA	NA	NA	NA	no	0	NA	NA	NA	NA	NA	no	0	NA	NA	NA	NA	NA	no
Gm28536	1	93635193	ENSMUSG00000100927	predicted gene 28536 [Source:MGI Symbol;Acc:MGI:5579242]	0	0	0	0	0	0	0	0	0	0	NA	NA	NA	NA	NA	no	0	NA	NA	NA	NA	NA	no	0	NA	NA	NA	NA	NA	no
Bok	1	93685660	ENSMUSG00000026278	BCL2-related ovarian killer [Source:MGI Symbol;Acc:MGI:1858494]	1	0	2	0	0	1	3	0	0	0.605672	0.427482	2.39143	0.178756	0.858129	NA	no	0.605672	-0.507223	2.39861	-0.211465	0.832524	NA	no	0.605672	0.934706	2.39922	0.389588	0.696842	NA	no
Thap4	1	93701935	ENSMUSG00000026279	THAP domain containing 4 [Source:MGI Symbol;Acc:MGI:1914276]	1	2	101	0	0	0	0	42	13	16.2459	1.11342	2.05751	0.541147	0.588406	1	no	16.2459	-4.57805	2.14507	-2.13422	0.0328251	0.39687	no	16.2459	5.69146	2.144	2.6546	0.00794026	0.196929	no
Gm10550	1	93731104	ENSMUSG00000101952	predicted gene 10550 [Source:MGI Symbol;Acc:MGI:3704193]	0	0	0	0	0	0	0	0	0	0	NA	NA	NA	NA	NA	no	0	NA	NA	NA	NA	NA	no	0	NA	NA	NA	NA	NA	no
Atg4b	1	93751500	ENSMUSG00000026280	autophagy related 4B, cysteine peptidase [Source:MGI Symbol;Acc:MGI:1913865]	41	56	232	2	31	198	22	40	55	70.0109	1.72634	1.30544	1.32242	0.186029	0.807391	no	70.0109	0.996778	1.30631	0.763049	0.445434	1	no	70.0109	0.729561	1.30381	0.55956	0.575779	1	no
Dtymk	1	93792576	ENSMUSG00000026281	deoxythymidylate kinase [Source:MGI Symbol;Acc:MGI:108396]	90	80	6	0	23	51	1	1	30	31.0668	2.25454	1.69557	1.32967	0.183628	0.802727	no	31.0668	0.941727	1.69809	0.55458	0.579182	1	no	31.0668	1.31282	1.69307	0.775405	0.438101	1	no
Ing5	1	93803965	ENSMUSG00000026283	inhibitor of growth family, member 5 [Source:MGI Symbol;Acc:MGI:1922816]	27	0	0	69	195	151	166	0	8	56.6008	-1.74892	1.8814	-0.929583	0.352587	0.956133	no	56.6008	1.55802	1.87408	0.831353	0.405774	1	no	56.6008	-3.30694	1.88042	-1.75862	0.0786424	0.635873	no
Gm22089	1	93808570	ENSMUSG00000088961	predicted gene, 22089 [Source:MGI Symbol;Acc:MGI:5451866]	0	0	0	0	0	0	0	0	0	0	NA	NA	NA	NA	NA	no	0	NA	NA	NA	NA	NA	no	0	NA	NA	NA	NA	NA	no
D2hgdh	1	93824909	ENSMUSG00000073609	D-2-hydroxyglutarate dehydrogenase [Source:MGI Symbol;Acc:MGI:2138209]	127	0	31	0	0	7	0	0	0	16.0386	5.46871	2.32662	2.3505	0.0187484	0.259069	no	16.0386	2.12638	2.33386	0.911098	0.362244	1	no	16.0386	3.34234	2.30628	1.44923	0.147273	0.849503	no
Gal3st2	1	93861306	ENSMUSG00000094651	galactose-3-O-sulfotransferase 2 [Source:MGI Symbol;Acc:MGI:2685834]	0	0	0	0	0	0	0	0	0	0	NA	NA	NA	NA	NA	no	0	NA	NA	NA	NA	NA	no	0	NA	NA	NA	NA	NA	no
Gm18666	1	93906244	ENSMUSG00000101660	predicted gene, 18666 [Source:MGI Symbol;Acc:MGI:5010851]	0	0	0	0	0	0	0	0	0	0	NA	NA	NA	NA	NA	no	0	NA	NA	NA	NA	NA	no	0	NA	NA	NA	NA	NA	no
Gal3st2b	1	93918311	ENSMUSG00000093805	galactose-3-O-sulfotransferase 2B [Source:MGI Symbol;Acc:MGI:3711964]	0	0	0	0	0	0	0	0	0	0	NA	NA	NA	NA	NA	no	0	NA	NA	NA	NA	NA	no	0	NA	NA	NA	NA	NA	no
Gm7889	1	93975353	ENSMUSG00000099624	predicted gene 7889 [Source:MGI Symbol;Acc:MGI:3648247]	0	0	0	0	0	0	0	0	0	0	NA	NA	NA	NA	NA	no	0	NA	NA	NA	NA	NA	no	0	NA	NA	NA	NA	NA	no
Gal3st2c	1	93990509	ENSMUSG00000073608	galactose-3-O-sulfotransferase 2C [Source:MGI Symbol;Acc:MGI:3646771]	0	0	0	0	0	0	0	0	0	0	NA	NA	NA	NA	NA	no	0	NA	NA	NA	NA	NA	no	0	NA	NA	NA	NA	NA	no
Neu4	1	94020451	ENSMUSG00000034000	sialidase 4 [Source:MGI Symbol;Acc:MGI:2661364]	0	0	0	0	0	0	0	0	0	0	NA	NA	NA	NA	NA	no	0	NA	NA	NA	NA	NA	no	0	NA	NA	NA	NA	NA	no
Pdcd1	1	94038305	ENSMUSG00000026285	programmed cell death 1 [Source:MGI Symbol;Acc:MGI:104879]	4	122	134	144	171	511	227	478	285	195.494	-1.23897	1.13197	-1.09452	0.273726	0.896907	no	195.494	-0.00122673	1.13042	-0.0010852	0.999134	1	no	195.494	-1.23774	1.13216	-1.09326	0.274279	1	no
Gm7891	1	94204417	ENSMUSG00000100990	predicted gene 7891 [Source:MGI Symbol;Acc:MGI:3645230]	0	0	0	0	0	0	0	0	0	0	NA	NA	NA	NA	NA	no	0	NA	NA	NA	NA	NA	no	0	NA	NA	NA	NA	NA	no
Gm7895	1	94468715	ENSMUSG00000100347	predicted gene 7895 [Source:MGI Symbol;Acc:MGI:3648340]	0	0	0	0	0	0	0	0	0	0	NA	NA	NA	NA	NA	no	0	NA	NA	NA	NA	NA	no	0	NA	NA	NA	NA	NA	no
Gm23389	1	94615636	ENSMUSG00000077413	predicted gene, 23389 [Source:MGI Symbol;Acc:MGI:5453166]	0	0	0	0	0	0	0	0	0	0	NA	NA	NA	NA	NA	no	0	NA	NA	NA	NA	NA	no	0	NA	NA	NA	NA	NA	no
4930440C22Rik	1	94797083	ENSMUSG00000100518	RIKEN cDNA 4930440C22 gene [Source:MGI Symbol;Acc:MGI:1921939]	0	0	0	0	0	0	0	0	0	0	NA	NA	NA	NA	NA	no	0	NA	NA	NA	NA	NA	no	0	NA	NA	NA	NA	NA	no
Gm23181	1	95039934	ENSMUSG00000089310	predicted gene, 23181 [Source:MGI Symbol;Acc:MGI:5452958]	0	0	0	0	0	0	0	0	0	0	NA	NA	NA	NA	NA	no	0	NA	NA	NA	NA	NA	no	0	NA	NA	NA	NA	NA	no
Gm5264	1	95255963	ENSMUSG00000099592	predicted gene 5264 [Source:MGI Symbol;Acc:MGI:3646340]	0	0	0	0	0	0	0	0	0	0	NA	NA	NA	NA	NA	no	0	NA	NA	NA	NA	NA	no	0	NA	NA	NA	NA	NA	no
Fam174a	1	95313623	ENSMUSG00000051185	family with sequence similarity 174, member A [Source:MGI Symbol;Acc:MGI:1914948]	122	107	72	39	88	1	426	14	96	87.6432	-0.157103	1.33011	-0.118113	0.905978	1	no	87.6432	-1.38342	1.33214	-1.03849	0.299041	1	no	87.6432	1.22631	1.33282	0.920087	0.357527	1	no
BC055308	1	95328681	ENSMUSG00000103973	cDNA sequence BC055308 [Source:MGI Symbol;Acc:MGI:3039612]	0	1	0	0	0	0	1	0	0	0.207696	0.29616	2.40591	0.123097	0.902031	NA	no	0.207696	-0.363204	2.40591	-0.150963	0.880005	NA	no	0.207696	0.659364	2.40591	0.27406	0.784039	NA	no
Gm15427	1	95498621	ENSMUSG00000081051	predicted pseudogene 15427 [Source:MGI Symbol;Acc:MGI:3642341]	158	103	128	126	101	115	368	277	219	147.405	-0.634542	0.478783	-1.32532	0.185064	0.806247	no	147.405	-0.948186	0.479351	-1.97806	0.0479215	0.488906	no	147.405	0.313645	0.482329	0.650271	0.515517	1	no
St8sia4	1	95587682	ENSMUSG00000040710	ST8 alpha-N-acetyl-neuraminide alpha-2,8-sialyltransferase 4 [Source:MGI Symbol;Acc:MGI:106018]	1517	1032	1003	522	677	447	886	332	555	714.915	1.47408	0.611017	2.41251	0.0158433	0.242643	no	714.915	0.259806	0.611509	0.42486	0.670939	1	no	714.915	1.21428	0.611054	1.98718	0.0469022	0.497069	no
Gm37642	1	95646774	ENSMUSG00000103197	predicted gene, 37642 [Source:MGI Symbol;Acc:MGI:5610870]	51	66	0	230	301	0	0	30	196	94.8263	-0.549373	2.0089	-0.27347	0.784492	1	no	94.8263	1.03513	2.00799	0.515505	0.606201	1	no	94.8263	-1.5845	2.00866	-0.788837	0.430207	1	no
4930598F16Rik	1	95701184	ENSMUSG00000100777	RIKEN cDNA 4930598F16 gene [Source:MGI Symbol;Acc:MGI:1922631]	0	0	0	0	0	0	0	0	0	0	NA	NA	NA	NA	NA	no	0	NA	NA	NA	NA	NA	no	0	NA	NA	NA	NA	NA	no
Gm37761	1	95738196	ENSMUSG00000102718	predicted gene, 37761 [Source:MGI Symbol;Acc:MGI:5610989]	0	0	0	0	0	0	0	0	0	0	NA	NA	NA	NA	NA	no	0	NA	NA	NA	NA	NA	no	0	NA	NA	NA	NA	NA	no
Gm22360	1	95832129	ENSMUSG00000095955	predicted gene, 22360 [Source:MGI Symbol;Acc:MGI:5452137]	0	0	0	0	0	0	1	0	0	0.065138	-0.270919	2.40591	-0.112606	0.910343	NA	no	0.065138	-0.363204	2.40591	-0.150963	0.880005	NA	no	0.065138	0	2.40591	0	1	NA	no
1700063A18Rik	1	95990659	ENSMUSG00000100062	RIKEN cDNA 1700063A18 gene [Source:MGI Symbol;Acc:MGI:1920704]	0	0	0	0	0	0	0	0	0	0	NA	NA	NA	NA	NA	no	0	NA	NA	NA	NA	NA	no	0	NA	NA	NA	NA	NA	no
Gm24586	1	96266853	ENSMUSG00000080345	predicted gene, 24586 [Source:MGI Symbol;Acc:MGI:5454363]	0	0	0	0	0	0	0	0	0	0	NA	NA	NA	NA	NA	no	0	NA	NA	NA	NA	NA	no	0	NA	NA	NA	NA	NA	no
Gm22917	1	96303146	ENSMUSG00000096585	predicted gene, 22917 [Source:MGI Symbol;Acc:MGI:5452694]	0	0	0	0	0	0	0	0	0	0	NA	NA	NA	NA	NA	no	0	NA	NA	NA	NA	NA	no	0	NA	NA	NA	NA	NA	no
Gm37076	1	96313242	ENSMUSG00000102658	predicted gene, 37076 [Source:MGI Symbol;Acc:MGI:5610304]	0	0	0	0	0	0	0	0	0	0	NA	NA	NA	NA	NA	no	0	NA	NA	NA	NA	NA	no	0	NA	NA	NA	NA	NA	no
Gm29601	1	96543059	ENSMUSG00000100336	predicted gene 29601 [Source:MGI Symbol;Acc:MGI:5580307]	0	0	0	0	0	0	0	0	0	0	NA	NA	NA	NA	NA	no	0	NA	NA	NA	NA	NA	no	0	NA	NA	NA	NA	NA	no
4930533P14Rik	1	96612057	ENSMUSG00000100589	RIKEN cDNA 4930533P14 gene [Source:MGI Symbol;Acc:MGI:1922409]	0	0	0	0	0	0	0	0	0	0	NA	NA	NA	NA	NA	no	0	NA	NA	NA	NA	NA	no	0	NA	NA	NA	NA	NA	no
Gm26245	1	96617099	ENSMUSG00000095610	predicted gene, 26245 [Source:MGI Symbol;Acc:MGI:5456022]	0	0	0	0	0	0	0	0	0	0	NA	NA	NA	NA	NA	no	0	NA	NA	NA	NA	NA	no	0	NA	NA	NA	NA	NA	no
Gm1833	1	96645420	ENSMUSG00000100362	predicted gene 1833 [Source:MGI Symbol;Acc:MGI:3037691]	0	0	0	0	0	0	0	0	0	0	NA	NA	NA	NA	NA	no	0	NA	NA	NA	NA	NA	no	0	NA	NA	NA	NA	NA	no
Gm26078	1	96762031	ENSMUSG00000077255	predicted gene, 26078 [Source:MGI Symbol;Acc:MGI:5455855]	0	0	0	0	0	0	0	0	0	0	NA	NA	NA	NA	NA	no	0	NA	NA	NA	NA	NA	no	0	NA	NA	NA	NA	NA	no
Slco4c1	1	96816270	ENSMUSG00000040693	solute carrier organic anion transporter family, member 4C1 [Source:MGI Symbol;Acc:MGI:2442784]	0	0	0	0	0	0	0	0	0	0	NA	NA	NA	NA	NA	no	0	NA	NA	NA	NA	NA	no	0	NA	NA	NA	NA	NA	no
Panct2	1	96871126	ENSMUSG00000097814	pluripotency-associated noncoding transcript 2 [Source:MGI Symbol;Acc:MGI:3643517]	0	0	0	0	0	0	0	0	0	0	NA	NA	NA	NA	NA	no	0	NA	NA	NA	NA	NA	no	0	NA	NA	NA	NA	NA	no
Slco6b1	1	96906176	ENSMUSG00000045463	solute carrier organic anion transporter family, member 6b1 [Source:MGI Symbol;Acc:MGI:1915104]	0	0	0	0	0	0	0	0	0	0	NA	NA	NA	NA	NA	no	0	NA	NA	NA	NA	NA	no	0	NA	NA	NA	NA	NA	no
Gm9499	1	97001820	ENSMUSG00000097480	predicted gene 9499 [Source:MGI Symbol;Acc:MGI:3779909]	0	0	0	0	0	0	0	0	0	0	NA	NA	NA	NA	NA	no	0	NA	NA	NA	NA	NA	no	0	NA	NA	NA	NA	NA	no
Gm28901	1	97024516	ENSMUSG00000100454	predicted gene 28901 [Source:MGI Symbol;Acc:MGI:5579607]	0	0	0	0	0	0	0	0	0	0	NA	NA	NA	NA	NA	no	0	NA	NA	NA	NA	NA	no	0	NA	NA	NA	NA	NA	no
Gm6430	1	97024681	ENSMUSG00000044757	predicted gene 6430 [Source:MGI Symbol;Acc:MGI:3648857]	0	0	0	0	0	0	0	0	0	0	NA	NA	NA	NA	NA	no	0	NA	NA	NA	NA	NA	no	0	NA	NA	NA	NA	NA	no
Slco6c1	1	97059038	ENSMUSG00000026331	solute carrier organic anion transporter family, member 6c1 [Source:MGI Symbol;Acc:MGI:1921691]	0	0	0	0	0	0	0	0	0	0	NA	NA	NA	NA	NA	no	0	NA	NA	NA	NA	NA	no	0	NA	NA	NA	NA	NA	no
Gm7133	1	97162860	ENSMUSG00000100484	predicted gene 7133 [Source:MGI Symbol;Acc:MGI:3643070]	0	0	0	0	0	0	0	0	0	0	NA	NA	NA	NA	NA	no	0	NA	NA	NA	NA	NA	no	0	NA	NA	NA	NA	NA	no
Gm7135	1	97346475	ENSMUSG00000101348	predicted gene 7135 [Source:MGI Symbol;Acc:MGI:3647710]	0	0	0	0	0	0	0	0	0	0	NA	NA	NA	NA	NA	no	0	NA	NA	NA	NA	NA	no	0	NA	NA	NA	NA	NA	no
Gm37171	1	97544264	ENSMUSG00000103179	predicted gene, 37171 [Source:MGI Symbol;Acc:MGI:5610399]	0	0	0	0	0	0	0	0	0	0	NA	NA	NA	NA	NA	no	0	NA	NA	NA	NA	NA	no	0	NA	NA	NA	NA	NA	no
D1Ertd622e	1	97606318	ENSMUSG00000044768	DNA segment, Chr 1, ERATO Doi 622, expressed [Source:MGI Symbol;Acc:MGI:1277184]	0	0	20	37	0	8	414	0	0	33.982	-2.37449	2.3163	-1.02512	NA	NA	no	33.982	-1.72866	2.3154	-0.746592	NA	NA	no	33.982	-0.645839	2.31719	-0.278716	NA	NA	no
Ppip5k2	1	97706048	ENSMUSG00000040648	diphosphoinositol pentakisphosphate kinase 2 [Source:MGI Symbol;Acc:MGI:2142810]	33	0	3	195	94	0	150	332	129	83.4258	-3.27477	1.6731	-1.95731	0.0503113	0.447859	no	83.4258	-0.557024	1.66537	-0.334475	0.738021	1	no	83.4258	-2.71775	1.67365	-1.62385	0.104408	0.731055	no
Gin1	1	97770172	ENSMUSG00000026333	gypsy retrotransposon integrase 1 [Source:MGI Symbol;Acc:MGI:2182036]	2	0	0	0	0	0	109	0	0	7.28778	-3.50207	2.37501	-1.47455	NA	NA	no	7.28778	-4.58426	2.38479	-1.92229	NA	NA	no	7.28778	1.0822	2.39753	0.451379	NA	NA	no
Pam	1	97795114	ENSMUSG00000026335	peptidylglycine alpha-amidating monooxygenase [Source:MGI Symbol;Acc:MGI:97475]	9	13	3	109	3	2	12	2	3	16.6845	1.10949	1.53225	0.724091	NA	NA	no	16.6845	2.94015	1.52028	1.93395	NA	NA	no	16.6845	-1.83066	1.51174	-1.21096	NA	NA	no
Gm37140	1	97878382	ENSMUSG00000104140	predicted gene, 37140 [Source:MGI Symbol;Acc:MGI:5610368]	0	0	1	0	0	0	0	0	0	0.111927	0.863238	2.40591	0.358799	0.719746	NA	no	0.111927	0	2.40591	0	1	NA	no	0.111927	0.659364	2.40591	0.27406	0.784039	NA	no
Gm25413	1	97936400	ENSMUSG00000089169	predicted gene, 25413 [Source:MGI Symbol;Acc:MGI:5455190]	0	0	0	0	0	0	0	0	0	0	NA	NA	NA	NA	NA	no	0	NA	NA	NA	NA	NA	no	0	NA	NA	NA	NA	NA	no
Gm3531	1	97948901	ENSMUSG00000089782	predicted pseudogene 3531 [Source:MGI Symbol;Acc:MGI:3781708]	0	0	4	0	0	0	0	0	0	0.447708	2.11274	2.39856	0.880839	0.378405	NA	no	0.447708	0	2.40591	0	1	NA	no	0.447708	1.90887	2.39856	0.79584	0.426125	NA	no
B230216N24Rik	1	98031116	ENSMUSG00000089706	RIKEN cDNA B230216N24 gene [Source:MGI Symbol;Acc:MGI:1925853]	0	0	0	0	76	2	0	0	0	8.32904	0	2.40591	0	NA	NA	no	8.32904	5.49465	2.38522	2.30362	NA	NA	no	8.32904	-5.36886	2.38522	-2.25089	NA	NA	no
Gm24465	1	98049822	ENSMUSG00000096085	predicted gene, 24465 [Source:MGI Symbol;Acc:MGI:5454242]	0	0	0	0	0	0	0	0	0	0	NA	NA	NA	NA	NA	no	0	NA	NA	NA	NA	NA	no	0	NA	NA	NA	NA	NA	no
1810006J02Rik	1	98131456	ENSMUSG00000100182	RIKEN cDNA 1810006J02 gene [Source:MGI Symbol;Acc:MGI:1916280]	0	0	376	84	0	0	0	0	0	51.2473	4.43505	2.3613	1.87822	NA	NA	no	51.2473	2.85893	2.36168	1.21055	NA	NA	no	51.2473	1.57612	2.35839	0.668302	NA	NA	no
Gm29461	1	98173648	ENSMUSG00000100711	predicted gene 29461 [Source:MGI Symbol;Acc:MGI:5580167]	0	0	0	0	0	0	0	0	0	0	NA	NA	NA	NA	NA	no	0	NA	NA	NA	NA	NA	no	0	NA	NA	NA	NA	NA	no
Gm7952	1	98263523	ENSMUSG00000097608	predicted gene 7952 [Source:MGI Symbol;Acc:MGI:3648772]	0	0	0	0	0	0	0	0	0	0	NA	NA	NA	NA	NA	no	0	NA	NA	NA	NA	NA	no	0	NA	NA	NA	NA	NA	no
Gm29462	1	98267151	ENSMUSG00000099634	predicted gene 29462 [Source:MGI Symbol;Acc:MGI:5580168]	0	0	0	0	0	1	0	0	0	0.0925369	0	2.40591	0	1	NA	no	0.0925369	0.770953	2.40591	0.320441	0.748634	NA	no	0.0925369	-0.474794	2.40591	-0.197345	0.843558	NA	no
Slco6d1	1	98421124	ENSMUSG00000026336	solute carrier organic anion transporter family, member 6d1 [Source:MGI Symbol;Acc:MGI:1918116]	0	0	0	0	0	0	0	0	0	0	NA	NA	NA	NA	NA	no	0	NA	NA	NA	NA	NA	no	0	NA	NA	NA	NA	NA	no
Gm3555	1	98457768	ENSMUSG00000089791	predicted pseudogene 3555 [Source:MGI Symbol;Acc:MGI:3781732]	0	0	0	0	0	0	2	0	0	0.130276	-0.731347	2.40477	-0.304123	0.761034	NA	no	0.130276	-0.823632	2.40477	-0.342498	0.731976	NA	no	0.130276	0	2.40591	0	1	NA	no
Gm26134	1	98549451	ENSMUSG00000096193	predicted gene, 26134 [Source:MGI Symbol;Acc:MGI:5455911]	0	0	0	0	0	0	0	0	0	0	NA	NA	NA	NA	NA	no	0	NA	NA	NA	NA	NA	no	0	NA	NA	NA	NA	NA	no
Gm7967	1	98589517	ENSMUSG00000100009	predicted gene 7967 [Source:MGI Symbol;Acc:MGI:3644984]	0	0	0	0	0	0	0	0	0	0	NA	NA	NA	NA	NA	no	0	NA	NA	NA	NA	NA	no	0	NA	NA	NA	NA	NA	no
Gm29460	1	98764841	ENSMUSG00000099686	predicted gene 29460 [Source:MGI Symbol;Acc:MGI:5580166]	0	0	0	0	0	0	0	0	0	0	NA	NA	NA	NA	NA	no	0	NA	NA	NA	NA	NA	no	0	NA	NA	NA	NA	NA	no
Gm23434	1	99017364	ENSMUSG00000087804	predicted gene, 23434 [Source:MGI Symbol;Acc:MGI:5453211]	0	0	0	0	0	0	0	0	0	0	NA	NA	NA	NA	NA	no	0	NA	NA	NA	NA	NA	no	0	NA	NA	NA	NA	NA	no
Gm18248	1	99638396	ENSMUSG00000099453	predicted gene, 18248 [Source:MGI Symbol;Acc:MGI:5010433]	0	0	0	0	0	0	0	0	0	0	NA	NA	NA	NA	NA	no	0	NA	NA	NA	NA	NA	no	0	NA	NA	NA	NA	NA	no
Cntnap5b	1	99772765	ENSMUSG00000067028	contactin associated protein-like 5B [Source:MGI Symbol;Acc:MGI:3664583]	0	0	0	0	0	0	0	0	0	0	NA	NA	NA	NA	NA	no	0	NA	NA	NA	NA	NA	no	0	NA	NA	NA	NA	NA	no
Tdpx-ps1	1	99790429	ENSMUSG00000082431	thioredoxin peroxidase, pseudogene 1 [Source:MGI Symbol;Acc:MGI:1321403]	2	0	5	0	0	0	1	0	0	0.812506	2.04866	2.39248	0.856292	0.391836	NA	no	0.812506	-0.336245	2.40519	-0.1398	0.888818	NA	no	0.812506	2.38491	2.3933	0.996494	0.31901	NA	no
Gm37877	1	99847984	ENSMUSG00000104104	predicted gene, 37877 [Source:MGI Symbol;Acc:MGI:5611105]	0	0	0	0	0	0	0	0	0	0	NA	NA	NA	NA	NA	no	0	NA	NA	NA	NA	NA	no	0	NA	NA	NA	NA	NA	no
Gm19029	1	100006021	ENSMUSG00000100662	predicted gene, 19029 [Source:MGI Symbol;Acc:MGI:5011214]	0	0	0	0	0	0	0	0	0	0	NA	NA	NA	NA	NA	no	0	NA	NA	NA	NA	NA	no	0	NA	NA	NA	NA	NA	no
Gm23602	1	100252917	ENSMUSG00000087883	predicted gene, 23602 [Source:MGI Symbol;Acc:MGI:5453379]	0	0	0	0	0	0	0	0	0	0	NA	NA	NA	NA	NA	no	0	NA	NA	NA	NA	NA	no	0	NA	NA	NA	NA	NA	no
Gm29668	1	100282329	ENSMUSG00000099835	predicted gene 29668 [Source:MGI Symbol;Acc:MGI:5580374]	0	0	0	0	0	0	0	0	0	0	NA	NA	NA	NA	NA	no	0	NA	NA	NA	NA	NA	no	0	NA	NA	NA	NA	NA	no
Gm29667	1	100282791	ENSMUSG00000100794	predicted gene 29667 [Source:MGI Symbol;Acc:MGI:5580373]	0	0	0	0	0	0	0	0	0	0	NA	NA	NA	NA	NA	no	0	NA	NA	NA	NA	NA	no	0	NA	NA	NA	NA	NA	no
Gm18700	1	100597075	ENSMUSG00000099427	predicted gene, 18700 [Source:MGI Symbol;Acc:MGI:5010885]	0	0	0	0	0	0	0	0	0	0	NA	NA	NA	NA	NA	no	0	NA	NA	NA	NA	NA	no	0	NA	NA	NA	NA	NA	no
Gm18185	1	100643582	ENSMUSG00000099892	predicted gene, 18185 [Source:MGI Symbol;Acc:MGI:5010370]	0	0	0	0	0	0	0	0	0	0	NA	NA	NA	NA	NA	no	0	NA	NA	NA	NA	NA	no	0	NA	NA	NA	NA	NA	no
Gm29334	1	100653800	ENSMUSG00000100977	predicted gene 29334 [Source:MGI Symbol;Acc:MGI:5580040]	0	0	0	0	0	0	0	0	0	0	NA	NA	NA	NA	NA	no	0	NA	NA	NA	NA	NA	no	0	NA	NA	NA	NA	NA	no
Gm25537	1	100861793	ENSMUSG00000077039	predicted gene, 25537 [Source:MGI Symbol;Acc:MGI:5455314]	0	0	0	0	0	0	0	0	0	0	NA	NA	NA	NA	NA	no	0	NA	NA	NA	NA	NA	no	0	NA	NA	NA	NA	NA	no
Gm20268	1	101155809	ENSMUSG00000100684	predicted gene, 20268 [Source:MGI Symbol;Acc:MGI:5012453]	0	0	0	0	0	0	0	0	0	0	NA	NA	NA	NA	NA	no	0	NA	NA	NA	NA	NA	no	0	NA	NA	NA	NA	NA	no
Gm28801	1	101371628	ENSMUSG00000100088	predicted gene 28801 [Source:MGI Symbol;Acc:MGI:5579507]	0	0	0	0	0	0	0	0	0	0	NA	NA	NA	NA	NA	no	0	NA	NA	NA	NA	NA	no	0	NA	NA	NA	NA	NA	no
Psmb6-ps2	1	101385886	ENSMUSG00000100222	proteasome (prosome, macropain) subunit, beta type 6, pseudogene 2 [Source:MGI Symbol;Acc:MGI:109264]	0	0	0	0	0	0	1	0	0	0.065138	-0.270919	2.40591	-0.112606	0.910343	NA	no	0.065138	-0.363204	2.40591	-0.150963	0.880005	NA	no	0.065138	0	2.40591	0	1	NA	no
Gm18969	1	101753814	ENSMUSG00000100065	predicted gene, 18969 [Source:MGI Symbol;Acc:MGI:5011154]	0	0	0	0	0	0	0	0	0	0	NA	NA	NA	NA	NA	no	0	NA	NA	NA	NA	NA	no	0	NA	NA	NA	NA	NA	no
Gm28188	1	101880506	ENSMUSG00000100349	predicted gene 28188 [Source:MGI Symbol;Acc:MGI:5578894]	0	0	0	0	0	0	0	0	0	0	NA	NA	NA	NA	NA	no	0	NA	NA	NA	NA	NA	no	0	NA	NA	NA	NA	NA	no
Gm28187	1	101892958	ENSMUSG00000099375	predicted gene 28187 [Source:MGI Symbol;Acc:MGI:5578893]	0	0	0	0	0	0	0	0	0	0	NA	NA	NA	NA	NA	no	0	NA	NA	NA	NA	NA	no	0	NA	NA	NA	NA	NA	no
Gm24122	1	102106449	ENSMUSG00000077295	predicted gene, 24122 [Source:MGI Symbol;Acc:MGI:5453899]	0	0	0	0	0	0	0	0	0	0	NA	NA	NA	NA	NA	no	0	NA	NA	NA	NA	NA	no	0	NA	NA	NA	NA	NA	no
Gm28623	1	102161367	ENSMUSG00000099770	predicted gene 28623 [Source:MGI Symbol;Acc:MGI:5579329]	0	0	0	0	0	0	0	0	0	0	NA	NA	NA	NA	NA	no	0	NA	NA	NA	NA	NA	no	0	NA	NA	NA	NA	NA	no
Gm23036	1	102413923	ENSMUSG00000088510	predicted gene, 23036 [Source:MGI Symbol;Acc:MGI:5452813]	0	0	0	0	0	0	0	0	0	0	NA	NA	NA	NA	NA	no	0	NA	NA	NA	NA	NA	no	0	NA	NA	NA	NA	NA	no
Gm3116	1	102449353	ENSMUSG00000101890	predicted gene 3116 [Source:MGI Symbol;Acc:MGI:3781292]	0	0	0	0	0	0	0	0	0	0	NA	NA	NA	NA	NA	no	0	NA	NA	NA	NA	NA	no	0	NA	NA	NA	NA	NA	no
Gm20281	1	102458656	ENSMUSG00000099989	predicted gene, 20281 [Source:MGI Symbol;Acc:MGI:5012466]	0	0	0	0	0	0	3	0	0	0.195414	-1.04544	2.40202	-0.435235	0.663392	NA	no	0.195414	-1.13773	2.40202	-0.473654	0.635746	NA	no	0.195414	0	2.40591	0	1	NA	no
Gm22034	1	102953415	ENSMUSG00000087908	predicted gene, 22034 [Source:MGI Symbol;Acc:MGI:5451811]	0	0	0	0	0	0	0	0	0	0	NA	NA	NA	NA	NA	no	0	NA	NA	NA	NA	NA	no	0	NA	NA	NA	NA	NA	no
Gm18728	1	103171926	ENSMUSG00000100955	predicted gene, 18728 [Source:MGI Symbol;Acc:MGI:5010913]	0	0	0	0	0	0	0	0	0	0	NA	NA	NA	NA	NA	no	0	NA	NA	NA	NA	NA	no	0	NA	NA	NA	NA	NA	no
Gm23965	1	103236626	ENSMUSG00000088594	predicted gene, 23965 [Source:MGI Symbol;Acc:MGI:5453742]	0	0	0	0	0	0	0	0	0	0	NA	NA	NA	NA	NA	no	0	NA	NA	NA	NA	NA	no	0	NA	NA	NA	NA	NA	no
Gm29141	1	103363986	ENSMUSG00000099469	predicted gene 29141 [Source:MGI Symbol;Acc:MGI:5579847]	0	0	0	0	0	0	0	0	0	0	NA	NA	NA	NA	NA	no	0	NA	NA	NA	NA	NA	no	0	NA	NA	NA	NA	NA	no
Gm37789	1	103724345	ENSMUSG00000102325	predicted gene, 37789 [Source:MGI Symbol;Acc:MGI:5611017]	0	0	0	0	0	0	0	0	0	0	NA	NA	NA	NA	NA	no	0	NA	NA	NA	NA	NA	no	0	NA	NA	NA	NA	NA	no
Gm18447	1	104311721	ENSMUSG00000101297	predicted gene, 18447 [Source:MGI Symbol;Acc:MGI:5010632]	0	0	0	0	0	0	0	0	0	0	NA	NA	NA	NA	NA	no	0	NA	NA	NA	NA	NA	no	0	NA	NA	NA	NA	NA	no
Gm29140	1	104470941	ENSMUSG00000100059	predicted gene 29140 [Source:MGI Symbol;Acc:MGI:5579846]	0	0	0	0	0	0	0	0	0	0	NA	NA	NA	NA	NA	no	0	NA	NA	NA	NA	NA	no	0	NA	NA	NA	NA	NA	no
Gm23537	1	104485957	ENSMUSG00000088161	predicted gene, 23537 [Source:MGI Symbol;Acc:MGI:5453314]	0	0	0	0	0	0	0	0	0	0	NA	NA	NA	NA	NA	no	0	NA	NA	NA	NA	NA	no	0	NA	NA	NA	NA	NA	no
Gm5260	1	104513001	ENSMUSG00000099464	predicted gene 5260 [Source:MGI Symbol;Acc:MGI:3644614]	0	0	0	0	0	0	0	0	0	0	NA	NA	NA	NA	NA	no	0	NA	NA	NA	NA	NA	no	0	NA	NA	NA	NA	NA	no
Gm29592	1	104609524	ENSMUSG00000100935	predicted gene 29592 [Source:MGI Symbol;Acc:MGI:5580298]	0	0	0	0	0	0	0	0	0	0	NA	NA	NA	NA	NA	no	0	NA	NA	NA	NA	NA	no	0	NA	NA	NA	NA	NA	no
Gm29011	1	104632584	ENSMUSG00000099801	predicted gene 29011 [Source:MGI Symbol;Acc:MGI:5579717]	0	0	0	0	0	0	0	0	0	0	NA	NA	NA	NA	NA	no	0	NA	NA	NA	NA	NA	no	0	NA	NA	NA	NA	NA	no
Cdh20	1	104768529	ENSMUSG00000050840	cadherin 20 [Source:MGI Symbol;Acc:MGI:1346069]	0	0	0	0	0	0	0	0	0	0	NA	NA	NA	NA	NA	no	0	NA	NA	NA	NA	NA	no	0	NA	NA	NA	NA	NA	no
Gm38031	1	104776114	ENSMUSG00000103991	predicted gene, 38031 [Source:MGI Symbol;Acc:MGI:5611259]	0	0	0	0	0	0	0	0	0	0	NA	NA	NA	NA	NA	no	0	NA	NA	NA	NA	NA	no	0	NA	NA	NA	NA	NA	no
n-R5s216	1	104880924	ENSMUSG00000084704	nuclear encoded rRNA 5S 216 [Source:MGI Symbol;Acc:MGI:4422081]	0	0	0	0	0	0	0	0	0	0	NA	NA	NA	NA	NA	no	0	NA	NA	NA	NA	NA	no	0	NA	NA	NA	NA	NA	no
Gm36969	1	104906523	ENSMUSG00000103060	predicted gene, 36969 [Source:MGI Symbol;Acc:MGI:5610197]	0	0	0	0	0	0	0	0	0	0	NA	NA	NA	NA	NA	no	0	NA	NA	NA	NA	NA	no	0	NA	NA	NA	NA	NA	no
Gm15699	1	104911431	ENSMUSG00000089866	predicted gene 15699 [Source:MGI Symbol;Acc:MGI:3783139]	0	0	0	0	0	0	0	0	0	0	NA	NA	NA	NA	NA	no	0	NA	NA	NA	NA	NA	no	0	NA	NA	NA	NA	NA	no
Gm29012	1	105116454	ENSMUSG00000099669	predicted gene 29012 [Source:MGI Symbol;Acc:MGI:5579718]	0	0	0	0	0	0	0	0	0	0	NA	NA	NA	NA	NA	no	0	NA	NA	NA	NA	NA	no	0	NA	NA	NA	NA	NA	no
Gm29013	1	105244425	ENSMUSG00000099702	predicted gene 29013 [Source:MGI Symbol;Acc:MGI:5579719]	0	0	0	0	0	0	0	0	0	0	NA	NA	NA	NA	NA	no	0	NA	NA	NA	NA	NA	no	0	NA	NA	NA	NA	NA	no
Rnf152	1	105276914	ENSMUSG00000047496	ring finger protein 152 [Source:MGI Symbol;Acc:MGI:2443787]	0	0	0	0	0	0	0	1	0	0.0754234	-0.270919	2.40591	-0.112606	0.910343	NA	no	0.0754234	-0.363204	2.40591	-0.150963	0.880005	NA	no	0.0754234	0	2.40591	0	1	NA	no
Gm29014	1	105321121	ENSMUSG00000099582	predicted gene 29014 [Source:MGI Symbol;Acc:MGI:5579720]	0	0	0	0	0	0	0	0	0	0	NA	NA	NA	NA	NA	no	0	NA	NA	NA	NA	NA	no	0	NA	NA	NA	NA	NA	no
Gm17634	1	105356007	ENSMUSG00000097482	predicted gene, 17634 [Source:MGI Symbol;Acc:MGI:4937268]	0	0	0	0	0	0	0	0	0	0	NA	NA	NA	NA	NA	no	0	NA	NA	NA	NA	NA	no	0	NA	NA	NA	NA	NA	no
Gm28403	1	105382260	ENSMUSG00000101214	predicted gene 28403 [Source:MGI Symbol;Acc:MGI:5579109]	0	0	0	0	0	0	0	0	0	0	NA	NA	NA	NA	NA	no	0	NA	NA	NA	NA	NA	no	0	NA	NA	NA	NA	NA	no
Gm3608	1	105455971	ENSMUSG00000067017	predicted gene 3608 [Source:MGI Symbol;Acc:MGI:3804932]	0	268	0	0	0	0	0	2	7	39.1072	3.88188	2.32566	1.66915	NA	NA	no	39.1072	-1.82869	2.34218	-0.780766	NA	NA	no	39.1072	5.71057	2.33874	2.44173	NA	NA	no
Pign	1	105518422	ENSMUSG00000056536	phosphatidylinositol glycan anchor biosynthesis, class N [Source:MGI Symbol;Acc:MGI:1351629]	0	0	117	0	0	0	371	0	0	37.2617	-0.635727	2.35836	-0.269563	NA	NA	no	37.2617	-3.93473	2.3626	-1.66542	NA	NA	no	37.2617	3.299	2.36289	1.39617	NA	NA	no
Gm28404	1	105564126	ENSMUSG00000100672	predicted gene 28404 [Source:MGI Symbol;Acc:MGI:5579110]	0	0	0	0	0	0	0	0	0	0	NA	NA	NA	NA	NA	no	0	NA	NA	NA	NA	NA	no	0	NA	NA	NA	NA	NA	no
Gm20302	1	105574537	ENSMUSG00000101219	predicted gene, 20302 [Source:MGI Symbol;Acc:MGI:5012487]	20	3	52	1	2	5	3	7	3	9.95647	2.74094	1.31765	2.08017	0.0375104	0.384917	no	9.95647	-0.353012	1.37405	-0.256914	0.797245	1	no	9.95647	3.09395	1.34232	2.30493	0.0211706	0.314401	no
Gm22426	1	105574687	ENSMUSG00000076999	predicted gene, 22426 [Source:MGI Symbol;Acc:MGI:5452203]	0	0	0	0	0	0	0	0	0	0	NA	NA	NA	NA	NA	no	0	NA	NA	NA	NA	NA	no	0	NA	NA	NA	NA	NA	no
Gm8004	1	105615742	ENSMUSG00000101656	predicted gene 8004 [Source:MGI Symbol;Acc:MGI:3648439]	0	0	0	0	0	0	0	0	1	0.107268	-0.270919	2.40591	-0.112606	0.910343	NA	no	0.107268	-0.363204	2.40591	-0.150963	0.880005	NA	no	0.107268	0	2.40591	0	1	NA	no
2310035C23Rik	1	105663861	ENSMUSG00000026319	RIKEN cDNA 2310035C23 gene [Source:MGI Symbol;Acc:MGI:1922832]	68	305	0	1	104	135	267	2	239	116.789	0.176245	1.76519	0.0998449	0.920467	1	no	116.789	-0.726664	1.76566	-0.411555	0.680666	1	no	116.789	0.902909	1.76579	0.511333	0.609118	1	no
Gm37566	1	105708573	ENSMUSG00000104044	predicted gene, 37566 [Source:MGI Symbol;Acc:MGI:5610794]	0	42	0	0	14	0	0	137	47	22.8622	-0.95723	2.30958	-0.414461	0.678537	1	no	22.8622	-2.17376	2.31096	-0.940633	0.346893	1	no	22.8622	1.21653	2.31178	0.526232	0.598727	1	no
Gm10193	1	105764444	ENSMUSG00000101330	predicted gene 10193 [Source:MGI Symbol;Acc:MGI:3708520]	0	0	0	0	0	0	0	0	0	0	NA	NA	NA	NA	NA	no	0	NA	NA	NA	NA	NA	no	0	NA	NA	NA	NA	NA	no
Tnfrsf11a	1	105780718	ENSMUSG00000026321	tumor necrosis factor receptor superfamily, member 11a, NFKB activator [Source:MGI Symbol;Acc:MGI:1314891]	0	0	0	0	0	0	0	0	0	0	NA	NA	NA	NA	NA	no	0	NA	NA	NA	NA	NA	no	0	NA	NA	NA	NA	NA	no
Gm37779	1	105887633	ENSMUSG00000102690	predicted gene, 37779 [Source:MGI Symbol;Acc:MGI:5611007]	0	0	0	0	0	0	0	0	0	0	NA	NA	NA	NA	NA	no	0	NA	NA	NA	NA	NA	no	0	NA	NA	NA	NA	NA	no
Gm26214	1	105945554	ENSMUSG00000089206	predicted gene, 26214 [Source:MGI Symbol;Acc:MGI:5455991]	0	0	0	0	0	0	0	0	0	0	NA	NA	NA	NA	NA	no	0	NA	NA	NA	NA	NA	no	0	NA	NA	NA	NA	NA	no
Gm18801	1	105955775	ENSMUSG00000099448	predicted gene, 18801 [Source:MGI Symbol;Acc:MGI:5010986]	0	0	0	0	0	0	0	0	0	0	NA	NA	NA	NA	NA	no	0	NA	NA	NA	NA	NA	no	0	NA	NA	NA	NA	NA	no
Gm7160	1	105979350	ENSMUSG00000099843	predicted gene 7160 [Source:MGI Symbol;Acc:MGI:3646078]	0	0	0	0	0	0	0	0	0	0	NA	NA	NA	NA	NA	no	0	NA	NA	NA	NA	NA	no	0	NA	NA	NA	NA	NA	no
Zcchc2	1	105990406	ENSMUSG00000038866	zinc finger, CCHC domain containing 2 [Source:MGI Symbol;Acc:MGI:2444114]	145	63	9	40	42	1	6	182	0	46.6734	0.640296	1.69342	0.378108	0.70535	1	no	46.6734	-0.563178	1.69522	-0.332216	0.739726	1	no	46.6734	1.20347	1.69503	0.710002	0.477703	1	no
Gm37372	1	106072584	ENSMUSG00000102501	predicted gene, 37372 [Source:MGI Symbol;Acc:MGI:5610600]	0	0	0	0	0	0	0	0	0	0	NA	NA	NA	NA	NA	no	0	NA	NA	NA	NA	NA	no	0	NA	NA	NA	NA	NA	no
Gm26509	1	106090068	ENSMUSG00000097612	predicted gene, 26509 [Source:MGI Symbol;Acc:MGI:5477003]	0	0	0	0	0	0	0	0	0	0	NA	NA	NA	NA	NA	no	0	NA	NA	NA	NA	NA	no	0	NA	NA	NA	NA	NA	no
Gm20753	1	106152625	ENSMUSG00000101583	predicted gene, 20753 [Source:MGI Symbol;Acc:MGI:5434109]	0	0	0	0	0	0	0	0	0	0	NA	NA	NA	NA	NA	no	0	NA	NA	NA	NA	NA	no	0	NA	NA	NA	NA	NA	no
Phlpp1	1	106171752	ENSMUSG00000044340	PH domain and leucine rich repeat protein phosphatase 1 [Source:MGI Symbol;Acc:MGI:2138327]	89	0	0	0	0	0	1	1	61	15.0381	0.243727	2.29727	0.106094	NA	NA	no	15.0381	-3.87431	2.31668	-1.67236	NA	NA	no	15.0381	4.11804	2.31689	1.7774	NA	NA	no
Gm38235	1	106219314	ENSMUSG00000103291	predicted gene, 38235 [Source:MGI Symbol;Acc:MGI:5611463]	0	0	0	0	0	0	0	0	0	0	NA	NA	NA	NA	NA	no	0	NA	NA	NA	NA	NA	no	0	NA	NA	NA	NA	NA	no
A530053M12Rik	1	106400178	ENSMUSG00000100247	RIKEN cDNA A530053M12 gene [Source:MGI Symbol;Acc:MGI:3045369]	0	0	0	0	0	0	0	0	0	0	NA	NA	NA	NA	NA	no	0	NA	NA	NA	NA	NA	no	0	NA	NA	NA	NA	NA	no
Gm6651	1	106439600	ENSMUSG00000099604	predicted gene 6651 [Source:MGI Symbol;Acc:MGI:3647491]	0	0	0	0	0	0	0	0	0	0	NA	NA	NA	NA	NA	no	0	NA	NA	NA	NA	NA	no	0	NA	NA	NA	NA	NA	no
Bcl2	1	106538178	ENSMUSG00000057329	B cell leukemia/lymphoma 2 [Source:MGI Symbol;Acc:MGI:88138]	615	797	803	855	831	799	1127	1058	708	746.627	0.18643	0.51405	0.362668	0.716853	1	no	746.627	0.15937	0.513967	0.310078	0.756502	1	no	746.627	0.0270599	0.514131	0.0526324	0.958025	1	no
D630008O14Rik	1	106541943	ENSMUSG00000054006	RIKEN cDNA D630008O14 gene [Source:MGI Symbol;Acc:MGI:3698880]	0	0	0	0	0	0	0	0	0	0	NA	NA	NA	NA	NA	no	0	NA	NA	NA	NA	NA	no	0	NA	NA	NA	NA	NA	no
Mir3473f	1	106546496	ENSMUSG00000098344	microRNA 3473f [Source:MGI Symbol;Acc:MGI:5531228]	0	0	0	0	0	0	0	0	0	0	NA	NA	NA	NA	NA	no	0	NA	NA	NA	NA	NA	no	0	NA	NA	NA	NA	NA	no
Gm37053	1	106604784	ENSMUSG00000103348	predicted gene, 37053 [Source:MGI Symbol;Acc:MGI:5610281]	0	0	0	0	0	0	0	0	0	0	NA	NA	NA	NA	NA	no	0	NA	NA	NA	NA	NA	no	0	NA	NA	NA	NA	NA	no
Kdsr	1	106720459	ENSMUSG00000009905	3-ketodihydrosphingosine reductase [Source:MGI Symbol;Acc:MGI:1918000]	52	102	80	93	0	65	5	252	222	87.6815	-0.540877	1.51952	-0.355952	0.721877	1	no	87.6815	-1.26233	1.52033	-0.830298	0.40637	1	no	87.6815	0.721453	1.52123	0.474256	0.635317	1	no
Vps4b	1	106764071	ENSMUSG00000009907	vacuolar protein sorting 4B [Source:MGI Symbol;Acc:MGI:1100499]	224	77	135	314	432	285	226	101	318	210.48	-0.251561	0.769688	-0.326835	0.743793	1	no	210.48	0.899688	0.767898	1.17162	0.241348	0.99311	no	210.48	-1.15125	0.769098	-1.49688	0.134424	0.825483	no
Serpinb5	1	106861173	ENSMUSG00000067006	serine (or cysteine) peptidase inhibitor, clade B, member 5 [Source:MGI Symbol;Acc:MGI:109579]	0	0	0	0	0	0	0	0	0	0	NA	NA	NA	NA	NA	no	0	NA	NA	NA	NA	NA	no	0	NA	NA	NA	NA	NA	no
Pou2f3-rs1	1	106887852	ENSMUSG00000083613	POU domain, class 2, transcription factor 3, related sequence 1 [Source:MGI Symbol;Acc:MGI:103144]	0	0	0	0	0	0	0	0	0	0	NA	NA	NA	NA	NA	no	0	NA	NA	NA	NA	NA	no	0	NA	NA	NA	NA	NA	no
Serpinb12	1	106934449	ENSMUSG00000059956	serine (or cysteine) peptidase inhibitor, clade B (ovalbumin), member 12 [Source:MGI Symbol;Acc:MGI:1919119]	0	0	0	0	0	0	0	0	0	0	NA	NA	NA	NA	NA	no	0	NA	NA	NA	NA	NA	no	0	NA	NA	NA	NA	NA	no
Serpinb13	1	106980984	ENSMUSG00000048775	serine (or cysteine) peptidase inhibitor, clade B (ovalbumin), member 13 [Source:MGI Symbol;Acc:MGI:3042250]	0	0	0	0	0	0	0	0	0	0	NA	NA	NA	NA	NA	no	0	NA	NA	NA	NA	NA	no	0	NA	NA	NA	NA	NA	no
Gm8080	1	107020137	ENSMUSG00000084228	predicted gene 8080 [Source:MGI Symbol;Acc:MGI:3646133]	0	0	0	0	0	0	0	0	0	0	NA	NA	NA	NA	NA	no	0	NA	NA	NA	NA	NA	no	0	NA	NA	NA	NA	NA	no
Serpinb3a	1	107045587	ENSMUSG00000044594	serine (or cysteine) peptidase inhibitor, clade B (ovalbumin), member 3A [Source:MGI Symbol;Acc:MGI:3573933]	0	0	0	0	0	0	0	0	0	0	NA	NA	NA	NA	NA	no	0	NA	NA	NA	NA	NA	no	0	NA	NA	NA	NA	NA	no
Serpinb3d	1	107078167	ENSMUSG00000058017	serine (or cysteine) peptidase inhibitor, clade B (ovalbumin), member 3D [Source:MGI Symbol;Acc:MGI:2683295]	0	0	0	0	0	0	0	0	0	0	NA	NA	NA	NA	NA	no	0	NA	NA	NA	NA	NA	no	0	NA	NA	NA	NA	NA	no
Gm15388	1	107137844	ENSMUSG00000083884	predicted gene 15388 [Source:MGI Symbol;Acc:MGI:3705340]	0	0	0	1	4	0	8	1	1	1.24151	-2.15562	2.38394	-0.904225	0.365876	NA	no	1.24151	-0.277691	2.36751	-0.117292	0.906628	NA	no	1.24151	-1.87793	2.38696	-0.786744	0.431432	NA	no
Serpinb3b	1	107153940	ENSMUSG00000073602	serine (or cysteine) peptidase inhibitor, clade B (ovalbumin), member 3B [Source:MGI Symbol;Acc:MGI:2683293]	0	0	0	0	0	0	0	0	0	0	NA	NA	NA	NA	NA	no	0	NA	NA	NA	NA	NA	no	0	NA	NA	NA	NA	NA	no
Gm8084	1	107191475	ENSMUSG00000080729	predicted gene 8084 [Source:MGI Symbol;Acc:MGI:3645945]	0	0	0	0	0	0	0	0	0	0	NA	NA	NA	NA	NA	no	0	NA	NA	NA	NA	NA	no	0	NA	NA	NA	NA	NA	no
Gm15390	1	107253553	ENSMUSG00000081114	predicted gene 15390 [Source:MGI Symbol;Acc:MGI:3705482]	5	1	2	2	7	1	1	4	3	2.58518	0.276109	1.61245	0.171236	0.864038	NA	no	2.58518	0.557351	1.59872	0.348623	0.727372	NA	no	2.58518	-0.281242	1.60593	-0.175128	0.860979	NA	no
Serpinb3c	1	107271201	ENSMUSG00000073601	serine (or cysteine) peptidase inhibitor, clade B, member 3C [Source:MGI Symbol;Acc:MGI:1277952]	0	0	0	0	0	0	0	0	0	0	NA	NA	NA	NA	NA	no	0	NA	NA	NA	NA	NA	no	0	NA	NA	NA	NA	NA	no
Gm8089	1	107290341	ENSMUSG00000084189	predicted gene 8089 [Source:MGI Symbol;Acc:MGI:3642979]	0	0	0	0	0	0	0	0	0	0	NA	NA	NA	NA	NA	no	0	NA	NA	NA	NA	NA	no	0	NA	NA	NA	NA	NA	no
Serpinb11	1	107361198	ENSMUSG00000026327	serine (or cysteine) peptidase inhibitor, clade B (ovalbumin), member 11 [Source:MGI Symbol;Acc:MGI:1914207]	0	0	0	0	0	0	0	0	0	0	NA	NA	NA	NA	NA	no	0	NA	NA	NA	NA	NA	no	0	NA	NA	NA	NA	NA	no
Gm15391	1	107385200	ENSMUSG00000087210	predicted gene 15391 [Source:MGI Symbol;Acc:MGI:3705314]	0	0	0	0	0	0	0	0	0	0	NA	NA	NA	NA	NA	no	0	NA	NA	NA	NA	NA	no	0	NA	NA	NA	NA	NA	no
Serpinb7	1	107399655	ENSMUSG00000067001	serine (or cysteine) peptidase inhibitor, clade B, member 7 [Source:MGI Symbol;Acc:MGI:2151053]	0	0	0	0	0	0	0	0	0	0	NA	NA	NA	NA	NA	no	0	NA	NA	NA	NA	NA	no	0	NA	NA	NA	NA	NA	no
Gm24553	1	107440047	ENSMUSG00000089278	predicted gene, 24553 [Source:MGI Symbol;Acc:MGI:5454330]	0	0	0	0	0	0	0	0	0	0	NA	NA	NA	NA	NA	no	0	NA	NA	NA	NA	NA	no	0	NA	NA	NA	NA	NA	no
Serpinb2	1	107511423	ENSMUSG00000062345	serine (or cysteine) peptidase inhibitor, clade B, member 2 [Source:MGI Symbol;Acc:MGI:97609]	0	0	0	0	0	0	0	0	0	0	NA	NA	NA	NA	NA	no	0	NA	NA	NA	NA	NA	no	0	NA	NA	NA	NA	NA	no
Serpinb10	1	107529003	ENSMUSG00000092572	serine (or cysteine) peptidase inhibitor, clade B (ovalbumin), member 10 [Source:MGI Symbol;Acc:MGI:2138648]	0	0	0	0	0	0	0	0	0	0	NA	NA	NA	NA	NA	no	0	NA	NA	NA	NA	NA	no	0	NA	NA	NA	NA	NA	no
Serpinb8	1	107590006	ENSMUSG00000026315	serine (or cysteine) peptidase inhibitor, clade B, member 8 [Source:MGI Symbol;Acc:MGI:894657]	0	0	0	0	0	0	0	0	0	0	NA	NA	NA	NA	NA	no	0	NA	NA	NA	NA	NA	no	0	NA	NA	NA	NA	NA	no
Gm15389	1	107687008	ENSMUSG00000086161	predicted gene 15389 [Source:MGI Symbol;Acc:MGI:3705287]	0	0	0	0	0	0	0	0	0	0	NA	NA	NA	NA	NA	no	0	NA	NA	NA	NA	NA	no	0	NA	NA	NA	NA	NA	no
Gm24267	1	107756602	ENSMUSG00000096241	predicted gene, 24267 [Source:MGI Symbol;Acc:MGI:5454044]	0	0	0	0	0	0	0	0	0	0	NA	NA	NA	NA	NA	no	0	NA	NA	NA	NA	NA	no	0	NA	NA	NA	NA	NA	no
Gm22438	1	107892974	ENSMUSG00000077237	predicted gene, 22438 [Source:MGI Symbol;Acc:MGI:5452215]	0	0	0	0	0	0	0	0	0	0	NA	NA	NA	NA	NA	no	0	NA	NA	NA	NA	NA	no	0	NA	NA	NA	NA	NA	no
D830032E09Rik	1	107917259	ENSMUSG00000100457	RIKEN cDNA D830032E09 gene [Source:MGI Symbol;Acc:MGI:2442347]	0	0	0	0	0	0	0	0	0	0	NA	NA	NA	NA	NA	no	0	NA	NA	NA	NA	NA	no	0	NA	NA	NA	NA	NA	no
Gm18448	1	107952837	ENSMUSG00000101477	predicted gene, 18448 [Source:MGI Symbol;Acc:MGI:5010633]	0	0	0	0	0	0	0	0	0	0	NA	NA	NA	NA	NA	no	0	NA	NA	NA	NA	NA	no	0	NA	NA	NA	NA	NA	no
Gm28282	1	107963122	ENSMUSG00000099484	predicted gene 28282 [Source:MGI Symbol;Acc:MGI:5578988]	0	0	0	0	0	0	0	0	0	0	NA	NA	NA	NA	NA	no	0	NA	NA	NA	NA	NA	no	0	NA	NA	NA	NA	NA	no
Gm5702	1	108376970	ENSMUSG00000100041	predicted gene 5702 [Source:MGI Symbol;Acc:MGI:3646157]	0	0	0	0	0	0	1	0	0	0.065138	-0.270919	2.40591	-0.112606	0.910343	NA	no	0.065138	-0.363204	2.40591	-0.150963	0.880005	NA	no	0.065138	0	2.40591	0	1	NA	no
Gm38212	1	108417077	ENSMUSG00000104478	predicted gene, 38212 [Source:MGI Symbol;Acc:MGI:5611440]	0	0	0	0	0	0	0	0	0	0	NA	NA	NA	NA	NA	no	0	NA	NA	NA	NA	NA	no	0	NA	NA	NA	NA	NA	no
Gm28283	1	108612337	ENSMUSG00000101231	predicted gene 28283 [Source:MGI Symbol;Acc:MGI:5578989]	0	0	0	0	0	0	0	0	0	0	NA	NA	NA	NA	NA	no	0	NA	NA	NA	NA	NA	no	0	NA	NA	NA	NA	NA	no
Gm6679	1	108770135	ENSMUSG00000101097	predicted gene 6679 [Source:MGI Symbol;Acc:MGI:3648541]	0	0	0	0	0	0	0	0	0	0	NA	NA	NA	NA	NA	no	0	NA	NA	NA	NA	NA	no	0	NA	NA	NA	NA	NA	no
Gm17847	1	108997634	ENSMUSG00000100831	predicted gene, 17847 [Source:MGI Symbol;Acc:MGI:5010032]	0	0	0	0	0	0	0	0	0	0	NA	NA	NA	NA	NA	no	0	NA	NA	NA	NA	NA	no	0	NA	NA	NA	NA	NA	no
Gm28281	1	109574943	ENSMUSG00000100884	predicted gene 28281 [Source:MGI Symbol;Acc:MGI:5578987]	0	0	0	0	0	0	0	0	0	0	NA	NA	NA	NA	NA	no	0	NA	NA	NA	NA	NA	no	0	NA	NA	NA	NA	NA	no
Gm22159	1	109623008	ENSMUSG00000089037	predicted gene, 22159 [Source:MGI Symbol;Acc:MGI:5451936]	0	0	0	0	0	0	0	0	0	0	NA	NA	NA	NA	NA	no	0	NA	NA	NA	NA	NA	no	0	NA	NA	NA	NA	NA	no
Gm25293	1	109804760	ENSMUSG00000084741	predicted gene, 25293 [Source:MGI Symbol;Acc:MGI:5455070]	0	0	0	0	0	0	0	0	0	0	NA	NA	NA	NA	NA	no	0	NA	NA	NA	NA	NA	no	0	NA	NA	NA	NA	NA	no
Gm8141	1	109833024	ENSMUSG00000100025	predicted gene 8141 [Source:MGI Symbol;Acc:MGI:3647473]	0	0	0	0	0	1	0	0	0	0.0925369	0	2.40591	0	1	NA	no	0.0925369	0.770953	2.40591	0.320441	0.748634	NA	no	0.0925369	-0.474794	2.40591	-0.197345	0.843558	NA	no
Cdh7	1	109982431	ENSMUSG00000026312	cadherin 7, type 2 [Source:MGI Symbol;Acc:MGI:2442792]	0	0	0	0	0	0	0	0	0	0	NA	NA	NA	NA	NA	no	0	NA	NA	NA	NA	NA	no	0	NA	NA	NA	NA	NA	no
Gm18552	1	110410743	ENSMUSG00000100290	predicted gene, 18552 [Source:MGI Symbol;Acc:MGI:5010737]	0	0	0	0	0	0	0	0	0	0	NA	NA	NA	NA	NA	no	0	NA	NA	NA	NA	NA	no	0	NA	NA	NA	NA	NA	no
Gm3332	1	110475603	ENSMUSG00000100758	predicted gene 3332 [Source:MGI Symbol;Acc:MGI:3781510]	0	0	0	0	0	0	0	0	0	0	NA	NA	NA	NA	NA	no	0	NA	NA	NA	NA	NA	no	0	NA	NA	NA	NA	NA	no
Gm6693	1	110600021	ENSMUSG00000099926	predicted gene 6693 [Source:MGI Symbol;Acc:MGI:3648678]	0	0	0	0	0	0	0	0	0	0	NA	NA	NA	NA	NA	no	0	NA	NA	NA	NA	NA	no	0	NA	NA	NA	NA	NA	no
Cdh19	1	110888326	ENSMUSG00000047216	cadherin 19, type 2 [Source:MGI Symbol;Acc:MGI:3588198]	0	0	0	0	0	0	0	0	0	0	NA	NA	NA	NA	NA	no	0	NA	NA	NA	NA	NA	no	0	NA	NA	NA	NA	NA	no
Gm38255	1	110957831	ENSMUSG00000102788	predicted gene, 38255 [Source:MGI Symbol;Acc:MGI:5611483]	0	0	0	0	0	0	0	0	0	0	NA	NA	NA	NA	NA	no	0	NA	NA	NA	NA	NA	no	0	NA	NA	NA	NA	NA	no
Gm36944	1	110964679	ENSMUSG00000102160	predicted gene, 36944 [Source:MGI Symbol;Acc:MGI:5610172]	0	0	0	0	0	0	0	0	0	0	NA	NA	NA	NA	NA	no	0	NA	NA	NA	NA	NA	no	0	NA	NA	NA	NA	NA	no
Gm29088	1	111385690	ENSMUSG00000101253	predicted gene 29088 [Source:MGI Symbol;Acc:MGI:5579794]	0	0	0	0	0	0	0	0	0	0	NA	NA	NA	NA	NA	no	0	NA	NA	NA	NA	NA	no	0	NA	NA	NA	NA	NA	no
Gm19927	1	111385918	ENSMUSG00000101846	predicted gene, 19927 [Source:MGI Symbol;Acc:MGI:5012112]	0	0	0	0	0	0	0	0	0	0	NA	NA	NA	NA	NA	no	0	NA	NA	NA	NA	NA	no	0	NA	NA	NA	NA	NA	no
Gm8173	1	111804934	ENSMUSG00000100555	predicted gene 8173 [Source:MGI Symbol;Acc:MGI:3648321]	0	0	0	0	0	0	0	0	0	0	NA	NA	NA	NA	NA	no	0	NA	NA	NA	NA	NA	no	0	NA	NA	NA	NA	NA	no
Gm37934	1	111833823	ENSMUSG00000102728	predicted gene, 37934 [Source:MGI Symbol;Acc:MGI:5611162]	0	0	0	0	0	0	0	0	0	0	NA	NA	NA	NA	NA	no	0	NA	NA	NA	NA	NA	no	0	NA	NA	NA	NA	NA	no
Dsel	1	111858702	ENSMUSG00000038702	dermatan sulfate epimerase-like [Source:MGI Symbol;Acc:MGI:2442948]	0	0	0	0	102	0	0	0	0	10.9301	0	2.40591	0	NA	NA	no	10.9301	5.673	2.38495	2.37866	NA	NA	no	10.9301	-5.55296	2.38495	-2.32833	NA	NA	no
Gm6028	1	111880735	ENSMUSG00000101875	predicted gene 6028 [Source:MGI Symbol;Acc:MGI:3648170]	1	0	0	0	0	0	0	0	0	0.0938667	0.863238	2.40591	0.358799	0.719746	NA	no	0.0938667	0	2.40591	0	1	NA	no	0.0938667	0.659364	2.40591	0.27406	0.784039	NA	no
Gm17752	1	112051069	ENSMUSG00000099732	predicted gene, 17752 [Source:MGI Symbol;Acc:MGI:5009836]	0	0	0	0	0	0	0	0	0	0	NA	NA	NA	NA	NA	no	0	NA	NA	NA	NA	NA	no	0	NA	NA	NA	NA	NA	no
Gm6717	1	112137868	ENSMUSG00000101220	predicted gene 6717 [Source:MGI Symbol;Acc:MGI:3647267]	0	0	0	0	0	0	0	0	0	0	NA	NA	NA	NA	NA	no	0	NA	NA	NA	NA	NA	no	0	NA	NA	NA	NA	NA	no
Gm19086	1	112151089	ENSMUSG00000100020	predicted gene, 19086 [Source:MGI Symbol;Acc:MGI:5011271]	0	0	1	0	0	0	0	0	0	0.111927	0.863238	2.40591	0.358799	0.719746	NA	no	0.111927	0	2.40591	0	1	NA	no	0.111927	0.659364	2.40591	0.27406	0.784039	NA	no
Gm18406	1	112404187	ENSMUSG00000101054	predicted gene, 18406 [Source:MGI Symbol;Acc:MGI:5010591]	0	0	0	0	0	0	0	0	0	0	NA	NA	NA	NA	NA	no	0	NA	NA	NA	NA	NA	no	0	NA	NA	NA	NA	NA	no
Gm22331	1	112467911	ENSMUSG00000088691	predicted gene, 22331 [Source:MGI Symbol;Acc:MGI:5452108]	0	0	0	0	0	0	0	0	0	0	NA	NA	NA	NA	NA	no	0	NA	NA	NA	NA	NA	no	0	NA	NA	NA	NA	NA	no
Gm8204	1	112873845	ENSMUSG00000099884	predicted gene 8204 [Source:MGI Symbol;Acc:MGI:3646498]	0	0	0	0	0	0	0	0	0	0	NA	NA	NA	NA	NA	no	0	NA	NA	NA	NA	NA	no	0	NA	NA	NA	NA	NA	no
Gm28190	1	112965542	ENSMUSG00000100304	predicted gene 28190 [Source:MGI Symbol;Acc:MGI:5578896]	0	0	0	0	0	0	0	0	0	0	NA	NA	NA	NA	NA	no	0	NA	NA	NA	NA	NA	no	0	NA	NA	NA	NA	NA	no
Gm28189	1	113289340	ENSMUSG00000101453	predicted gene 28189 [Source:MGI Symbol;Acc:MGI:5578895]	0	0	0	0	0	0	0	0	0	0	NA	NA	NA	NA	NA	no	0	NA	NA	NA	NA	NA	no	0	NA	NA	NA	NA	NA	no
Gm17946	1	113565446	ENSMUSG00000102105	predicted gene, 17946 [Source:MGI Symbol;Acc:MGI:5010131]	0	0	0	0	0	0	0	0	0	0	NA	NA	NA	NA	NA	no	0	NA	NA	NA	NA	NA	no	0	NA	NA	NA	NA	NA	no
Gm18181	1	113582771	ENSMUSG00000099943	predicted gene, 18181 [Source:MGI Symbol;Acc:MGI:5010366]	0	0	0	0	0	0	0	0	0	0	NA	NA	NA	NA	NA	no	0	NA	NA	NA	NA	NA	no	0	NA	NA	NA	NA	NA	no
Gm24937	1	113717914	ENSMUSG00000084546	predicted gene, 24937 [Source:MGI Symbol;Acc:MGI:5454714]	0	0	0	0	0	0	0	0	0	0	NA	NA	NA	NA	NA	no	0	NA	NA	NA	NA	NA	no	0	NA	NA	NA	NA	NA	no
9330185C12Rik	1	113891385	ENSMUSG00000097648	RIKEN cDNA 9330185C12 gene [Source:MGI Symbol;Acc:MGI:1924761]	0	0	0	0	0	0	0	0	0	0	NA	NA	NA	NA	NA	no	0	NA	NA	NA	NA	NA	no	0	NA	NA	NA	NA	NA	no
Gm4854	1	115219190	ENSMUSG00000101687	predicted gene 4854 [Source:MGI Symbol;Acc:MGI:3643638]	0	0	0	0	0	0	0	0	0	0	NA	NA	NA	NA	NA	no	0	NA	NA	NA	NA	NA	no	0	NA	NA	NA	NA	NA	no
Gm17916	1	115668988	ENSMUSG00000100515	predicted gene, 17916 [Source:MGI Symbol;Acc:MGI:5010101]	0	0	0	0	0	0	0	0	0	0	NA	NA	NA	NA	NA	no	0	NA	NA	NA	NA	NA	no	0	NA	NA	NA	NA	NA	no
Cntnap5a	1	115684756	ENSMUSG00000070695	contactin associated protein-like 5A [Source:MGI Symbol;Acc:MGI:3643623]	0	0	0	0	0	0	0	0	0	0	NA	NA	NA	NA	NA	no	0	NA	NA	NA	NA	NA	no	0	NA	NA	NA	NA	NA	no
Gm23393	1	116394342	ENSMUSG00000092948	predicted gene, 23393 [Source:MGI Symbol;Acc:MGI:5453170]	0	0	0	0	0	0	0	0	0	0	NA	NA	NA	NA	NA	no	0	NA	NA	NA	NA	NA	no	0	NA	NA	NA	NA	NA	no
Gm28263	1	116633777	ENSMUSG00000102033	predicted gene 28263 [Source:MGI Symbol;Acc:MGI:5578969]	0	0	0	0	0	0	0	0	0	0	NA	NA	NA	NA	NA	no	0	NA	NA	NA	NA	NA	no	0	NA	NA	NA	NA	NA	no
Gm19965	1	116802983	ENSMUSG00000094429	predicted gene, 19965 [Source:MGI Symbol;Acc:MGI:5012150]	0	0	0	0	0	0	0	0	0	0	NA	NA	NA	NA	NA	no	0	NA	NA	NA	NA	NA	no	0	NA	NA	NA	NA	NA	no
Gm17777	1	117392257	ENSMUSG00000101154	predicted gene, 17777 [Source:MGI Symbol;Acc:MGI:5009941]	0	0	0	0	0	0	0	0	0	0	NA	NA	NA	NA	NA	no	0	NA	NA	NA	NA	NA	no	0	NA	NA	NA	NA	NA	no
Gm24030	1	117536301	ENSMUSG00000065865	predicted gene, 24030 [Source:MGI Symbol;Acc:MGI:5453807]	0	0	0	0	0	0	0	0	0	0	NA	NA	NA	NA	NA	no	0	NA	NA	NA	NA	NA	no	0	NA	NA	NA	NA	NA	no
Gm27785	1	117561230	ENSMUSG00000098815	predicted gene, 27785 [Source:MGI Symbol;Acc:MGI:5531167]	0	0	0	0	0	0	0	0	0	0	NA	NA	NA	NA	NA	no	0	NA	NA	NA	NA	NA	no	0	NA	NA	NA	NA	NA	no
Gm28361	1	117578391	ENSMUSG00000101573	predicted gene 28361 [Source:MGI Symbol;Acc:MGI:5579067]	0	0	0	0	0	0	0	0	0	0	NA	NA	NA	NA	NA	no	0	NA	NA	NA	NA	NA	no	0	NA	NA	NA	NA	NA	no
Zfp813-ps	1	117603878	ENSMUSG00000107979	zinc finger protein 813, pseudogene [Source:MGI Symbol;Acc:MGI:3645355]	0	0	0	0	0	0	0	0	0	0	NA	NA	NA	NA	NA	no	0	NA	NA	NA	NA	NA	no	0	NA	NA	NA	NA	NA	no
Zfp813-ps	1	117625522	ENSMUSG00000101373	zinc finger protein 813, pseudogene [Source:MGI Symbol;Acc:MGI:3645355]	0	0	0	0	0	0	0	0	0	0	NA	NA	NA	NA	NA	no	0	NA	NA	NA	NA	NA	no	0	NA	NA	NA	NA	NA	no
Gm28362	1	117662291	ENSMUSG00000099615	predicted gene 28362 [Source:MGI Symbol;Acc:MGI:5579068]	0	0	0	0	0	0	0	0	0	0	NA	NA	NA	NA	NA	no	0	NA	NA	NA	NA	NA	no	0	NA	NA	NA	NA	NA	no
Gm28363	1	117697131	ENSMUSG00000100265	predicted gene 28363 [Source:MGI Symbol;Acc:MGI:5579069]	0	0	0	0	0	0	0	0	0	0	NA	NA	NA	NA	NA	no	0	NA	NA	NA	NA	NA	no	0	NA	NA	NA	NA	NA	no
Gm28359	1	117741367	ENSMUSG00000100527	predicted gene 28359 [Source:MGI Symbol;Acc:MGI:5579065]	0	0	0	0	0	0	0	0	0	0	NA	NA	NA	NA	NA	no	0	NA	NA	NA	NA	NA	no	0	NA	NA	NA	NA	NA	no
Gm18182	1	117747031	ENSMUSG00000099571	predicted gene, 18182 [Source:MGI Symbol;Acc:MGI:5010367]	0	0	0	0	0	0	0	0	0	0	NA	NA	NA	NA	NA	no	0	NA	NA	NA	NA	NA	no	0	NA	NA	NA	NA	NA	no
B020011L13Rik	1	117781133	ENSMUSG00000101303	RIKEN cDNA B020011L13 gene [Source:MGI Symbol;Acc:MGI:3588191]	0	0	0	0	0	0	0	0	0	0	NA	NA	NA	NA	NA	no	0	NA	NA	NA	NA	NA	no	0	NA	NA	NA	NA	NA	no
Gm28360	1	117830081	ENSMUSG00000100305	predicted gene 28360 [Source:MGI Symbol;Acc:MGI:5579066]	0	0	0	0	0	0	0	0	0	0	NA	NA	NA	NA	NA	no	0	NA	NA	NA	NA	NA	no	0	NA	NA	NA	NA	NA	no
Gm28169	1	117842962	ENSMUSG00000099534	predicted gene 28169 [Source:MGI Symbol;Acc:MGI:5578875]	0	0	0	0	0	0	0	0	0	0	NA	NA	NA	NA	NA	no	0	NA	NA	NA	NA	NA	no	0	NA	NA	NA	NA	NA	no
Gm7195	1	117868522	ENSMUSG00000100886	predicted gene 7195 [Source:MGI Symbol;Acc:MGI:3779695]	0	0	0	0	0	0	0	0	0	0	NA	NA	NA	NA	NA	no	0	NA	NA	NA	NA	NA	no	0	NA	NA	NA	NA	NA	no
Gm28168	1	117928015	ENSMUSG00000101415	predicted gene 28168 [Source:MGI Symbol;Acc:MGI:5578874]	0	0	0	0	0	0	0	0	0	0	NA	NA	NA	NA	NA	no	0	NA	NA	NA	NA	NA	no	0	NA	NA	NA	NA	NA	no
Gm7145	1	117965939	ENSMUSG00000100617	predicted gene 7145 [Source:MGI Symbol;Acc:MGI:3648947]	0	0	0	0	0	0	0	0	0	0	NA	NA	NA	NA	NA	no	0	NA	NA	NA	NA	NA	no	0	NA	NA	NA	NA	NA	no
Gm28358	1	118008769	ENSMUSG00000100703	predicted gene 28358 [Source:MGI Symbol;Acc:MGI:5579064]	0	0	0	0	0	0	0	0	0	0	NA	NA	NA	NA	NA	no	0	NA	NA	NA	NA	NA	no	0	NA	NA	NA	NA	NA	no
Gm29489	1	118030315	ENSMUSG00000100177	predicted gene 29489 [Source:MGI Symbol;Acc:MGI:5580195]	0	0	0	0	0	0	0	0	0	0	NA	NA	NA	NA	NA	no	0	NA	NA	NA	NA	NA	no	0	NA	NA	NA	NA	NA	no
Gm29490	1	118040649	ENSMUSG00000101363	predicted gene 29490 [Source:MGI Symbol;Acc:MGI:5580196]	0	0	0	0	0	0	0	0	0	0	NA	NA	NA	NA	NA	no	0	NA	NA	NA	NA	NA	no	0	NA	NA	NA	NA	NA	no
Gm29104	1	118064118	ENSMUSG00000101590	predicted gene 29104 [Source:MGI Symbol;Acc:MGI:5579810]	0	0	0	0	0	0	0	0	0	0	NA	NA	NA	NA	NA	no	0	NA	NA	NA	NA	NA	no	0	NA	NA	NA	NA	NA	no
Gm29106	1	118176542	ENSMUSG00000102030	predicted gene 29106 [Source:MGI Symbol;Acc:MGI:5579812]	0	0	0	0	0	0	0	0	0	0	NA	NA	NA	NA	NA	no	0	NA	NA	NA	NA	NA	no	0	NA	NA	NA	NA	NA	no
Gm7200	1	118249863	ENSMUSG00000099870	predicted gene 7200 [Source:MGI Symbol;Acc:MGI:3644666]	0	0	0	0	0	0	0	0	0	0	NA	NA	NA	NA	NA	no	0	NA	NA	NA	NA	NA	no	0	NA	NA	NA	NA	NA	no
Tsn	1	118294778	ENSMUSG00000026374	translin [Source:MGI Symbol;Acc:MGI:109263]	632	1071	766	981	860	1101	1938	1079	1112	925.688	-0.133161	0.598584	-0.22246	0.823956	1	no	925.688	-0.117039	0.598506	-0.195552	0.844961	1	no	925.688	-0.0161223	0.59873	-0.0269274	0.978518	1	no
Nifk	1	118321839	ENSMUSG00000026377	nucleolar protein interacting with the FHA domain of MKI67 [Source:MGI Symbol;Acc:MGI:1915199]	2	85	7	1	0	126	432	419	106	95.9698	-2.11268	1.69991	-1.24282	0.213935	0.839648	no	95.9698	-2.23957	1.69982	-1.31753	0.18766	0.926478	no	95.9698	0.126896	1.70205	0.0745545	0.940569	1	no
Gm28867	1	118357312	ENSMUSG00000099936	predicted gene 28867 [Source:MGI Symbol;Acc:MGI:5579573]	0	0	0	0	0	0	0	0	0	0	NA	NA	NA	NA	NA	no	0	NA	NA	NA	NA	NA	no	0	NA	NA	NA	NA	NA	no
Clasp1	1	118389058	ENSMUSG00000064302	CLIP associating protein 1 [Source:MGI Symbol;Acc:MGI:1923957]	1	1	0	2	0	63	0	0	68	13.5787	-3.16083	2.23526	-1.41407	NA	NA	no	13.5787	-0.202879	2.21945	-0.0914097	NA	NA	no	13.5787	-2.95795	2.23588	-1.32295	NA	NA	no
Gm26080	1	118453355	ENSMUSG00000077257	predicted gene, 26080 [Source:MGI Symbol;Acc:MGI:5455857]	0	0	0	0	0	0	0	0	0	0	NA	NA	NA	NA	NA	no	0	NA	NA	NA	NA	NA	no	0	NA	NA	NA	NA	NA	no
2900060B14Rik	1	118458652	ENSMUSG00000107722	RIKEN cDNA 2900060B14 gene [Source:MGI Symbol;Acc:MGI:1915454]	0	1	118	0	116	8	5	436	42	64.2361	-1.20536	1.95846	-0.615464	0.538248	0.99208	no	64.2361	-1.22118	1.95829	-0.623593	0.532895	1	no	64.2361	0.015814	1.95943	0.0080707	0.993561	1	no
Gm22710	1	118459141	ENSMUSG00000080542	predicted gene, 22710 [Source:MGI Symbol;Acc:MGI:5452487]	0	0	0	0	0	0	0	0	0	0	NA	NA	NA	NA	NA	no	0	NA	NA	NA	NA	NA	no	0	NA	NA	NA	NA	NA	no
Gm28466	1	118478604	ENSMUSG00000100770	predicted gene 28466 [Source:MGI Symbol;Acc:MGI:5579172]	0	0	0	0	0	0	0	0	0	0	NA	NA	NA	NA	NA	no	0	NA	NA	NA	NA	NA	no	0	NA	NA	NA	NA	NA	no
Tfcp2l1	1	118627945	ENSMUSG00000026380	transcription factor CP2-like 1 [Source:MGI Symbol;Acc:MGI:2444691]	0	0	1	0	0	0	0	0	0	0.111927	0.863238	2.40591	0.358799	0.719746	NA	no	0.111927	0	2.40591	0	1	NA	no	0.111927	0.659364	2.40591	0.27406	0.784039	NA	no
Gm22094	1	118638288	ENSMUSG00000089601	predicted gene, 22094 [Source:MGI Symbol;Acc:MGI:5451871]	0	0	0	0	0	0	0	0	0	0	NA	NA	NA	NA	NA	no	0	NA	NA	NA	NA	NA	no	0	NA	NA	NA	NA	NA	no
Gm28882	1	118651482	ENSMUSG00000101624	predicted gene 28882 [Source:MGI Symbol;Acc:MGI:5579588]	0	0	0	0	1	0	0	0	0	0.107157	0	2.40591	0	1	NA	no	0.107157	0.770953	2.40591	0.320441	0.748634	NA	no	0.107157	-0.474794	2.40591	-0.197345	0.843558	NA	no
Gm23497	1	118681821	ENSMUSG00000088363	predicted gene, 23497 [Source:MGI Symbol;Acc:MGI:5453274]	0	0	0	0	0	0	0	0	0	0	NA	NA	NA	NA	NA	no	0	NA	NA	NA	NA	NA	no	0	NA	NA	NA	NA	NA	no
Gm28467	1	118810136	ENSMUSG00000100040	predicted gene 28467 [Source:MGI Symbol;Acc:MGI:5579173]	0	0	0	0	0	0	0	0	0	0	NA	NA	NA	NA	NA	no	0	NA	NA	NA	NA	NA	no	0	NA	NA	NA	NA	NA	no
Gli2	1	118834132	ENSMUSG00000048402	GLI-Kruppel family member GLI2 [Source:MGI Symbol;Acc:MGI:95728]	0	0	0	0	0	0	0	0	0	0	NA	NA	NA	NA	NA	no	0	NA	NA	NA	NA	NA	no	0	NA	NA	NA	NA	NA	no
Mir6346	1	118954220	ENSMUSG00000098273	microRNA 6346 [Source:MGI Symbol;Acc:MGI:5531211]	0	0	0	0	0	0	0	0	0	0	NA	NA	NA	NA	NA	no	0	NA	NA	NA	NA	NA	no	0	NA	NA	NA	NA	NA	no
Gm26831	1	119058469	ENSMUSG00000097408	predicted gene, 26831 [Source:MGI Symbol;Acc:MGI:5477325]	0	0	0	0	0	0	0	0	0	0	NA	NA	NA	NA	NA	no	0	NA	NA	NA	NA	NA	no	0	NA	NA	NA	NA	NA	no
Gm8321	1	119157586	ENSMUSG00000096939	predicted gene 8321 [Source:MGI Symbol;Acc:MGI:3646697]	0	0	0	0	0	0	0	0	0	0	NA	NA	NA	NA	NA	no	0	NA	NA	NA	NA	NA	no	0	NA	NA	NA	NA	NA	no
Gm3508	1	119241962	ENSMUSG00000100767	predicted gene 3508 [Source:MGI Symbol;Acc:MGI:3781685]	1	2	0	0	1	1	0	0	1	0.685945	1.17876	2.39519	0.492134	0.622624	NA	no	0.685945	0.606251	2.39912	0.252697	0.800502	NA	no	0.685945	0.572504	2.39322	0.239219	0.810936	NA	no
Gm29456	1	119305346	ENSMUSG00000099860	predicted gene 29456 [Source:MGI Symbol;Acc:MGI:5580162]	0	0	0	0	0	0	0	0	0	0	NA	NA	NA	NA	NA	no	0	NA	NA	NA	NA	NA	no	0	NA	NA	NA	NA	NA	no
Gm29455	1	119329200	ENSMUSG00000101179	predicted gene 29455 [Source:MGI Symbol;Acc:MGI:5580161]	0	0	0	0	0	0	0	0	0	0	NA	NA	NA	NA	NA	no	0	NA	NA	NA	NA	NA	no	0	NA	NA	NA	NA	NA	no
Inhbb	1	119415465	ENSMUSG00000037035	inhibin beta-B [Source:MGI Symbol;Acc:MGI:96571]	0	0	0	0	0	0	0	0	0	0	NA	NA	NA	NA	NA	no	0	NA	NA	NA	NA	NA	no	0	NA	NA	NA	NA	NA	no
Ralb	1	119470305	ENSMUSG00000004451	v-ral simian leukemia viral oncogene B [Source:MGI Symbol;Acc:MGI:1927244]	1	1	0	3	3	0	0	1	0	0.960562	0.801978	2.39751	0.334504	0.737999	NA	no	0.960562	1.75746	2.38881	0.735703	0.461912	NA	no	0.960562	-0.955477	2.38616	-0.400424	0.688844	NA	no
Gm29454	1	119499477	ENSMUSG00000101437	predicted gene 29454 [Source:MGI Symbol;Acc:MGI:5580160]	0	0	0	0	0	0	0	0	0	0	NA	NA	NA	NA	NA	no	0	NA	NA	NA	NA	NA	no	0	NA	NA	NA	NA	NA	no
Gm27184	1	119520090	ENSMUSG00000098447	predicted gene 27184 [Source:MGI Symbol;Acc:MGI:5521027]	0	0	0	0	0	0	0	0	0	0	NA	NA	NA	NA	NA	no	0	NA	NA	NA	NA	NA	no	0	NA	NA	NA	NA	NA	no
Tmem185b	1	119526160	ENSMUSG00000098923	transmembrane protein 185B [Source:MGI Symbol;Acc:MGI:1917634]	282	0	47	0	0	116	1	3	87	52.089	1.31003	2.10632	0.621952	0.533973	0.99208	no	52.089	0.117602	2.10696	0.0558162	0.955488	1	no	52.089	1.19243	2.10648	0.566075	0.571343	1	no
3830432H09Rik	1	119529480	ENSMUSG00000101731	RIKEN cDNA 3830432H09 gene [Source:MGI Symbol;Acc:MGI:2443278]	0	0	0	0	0	0	0	0	0	0	NA	NA	NA	NA	NA	no	0	NA	NA	NA	NA	NA	no	0	NA	NA	NA	NA	NA	no
Gm25322	1	119530211	ENSMUSG00000084505	predicted gene, 25322 [Source:MGI Symbol;Acc:MGI:5455099]	0	0	0	0	0	0	0	0	0	0	NA	NA	NA	NA	NA	no	0	NA	NA	NA	NA	NA	no	0	NA	NA	NA	NA	NA	no
Epb41l5	1	119545037	ENSMUSG00000026383	erythrocyte membrane protein band 4.1 like 5 [Source:MGI Symbol;Acc:MGI:103006]	73	1	0	1	0	0	0	0	0	7.1039	4.78342	2.38399	2.00648	NA	NA	no	7.1039	0.834469	2.39979	0.347725	NA	NA	no	7.1039	3.94895	2.37953	1.65955	NA	NA	no
Gm37219	1	119630744	ENSMUSG00000102687	predicted gene, 37219 [Source:MGI Symbol;Acc:MGI:5610447]	0	0	0	1	0	0	0	0	0	0.109081	0	2.40591	0	1	NA	no	0.109081	0.770953	2.40591	0.320441	0.748634	NA	no	0.109081	-0.474794	2.40591	-0.197345	0.843558	NA	no
Ptpn4	1	119652467	ENSMUSG00000026384	protein tyrosine phosphatase, non-receptor type 4 [Source:MGI Symbol;Acc:MGI:1099792]	38	101	0	2	65	0	2	243	1	43.7141	-0.0390103	1.9976	-0.0195285	0.984419	1	no	43.7141	-1.072	1.99865	-0.536365	0.591706	1	no	43.7141	1.03299	1.99904	0.516745	0.605334	1	no
Gm3851	1	119787769	ENSMUSG00000091876	predicted gene 3851 [Source:MGI Symbol;Acc:MGI:3782023]	0	0	0	0	0	0	0	0	0	0	NA	NA	NA	NA	NA	no	0	NA	NA	NA	NA	NA	no	0	NA	NA	NA	NA	NA	no
Gm37745	1	119790763	ENSMUSG00000103146	predicted gene, 37745 [Source:MGI Symbol;Acc:MGI:5610973]	0	0	0	0	0	0	0	0	0	0	NA	NA	NA	NA	NA	no	0	NA	NA	NA	NA	NA	no	0	NA	NA	NA	NA	NA	no
Gm29657	1	119793520	ENSMUSG00000100436	predicted gene 29657 [Source:MGI Symbol;Acc:MGI:5580363]	0	0	0	0	0	0	0	0	0	0	NA	NA	NA	NA	NA	no	0	NA	NA	NA	NA	NA	no	0	NA	NA	NA	NA	NA	no
Gm8338	1	119817763	ENSMUSG00000090277	predicted gene 8338 [Source:MGI Symbol;Acc:MGI:3647186]	0	0	0	0	0	0	0	0	0	0	NA	NA	NA	NA	NA	no	0	NA	NA	NA	NA	NA	no	0	NA	NA	NA	NA	NA	no
Gm29658	1	119874781	ENSMUSG00000100042	predicted gene 29658 [Source:MGI Symbol;Acc:MGI:5580364]	0	0	0	0	1	0	0	1	0	0.182581	-0.270919	2.40591	-0.112606	0.910343	NA	no	0.182581	0.203875	2.40591	0.0847391	0.932469	NA	no	0.182581	-0.474794	2.40591	-0.197345	0.843558	NA	no
Gm3551	1	119897461	ENSMUSG00000100636	predicted gene 3551 [Source:MGI Symbol;Acc:MGI:3781728]	0	0	0	0	0	0	0	0	0	0	NA	NA	NA	NA	NA	no	0	NA	NA	NA	NA	NA	no	0	NA	NA	NA	NA	NA	no
Gm28209	1	119903130	ENSMUSG00000101224	predicted gene 28209 [Source:MGI Symbol;Acc:MGI:5578915]	0	0	0	0	0	0	0	0	0	0	NA	NA	NA	NA	NA	no	0	NA	NA	NA	NA	NA	no	0	NA	NA	NA	NA	NA	no
Tmem177	1	119907890	ENSMUSG00000036975	transmembrane protein 177 [Source:MGI Symbol;Acc:MGI:1913593]	29	0	0	0	0	10	0	14	0	4.70343	0.880163	2.36319	0.372447	NA	NA	no	4.70343	-0.111438	2.365	-0.0471196	NA	NA	no	4.70343	0.9916	2.36427	0.419412	NA	NA	no
Cfap221	1	119923341	ENSMUSG00000036962	cilia and flagella associated protein 221 [Source:MGI Symbol;Acc:MGI:2684947]	0	0	0	0	0	0	0	0	0	0	NA	NA	NA	NA	NA	no	0	NA	NA	NA	NA	NA	no	0	NA	NA	NA	NA	NA	no
Gm17973	1	119986795	ENSMUSG00000092245	predicted gene, 17973 [Source:MGI Symbol;Acc:MGI:5010158]	0	0	0	0	0	0	0	0	0	0	NA	NA	NA	NA	NA	no	0	NA	NA	NA	NA	NA	no	0	NA	NA	NA	NA	NA	no
Sctr	1	120006894	ENSMUSG00000026387	secretin receptor [Source:MGI Symbol;Acc:MGI:2441720]	0	0	0	0	0	0	0	0	0	0	NA	NA	NA	NA	NA	no	0	NA	NA	NA	NA	NA	no	0	NA	NA	NA	NA	NA	no
Tmem37	1	120067377	ENSMUSG00000050777	transmembrane protein 37 [Source:MGI Symbol;Acc:MGI:2157899]	0	0	0	0	0	0	0	0	0	0	NA	NA	NA	NA	NA	no	0	NA	NA	NA	NA	NA	no	0	NA	NA	NA	NA	NA	no
Dbi	1	120113280	ENSMUSG00000026385	diazepam binding inhibitor [Source:MGI Symbol;Acc:MGI:94865]	860	909	1030	1880	1347	637	3682	1757	620	1172.82	-0.420013	0.769705	-0.54568	0.585286	1	no	1172.82	-0.101544	0.76958	-0.131947	0.895026	1	no	1172.82	-0.318469	0.769782	-0.413713	0.679084	1	no
3110009E18Rik	1	120121187	ENSMUSG00000026388	RIKEN cDNA 3110009E18 gene [Source:MGI Symbol;Acc:MGI:1920353]	8	54	224	0	44	0	0	0	63	44.9935	1.72774	2.17002	0.796186	0.425924	0.980707	no	44.9935	-0.358258	2.17151	-0.164981	0.868959	1	no	44.9935	2.086	2.17078	0.960944	0.33658	1	no
Steap3	1	120190757	ENSMUSG00000026389	STEAP family member 3 [Source:MGI Symbol;Acc:MGI:1915678]	0	0	0	0	0	0	0	0	0	0	NA	NA	NA	NA	NA	no	0	NA	NA	NA	NA	NA	no	0	NA	NA	NA	NA	NA	no
C1ql2	1	120340582	ENSMUSG00000036907	complement component 1, q subcomponent-like 2 [Source:MGI Symbol;Acc:MGI:3032521]	0	0	0	0	0	0	0	0	0	0	NA	NA	NA	NA	NA	no	0	NA	NA	NA	NA	NA	no	0	NA	NA	NA	NA	NA	no
1700012E03Rik	1	120435805	ENSMUSG00000101275	RIKEN cDNA 1700012E03 gene [Source:MGI Symbol;Acc:MGI:1923817]	0	0	0	0	0	0	0	0	0	0	NA	NA	NA	NA	NA	no	0	NA	NA	NA	NA	NA	no	0	NA	NA	NA	NA	NA	no
Marco	1	120474538	ENSMUSG00000026390	macrophage receptor with collagenous structure [Source:MGI Symbol;Acc:MGI:1309998]	0	0	0	0	0	0	0	0	0	0	NA	NA	NA	NA	NA	no	0	NA	NA	NA	NA	NA	no	0	NA	NA	NA	NA	NA	no
En1	1	120602418	ENSMUSG00000058665	engrailed 1 [Source:MGI Symbol;Acc:MGI:95389]	0	0	0	0	0	0	0	0	0	0	NA	NA	NA	NA	NA	no	0	NA	NA	NA	NA	NA	no	0	NA	NA	NA	NA	NA	no
2610027F03Rik	1	120621740	ENSMUSG00000099957	RIKEN cDNA 2610027F03 gene [Source:MGI Symbol;Acc:MGI:1917154]	0	0	0	0	0	0	0	0	0	0	NA	NA	NA	NA	NA	no	0	NA	NA	NA	NA	NA	no	0	NA	NA	NA	NA	NA	no
Gm29346	1	120758443	ENSMUSG00000101386	predicted gene 29346 [Source:MGI Symbol;Acc:MGI:5580052]	0	0	0	0	0	0	0	0	0	0	NA	NA	NA	NA	NA	no	0	NA	NA	NA	NA	NA	no	0	NA	NA	NA	NA	NA	no
Gm29345	1	120816500	ENSMUSG00000101922	predicted gene 29345 [Source:MGI Symbol;Acc:MGI:5580051]	0	0	0	0	0	0	0	0	0	0	NA	NA	NA	NA	NA	no	0	NA	NA	NA	NA	NA	no	0	NA	NA	NA	NA	NA	no
Gm29344	1	120825247	ENSMUSG00000100761	predicted gene 29344 [Source:MGI Symbol;Acc:MGI:5580050]	0	0	0	0	0	0	0	0	0	0	NA	NA	NA	NA	NA	no	0	NA	NA	NA	NA	NA	no	0	NA	NA	NA	NA	NA	no
Gm29348	1	120847989	ENSMUSG00000099336	predicted gene 29348 [Source:MGI Symbol;Acc:MGI:5580054]	0	0	0	0	0	0	0	0	0	0	NA	NA	NA	NA	NA	no	0	NA	NA	NA	NA	NA	no	0	NA	NA	NA	NA	NA	no
Gm29347	1	120856674	ENSMUSG00000100979	predicted gene 29347 [Source:MGI Symbol;Acc:MGI:5580053]	0	0	0	0	0	0	0	0	0	0	NA	NA	NA	NA	NA	no	0	NA	NA	NA	NA	NA	no	0	NA	NA	NA	NA	NA	no
Gm37043	1	120868996	ENSMUSG00000102360	predicted gene, 37043 [Source:MGI Symbol;Acc:MGI:5610271]	0	0	0	0	0	0	0	0	0	0	NA	NA	NA	NA	NA	no	0	NA	NA	NA	NA	NA	no	0	NA	NA	NA	NA	NA	no
Celrr	1	121087405	ENSMUSG00000097881	cerebellum expressed regulatory RNA [Source:MGI Symbol;Acc:MGI:2685664]	0	0	0	0	0	0	0	0	0	0	NA	NA	NA	NA	NA	no	0	NA	NA	NA	NA	NA	no	0	NA	NA	NA	NA	NA	no
Gm29359	1	121224276	ENSMUSG00000101700	predicted gene 29359 [Source:MGI Symbol;Acc:MGI:5580065]	0	0	0	0	0	0	0	0	0	0	NA	NA	NA	NA	NA	no	0	NA	NA	NA	NA	NA	no	0	NA	NA	NA	NA	NA	no
[truncated: 50,584 more rows]
